# Supplementary material for: Elucidation of the anti-colorectal cancer mechanism of Atractylodes lancea by network pharmacology and experimental verification
Source: publisher site journal article supplement (doi:10.18632/aging.206075), 2024-08-22
Supplement: Supplementary file [file aging-v16i16-206075-supplementary-material-SD1.pdf]

## SUPPLEMENTARY MATERIALS

### Supplementary Figures

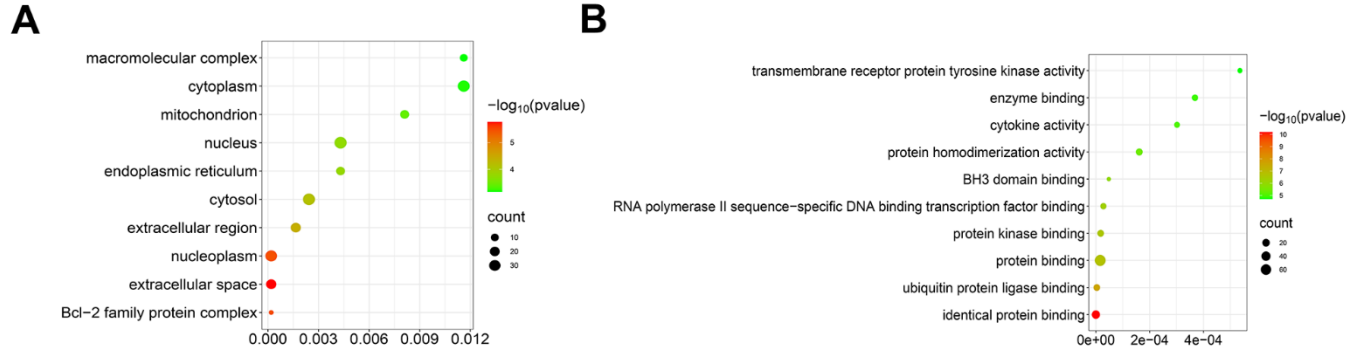

**Supplementary Figure 1. GO enrichment analysis shows the cellular components and molecular function of 73 overlapping genes. (A)** GO enrichment analysis shows the intersection target genes in cellular components localization and the top 10 results were displayed. **(B)** GO enrichment analysis shows the intersection target genes in molecular function localization and the top 10 results were displayed.

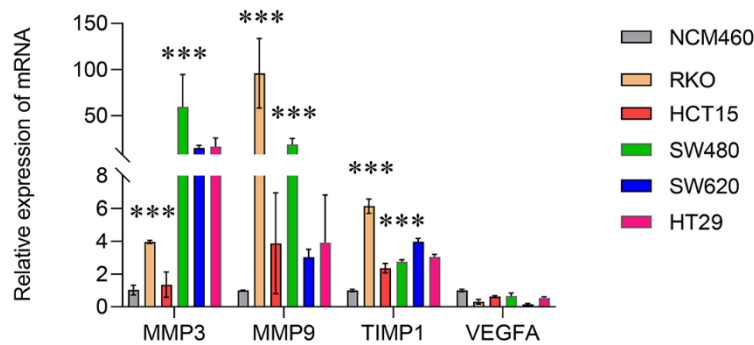

**Supplementary Figure 2. The expression levels of MMP3, MMP9, TIMP1 and VEGFA in CRC cell lines were detected by qRT-PCR.**
