# Supplementary material for: Elucidation of the anti-colorectal cancer mechanism of Atractylodes lancea by network pharmacology and experimental verification
Source: publisher site journal article supplement (doi:10.18632/aging.206075), 2024-08-22
Supplement: Supplementary file [file aging-v16i16-206075-supplementary-material-SD2.pdf]

## SUPPLEMENTARY TABLES

**Supplementary Table 1. Sequence information for primers used in qRT-PCR.**

| Gene         | Forward sequence             | Reverse sequence             |
|--------------|------------------------------|------------------------------|
| <i>18S</i>   | 5'-AACCCGTTGAACCCCAT -3'     | 5'-CCATCCAATCGGTAGTAGCG -3'  |
| <i>MMP3</i>  | 5'- CGGTTCCGCCTGTCTCAAG-3'   | 5'- CGCCAAAAGTGCCTGTCTT-3'   |
| <i>MMP9</i>  | 5'- GGGACGCAGACATCGTCATC-3'  | 5'- TCGTCATCGTCGAAATGGGC-3'  |
| <i>TIMP1</i> | 5'- AGAGTGTCTGCGGATACTTCC-3' | 5'- CCAACAGTGTAGGTCTTGGTG-3' |
| <i>VEGFA</i> | 5'- AGGGCAGAATCATCACGAAGT-3' | 5'- AGGGTCTCGATTGGATGGCA-3'  |

**Supplementary Table 2. The active ingredients of *Atractylodes lancea*.**

| PubChem_ID   | Cpd_name                    |
|--------------|-----------------------------|
| CID:10228    | Osthole                     |
| CID:6989     | Thymol                      |
| CID:8468     | Vanillic Acid               |
| CID:5281703  | Wogonin                     |
| CID:931      | Naphthalene                 |
| CID:996      | Phenol                      |
| CID:985      | Palmitic Acid               |
| CID:1140     | Toluene                     |
| CID:7095     | Biphenyl                    |
| CID:7410     | Acetophenone                |
| CID:31423    | Pyrene                      |
| CID:31404    | Butylated Hydroxytoluene    |
| CID:445639   | Oleic Acid                  |
| CID:222284   | Beta-Sitosterol             |
| CID:853433   | Isoeugenol                  |
| CID:5280445  | Luteolin                    |
| CID:5280450  | Linoleic Acid               |
| CID:5281416  | Esculetin                   |
| CID:6054     | Phenylethyl Alcohol         |
| CID:440917   | D-Limonene                  |
| CID:227829   | Guaiol                      |
| CID:5281522  | Isocaryophyllene            |
| CID:91457    | beta-Eudesmol               |
| CID:5283349  | 2,4-Decadienal              |
| CID:5281520  | Alpha-Humulone              |
| CID:5281515  | Caryophyllene               |
| CID:7044     | Decahydronaphthalene        |
| CID:7461     | gamma-Terpinene             |
| CID:31272    | Butyl acetate               |
| CID:60961    | Adenosine                   |
| CID:10878761 | Hinesol                     |
| CID:675      | 5,6-Dimethylbenzimidazole   |
| CID:676946   | p-Coumaric acid ethyl ester |
| CID:7362     | Furfural                    |

|              |                                  |
|--------------|----------------------------------|
| CID:460      | Guaiacol                         |
| CID:6885     | Phthalide                        |
| CID:5280794  | Stigmasterol                     |
| CID:5541     | Triacetin                        |
| CID:5281426  | Umbelliferone                    |
| CID:5283345  | 2-Decenal                        |
| CID:442353   | beta-Chamigrene                  |
| CID:5283316  | 2-Heptenal                       |
| CID:5283356  | 2-Undecenal                      |
| CID:3080635  | Atractylon                       |
| CID:5321047  | Atractylodin                     |
| CID:10012964 | Atractylodinol                   |
| CID:10929902 | Atractyloside I                  |
| CID:71448957 | Atractyloside G                  |
| CID:71307451 | Atractyloside A                  |
| CID:12366272 | Cirsiumaldehyde                  |
| CID:14079045 | Icariside F2                     |
| CID:71448952 | Atractyloside B                  |
| CID:71448953 | Atractyloside C                  |
| CID:71448954 | Atractyloside D                  |
| CID:71448955 | Atractyloside E                  |
| CID:12138536 | $\alpha$ -Hexylcinnamaldehyde    |
| CID:10353528 | Agarospinol                      |
| CID:1549992  | Bisabolol                        |
| CID:71448961 | 3beta-Hydroxyatractylon          |
| CID:78249    | Limonene                         |
| CID:5317844  | alpha-Guaiene                    |
| CID:3084961  | Wogonoside                       |
| CID:5321018  | Atractylenolide I                |
| CID:14420566 | Parthenolide                     |
| CID:70697841 | Gaillardin                       |
| CID:12309818 | beta-Eudesmol cis epimer         |
| CID:5356634  | Stigmastenone                    |
| CID:6429301  | (Z)-caryophyllene                |
| CID:92138    | Elemol                           |
| CID:14448070 | Atractylenolide II               |
| CID:13986099 | 3,5-Bis(tert-butyl) benzaldehyde |
| CID:6451614  | Stigmastanol                     |

---
