# Supplementary material for: Elucidation of the anti-colorectal cancer mechanism of Atractylodes lancea by network pharmacology and experimental verification
Source: publisher site journal article supplement (doi:10.18632/aging.206075), 2024-08-22
Supplement: Supplementary file [file aging-v16i16-206075-supplementary-material-SD7.pdf]

**Supplementary Table 7. Predicted targets of the potential bioactive compounds of *Atractylodes lancea* (73 genes).**

| <b>geneName</b> | <b>source</b> | <b>uniprot</b> |
|-----------------|---------------|----------------|
| CTNNB1          | DigSee        | P35222         |
| BCL2L1          | DigSee        | Q07817         |
| STAT3           | DigSee        | P40763         |
| EGFR            | DigSee        | P00533         |
| BCL2            | DigSee        | P10415         |
| HIF1A           | DigSee        | Q16665         |
| MMP9            | DigSee        | P14780         |
| VEGFA           | DigSee        | P15692         |
| NFKB1           | DigSee        | P19838         |
| SERPINE1        | DigSee        | P05121         |
| IL10            | DigSee        | P22301         |
| ABCB1           | DigSee        | P08183         |
| CDKN1A          | DigSee        | P38936         |
| MCL1            | DigSee        | Q07820         |
| GSK3B           | DigSee        | P49841         |
| BAX             | DigSee        | Q07812         |
| UCHL1           | DigSee        | P09936         |
| MET             | DigSee        | P08581         |
| ERBB2           | DigSee        | P04626         |
| CDK2            | DigSee        | P24941         |
| XDH             | DigSee        | P47989         |
| PPARA           | DigSee        | Q07869         |
| PPARD           | DigSee        | Q03181         |
| IL6             | DigSee        | P05231         |
| SPP1            | DigSee        | P10451         |
| TGFB1           | DigSee        | P01137         |
| ERCC1           | DigSee        | P07992         |
| NFKBIA          | DigSee        | P25963         |
| PGF             | DigSee        | P49763         |
| HMOX1           | DigSee        | P09601         |
| HMGB1           | DigSee        | P09429         |
| BMP4            | DigSee        | P12644         |
| ICAM1           | DigSee        | P05362         |
| MAPK3           | DigSee        | P27361         |
| FOS             | DigSee        | P01100         |
| MAPK1           | DigSee        | P28482         |
| INSR            | DigSee        | P06213         |
| FUS             | DigSee        | P35637         |
| CASP3           | DigSee        | P42574         |
| ABCG2           | DigSee        | Q9UNQ0         |
| MMP3            | DigSee        | P08254         |
| GUCA2A          | DigSee        | Q02747         |
| GSTK1           | DigSee        | Q9Y2Q3         |
| NTRK2           | DigSee        | Q16620         |
| RB1             | DigSee        | P06400         |
| CFLAR           | DigSee        | O15519         |

|         |           |        |
|---------|-----------|--------|
| CASP9   | DigSee    | P55211 |
| HMGCR   | DigSee    | P04035 |
| IL1A    | DigSee    | P01583 |
| AHR     | DigSee    | P35869 |
| SOAT1   | DigSee    | P35610 |
| UCP2    | DigSee    | P55851 |
| PTN     | DigSee    | P21246 |
| BBC3    | OMIM      | Q9BXH1 |
| UGT1A6  | GeneCards | P19224 |
| MMP13   | GeneCards | P45452 |
| TBK1    | GeneCards | Q9UHD2 |
| LBP     | GeneCards | P18428 |
| AGTR2   | GeneCards | P50052 |
| PRKCE   | GeneCards | Q02156 |
| UCP1    | GeneCards | P25874 |
| CCL26   | GeneCards | Q9Y258 |
| PRKCD   | GeneCards | Q05655 |
| NEDD4L  | GeneCards | Q96PU5 |
| SMAD1   | GeneCards | Q15797 |
| YWHAZ   | GeneCards | P63104 |
| STAT5B  | GeneCards | P51692 |
| AQP9    | GeneCards | O43315 |
| CETP    | GeneCards | P11597 |
| CRTC2   | GeneCards | Q53ET0 |
| ADORA2A | GeneCards | P29274 |
| TRPA1   | GeneCards | O75762 |
| VRK1    | GeneCards | Q99986 |

---
