# Supplementary material for: Elucidation of the anti-colorectal cancer mechanism of Atractylodes lancea by network pharmacology and experimental verification
Source: Aging (Albany NY). 2024 Aug 22;16(16):12008–28. doi: 10.18632/aging.206075 (PMC11386916; doi:10.18632/aging.206075)
Supplement: Supplementary Table 4 [file aging-16-206075-s004.xlsx]

## Sheet: GL Wang et al. Supplementary.Ta
Supplementary Table 4. Relevant targets for colorectal cancer disease.
geneName	source
TOP2A	DigSee
PTGS2	DigSee
RAF1	DigSee
MMP7	DigSee
TP53	DigSee
ANXA2	DigSee
ST14	DigSee
TYRP1	DigSee
CTNNB1	DigSee
BCL2L1	DigSee
LGALS3	DigSee
SSTR4	DigSee
PSMA7	DigSee
IGF2	DigSee
PDXP	DigSee
FSCN1	DigSee
SOX7	DigSee
CXCR4	DigSee
EGR1	DigSee
USP4	DigSee
STAT3	DigSee
CTNNBIP1	DigSee
GYPB	DigSee
MYO7A	DigSee
VDR	DigSee
MUC1	DigSee
SRC	DigSee
EGFR	DigSee
DUT	DigSee
CD55	DigSee
IGF1	DigSee
THBS1	DigSee
APC	DigSee
PPARG	DigSee
MOB1A	DigSee
BCL2	DigSee
THBS2	DigSee
LMAN1	DigSee
HIF1A	DigSee
SMAD4	DigSee
MMP9	DigSee
CRIP3	DigSee
VEGFA	DigSee
MCM2	DigSee
BMP6	DigSee
NFKB1	DigSee
LDLR	DigSee
PIK3CG	DigSee
FGFRL1	DigSee
CD36	DigSee
KRT20	DigSee
RNASET2	DigSee
COX5A	DigSee
GSTA3	DigSee
DCC	DigSee
HGF	DigSee
VPS53	DigSee
BCL10	DigSee
SERPINE1	DigSee
PTP4A3	DigSee
TYMP	DigSee
GSTM1	DigSee
CD44	DigSee
TBXAS1	DigSee
MRC1	DigSee
LMOD1	DigSee
TNFSF10	DigSee
MAPK8	DigSee
GCNT3	DigSee
CYP2W1	DigSee
TNC	DigSee
NUAK1	DigSee
GDF15	DigSee
TYMS	DigSee
ATF3	DigSee
CCK	DigSee
CDKN1B	DigSee
EPHB2	DigSee
SMAD2	DigSee
PIK3CA	DigSee
DKK3	DigSee
FASLG	DigSee
TGOLN2	DigSee
MST1R	DigSee
PSMD9	DigSee
CCR7	DigSee
CD80	DigSee
CCL28	DigSee
NME1	DigSee
KRT7	DigSee
FGFR2	DigSee
IL10	DigSee
TGFA	DigSee
XIAP	DigSee
PTGS1	DigSee
MLH1	DigSee
ABCB1	DigSee
MSH2	DigSee
IL17A	DigSee
DMBT1	DigSee
ALOX5	DigSee
LYVE1	DigSee
CLU	DigSee
WNT1	DigSee
CARM1	DigSee
ITGB2	DigSee
LCN2	DigSee
LEF1	DigSee
PLD2	DigSee
VIM	DigSee
SRF	DigSee
MUC2	DigSee
SERPINB5	DigSee
None	DigSee
CLDN7	DigSee
NOS2	DigSee
MYC	DigSee
TXNL1	DigSee
CDX2	DigSee
CD38	DigSee
TMEM97	DigSee
CDKN1A	DigSee
FZD7	DigSee
CCKBR	DigSee
REG1A	DigSee
FHIT	DigSee
MCL1	DigSee
MMP14	DigSee
CDKN2A	DigSee
MST1	DigSee
WNT2	DigSee
CTNND1	DigSee
DPYD	DigSee
PROK1	DigSee
GUCY2C	DigSee
FAS	DigSee
PEBP1	DigSee
NRP1	DigSee
MUC12	DigSee
GSK3B	DigSee
PTPRG	DigSee
BAX	DigSee
ITGB1	DigSee
AREG	DigSee
ID1	DigSee
ANG	DigSee
HLA-G	DigSee
IGFBP3	DigSee
FABP6	DigSee
KIT	DigSee
METAP2	DigSee
SOX2	DigSee
ALCAM	DigSee
MUC13	DigSee
CDH1	DigSee
S100A4	DigSee
FAM126A	DigSee
COL18A1	DigSee
EP300	DigSee
CCL2	DigSee
MGMT	DigSee
BSG	DigSee
PNPLA8	DigSee
ETV4	DigSee
CTNNA3	DigSee
NTHL1	DigSee
CA9	DigSee
FSD1	DigSee
TDGF1	DigSee
CD74	DigSee
CEACAM5	DigSee
TGFBR1	DigSee
SELP	DigSee
KLK3	DigSee
RBM3	DigSee
BCL2L10	DigSee
CD59	DigSee
TIMP2	DigSee
AMACR	DigSee
HPSE2	DigSee
NOS3	DigSee
LAMTOR2	DigSee
KLF4	DigSee
PGR	DigSee
DNMT1	DigSee
BECN1	DigSee
IL8	DigSee
BTF3	DigSee
KLRK1	DigSee
CHEK2	DigSee
CRP	DigSee
GRP	DigSee
HTATIP2	DigSee
PDF	DigSee
HSPB1	DigSee
NAT1	DigSee
CDH17	DigSee
TACSTD2	DigSee
ATP2A2	DigSee
CDK2AP1	DigSee
DRG1	DigSee
EXTL3	DigSee
CCND1	DigSee
RUNX3	DigSee
SDC1	DigSee
UCHL1	DigSee
TIMP1	DigSee
FABP1	DigSee
GSN	DigSee
NTSR1	DigSee
TMEM8B	DigSee
FAT1	DigSee
TLR4	DigSee
TP73	DigSee
XRCC3	DigSee
BRAF	DigSee
MTHFR	DigSee
CYP1A1	DigSee
EGF	DigSee
KRAS	DigSee
OGG1	DigSee
MET	DigSee
APEX1	DigSee
IRAK2	DigSee
ADH1B	DigSee
XPA	DigSee
XRCC1	DigSee
ZFP36	DigSee
BACE2	DigSee
PLAUR	DigSee
ORC6	DigSee
LIMS1	DigSee
HLA-B	DigSee
HPGD	DigSee
PLAU	DigSee
MMP1	DigSee
CMPK1	DigSee
KCNQ1OT1	DigSee
MIR21	DigSee
SP1	DigSee
ERBB2	DigSee
CDK2	DigSee
IGFBP2	DigSee
CDX1	DigSee
PYCARD	DigSee
NSUN2	DigSee
C3orf27	DigSee
MKI67	DigSee
IGKV1-16	DigSee
LPAR3	DigSee
SPINK1	DigSee
F3	DigSee
PIN1	DigSee
EPAS1	DigSee
RP1	DigSee
BTRC	DigSee
SDHD	DigSee
CYP19A1	DigSee
MED28	DigSee
NEUROD1	DigSee
WNT11	DigSee
FAP	DigSee
MED1	DigSee
HMMR	DigSee
HECA	DigSee
ETS1	DigSee
NEO1	DigSee
HOXB7	DigSee
COL4A5	DigSee
SLCO1B3	DigSee
GATA6	DigSee
RHO	DigSee
TERT	DigSee
CTSH	DigSee
SPINT1	DigSee
TKTL1	DigSee
HLA-E	DigSee
ROBO1	DigSee
HIST3H3	DigSee
CX3CL1	DigSee
TNFRSF1A	DigSee
DKK4	DigSee
SSPN	DigSee
FXYD3	DigSee
MAN2B1	DigSee
CHFR	DigSee
FGF2	DigSee
CCS	DigSee
ACVR2A	DigSee
CCR5	DigSee
APAF1	DigSee
PTGER3	DigSee
MSH6	DigSee
PTGDR2	DigSee
TNFRSF9	DigSee
MMP25	DigSee
XDH	DigSee
WIF1	DigSee
PCNA	DigSee
EIF4EBP1	DigSee
CTSB	DigSee
HRAS	DigSee
CREBBP	DigSee
CD82	DigSee
XAF1	DigSee
MMP2	DigSee
CST3	DigSee
KDR	DigSee
ERMAP	DigSee
CDK10	DigSee
AKT1	DigSee
ST13	DigSee
PTPN6	DigSee
PPARGC1A	DigSee
SRSF5	DigSee
PPARA	DigSee
CASP6	DigSee
HSD11B1	DigSee
SOD2	DigSee
PPARD	DigSee
UNC5A	DigSee
IGFBP1	DigSee
LTF	DigSee
CALCA	DigSee
ADAM23	DigSee
BAG6	DigSee
EGLN1	DigSee
FANCB	DigSee
EPHA7	DigSee
SELE	DigSee
CAV1	DigSee
IL6	DigSee
CD209	DigSee
FES	DigSee
GNL3	DigSee
HDAC2	DigSee
IL23A	DigSee
RAC1	DigSee
GPA33	DigSee
A4GALT	DigSee
CD226	DigSee
IRS1	DigSee
SLC2A1	DigSee
FUT8	DigSee
KAT5	DigSee
ADAMTSL3	DigSee
UMPS	DigSee
MUTYH	DigSee
E2F1	DigSee
GIPC1	DigSee
SPP1	DigSee
KLK10	DigSee
SEZ6L2	DigSee
ELAVL1	DigSee
ODC1	DigSee
NTN1	DigSee
BNIP3	DigSee
CD5	DigSee
FASN	DigSee
KLF6	DigSee
AXIN1	DigSee
FLT3	DigSee
HSPA4	DigSee
PLA2G4A	DigSee
FNTB	DigSee
BPIFA4P	DigSee
IGF1R	DigSee
JUN	DigSee
SHH	DigSee
TGFB1	DigSee
ATOH1	DigSee
NCOA3	DigSee
TNFRSF10A	DigSee
STRAP	DigSee
ATG16L1	DigSee
CYP1B1	DigSee
LEPR	DigSee
PPIG	DigSee
KIAA1804	DigSee
DHFR	DigSee
ABL2	DigSee
LTBP1	DigSee
HFE	DigSee
SNRPE	DigSee
FCGR3A	DigSee
ALDH2	DigSee
PON1	DigSee
RETN	DigSee
NTRK1	DigSee
FGF10	DigSee
PTTG1	DigSee
WNT5A	DigSee
HES4	DigSee
HSP90B1	DigSee
PMS2	DigSee
SLCO2A1	DigSee
MAD2L1	DigSee
GH1	DigSee
GTF2H1	DigSee
CXCL12	DigSee
CYP7A1	DigSee
ERCC1	DigSee
ADD1	DigSee
SYNJ2	DigSee
IL18	DigSee
IL27	DigSee
GSTP1	DigSee
CASP8	DigSee
MIR146A	DigSee
CYP2E1	DigSee
NFKBIA	DigSee
XRCC5	DigSee
RAD51	DigSee
TNF	DigSee
TSPAN8	DigSee
SMAD7	DigSee
DNMT3B	DigSee
NQO1	DigSee
MTR	DigSee
AKAP10	DigSee
LCT	DigSee
XRCC4	DigSee
GCKR	DigSee
ITGA2	DigSee
XPC	DigSee
SLCO1B1	DigSee
LIN28B	DigSee
IL4	DigSee
PVR	DigSee
LEP	DigSee
ERBB4	DigSee
ADIPOQ	DigSee
GATA2	DigSee
CTLA4	DigSee
IL23R	DigSee
MIR27A	DigSee
DNMT3A	DigSee
MTRR	DigSee
EZH2	DigSee
MSH3	DigSee
TCF7L2	DigSee
MC4R	DigSee
RNF139	DigSee
SFRP1	DigSee
TXNIP	DigSee
CENPA	DigSee
IL2	DigSee
KRT8	DigSee
POLR2E	DigSee
NOD2	DigSee
AURKA	DigSee
EXO1	DigSee
LGALS3BP	DigSee
CX3CR1	DigSee
PROM1	DigSee
SLC7A1	DigSee
EPCAM	DigSee
CDC42	DigSee
CCNA2	DigSee
PAK1IP1	DigSee
STEAP3	DigSee
PGF	DigSee
REM1	DigSee
TK1	DigSee
PDCD1	DigSee
COMT	DigSee
HMOX1	DigSee
EDN1	DigSee
LUC7L3	DigSee
HNRNPF	DigSee
ECM1	DigSee
AQP5	DigSee
ADK	DigSee
HMGB1	DigSee
SOCS1	DigSee
HCA1	DigSee
TIMM8A	DigSee
LIMA1	DigSee
GSTO2	DigSee
BLM	DigSee
BMP4	DigSee
MTOR	DigSee
TRNG	DigSee
SDC2	DigSee
MIR342	DigSee
TF	DigSee
GCLC	DigSee
ADRA1D	DigSee
SLC4A1	DigSee
CSPP1	DigSee
ANTXRL	DigSee
GAPDH	DigSee
JUP	DigSee
MYH1	DigSee
CAD	DigSee
ESR2	DigSee
IFNA1	DigSee
MAP3K5	DigSee
WARS	DigSee
PHLPP1	DigSee
ADAM17	DigSee
CSK	DigSee
GART	DigSee
PSMB7	DigSee
SNCA	DigSee
IK	DigSee
EYA2	DigSee
GSTT1	DigSee
GPI	DigSee
ING1	DigSee
VCAM1	DigSee
CSF2RB	DigSee
ICAM1	DigSee
SGOL1	DigSee
HLTF	DigSee
PSG9	DigSee
CDH3	DigSee
HOXB13	DigSee
FKBP10	DigSee
FGF20	DigSee
MUC5AC	DigSee
ID4	DigSee
CEACAM1	DigSee
HR	DigSee
CS	DigSee
ELAC2	DigSee
UNC5C	DigSee
PSAT1	DigSee
EIF3A	DigSee
PPM1D	DigSee
ASS1	DigSee
ANGPT1	DigSee
CDK1	DigSee
SERPINF2	DigSee
TFRC	DigSee
ZHX2	DigSee
ESR1	DigSee
STK36	DigSee
ABCC2	DigSee
LCK	DigSee
F2	DigSee
NAT2	DigSee
CP	DigSee
TWSG1	DigSee
CCRN4L	DigSee
IGKV1-9	DigSee
PKHD1	DigSee
CYP1A2	DigSee
CYP2C9	DigSee
MAD2L2	DigSee
SAT1	DigSee
EPS8	DigSee
RFC2	DigSee
TLR1	DigSee
TNFAIP3	DigSee
HPS1	DigSee
FLT1	DigSee
ALX4	DigSee
MAPK3	DigSee
IL6R	DigSee
C2	DigSee
UGT1A1	DigSee
MAMLD1	DigSee
CD8A	DigSee
SELENBP1	DigSee
BCL9	DigSee
RPH3AL	DigSee
PSG2	DigSee
CCL21	DigSee
BAG1	DigSee
KITLG	DigSee
UGT1A	DigSee
EPHB4	DigSee
NRP2	DigSee
PC	DigSee
CFTR	DigSee
INPP1	DigSee
CCT2	DigSee
NR0B2	DigSee
TFF1	DigSee
CNR1	DigSee
ITGA4	DigSee
AURKB	DigSee
FOS	DigSee
EWSR1	DigSee
PPARGC1B	DigSee
PTGER1	DigSee
APLP1	DigSee
AR	DigSee
CHI3L1	DigSee
MS	DigSee
FGFR4	DigSee
DRD2	DigSee
ALKBH1	DigSee
DSG2	DigSee
MTA1	DigSee
PKM	DigSee
EPHB1	DigSee
MAPK1	DigSee
JAK3	DigSee
AVP	DigSee
NBN	DigSee
PLA2G4C	DigSee
IL12A	DigSee
MAP2K4	DigSee
ERCC2	DigSee
IL13	DigSee
BRCA1	DigSee
MLH3	DigSee
PRNP	DigSee
GPX1	DigSee
IDH1	DigSee
ABCC3	DigSee
KL	DigSee
AGT	DigSee
FEN1	DigSee
CD4	DigSee
GHR	DigSee
S100A11	DigSee
MYB	DigSee
LONRF1	DigSee
RAX	DigSee
SMUG1	DigSee
AFP	DigSee
CD14	DigSee
RXRA	DigSee
CES2	DigSee
CYP17A1	DigSee
MIR196A2	DigSee
IL12B	DigSee
EHMT2	DigSee
SULT1A1	DigSee
F5	DigSee
CAT	DigSee
FOLH1	DigSee
MDM2	DigSee
SLC19A1	DigSee
EPHX1	DigSee
HPGDS	DigSee
RAD51C	DigSee
TPST1	DigSee
LOX	DigSee
PRLHR	DigSee
GEMIN4	DigSee
RHPN2	DigSee
ADIPOR1	DigSee
PTEN	DigSee
AXIN2	DigSee
INSR	DigSee
SH2B3	DigSee
AKR1B10	DigSee
CASR	DigSee
NYS3	DigSee
TMEM132A	DigSee
FUS	DigSee
HNF4A	DigSee
CHAF1A	DigSee
TUBB	DigSee
IFNG	DigSee
RASD2	DigSee
PNPT1	DigSee
NUMBL	DigSee
PRRT2	DigSee
MAF	DigSee
CHMP2A	DigSee
HEPH	DigSee
GHRL	DigSee
PMEPA1	DigSee
NR1H4	DigSee
FRZB	DigSee
NPTX1	DigSee
PPP2R1B	DigSee
CNOT7	DigSee
MGAM	DigSee
VAT1	DigSee
SKP2	DigSee
PSME3	DigSee
C5AR1	DigSee
CCNB1	DigSee
SHC3	DigSee
GSTT2	DigSee
PRDM10	DigSee
BIRC5	DigSee
CASP3	DigSee
SMYD3	DigSee
IL1RN	DigSee
RPA1	DigSee
CBR1	DigSee
HPS4	DigSee
GRIN2D	DigSee
RPL29	DigSee
CD247	DigSee
DAPK1	DigSee
PIK3R1	DigSee
TXN	DigSee
ACF	DigSee
ABCG2	DigSee
OSMR	DigSee
TMPO	DigSee
APCDD1	DigSee
TBC1D9	DigSee
RAD50	DigSee
APC2	DigSee
NMT1	DigSee
UROD	DigSee
KIAA1199	DigSee
WNT3A	DigSee
HLA-A	DigSee
PTK2	DigSee
STARD13	DigSee
S100A6	DigSee
CTSD	DigSee
ANGPT2	DigSee
ASAH1	DigSee
GALK2	DigSee
PRKAB1	DigSee
TPBG	DigSee
ABCC1	DigSee
BGLAP	DigSee
PTGES	DigSee
SLIT2	DigSee
MIR374A	DigSee
CDK5RAP3	DigSee
CISH	DigSee
PTPRJ	DigSee
TCF4	DigSee
ACVRL1	DigSee
MIR149	DigSee
UHRF2	DigSee
CT49	DigSee
C11orf92	DigSee
SHMT1	DigSee
LIF	DigSee
COX10	DigSee
SCG5	DigSee
CD28	DigSee
F9	DigSee
CD93	DigSee
LGALS4	DigSee
WT1	DigSee
PCSK1N	DigSee
NKD2	DigSee
FOXO1	DigSee
NLRP3	DigSee
ERCC8	DigSee
CRYGD	DigSee
TGFB2	DigSee
FUT4	DigSee
MYH11	DigSee
PTHLH	DigSee
MME	DigSee
MYO3A	DigSee
IRS2	DigSee
AQP1	DigSee
SCRIB	DigSee
MMP3	DigSee
NUDT6	DigSee
TOPORS	DigSee
CDC25B	DigSee
SUMO1	DigSee
IGF2BP1	DigSee
KRT19	DigSee
CD40LG	DigSee
B3GNT8	DigSee
CXCL16	DigSee
ADH7	DigSee
PTK7	DigSee
KLF5	DigSee
HOTAIR	DigSee
IL16	DigSee
SHE	DigSee
ARL11	DigSee
CLPTM1L	DigSee
ACTR2	DigSee
GCC1	DigSee
CYP26A1	DigSee
CEACAM7	DigSee
FGF1	DigSee
DCLK1	DigSee
ATP5C1	DigSee
APOE	DigSee
TEK	DigSee
MMRN1	DigSee
FXYD5	DigSee
PLA2G2A	DigSee
CHKB	DigSee
ERBB2IP	DigSee
TEAD4	DigSee
PINX1	DigSee
ECT2	DigSee
RAB5A	DigSee
LRP1	DigSee
XBP1	DigSee
EEF1G	DigSee
GLI1	DigSee
C1GALT1C1	DigSee
ACSL4	DigSee
ITGAE	DigSee
PCBD1	DigSee
SNAI2	DigSee
EIF4E	DigSee
CST7	DigSee
ELF3	DigSee
AIM1	DigSee
CDK20	DigSee
CYP2D6	DigSee
S100A9	DigSee
RHOA	DigSee
KLF10	DigSee
SLC5A8	DigSee
EFNB3	DigSee
REG3A	DigSee
TIAM1	DigSee
RPL19	DigSee
SOD1	DigSee
PDPN	DigSee
IL11RA	DigSee
PRKD1	DigSee
FGF9	DigSee
MRE11A	DigSee
CD58	DigSee
MAPRE1	DigSee
PMS1	DigSee
CD83	DigSee
BMI1	DigSee
NAGA	DigSee
CCNB2	DigSee
MA	DigSee
SQSTM1	DigSee
VHL	DigSee
IFITM1	DigSee
SFRP2	DigSee
RECK	DigSee
USH1C	DigSee
RPL22	DigSee
ARHGAP8	DigSee
CKS1B	DigSee
SLC16A1	DigSee
TMBIM6	DigSee
FBLN1	DigSee
CR1	DigSee
GATA4	DigSee
BAMBI	DigSee
DAP	DigSee
HNRPDL	DigSee
TFF3	DigSee
PRB3	DigSee
IL2RA	DigSee
PRKCA	DigSee
LAMC2	DigSee
CEACAM3	DigSee
HOXA4	DigSee
RHBDD3	DigSee
IL5	DigSee
GMNN	DigSee
IGFBP7	DigSee
CD97	DigSee
GRM4	DigSee
MMD	DigSee
TCF7	DigSee
MIR145	DigSee
ERBB3	DigSee
MSX2	DigSee
GPR97	DigSee
POU2F3	DigSee
IL31	DigSee
HSP90AA1	DigSee
SRD5A2	DigSee
EPGN	DigSee
NGF	DigSee
MIR302A	DigSee
RACGAP1	DigSee
SOX9	DigSee
RASGRP1	DigSee
POSTN	DigSee
CD274	DigSee
IMP3	DigSee
ALDH1A1	DigSee
PSMD10	DigSee
FIGF	DigSee
IL10RB	DigSee
PLAGL1	DigSee
PXN	DigSee
UCA1	DigSee
NR2F2	DigSee
TNFRSF4	DigSee
FOXP1	DigSee
PPIL1	DigSee
MBD4	DigSee
IGSF6	DigSee
MECP2	DigSee
MAPK14	DigSee
TOP1MT	DigSee
CTNNA1	DigSee
MUC16	DigSee
SEMA3F	DigSee
MTA2	DigSee
RHOC	DigSee
PARP1	DigSee
GUCA2A	DigSee
MIR375	DigSee
THOC1	DigSee
MIF	DigSee
EIF6	DigSee
TAF8	DigSee
NONO	DigSee
PDCD4	DigSee
DHRS9	DigSee
TEPP	DigSee
DLL4	DigSee
CYP2A6	DigSee
KCNH2	DigSee
EPHA8	DigSee
OPN1MW	DigSee
CSDE1	DigSee
EPHA2	DigSee
GSTK1	DigSee
IL17RB	DigSee
44628	DigSee
FZD10	DigSee
PTGER2	DigSee
MBIP	DigSee
CLDN2	DigSee
CTTNBP2	DigSee
TOP1	DigSee
TMSB4X	DigSee
NFASC	DigSee
FBXW7	DigSee
EPHB3	DigSee
DARC	DigSee
CHD2	DigSee
FZD2	DigSee
MYOD1	DigSee
VAV3	DigSee
HSPD1P7	DigSee
ABP1	DigSee
CXCR2	DigSee
CSF1R	DigSee
PLS3	DigSee
ANXA10	DigSee
MMP11	DigSee
ALOX15	DigSee
NFAT5	DigSee
CUL2	DigSee
CD86	DigSee
POLD3	DigSee
ND2	DigSee
ROCK2	DigSee
MIR1307	DigSee
PML	DigSee
CD24	DigSee
APOA5	DigSee
ATP1A1	DigSee
PIWIL2	DigSee
ELK3	DigSee
PNN	DigSee
NHS	DigSee
CYP3A4	DigSee
GAL	DigSee
DROSHA	DigSee
TLR3	DigSee
IRF6	DigSee
YBX1	DigSee
LGR5	DigSee
PRKAR1A	DigSee
NTRK2	DigSee
HSPA5	DigSee
GNAS	DigSee
IL1B	DigSee
ABCC4	DigSee
RRM1	DigSee
ITGB3	DigSee
MLL3	DigSee
CSNK1D	DigSee
BRCA2	DigSee
CD47	DigSee
UTS2R	DigSee
ENPP1	DigSee
BMP2	DigSee
GPX4	DigSee
TOPBP1	DigSee
CCND2	DigSee
RAD18	DigSee
PDGFRB	DigSee
MIR603	DigSee
INS	DigSee
SLC16A7	DigSee
SDHC	DigSee
ACE	DigSee
PLCE1	DigSee
YAP1	DigSee
IFRD1	DigSee
POLB	DigSee
ATF1	DigSee
BCAP31	DigSee
TTF1	DigSee
HIST1H1B	DigSee
LIG4	DigSee
XRCC2	DigSee
CALR	DigSee
HEPHL1	DigSee
MACC1	DigSee
CCL17	DigSee
ADIPOR2	DigSee
COX2	DigSee
SNORD87	DigSee
MUT	DigSee
YES1	DigSee
CLDN1	DigSee
GC	DigSee
ACYP2	DigSee
RBBP4	DigSee
MAP2K7	DigSee
BARD1	DigSee
RASSF1	DigSee
RMI1	DigSee
MITF	DigSee
TNFSF4	DigSee
NCOR1	DigSee
EMD	DigSee
GCY	DigSee
BAG3	DigSee
HCFC1	DigSee
OCIAD2	DigSee
DICER1	DigSee
POLD1	DigSee
FMO3	DigSee
TNFRSF10C	DigSee
BOP1	DigSee
ADAR	DigSee
MUC3	DigSee
IL1R2	DigSee
SOX6	DigSee
CYLD	DigSee
LGALS1	DigSee
AIM2	DigSee
GJA1	DigSee
RXFP2	DigSee
APRT	DigSee
LEMD1	DigSee
APP	DigSee
RBM19	DigSee
ABCC8	DigSee
XRRA1	DigSee
GRHL1	DigSee
PLP1	DigSee
BUB1B	DigSee
GGT1	DigSee
AAVS1	DigSee
IKBKB	DigSee
NR1I2	DigSee
TAOK2	DigSee
BRS3	DigSee
PITX2	DigSee
SYN1	DigSee
ILDR1	DigSee
TGFBR2	DigSee
IGKV2D-24	DigSee
ALB	DigSee
RB1	DigSee
CXCR1	DigSee
CXCR3	DigSee
GZMB	DigSee
CA8	DigSee
ARHGEF2	DigSee
ENPP7	DigSee
CD151	DigSee
CHGA	DigSee
ERG	DigSee
RBL1	DigSee
CYLC2	DigSee
FANCA	DigSee
HPSE	DigSee
DPP4	DigSee
TLR2	DigSee
ATM	DigSee
HTLVR	DigSee
CDKN3	DigSee
SERPINB2	DigSee
NLRP1	DigSee
NCOR2	DigSee
CPEB4	DigSee
SASS6	DigSee
BIRC6	DigSee
SMC1A	DigSee
ATAD2	DigSee
NDRG2	DigSee
NAV2	DigSee
PRS	DigSee
NR3C2	DigSee
DNAI1	DigSee
GPX2	DigSee
ITSN1	DigSee
PRAC	DigSee
ATP6V0A1	DigSee
CDH13	DigSee
FAAH	DigSee
CDK4	DigSee
HOXA5	DigSee
NCOA6	DigSee
SERPINE2	DigSee
RRS1	DigSee
LETMD1	DigSee
HTC2	DigSee
MUC5B	DigSee
NCS1	DigSee
EIF2S1	DigSee
CTTN	DigSee
BUB1	DigSee
TUBB3	DigSee
TAS2R62P	DigSee
ESRRA	DigSee
ACTN1	DigSee
TXNRD3	DigSee
NDST1	DigSee
DLG1	DigSee
HSD17B2	DigSee
SOX17	DigSee
CFLAR	DigSee
NEDD9	DigSee
HRH2	DigSee
PTS	DigSee
ROS1	DigSee
TERF2IP	DigSee
IGHM	DigSee
MFGE8	DigSee
PRSS1	DigSee
PSCA	DigSee
ELN	DigSee
DMPK	DigSee
ITGB4	DigSee
RARRES1	DigSee
CYP2C18	DigSee
SMAD3	DigSee
C12orf5	DigSee
GBGT1	DigSee
UBE2C	DigSee
SRPX	DigSee
MAGEC1	DigSee
SPINT2	DigSee
ONECUT1	DigSee
ERVW-1	DigSee
SERPINF1	DigSee
EDEM1	DigSee
WG	DigSee
FAM84A	DigSee
COL1A2	DigSee
COX1	DigSee
CTRC	DigSee
TWIST2	DigSee
RARRES3	DigSee
LATS2	DigSee
HDAC1	DigSee
TARBP2	DigSee
KLF8	DigSee
TP53BP1	DigSee
AGER	DigSee
ST7-OT4	DigSee
TCF21	DigSee
44813	DigSee
EIF4A2	DigSee
DLC1	DigSee
MIR34A	DigSee
RNF41	DigSee
C4A	DigSee
YY1AP1	DigSee
NEK11	DigSee
MYD88	DigSee
PRPS1	DigSee
KCNA2	DigSee
AKT2	DigSee
TAPT1	DigSee
FUT3	DigSee
NFE2L2	DigSee
PTCH1	DigSee
RBM15	DigSee
FPR1	DigSee
UGT1A7	DigSee
NT5C2	DigSee
C9orf3	DigSee
VEGFC	DigSee
BIRC3	DigSee
FGA	DigSee
AP3S1	DigSee
RPSA	DigSee
NGFR	DigSee
CSTB	DigSee
ST8	DigSee
STK11	DigSee
DDX6	DigSee
TSPO	DigSee
NELFCD	DigSee
RPLP2	DigSee
FLCN	DigSee
CXCL5	DigSee
POLD4	DigSee
RFC1	DigSee
TCN2	DigSee
IL17F	DigSee
ASIC2	DigSee
MCC	DigSee
TSHZ1	DigSee
SST	DigSee
TFAP2E	DigSee
UNC5B	DigSee
ATG7	DigSee
MINK1	DigSee
TLE1	DigSee
KIF11	DigSee
CLUAP1	DigSee
RIT1	DigSee
IGF2R	DigSee
FCGR1A	DigSee
UBE2Q2	DigSee
PRKDC	DigSee
TNFRSF10B	DigSee
WDHD1	DigSee
MTHFD1	DigSee
MAP2K1	DigSee
MPO	DigSee
44819	DigSee
SFRP4	DigSee
UBD	DigSee
CYP27B1	DigSee
CASP9	DigSee
TAP1	DigSee
CIITA	DigSee
CBS	DigSee
HMGCR	DigSee
MGST1	DigSee
ALOX12	DigSee
SCN1A	DigSee
RRM2B	DigSee
BCAR1	DigSee
MIR608	DigSee
IL1A	DigSee
TACR1	DigSee
LRP5	DigSee
C14orf169	DigSee
CBFA2T2	DigSee
ATP2A3	DigSee
BCAS1	DigSee
DHDDS	DigSee
PLA2G7	DigSee
ZNF331	DigSee
RHOH	DigSee
RBM4	DigSee
CXCL1	DigSee
AHRR	DigSee
TNIK	DigSee
PDAP1	DigSee
GRHL2	DigSee
WISP1	DigSee
ASTL	DigSee
HDAC9	DigSee
CD34	DigSee
HDAC6	DigSee
E2F5	DigSee
ADAMTS19	DigSee
ZAK	DigSee
PAK1	DigSee
VASH1	DigSee
ZEB1	DigSee
DDX3X	DigSee
TNKS2	DigSee
IHH	DigSee
SKI	DigSee
CD19	DigSee
VDAC1	DigSee
TKT	DigSee
EED	DigSee
FURIN	DigSee
DNASE1	DigSee
MBP	DigSee
DKK1	DigSee
CSPG4	DigSee
SFTA3	DigSee
TERC	DigSee
DIP2B	DigSee
PRKAA1	DigSee
UQCRB	DigSee
ERCC5	DigSee
XPO5	DigSee
ABCB6	DigSee
HDAC4	DigSee
CUBN	DigSee
MASP2	DigSee
LIPC	DigSee
PDK1	DigSee
STXBP2	DigSee
CYB5D2	DigSee
RET	DigSee
ERAS	DigSee
FHL2	DigSee
NOTCH2	DigSee
NABP2	DigSee
UBE2M	DigSee
GSTA1	DigSee
S100A8	DigSee
RELA	DigSee
DLG5	DigSee
CKB	DigSee
RNR2	DigSee
PRDX1	DigSee
RHOQ	DigSee
NRAS	DigSee
MIR219-1	DigSee
PPAT	DigSee
FAM101A	DigSee
GJB2	DigSee
CDKN2B-AS1	DigSee
GLYAT	DigSee
PTH	DigSee
KISS1	DigSee
IDO1	DigSee
SIRT3	DigSee
FOXL2	DigSee
FBXO24	DigSee
TSC2	DigSee
ABCC5	DigSee
PRF1	DigSee
ST6GAL1	DigSee
ZNF29P	DigSee
NF1	DigSee
AAGAB	DigSee
CCL16	DigSee
TPPP	DigSee
APCS	DigSee
PRL	DigSee
GUSB	DigSee
MAP3K1	DigSee
TWIST1	DigSee
CSF2	DigSee
MNAT1	DigSee
SMAD9	DigSee
STIM1	DigSee
TBXA2R	DigSee
EPO	DigSee
FOXO3	DigSee
SNCG	DigSee
CXCL10	DigSee
TERF1	DigSee
KRT15	DigSee
HNRNPC	DigSee
TPT1	DigSee
FOXM1	DigSee
FOXF1	DigSee
NDP	DigSee
BMPR2	DigSee
CLOCK	DigSee
EIF3H	DigSee
CTNNBL1	DigSee
PTGER4	DigSee
CASP10	DigSee
CA5A	DigSee
EFNA1	DigSee
KCNS1	DigSee
PITX1	DigSee
C11orf93	DigSee
DUSP10	DigSee
DUSP4	DigSee
POMC	DigSee
NUDT1	DigSee
PHIP	DigSee
EBM	DigSee
SPOP	DigSee
ATG5	DigSee
TNFRSF1B	DigSee
MIR31	DigSee
TGM1	DigSee
RUNX1	DigSee
PLP2	DigSee
CTBP1	DigSee
CXCR5	DigSee
ELOVL5	DigSee
RYR3	DigSee
FUT2	DigSee
CCND3	DigSee
FGFR3	DigSee
FGF7	DigSee
CRHR2	DigSee
PIM2	DigSee
MIR15A	DigSee
ZNF77	DigSee
PRRC2A	DigSee
ADRA2B	DigSee
IGFBP6	DigSee
TM4SF1	DigSee
ACPP	DigSee
THY1	DigSee
IKBKE	DigSee
TIPRL	DigSee
ETS2	DigSee
LRIG1	DigSee
SNAI1	DigSee
MYADM	DigSee
AKR7A2	DigSee
AIF1	DigSee
MARK3	DigSee
IL4R	DigSee
MTAP	DigSee
PPM1A	DigSee
POLE	DigSee
CYP2C8	DigSee
ANPEP	DigSee
MAL	DigSee
CYP20A1	DigSee
PRMT1	DigSee
FUT1	DigSee
POLG	DigSee
NFE2	DigSee
TAGLN	DigSee
CFI	DigSee
PRLR	DigSee
IQCB1	DigSee
PLEKHM1	DigSee
SMAD5	DigSee
CRYZL1	DigSee
PRKACA	DigSee
DBP	DigSee
SHC1	DigSee
AGR2	DigSee
FAF1	DigSee
PAK7	DigSee
ITGAM	DigSee
NAE1	DigSee
FER1L4	DigSee
STAT1	DigSee
HSPA9	DigSee
POU2F1	DigSee
FOXC2	DigSee
CCL24	DigSee
NES	DigSee
SERPINA1	DigSee
TOMM34	DigSee
GOLGA2	DigSee
PLK4	DigSee
CCRL2	DigSee
SERINC3	DigSee
DFNA5	DigSee
ESM1	DigSee
SATB2	DigSee
DEFB1	DigSee
RAB8A	DigSee
GAS6	DigSee
NOTCH4	DigSee
PMAIP1	DigSee
CYP27A1	DigSee
SMURF1	DigSee
SUGT1	DigSee
TDG	DigSee
CSNK2A1	DigSee
GRPR	DigSee
RTN1	DigSee
PRDM2	DigSee
C21orf2	DigSee
IL11	DigSee
ABCF1	DigSee
DDX5	DigSee
MAP3K11	DigSee
RALA	DigSee
SEPP1	DigSee
ADCY2	DigSee
REEP5	DigSee
IL10RA	DigSee
SERPINA3	DigSee
ILK	DigSee
TP63	DigSee
PLXNA1	DigSee
PSMD1	DigSee
RCAN1	DigSee
TAZ	DigSee
NEIL2	DigSee
ABCG1	DigSee
CASP7	DigSee
PER2	DigSee
UGT2B15	DigSee
CYP3A5	DigSee
AHR	DigSee
CPS1	DigSee
SCN2A	DigSee
FCGR2A	DigSee
NF2	DigSee
CTSL1	DigSee
TTK	DigSee
IARS2	DigSee
LOXL2	DigSee
MAD1L1	DigSee
DBT	DigSee
ZBTB7A	DigSee
SUZ12	DigSee
HSP90AB1	DigSee
CCNB1IP1	DigSee
ATP1A3	DigSee
SFN	DigSee
PTGIR	DigSee
NCSTN	DigSee
TNFRSF17	DigSee
PDC	DigSee
CTGF	DigSee
ARHGAP35	DigSee
GRK4	DigSee
ADCY10	DigSee
SLC4A3	DigSee
PGP	DigSee
UGT2B7	DigSee
UBC	DigSee
NKX2-1	DigSee
CRAC1	DigSee
NEDD8	DigSee
PIWIL1	DigSee
ZNF217	DigSee
ACLY	DigSee
GREM1	DigSee
MED12	DigSee
HOXB3	DigSee
GALNT12	DigSee
SRSF1	DigSee
ARSE	DigSee
CDC20	DigSee
RUNX1T1	DigSee
MBL2	DigSee
ATP2B4	DigSee
PIGK	DigSee
AMER1	DigSee
BMPR1A	DigSee
MYBL2	DigSee
TP53INP1	DigSee
NR5A2	DigSee
H2AFY2	DigSee
SLC22A18	DigSee
TMEFF2	DigSee
PLD1	DigSee
EPRS	DigSee
CHR	DigSee
CALB2	DigSee
SLC17A5	DigSee
DST	DigSee
DYM	DigSee
TPSB2	DigSee
RIPK4	DigSee
CSF3	DigSee
DVL1	DigSee
CXCL2	DigSee
CCL20	DigSee
IFNA2	DigSee
PARVG	DigSee
NTF4	DigSee
GHRH	DigSee
MTHFD2	DigSee
TRIM27	DigSee
F13A1	DigSee
DACT2	DigSee
SF3A1	DigSee
ND1	DigSee
SLC45A2	DigSee
CYR61	DigSee
IAPP	DigSee
CYP2R1	DigSee
CYP24A1	DigSee
POU5F1	DigSee
NUP88	DigSee
EPHA3	DigSee
SGK1	DigSee
PTPN13	DigSee
SATB1	DigSee
SOAT1	DigSee
EIF2AK2	DigSee
MTNR1A	DigSee
CASP8AP2	DigSee
UHRF1BP1	DigSee
POLE4	DigSee
BRD2	DigSee
CASP5	DigSee
HIST1H1A	DigSee
SLC10A2	DigSee
IGSF5	DigSee
CYP2S1	DigSee
MAP6	DigSee
ATP5A1	DigSee
MCM3	DigSee
ANXA5	DigSee
GLO1	DigSee
BCKDHB	DigSee
HOXD9	DigSee
UVRAG	DigSee
MSH5	DigSee
ASPM	DigSee
PRM1	DigSee
CDON	DigSee
F2R	DigSee
SIRT6	DigSee
SND1	DigSee
DLX4	DigSee
HPN	DigSee
RNMT	DigSee
TFF2	DigSee
CDS1	DigSee
MT3	DigSee
PIM1	DigSee
SERPINH1	DigSee
IRF8	DigSee
UBASH3B	DigSee
SLC14A2	DigSee
GPT	DigSee
CHRM1	DigSee
MXD1	DigSee
MIB1	DigSee
PIR	DigSee
RAB27A	DigSee
SLC25A5	DigSee
PLOD1	DigSee
FUCA1	DigSee
ENO2	DigSee
AGO2	DigSee
USO1	DigSee
SLC2A3	DigSee
RNH1	DigSee
BAD	DigSee
PTH1R	DigSee
GSS	DigSee
TUBA1B	DigSee
PPT1	DigSee
ZNF184	DigSee
ACTG1	DigSee
MAT1A	DigSee
EFNB2	DigSee
GADD45A	DigSee
TNFRSF11A	DigSee
RBBP8	DigSee
RGMA	DigSee
TIMP3	DigSee
IGKV5-2	DigSee
SF3B4	DigSee
PCDH8	DigSee
FZR1	DigSee
CDK5R1	DigSee
RIF1	DigSee
SSSCA1	DigSee
IGHA2	DigSee
THM	DigSee
RGS1	DigSee
IL22	DigSee
RPL4	DigSee
CTNNAL1	DigSee
NR2E3	DigSee
ETV3	DigSee
AURKAIP1	DigSee
OLIG2	DigSee
AQP4	DigSee
SSTR1	DigSee
TAB2	DigSee
TBX1	DigSee
NSMCE1	DigSee
SRP19	DigSee
EYA4	DigSee
MIR132	DigSee
GCNT2	DigSee
MIR27B	DigSee
MIR204	DigSee
CBX7	DigSee
ENOPH1	DigSee
PDIA3	DigSee
TRR	DigSee
SAFB	DigSee
PNP	DigSee
NCAM1	DigSee
PDGFRA	DigSee
RAD9A	DigSee
PTAFR	DigSee
MT1E	DigSee
FADD	DigSee
RHBDL2	DigSee
CDC25A	DigSee
SI	DigSee
HYAL2	DigSee
ECE1	DigSee
BCR	DigSee
CSMD1	DigSee
CYCS	DigSee
MFI2	DigSee
C2orf40	DigSee
KCNS3	DigSee
GATA3	DigSee
MALAT1	DigSee
SLC22A3	DigSee
FOXP3	DigSee
BCL2L11	DigSee
PTPN22	DigSee
CDT1	DigSee
TAB1	DigSee
CHEK1	DigSee
NR1H2	DigSee
TRPM7	DigSee
TSG101	DigSee
WNT6	DigSee
EFEMP1	DigSee
PF4	DigSee
PIK3CB	DigSee
C5	DigSee
LYPD4	DigSee
TRPM6	DigSee
DSP	DigSee
BCAT1	DigSee
SIRT1	DigSee
S100PBP	DigSee
KRT14	DigSee
SH2D1A	DigSee
UCP2	DigSee
HNRNPK	DigSee
IFITM3	DigSee
CES1	DigSee
SMARCA2	DigSee
VEGFB	DigSee
GAD1	DigSee
TWF1	DigSee
SPARC	DigSee
NOVA2	DigSee
DDIT3	DigSee
CST1	DigSee
APLN	DigSee
DGUOK	DigSee
H2AFX	DigSee
SHBG	DigSee
TRIM3	DigSee
GDF2	DigSee
RALBP1	DigSee
SLC16A4	DigSee
CALM1	DigSee
TSHR	DigSee
RLN2	DigSee
HIST1H3A	DigSee
FBN2	DigSee
PTGDS	DigSee
CAP1	DigSee
TXK	DigSee
MX1	DigSee
TM7SF3	DigSee
MAP1LC3A	DigSee
ARAF	DigSee
SLC5A9	DigSee
CD79A	DigSee
FSTL5	DigSee
GAL3ST2	DigSee
DPYS	DigSee
RFC3	DigSee
MYLK2	DigSee
PROS1	DigSee
PRKCB	DigSee
PPOX	DigSee
REPIN1	DigSee
NPPA	DigSee
RARB	DigSee
SLC31A1	DigSee
B3GAT1	DigSee
CYP2A7	DigSee
ITK	DigSee
ZMYND10	DigSee
PTK2B	DigSee
MIR20A	DigSee
GIPR	DigSee
RPE	DigSee
AKAP12	DigSee
PREP	DigSee
RPS19	DigSee
BPI	DigSee
KRT18	DigSee
RAB32	DigSee
SELPLG	DigSee
ISG20	DigSee
JAG1	DigSee
PTN	DigSee
HNRNPA1	DigSee
CASP4	DigSee
SIL1	DigSee
PPP1R3A	DigSee
MUC4	DigSee
SCYL1	DigSee
FGF3	DigSee
SEA	DigSee
NKD1	DigSee
BAK1	DigSee
SLC52A1	DigSee
RLN1	DigSee
AFAP1	DigSee
SALL4	DigSee
FH	DigSee
DNASE1L1	DigSee
DIABLO	DigSee
CDC73	DigSee
HSP90B3P	DigSee
MAGEA1	DigSee
PHF20	DigSee
RASA1	DigSee
ZNF384	DigSee
IRF5	DigSee
PPEF1	DigSee
POMT1	DigSee
PTGFR	DigSee
MUSK	DigSee
LBR	DigSee
REN	DigSee
TNFRSF25	DigSee
WHSC1	DigSee
SLCO6A1	DigSee
HSD3B1	DigSee
PECAM1	DigSee
MYLK3	DigSee
CDKN2B	DigSee
CYSLTR1	DigSee
UGT1A9	DigSee
ITGAV	DigSee
PRIMA1	DigSee
RPL34	DigSee
PARP4	DigSee
MSI1	DigSee
OLFM4	DigSee
TCIRG1	DigSee
MAPRE2	DigSee
GGH	DigSee
ALK	DigSee
NOTUM	DigSee
MRPS18C	DigSee
EHD2	DigSee
RRAD	DigSee
SCGB2A2	DigSee
PORCN	DigSee
NOTCH1	DigSee
GFM1	DigSee
IMMP1L	DigSee
GPR50	DigSee
PDE2A	DigSee
PLXNA2	DigSee
CSF1	DigSee
UGT1A10	DigSee
SCD	DigSee
RIPK1	DigSee
PMCH	DigSee
ZNF267	DigSee
IPMK	DigSee
LTBR	DigSee
PTPRC	DigSee
MARCKSL1	DigSee
TRNAU1AP	DigSee
ALDH9A1	DigSee
MS4A1	DigSee
EFS	DigSee
IL2RG	DigSee
SPEN	DigSee
GDE1	DigSee
DCN	DigSee
ARG1	DigSee
BMP3	DigSee
DYX1C1	DigSee
TMEM158	DigSee
BID	DigSee
ABHD5	DigSee
NR4A1	DigSee
SLPI	DigSee
PLAT	DigSee
SHOX2	DigSee
VIT	DigSee
AKAP9	DigSee
PACS1	DigSee
C21orf33	DigSee
PAPPA	DigSee
MYEF2	DigSee
UGT1A8	DigSee
CACNA1G	DigSee
RGN	DigSee
CNTROB	DigSee
SDHB	DigSee
ELL	DigSee
GNAI1	DigSee
CDA	DigSee
TRAP1	DigSee
TENM1	DigSee
LEO1	DigSee
BLVRB	DigSee
PBX2	DigSee
GAST	DigSee
MYCL1	DigSee
CAPN10	DigSee
CHRNA3	DigSee
CSHL1	DigSee
HLA-DQB1	DigSee
WDR19	DigSee
NTRK3	DigSee
CD63	DigSee
CAMK2G	DigSee
SMARCB1	DigSee
PRR3	DigSee
SERF1A	DigSee
RAPGEF1	DigSee
HPP1	DigSee
TDGF1P3	DigSee
DAZL	DigSee
HSD17B6	DigSee
ZACN	DigSee
HSPA4L	DigSee
EDA	DigSee
C3	DigSee
EFHC1	DigSee
GALC	DigSee
RANGAP1	DigSee
PPP2R1A	DigSee
TFB1M	DigSee
CD68	DigSee
HNF1A	DigSee
SCGB3A1	DigSee
SLN	DigSee
FMR1	DigSee
MAP3K14	DigSee
TP53RK	DigSee
PTCHD3	DigSee
CYGB	DigSee
TXNRD2	DigSee
RAB34	DigSee
TRG	DigSee
HOXA9	DigSee
RTKN	DigSee
GP1BA	DigSee
CYP26B1	DigSee
EPHA4	DigSee
POLR1C	DigSee
ESD	DigSee
POR	DigSee
KLK8	DigSee
CRYBB2	DigSee
PTGIS	DigSee
LRR1	DigSee
PNMA2	DigSee
ZNF253	DigSee
DHCR7	DigSee
CDK19	DigSee
NAT10	DigSee
PTENP1	DigSee
TXNRD1	DigSee
HT	DigSee
PTPRE	DigSee
CDR3	DigSee
GLB1	DigSee
GP2	DigSee
SMPD1	DigSee
MSC	DigSee
TYRO3	DigSee
MST4	DigSee
ALOX12P2	DigSee
ENAH	DigSee
LILRB4	DigSee
HADHA	DigSee
DIO2	DigSee
COCH	DigSee
MDFIC	DigSee
LPO	DigSee
AIP	DigSee
UBR5	DigSee
AMD1	DigSee
ADARB1	DigSee
ENG	DigSee
CD200	DigSee
C9	DigSee
SLC18A1	DigSee
FN1	DigSee
SDPR	DigSee
IGDCC4	DigSee
BP26	DigSee
KIR2DL1	DigSee
PLCB1	DigSee
ABI1	DigSee
TECR	DigSee
SCN9A	DigSee
PELI1	DigSee
EIF3M	DigSee
MID1	DigSee
PPP2R3A	DigSee
AP1S2	DigSee
ARHGAP9	DigSee
TSPAN31	DigSee
VIP	DigSee
HMGCS1	DigSee
CRS	DigSee
SLC2A4	DigSee
LIN9	DigSee
PTPRN2	DigSee
KRT3	DigSee
GLUL	DigSee
AFM	DigSee
ITGB6	DigSee
SLC25A31	DigSee
MBD5	DigSee
AIC	DigSee
RHD	DigSee
UPP1	DigSee
IL7R	DigSee
CARS	DigSee
TSHB	DigSee
MTX1	DigSee
[truncated: 9,537 more rows]
