# Supplementary material for: Elucidation of the anti-colorectal cancer mechanism of Atractylodes lancea by network pharmacology and experimental verification
Source: Aging (Albany NY). 2024 Aug 22;16(16):12008–28. doi: 10.18632/aging.206075 (PMC11386916; doi:10.18632/aging.206075)
Supplement: Supplementary Table 5 [file aging-16-206075-s005.xlsx]

## Sheet: GL Wang et al. Supplementary.Ta
Supplementary Table 5. Differentially expression genes of colorectal cancer in GSE164191 datasets.
Gene name	logFC	AveExpr	t	P.Value	adj.P.Val	status
PPP3R1	1.02844	11.2331	9.84302	3.51e-17	8.03e-13	Up
ADAP2	0.534862	9.5014	8.28379	1.78e-13	2.04e-09	Up
PSMD4	0.375785	11.9372	8.20822	2.68e-13	2.04e-09	Up
AP2B1	0.686783	11.0214	7.76445	2.84e-12	1.31e-08	Up
SRSF5	-0.5515	12.0405	-7.70694	3.85e-12	1.31e-08	Down
LYRM7	-0.642326	10.2657	-7.70644	3.86e-12	1.31e-08	Down
LOC283357	-0.44614	10.0089	-7.68016	4.43e-12	1.31e-08	Down
STAT3	0.728975	13.0928	7.67338	4.59e-12	1.31e-08	Up
MYBL1	-1.19671	11.1811	-7.57755	7.59e-12	1.93e-08	Down
RP5-1074L1.4	-0.546188	9.29455	-7.54554	8.97e-12	2.05e-08	Down
KLHL9	-0.556182	9.15255	-7.47244	1.31e-11	2.73e-08	Down
LOC101928852	-0.564103	8.5763	-7.4349	1.6e-11	3.04e-08	Down
RAB5C	0.664346	10.8946	7.40727	1.84e-11	3.24e-08	Up
CCNL2	-0.974985	9.30062	-7.36973	2.24e-11	3.66e-08	Down
KIAA0907	-0.420868	11.3658	-7.33345	2.71e-11	4.12e-08	Down
SNX21	0.493357	8.0924	7.30036	3.21e-11	4.59e-08	Up
RALGAPB	-0.370577	10.4128	-7.2551	4.06e-11	5.46e-08	Down
ZNF708	-0.750472	8.11147	-7.24245	4.33e-11	5.5e-08	Down
RBM8A	-1.14263	6.89709	-7.22443	4.75e-11	5.58e-08	Down
GATAD2A	0.533626	11.3352	7.21939	4.88e-11	5.58e-08	Up
BRD1	-0.494033	10.1314	-7.15032	6.96e-11	7.37e-08	Down
NDUFAF1	0.330549	9.35409	7.14655	7.09e-11	7.37e-08	Up
C1QC	1.6578	6.48902	7.06638	1.07e-10	1.06e-07	Up
EZR	-0.74736	10.5344	-6.98395	1.63e-10	1.55e-07	Down
HIST1H2BK	0.700386	13.3778	6.949	1.94e-10	1.78e-07	Up
SS18L1	-0.728725	9.08684	-6.93675	2.07e-10	1.82e-07	Down
SMAD1	0.557658	8.1217	6.92655	2.18e-10	1.84e-07	Up
RABL2A	-0.524932	9.47565	-6.88465	2.69e-10	2.2e-07	Down
STYX	-0.628926	10.2898	-6.84611	3.27e-10	2.5e-07	Down
DENND6A	-0.480613	10.8961	-6.84084	3.36e-10	2.5e-07	Down
PAPD7	-0.444646	10.6808	-6.83567	3.45e-10	2.5e-07	Down
TTC3	-1.28604	7.26601	-6.83266	3.5e-10	2.5e-07	Down
AEBP2	-0.710079	9.60151	-6.80941	3.94e-10	2.72e-07	Down
HNRNPH1	-0.56595	13.2624	-6.80353	4.06e-10	2.72e-07	Down
RPS24	-0.641874	10.7828	-6.79812	4.17e-10	2.72e-07	Down
HINT1	-0.631031	9.59696	-6.75704	5.12e-10	3.25e-07	Down
TMEM41B	-0.429485	10.7339	-6.74218	5.52e-10	3.41e-07	Down
SNHG1	-0.586477	10.9368	-6.72576	5.99e-10	3.61e-07	Down
CKAP4	0.677572	11.3012	6.71304	6.39e-10	3.65e-07	Up
AP5B1	0.477721	8.85898	6.71303	6.39e-10	3.65e-07	Up
IGIP	-0.71378	9.0456	-6.69652	6.94e-10	3.7e-07	Down
HIVEP2	-0.405345	9.45093	-6.69189	7.1e-10	3.7e-07	Down
MFSD8	-0.81134	9.46271	-6.69071	7.14e-10	3.7e-07	Down
BIRC6	-0.420937	11.2203	-6.68982	7.17e-10	3.7e-07	Down
RP11-97C16.1	-0.474256	9.52479	-6.68459	7.36e-10	3.7e-07	Down
APH1B	0.40614	9.4676	6.68268	7.43e-10	3.7e-07	Up
FICD	0.448117	8.69908	6.65837	8.39e-10	4.06e-07	Up
ALDOA	0.454002	14.4934	6.65506	8.53e-10	4.06e-07	Up
EBLN3	-0.877664	9.51525	-6.64772	8.85e-10	4.13e-07	Down
MIR4657	-0.407503	10.4797	-6.6172	1.03e-09	4.71e-07	Down
ZBTB49	-0.539674	8.54256	-6.61334	1.05e-09	4.71e-07	Down
RBM5	-0.368264	11.5349	-6.57424	1.28e-09	5.61e-07	Down
MICU1	0.515535	10.218	6.56638	1.33e-09	5.67e-07	Up
CTC-444N24.11	-0.601477	9.21427	-6.56433	1.34e-09	5.67e-07	Down
C22orf39	-0.419154	9.69259	-6.5525	1.42e-09	5.91e-07	Down
CTSZ	0.538498	11.1062	6.52634	1.62e-09	6.6e-07	Up
SNX27	0.565844	9.86112	6.51626	1.7e-09	6.73e-07	Up
SH3BP5L	0.562608	8.91198	6.51537	1.71e-09	6.73e-07	Up
RSRC2	-0.307972	10.2956	-6.50874	1.76e-09	6.84e-07	Down
ZCCHC11	-0.322265	9.92253	-6.46771	2.16e-09	8.23e-07	Down
WDR59	-0.471578	9.17173	-6.4539	2.31e-09	8.66e-07	Down
WIPF1	-0.567368	10.9647	-6.44297	2.44e-09	9e-07	Down
USP1	-0.667951	9.39112	-6.43633	2.52e-09	9.15e-07	Down
PLP2	0.533882	13.2139	6.42961	2.6e-09	9.26e-07	Up
RRN3	-0.721752	9.57799	-6.42737	2.63e-09	9.26e-07	Down
TCTA	0.37222	10.0606	6.42407	2.68e-09	9.27e-07	Up
ISG20L2	0.39455	10.7026	6.38837	3.19e-09	1.09e-06	Up
P2RY10	-0.665292	9.79357	-6.37049	3.48e-09	1.17e-06	Down
METTL3	-0.408236	10.3711	-6.36441	3.59e-09	1.19e-06	Down
KLRF1	-0.842088	11.4027	-6.3551	3.75e-09	1.21e-06	Down
MIR636	-0.560753	11.465	-6.35499	3.75e-09	1.21e-06	Down
GAPDH	0.338066	14.8013	6.34973	3.85e-09	1.22e-06	Up
LOC283588	-0.621679	8.78133	-6.32939	4.25e-09	1.33e-06	Down
THEMIS	-0.897081	8.55004	-6.30495	4.79e-09	1.48e-06	Down
LGALS1	0.429204	13.2007	6.29801	4.96e-09	1.51e-06	Up
GNA15	0.516584	9.37036	6.28974	5.16e-09	1.55e-06	Up
ABCB1	-0.543942	8.19466	-6.26906	5.71e-09	1.69e-06	Down
ITPR2	-0.669357	8.86746	-6.26336	5.87e-09	1.72e-06	Down
LRRC4	0.65076	9.58771	6.24966	6.27e-09	1.81e-06	Up
RBM28	-0.339566	9.67418	-6.24676	6.36e-09	1.82e-06	Down
KLRC4-KLRK1	-0.878361	10.9149	-6.23427	6.75e-09	1.9e-06	Down
INPP4A	-0.389171	10.0874	-6.23208	6.83e-09	1.9e-06	Down
ORMDL1	-0.62259	10.8382	-6.22736	6.98e-09	1.92e-06	Down
KIAA0930	0.469998	9.86792	6.21529	7.4e-09	2.01e-06	Up
CCNL1	-0.577847	10.9596	-6.21358	7.46e-09	2.01e-06	Down
OGT	-0.386344	11.1416	-6.20893	7.63e-09	2.03e-06	Down
MAP3K1	-0.640149	9.74229	-6.20045	7.95e-09	2.09e-06	Down
ZNF831	-0.930291	7.55642	-6.19596	8.13e-09	2.11e-06	Down
CHTF8	0.372634	11.0881	6.19305	8.24e-09	2.12e-06	Up
DESI1	0.477138	9.42499	6.16755	9.32e-09	2.37e-06	Up
CD68	0.662489	8.95858	6.15765	9.78e-09	2.44e-06	Up
PAN2	-0.583225	8.76234	-6.15669	9.82e-09	2.44e-06	Down
NAPEPLD	-0.50974	9.02651	-6.14403	1.04e-08	2.57e-06	Down
HERC1	-0.364973	11.0856	-6.14067	1.06e-08	2.58e-06	Down
NAA25	-0.538268	8.5446	-6.13141	1.11e-08	2.67e-06	Down
C14orf159	0.518178	8.88875	6.12367	1.15e-08	2.73e-06	Up
GNAI2	0.656792	12.9901	6.12251	1.16e-08	2.73e-06	Up
MRS2	-0.403207	9.05297	-6.1202	1.17e-08	2.73e-06	Down
PAN3	-0.511108	12.0011	-6.11595	1.19e-08	2.75e-06	Down
FAM133B	-0.396886	9.87906	-6.11438	1.2e-08	2.75e-06	Down
FLJ42627	0.437629	9.4676	6.11042	1.23e-08	2.78e-06	Up
ATG9A	0.610506	9.95383	6.09898	1.3e-08	2.88e-06	Up
TP53I11	1.17661	7.42894	6.0949	1.32e-08	2.88e-06	Up
PABPC1L	-0.504615	9.36952	-6.09461	1.32e-08	2.88e-06	Down
PUS7	-0.429886	8.04665	-6.09319	1.33e-08	2.88e-06	Down
MST4	-0.720588	11.2774	-6.09301	1.33e-08	2.88e-06	Down
ANKRD12	-0.810894	10.0134	-6.09032	1.35e-08	2.89e-06	Down
CLEC2D	-0.880153	8.95661	-6.08151	1.41e-08	2.98e-06	Down
TTC19	-0.471241	10.6561	-6.07931	1.42e-08	2.99e-06	Down
G6PD	0.814001	9.96963	6.06969	1.49e-08	3.1e-06	Up
PYCARD	0.497602	12.2832	6.06533	1.52e-08	3.14e-06	Up
CEP44	-0.688039	8.96854	-6.05716	1.58e-08	3.23e-06	Down
GPSM3	0.769892	12.5554	6.05146	1.63e-08	3.29e-06	Up
GSAP	-0.632357	11.2588	-6.04385	1.69e-08	3.32e-06	Down
SBDS	-0.840036	8.42318	-6.04248	1.7e-08	3.32e-06	Down
SERPINA3	1.02416	5.04336	6.04141	1.71e-08	3.32e-06	Up
NSMCE4A	-0.537922	9.23157	-6.04054	1.71e-08	3.32e-06	Down
LINC00938	-0.523553	9.28944	-6.04042	1.71e-08	3.32e-06	Down
TMEM128	-0.664125	9.46687	-6.03891	1.73e-08	3.32e-06	Down
ZNF623	-0.511181	8.37939	-6.03636	1.75e-08	3.33e-06	Down
FTH1P5	0.369525	15.7062	6.03267	1.78e-08	3.36e-06	Up
ERCC5	-0.383786	9.83881	-6.02718	1.83e-08	3.42e-06	Down
RP11-819C21.1	-0.613101	6.87539	-6.0178	1.91e-08	3.55e-06	Down
AFG3L1P	-0.49789	9.55498	-6.01501	1.94e-08	3.57e-06	Down
SPTLC2	0.396865	10.6955	6.00463	2.03e-08	3.72e-06	Up
AGL	-0.806108	9.84045	-6.00157	2.06e-08	3.74e-06	Down
AP1AR	-0.723214	8.3524	-5.98485	2.23e-08	3.99e-06	Down
USO1	-0.719292	9.08425	-5.98258	2.26e-08	3.99e-06	Down
FBXO45	-0.559159	9.53503	-5.98133	2.27e-08	3.99e-06	Down
TC2N	-0.978913	8.28398	-5.98043	2.28e-08	3.99e-06	Down
ZBTB10	-1.34827	6.00494	-5.98006	2.28e-08	3.99e-06	Down
TNPO3	0.334702	9.63411	5.97757	2.31e-08	4e-06	Up
ZNF266	-0.483831	11.0473	-5.96928	2.4e-08	4.13e-06	Down
GABARAP	0.413677	14.8256	5.96689	2.43e-08	4.14e-06	Up
CTB-31O20.2	-0.508608	9.34215	-5.96459	2.46e-08	4.14e-06	Down
MMP9	1.23082	12.0082	5.96365	2.47e-08	4.14e-06	Up
TBL1XR1	-0.633363	10.7346	-5.96283	2.48e-08	4.14e-06	Down
RP4-635E18.8	-0.442394	9.67536	-5.95513	2.57e-08	4.26e-06	Down
LOC100130987	-0.893477	8.52081	-5.95317	2.6e-08	4.27e-06	Down
SQRDL	0.46081	12.0457	5.94896	2.65e-08	4.32e-06	Up
JMY	-0.600134	9.90083	-5.94471	2.7e-08	4.38e-06	Down
MYD88	0.352989	13.7394	5.94193	2.74e-08	4.38e-06	Up
ALG13	-0.740887	9.99389	-5.94039	2.76e-08	4.38e-06	Down
FRYL	-0.845509	9.6368	-5.94015	2.76e-08	4.38e-06	Down
ATRX	-0.508557	10.8128	-5.93829	2.78e-08	4.39e-06	Down
HERC2P2	-0.480901	10.6976	-5.93157	2.87e-08	4.5e-06	Down
TRMT13	-0.862288	9.0333	-5.91626	3.09e-08	4.81e-06	Down
ENPP4	-1.10276	9.15953	-5.91263	3.14e-08	4.85e-06	Down
BTAF1	-0.601661	10.3974	-5.9116	3.16e-08	4.85e-06	Down
DOCK9	-0.871066	9.48195	-5.91023	3.18e-08	4.85e-06	Down
NIPBL	-0.43065	10.1683	-5.90711	3.23e-08	4.89e-06	Down
SETD2	-0.334014	10.5385	-5.90016	3.33e-08	5.02e-06	Down
FAM122B	-0.846761	10.1837	-5.89436	3.43e-08	5.12e-06	Down
AGPAT1	0.526115	9.96268	5.87842	3.69e-08	5.48e-06	Up
CDIPT	0.387753	13.6355	5.8762	3.73e-08	5.51e-06	Up
RP11-5C23.1	-0.659006	8.73888	-5.86972	3.85e-08	5.64e-06	Down
GPBAR1	0.623191	10.1354	5.86558	3.92e-08	5.71e-06	Up
PRPF39	-0.92722	9.10831	-5.86104	4.01e-08	5.8e-06	Down
LOC101930112	-0.450317	10.2742	-5.84285	4.37e-08	6.25e-06	Down
MYO1C	0.704804	9.04809	5.84245	4.37e-08	6.25e-06	Up
SERINC5	-0.447263	11.4464	-5.83677	4.49e-08	6.38e-06	Down
ZNF195	-0.5127	8.42755	-5.83324	4.57e-08	6.44e-06	Down
PDE8A	-0.678672	7.71611	-5.83211	4.59e-08	6.44e-06	Down
UFL1	-0.783501	9.8333	-5.82574	4.73e-08	6.59e-06	Down
P2RX5-TAX1BP3	0.351059	11.9617	5.82205	4.81e-08	6.67e-06	Up
GRAMD1C	-1.08822	7.77341	-5.81961	4.87e-08	6.7e-06	Down
MIR29B2	-0.4337	11.3408	-5.81095	5.07e-08	6.94e-06	Down
ANKRA2	-0.6183	10.1802	-5.80964	5.1e-08	6.94e-06	Down
AKAP11	-0.625774	11.2293	-5.8019	5.29e-08	7.15e-06	Down
KANSL2	-0.421969	10.1468	-5.79951	5.35e-08	7.19e-06	Down
ATP13A3	-0.593146	10.097	-5.79745	5.4e-08	7.22e-06	Down
TXK	-0.609673	9.95814	-5.79298	5.51e-08	7.31e-06	Down
TAF10	0.303271	12.7134	5.79164	5.55e-08	7.31e-06	Up
TRA2B	-0.420955	10.8315	-5.79119	5.56e-08	7.31e-06	Down
EXOSC8	-0.596436	9.83103	-5.78399	5.75e-08	7.51e-06	Down
MTR	-0.558156	9.52086	-5.78241	5.79e-08	7.52e-06	Down
RINT1	-0.616388	8.78558	-5.7813	5.82e-08	7.52e-06	Down
STK38	-0.384134	11.5763	-5.77768	5.92e-08	7.61e-06	Down
HNRNPH3	-0.368308	10.2963	-5.77146	6.1e-08	7.75e-06	Down
PTPLB	-0.48902	10.3355	-5.77024	6.13e-08	7.75e-06	Down
E2F3	0.55786	10.5354	5.77003	6.14e-08	7.75e-06	Up
ASB8	0.355584	10.3598	5.76317	6.34e-08	7.96e-06	Up
TRA2A	-0.466785	11.6997	-5.75629	6.54e-08	8.16e-06	Down
POLDIP2	0.327196	10.1841	5.75494	6.58e-08	8.16e-06	Up
CYBA	0.322834	14.4221	5.75422	6.61e-08	8.16e-06	Up
ZNF260	-0.531905	8.29903	-5.75118	6.7e-08	8.23e-06	Down
RP11-285F7.2	-0.55398	9.25122	-5.74985	6.74e-08	8.24e-06	Down
OFD1	-0.425868	10.9698	-5.74804	6.8e-08	8.27e-06	Down
UXS1	-0.40395	10.2875	-5.74441	6.91e-08	8.36e-06	Down
LOC101927933	-0.44404	8.59857	-5.73884	7.09e-08	8.48e-06	Down
RAB1B	0.632854	11.4985	5.7385	7.11e-08	8.48e-06	Up
COPE	0.409362	11.5378	5.73812	7.12e-08	8.48e-06	Up
TCERG1	-0.56414	10.4215	-5.73239	7.31e-08	8.64e-06	Down
SECISBP2L	-0.356575	9.45265	-5.7317	7.33e-08	8.64e-06	Down
WDR36	-0.455692	9.51377	-5.72836	7.45e-08	8.73e-06	Down
ZNF37BP	-0.485828	7.85417	-5.72111	7.7e-08	8.96e-06	Down
DDX26B	-0.430444	9.19609	-5.71998	7.74e-08	8.96e-06	Down
NUP43	-0.394804	10.7276	-5.71944	7.76e-08	8.96e-06	Down
BUB3	-0.582526	10.6606	-5.71441	7.95e-08	9.13e-06	Down
MEAF6	-0.388501	11.4824	-5.71234	8.02e-08	9.17e-06	Down
SH2D1A	-0.902281	10.1554	-5.71023	8.1e-08	9.2e-06	Down
SLC39A10	-0.542576	9.83207	-5.70962	8.13e-08	9.2e-06	Down
UBE2R2	0.498426	12.716	5.70766	8.2e-08	9.23e-06	Up
EIF4A2	-0.929625	7.54079	-5.70195	8.42e-08	9.4e-06	Down
SENP7	-1.06414	7.70694	-5.70174	8.43e-08	9.4e-06	Down
LINC00936	0.466872	10.1064	5.69763	8.59e-08	9.43e-06	Up
FAM199X	-0.401406	10.0966	-5.6971	8.61e-08	9.43e-06	Down
KIF22	-0.316949	8.80046	-5.69688	8.62e-08	9.43e-06	Down
TGFBR2	-0.52515	9.13409	-5.69683	8.62e-08	9.43e-06	Down
MTRF1	-0.913521	7.83455	-5.69053	8.88e-08	9.63e-06	Down
ZNF770	-0.611654	9.82881	-5.69035	8.88e-08	9.63e-06	Down
KDELR2	-0.392032	10.5468	-5.6883	8.97e-08	9.67e-06	Down
ANTXR2	-0.546294	8.24728	-5.68432	9.13e-08	9.81e-06	Down
GLA	0.319618	10.6463	5.67678	9.46e-08	1.01e-05	Up
CYLD	-0.456266	11.3049	-5.6718	9.68e-08	1.03e-05	Down
HNRNPA0	-0.489271	11.0111	-5.67029	9.75e-08	1.03e-05	Down
NPAT	-0.516006	10.0201	-5.66909	9.8e-08	1.03e-05	Down
PCNP	-0.733052	10.5975	-5.6659	9.95e-08	1.04e-05	Down
SLC16A6	0.36862	9.21287	5.66504	9.99e-08	1.04e-05	Up
ITGA6	-0.674962	9.33782	-5.65934	1.03e-07	1.07e-05	Down
FAM107B	-0.400574	11.8472	-5.64623	1.09e-07	1.13e-05	Down
ACAD8	-0.364032	9.93491	-5.64518	1.09e-07	1.13e-05	Down
BDP1	-0.945431	7.18965	-5.63805	1.13e-07	1.16e-05	Down
GABPA	-0.979715	7.16048	-5.63641	1.14e-07	1.16e-05	Down
ATG14	-0.372872	9.69294	-5.63189	1.16e-07	1.17e-05	Down
NDUFS7	0.312439	10.1846	5.63088	1.17e-07	1.17e-05	Up
PDS5A	-0.601888	10.6664	-5.63043	1.17e-07	1.17e-05	Down
ZNF486	0.453245	7.14288	5.63041	1.17e-07	1.17e-05	Up
NR2C1	-0.577831	8.99592	-5.62967	1.18e-07	1.17e-05	Down
UBN2	-0.30707	8.90255	-5.6293	1.18e-07	1.17e-05	Down
UBALD2	0.413626	11.2516	5.62441	1.2e-07	1.19e-05	Up
GPRASP1	-0.583534	9.23752	-5.62212	1.22e-07	1.19e-05	Down
VPS13C	-0.6093	12.0825	-5.62173	1.22e-07	1.19e-05	Down
ZBTB1	-1.36178	6.09893	-5.62151	1.22e-07	1.19e-05	Down
UBR5	-0.429334	10.3138	-5.61708	1.25e-07	1.21e-05	Down
NUDT5	-0.351766	10.1891	-5.61613	1.25e-07	1.21e-05	Down
ZBTB21	-0.713248	8.57276	-5.61254	1.27e-07	1.22e-05	Down
RP3-327A19.5	-0.711905	7.87744	-5.61242	1.27e-07	1.22e-05	Down
CBX6	0.373122	10.218	5.61026	1.28e-07	1.23e-05	Up
MIDN	0.57235	10.7855	5.60536	1.31e-07	1.25e-05	Up
GPANK1	0.376455	10.072	5.60418	1.32e-07	1.25e-05	Up
CBLB	-1.492	4.48734	-5.59861	1.36e-07	1.28e-05	Down
COG6	-0.636711	8.90992	-5.58979	1.41e-07	1.33e-05	Down
GOLGA6L4	-0.858726	8.6086	-5.58786	1.42e-07	1.33e-05	Down
ANKRD36B	-0.67579	11.2671	-5.58525	1.44e-07	1.34e-05	Down
PPIB	0.283933	13.573	5.58293	1.46e-07	1.35e-05	Up
SMC5	-0.466494	8.59213	-5.58269	1.46e-07	1.35e-05	Down
CXCL8	-1.18498	8.64205	-5.58249	1.46e-07	1.35e-05	Down
ZYG11B	-0.423866	10.0335	-5.57681	1.5e-07	1.38e-05	Down
SNHG12	-0.492781	10.7716	-5.57309	1.52e-07	1.39e-05	Down
KLRC4	-1.02258	7.32202	-5.57229	1.53e-07	1.39e-05	Down
SECTM1	0.577725	11.8402	5.56968	1.55e-07	1.4e-05	Up
RRAGC	0.27634	11.3648	5.56766	1.56e-07	1.41e-05	Up
LOC101929336	-0.954862	7.76273	-5.56576	1.58e-07	1.42e-05	Down
SLMO2	-0.506493	9.60248	-5.56284	1.6e-07	1.43e-05	Down
LUC7L3	-0.608771	11.8103	-5.55836	1.63e-07	1.46e-05	Down
SRSF10	-0.710251	9.26567	-5.55605	1.65e-07	1.47e-05	Down
DMTF1	-0.424213	10.5996	-5.55106	1.69e-07	1.49e-05	Down
ERMP1	-0.481882	9.11712	-5.55101	1.69e-07	1.49e-05	Down
TOX4	0.336964	10.2208	5.54841	1.71e-07	1.5e-05	Up
DMWD	0.504149	9.14203	5.54158	1.76e-07	1.54e-05	Up
HTATSF1	-0.585132	8.10576	-5.5403	1.77e-07	1.54e-05	Down
HMG20A	-0.366125	9.53739	-5.5383	1.79e-07	1.55e-05	Down
RAB8A	0.263291	12.6329	5.53573	1.81e-07	1.57e-05	Up
RP11-391M1.4	-0.446892	8.28192	-5.5343	1.82e-07	1.57e-05	Down
THAP5	-0.712428	9.11876	-5.53311	1.83e-07	1.57e-05	Down
TMEM50B	-0.773376	9.44113	-5.52947	1.86e-07	1.59e-05	Down
ARFGEF1	-0.345831	10.3854	-5.52831	1.87e-07	1.59e-05	Down
GRPR	1.08457	7.25046	5.52763	1.88e-07	1.59e-05	Up
ZNF121	-0.513124	10.1739	-5.5247	1.9e-07	1.6e-05	Down
FUBP3	-0.529724	9.93341	-5.52426	1.9e-07	1.6e-05	Down
YES1	-0.961728	6.98397	-5.52319	1.91e-07	1.6e-05	Down
AUTS2	-0.598404	9.64065	-5.52296	1.92e-07	1.6e-05	Down
TTC39B	-0.818301	7.9292	-5.52182	1.93e-07	1.6e-05	Down
CEP85L	-0.6003	10.4634	-5.5218	1.93e-07	1.6e-05	Down
TRIB2	-0.671354	10.8206	-5.51597	1.98e-07	1.64e-05	Down
ZNF540	-1.05417	7.11635	-5.51453	1.99e-07	1.64e-05	Down
C1QA	0.75284	7.46939	5.51453	1.99e-07	1.64e-05	Up
PM20D2	-0.757596	8.88263	-5.50928	2.04e-07	1.67e-05	Down
DHRSX	0.373334	9.52165	5.50578	2.07e-07	1.69e-05	Up
ARMC1	-0.582543	10.225	-5.50424	2.09e-07	1.7e-05	Down
GOPC	-0.675182	9.37928	-5.50266	2.1e-07	1.7e-05	Down
CTC-425F1.4	0.433222	8.80735	5.50096	2.12e-07	1.71e-05	Up
HLTF	-0.538197	9.28018	-5.50061	2.12e-07	1.71e-05	Down
MITD1	-0.487987	10.083	-5.49473	2.18e-07	1.75e-05	Down
HSPD1	-0.48546	11.5457	-5.49385	2.19e-07	1.75e-05	Down
C12orf66	-0.720277	8.48034	-5.49284	2.2e-07	1.75e-05	Down
TSHZ1	-0.593935	9.28247	-5.49204	2.2e-07	1.75e-05	Down
AFTPH	0.294356	12.1861	5.49181	2.21e-07	1.75e-05	Up
SHPRH	-0.700547	9.17125	-5.48706	2.25e-07	1.78e-05	Down
ITGB1	-0.650333	11.0578	-5.48223	2.3e-07	1.8e-05	Down
WBP2	0.603684	11.4032	5.4821	2.31e-07	1.8e-05	Up
MARVELD1	0.403901	9.02712	5.4819	2.31e-07	1.8e-05	Up
RHOG	0.623632	13.5791	5.47324	2.4e-07	1.87e-05	Up
MIR4680	-0.488419	11.0615	-5.47148	2.42e-07	1.88e-05	Down
JAK1	-0.446764	11.2576	-5.4706	2.43e-07	1.88e-05	Down
BCLAF1	-0.451112	9.59057	-5.46859	2.45e-07	1.89e-05	Down
S1PR4	0.492424	11.5941	5.46581	2.48e-07	1.9e-05	Up
ASF1A	-0.692116	10.0608	-5.46514	2.49e-07	1.9e-05	Down
C1QB	1.14849	6.72744	5.46472	2.5e-07	1.9e-05	Up
ATP6V0D1	0.412354	13.5275	5.46396	2.5e-07	1.9e-05	Up
DDX20	-0.4429	9.53987	-5.46175	2.53e-07	1.91e-05	Down
ZNF700	-0.599953	9.33242	-5.46149	2.53e-07	1.91e-05	Down
TRAPPC1	0.818584	9.52429	5.45952	2.55e-07	1.92e-05	Up
TRAPPC6B	-0.557692	9.53604	-5.45904	2.56e-07	1.92e-05	Down
ARPC2	0.309385	13.9682	5.45394	2.62e-07	1.96e-05	Up
MIRLET7D	-0.947641	7.43025	-5.45152	2.65e-07	1.97e-05	Down
GBGT1	0.545837	10.7375	5.45053	2.66e-07	1.97e-05	Up
SACM1L	-0.513008	11.5067	-5.44981	2.67e-07	1.97e-05	Down
HBP1	-0.590466	7.6843	-5.44414	2.74e-07	2.01e-05	Down
LIN52	-0.487646	8.50033	-5.44412	2.74e-07	2.01e-05	Down
TBL1X	1.16268	5.62422	5.44307	2.75e-07	2.02e-05	Up
DDX59	0.368564	10.3002	5.44089	2.78e-07	2.03e-05	Up
SCML1	-1.12425	7.8302	-5.43992	2.79e-07	2.03e-05	Down
LOC100506076	-0.568129	9.33669	-5.43985	2.79e-07	2.03e-05	Down
HNRNPA3	-0.568874	9.88906	-5.43837	2.81e-07	2.03e-05	Down
RP11-199F11.2	-0.411665	8.21906	-5.43688	2.83e-07	2.04e-05	Down
PDE12	-0.519067	8.08586	-5.43506	2.85e-07	2.05e-05	Down
SIRT1	-0.518641	10.1679	-5.43262	2.88e-07	2.07e-05	Down
LOC103344931	-0.374082	8.30087	-5.43084	2.91e-07	2.08e-05	Down
KLHL20	-0.526084	8.42298	-5.42806	2.94e-07	2.1e-05	Down
IFT80	-0.966455	9.01209	-5.42462	2.99e-07	2.12e-05	Down
GRPEL2	-0.603039	9.25741	-5.42176	3.03e-07	2.14e-05	Down
CRY1	-0.748955	9.52503	-5.41878	3.07e-07	2.17e-05	Down
INTS2	-0.744548	8.31087	-5.41786	3.08e-07	2.17e-05	Down
LOC102724200	-0.336375	9.17435	-5.4154	3.12e-07	2.18e-05	Down
DMXL1	-0.891473	9.37936	-5.41522	3.12e-07	2.18e-05	Down
H2BFS	0.502709	10.8597	5.41168	3.17e-07	2.2e-05	Up
RAB22A	-0.332824	10.1425	-5.41161	3.17e-07	2.2e-05	Down
DEFB118	0.739108	5.66274	5.40825	3.22e-07	2.23e-05	Up
CSRP1	0.385535	10.4892	5.4068	3.24e-07	2.23e-05	Up
ZMYM5	-0.485752	8.99566	-5.40625	3.25e-07	2.23e-05	Down
MSRA	0.447016	10.4961	5.40568	3.26e-07	2.23e-05	Up
ITPRIPL2	0.365473	8.85499	5.40488	3.27e-07	2.23e-05	Up
NMT2	-0.55895	9.31301	-5.40466	3.27e-07	2.23e-05	Down
FAM183CP	0.567843	6.64554	5.4037	3.29e-07	2.24e-05	Up
LOC100132352	-1.10771	8.2356	-5.40001	3.34e-07	2.27e-05	Down
RBM27	-0.409286	10.7588	-5.39694	3.39e-07	2.29e-05	Down
RPAIN	-0.502147	8.50969	-5.39582	3.4e-07	2.3e-05	Down
KLHL15	-0.479446	8.94861	-5.38866	3.52e-07	2.36e-05	Down
GIMAP7	-0.515089	11.6552	-5.38668	3.55e-07	2.38e-05	Down
TIMM21	-0.552778	9.31724	-5.38496	3.57e-07	2.39e-05	Down
LOC101929240	-0.308954	12.0261	-5.38231	3.62e-07	2.4e-05	Down
GLOD4	-0.437299	10.0831	-5.38186	3.62e-07	2.4e-05	Down
ZNF558	-0.48475	9.02895	-5.38109	3.64e-07	2.4e-05	Down
EPC2	-0.420025	9.48936	-5.38068	3.64e-07	2.4e-05	Down
CKB	0.57382	8.29205	5.38053	3.65e-07	2.4e-05	Up
TMEM261	-0.673952	7.73884	-5.37717	3.7e-07	2.43e-05	Down
MYL12B	0.425466	13.7288	5.3768	3.71e-07	2.43e-05	Up
NME3	-0.758132	8.85202	-5.37377	3.76e-07	2.46e-05	Down
DCAF10	0.334802	9.70591	5.37211	3.79e-07	2.47e-05	Up
HIST1H2BD	0.621976	10.5298	5.37102	3.81e-07	2.47e-05	Up
COX18	-0.443073	9.7939	-5.37082	3.81e-07	2.47e-05	Down
YIPF3	0.468499	10.6689	5.36876	3.84e-07	2.47e-05	Up
MIB1	-0.699757	9.65173	-5.36857	3.85e-07	2.47e-05	Down
KCTD7	-1.06075	6.5506	-5.36798	3.86e-07	2.47e-05	Down
SECISBP2	-0.261067	10.0312	-5.36762	3.86e-07	2.47e-05	Down
HECTD1	-0.64723	7.88832	-5.36691	3.88e-07	2.48e-05	Down
PQLC1	0.616136	11.0492	5.36619	3.89e-07	2.48e-05	Up
IL17RA	0.508166	11.3739	5.36194	3.96e-07	2.52e-05	Up
FUT7	0.559972	10.0094	5.36036	3.99e-07	2.53e-05	Up
NUP160	-0.513371	9.19832	-5.35433	4.1e-07	2.59e-05	Down
HPSE	0.475984	10.3402	5.35246	4.14e-07	2.6e-05	Up
C5orf24	-0.698848	7.171	-5.35221	4.14e-07	2.6e-05	Down
MIR6840	-0.385018	10.1327	-5.34793	4.22e-07	2.64e-05	Down
CD63	0.325836	13.3381	5.34777	4.22e-07	2.64e-05	Up
ACTG1P4	-0.537658	8.96814	-5.34641	4.25e-07	2.65e-05	Down
CTSB	0.506804	12.8901	5.3443	4.29e-07	2.66e-05	Up
PRKACB	-0.628252	12.4697	-5.34338	4.31e-07	2.66e-05	Down
DKC1	-0.398611	10.1372	-5.34287	4.32e-07	2.66e-05	Down
PLAGL2	0.366245	8.41909	5.34269	4.32e-07	2.66e-05	Up
ZNF83	-0.843225	8.91342	-5.34016	4.37e-07	2.68e-05	Down
TNFRSF25	-0.82115	8.56249	-5.34007	4.37e-07	2.68e-05	Down
PA2G4	0.458627	10.215	5.33353	4.5e-07	2.75e-05	Up
EXOC5	-0.867848	8.10728	-5.33157	4.54e-07	2.77e-05	Down
ARHGDIA	0.568934	8.44796	5.33062	4.56e-07	2.77e-05	Up
LOC100134040	1.05821	5.60814	5.32991	4.57e-07	2.77e-05	Up
OCIAD1	-0.333985	11.3164	-5.32893	4.59e-07	2.77e-05	Down
DFFB	-0.544191	8.37357	-5.32884	4.6e-07	2.77e-05	Down
CTD-2292M16.8	-1.0854	7.59239	-5.32588	4.66e-07	2.8e-05	Down
FAM73A	-0.85617	8.47511	-5.3258	4.66e-07	2.8e-05	Down
BBS2	-0.334012	9.32999	-5.32351	4.71e-07	2.81e-05	Down
SLC30A5	-0.470474	8.71831	-5.32316	4.71e-07	2.81e-05	Down
EMD	0.37805	9.2433	5.32266	4.72e-07	2.81e-05	Up
FAM3C	-0.731935	9.73689	-5.32169	4.74e-07	2.82e-05	Down
ITGA4	-0.857488	9.85572	-5.31881	4.81e-07	2.85e-05	Down
BCKDK	0.447051	9.59878	5.31505	4.89e-07	2.89e-05	Up
ZBTB41	-0.902414	8.78089	-5.31421	4.91e-07	2.89e-05	Down
HNRNPU-AS1	-0.583476	10.8442	-5.31369	4.92e-07	2.89e-05	Down
FBXO3	-0.522403	9.43752	-5.31328	4.93e-07	2.89e-05	Down
PHF20L1	-0.554279	8.39695	-5.31241	4.95e-07	2.89e-05	Down
TBC1D15	-0.488226	10.1959	-5.31216	4.95e-07	2.89e-05	Down
S100PBP	-0.385508	10.4394	-5.31043	4.99e-07	2.9e-05	Down
GPER1	1.04449	6.47932	5.30895	5.02e-07	2.91e-05	Up
S100A4	0.274972	15.2043	5.30887	5.02e-07	2.91e-05	Up
LINC01215	-0.708362	9.60625	-5.30823	5.04e-07	2.91e-05	Down
AGTRAP	0.394185	12.3525	5.30351	5.15e-07	2.96e-05	Up
BZW1	-0.518048	11.3258	-5.29967	5.23e-07	3e-05	Down
PLIN3	0.463051	11.1347	5.29945	5.24e-07	3e-05	Up
IMPDH1	0.421442	11.9698	5.2994	5.24e-07	3e-05	Up
MTX3	-0.594159	9.40541	-5.29822	5.27e-07	3e-05	Down
HMOX1	0.465112	10.5456	5.29801	5.27e-07	3e-05	Up
FAM120A	0.462263	6.9876	5.29718	5.29e-07	3e-05	Up
PEX26	0.342436	8.71001	5.29663	5.3e-07	3e-05	Up
THOC1	-0.668733	9.41826	-5.29213	5.41e-07	3.06e-05	Down
BMI1	-0.730454	10.9264	-5.29087	5.44e-07	3.07e-05	Down
AHSA1	-0.244155	11.1945	-5.28696	5.54e-07	3.1e-05	Down
LCOR	-0.49307	10.0255	-5.28687	5.54e-07	3.1e-05	Down
PNPLA1	1.08072	5.89697	5.28684	5.54e-07	3.1e-05	Up
LEF1	-0.796972	8.54277	-5.27704	5.79e-07	3.23e-05	Down
DYNLT3	-0.558958	10.2065	-5.27662	5.8e-07	3.23e-05	Down
RBM4	-0.364984	10.5736	-5.27441	5.86e-07	3.25e-05	Down
CD28	-0.606664	9.5567	-5.27273	5.9e-07	3.27e-05	Down
KRBOX4	-0.652318	6.93288	-5.27137	5.94e-07	3.28e-05	Down
DNAAF2	-0.786721	7.99622	-5.2697	5.98e-07	3.29e-05	Down
FAM102B	-0.409645	10.2704	-5.26792	6.03e-07	3.31e-05	Down
EGFL7	0.900347	6.62922	5.26644	6.07e-07	3.33e-05	Up
ATAD1	-0.551231	10.1837	-5.26571	6.09e-07	3.33e-05	Down
UBE2Q2	-0.572046	10.2783	-5.26344	6.15e-07	3.35e-05	Down
NANS	0.332784	9.9319	5.2631	6.16e-07	3.35e-05	Up
BRAF	0.419979	8.35866	5.26108	6.21e-07	3.37e-05	Up
ZNF672	0.314333	9.71	5.25801	6.3e-07	3.41e-05	Up
TRABD2A	-0.587571	9.76002	-5.2471	6.61e-07	3.57e-05	Down
VPS36	-0.509316	10.6621	-5.24645	6.63e-07	3.57e-05	Down
GIMAP1	-0.4066	11.0358	-5.24592	6.64e-07	3.57e-05	Down
TPI1	0.306108	12.7792	5.24512	6.67e-07	3.58e-05	Up
PCF11	-0.549884	10.0026	-5.24433	6.69e-07	3.58e-05	Down
SGK494	-0.461617	7.69487	-5.24231	6.75e-07	3.6e-05	Down
RBL2	-0.38554	13.0177	-5.2419	6.76e-07	3.6e-05	Down
RP11-124L9.5	-0.879812	7.19098	-5.23567	6.95e-07	3.7e-05	Down
ENOPH1	-0.520714	9.82455	-5.23477	6.98e-07	3.7e-05	Down
RBM15	-0.573059	9.88985	-5.23328	7.03e-07	3.72e-05	Down
ZNF304	-0.391011	8.03749	-5.2304	7.12e-07	3.76e-05	Down
F5	0.748137	10.219	5.22957	7.14e-07	3.76e-05	Up
PCID2	-0.431317	10.4059	-5.22841	7.18e-07	3.77e-05	Down
NPIPA5	-0.773492	8.0176	-5.22752	7.21e-07	3.78e-05	Down
RIC8B	-0.388623	8.42517	-5.22532	7.28e-07	3.8e-05	Down
FNBP4	-0.439009	11.6453	-5.22487	7.29e-07	3.8e-05	Down
C12orf29	-0.708113	9.00156	-5.22444	7.3e-07	3.8e-05	Down
GRINA	0.716455	10.056	5.22361	7.33e-07	3.81e-05	Up
HMGN3	-0.522543	11.5108	-5.22313	7.35e-07	3.81e-05	Down
ARPC1B	0.303231	13.7757	5.22247	7.37e-07	3.81e-05	Up
PUM2	-0.555389	12.0145	-5.22125	7.41e-07	3.82e-05	Down
C5orf28	-0.441793	8.95704	-5.22064	7.43e-07	3.83e-05	Down
ANAPC4	-0.420908	10.3113	-5.21978	7.46e-07	3.83e-05	Down
2023-09-02	-0.459981	9.50794	-5.21568	7.59e-07	3.89e-05	Down
RAB43	0.510743	8.61939	5.21305	7.68e-07	3.93e-05	Up
DDX18	-0.475431	9.58901	-5.2116	7.73e-07	3.94e-05	Down
TIMP1	0.504023	12.9012	5.21133	7.74e-07	3.94e-05	Up
PSENEN	0.330755	10.797	5.2108	7.76e-07	3.94e-05	Up
ZNF518A	-0.609087	9.03173	-5.21031	7.77e-07	3.94e-05	Down
SPIN4	-0.850559	8.09967	-5.20983	7.79e-07	3.94e-05	Down
ZYX	0.745842	10.9464	5.20846	7.84e-07	3.96e-05	Up
GAS7	0.609598	10.5474	5.20339	8.02e-07	4.04e-05	Up
ADHFE1	-0.443194	8.869	-5.20288	8.03e-07	4.04e-05	Down
NCBP2	-0.44747	10.1217	-5.20232	8.05e-07	4.04e-05	Down
SMEK1	-0.305505	10.6886	-5.20057	8.12e-07	4.06e-05	Down
S1PR1	-0.448039	10.0377	-5.19867	8.18e-07	4.09e-05	Down
SOCS2	-0.614538	7.71876	-5.18835	8.56e-07	4.27e-05	Down
ZNF140	-0.613477	8.93288	-5.18744	8.6e-07	4.27e-05	Down
USF1	1.08383	7.79232	5.1844	8.71e-07	4.32e-05	Up
GCC2	-0.488061	11.2232	-5.18191	8.81e-07	4.36e-05	Down
ZNF559	-0.514326	9.21092	-5.18128	8.83e-07	4.36e-05	Down
SPG21	0.325694	10.2211	5.18076	8.85e-07	4.36e-05	Up
DUSP3	0.382234	9.67567	5.18002	8.88e-07	4.36e-05	Up
CTSH	0.296936	12.1677	5.17967	8.9e-07	4.36e-05	Up
NQO2	0.728272	11.3281	5.17943	8.91e-07	4.36e-05	Up
THUMPD3-AS1	-0.438917	9.45505	-5.17813	8.96e-07	4.37e-05	Down
NUCB1	0.563863	8.98887	5.17807	8.96e-07	4.37e-05	Up
LOC100506302	-0.4066	8.86813	-5.17734	8.99e-07	4.37e-05	Down
BC042382	0.810528	3.83054	5.1764	9.03e-07	4.38e-05	Up
PREPL	-0.596852	9.08813	-5.17574	9.05e-07	4.38e-05	Down
AMMECR1L	-0.316684	9.93769	-5.17264	9.18e-07	4.44e-05	Down
SPATA2L	0.377716	9.4021	5.17014	9.28e-07	4.47e-05	Up
KATNBL1	-0.396079	8.29209	-5.17005	9.28e-07	4.47e-05	Down
CUL5	-0.672139	10.4816	-5.16913	9.32e-07	4.48e-05	Down
GOLGA8N	-0.801412	11.6785	-5.16777	9.37e-07	4.49e-05	Down
TNRC6C	0.868444	5.40282	5.16753	9.38e-07	4.49e-05	Up
ATP5B	0.239225	13.3343	5.16497	9.49e-07	4.53e-05	Up
CDC42EP4	0.44657	8.26825	5.16251	9.59e-07	4.57e-05	Up
OR1I1	0.517386	7.87752	5.16112	9.65e-07	4.59e-05	Up
SAR1A	-0.343358	11.0415	-5.15987	9.7e-07	4.6e-05	Down
CDKN1B	-0.376185	12.9941	-5.15907	9.74e-07	4.6e-05	Down
LRRN3	-0.944732	8.88322	-5.15893	9.74e-07	4.6e-05	Down
FLJ23867	0.911173	6.408	5.15534	9.9e-07	4.67e-05	Up
RP11-53O19.3	-0.588427	8.3766	-5.15279	1e-06	4.71e-05	Down
HIST1H2BG	0.607416	8.48872	5.14977	1.01e-06	4.76e-05	Up
EXT1	0.545413	8.58654	5.14886	1.02e-06	4.77e-05	Up
SNX13	-0.548622	8.42904	-5.14789	1.02e-06	4.78e-05	Down
UBE2Q2L	-0.426621	7.52688	-5.14475	1.04e-06	4.84e-05	Down
ENOSF1	-0.511032	8.78332	-5.14106	1.05e-06	4.91e-05	Down
ZNF468	-0.476824	9.09628	-5.13946	1.06e-06	4.93e-05	Down
CAPRIN1	-0.472143	10.0325	-5.13897	1.06e-06	4.93e-05	Down
ZNF148	0.343233	11.0495	5.13706	1.07e-06	4.96e-05	Up
KLRB1	-0.801839	11.1787	-5.1332	1.09e-06	5.03e-05	Down
ZNF600	-0.694387	10.0536	-5.13287	1.09e-06	5.03e-05	Down
PEBP1	-0.4225	9.9462	-5.13235	1.09e-06	5.04e-05	Down
CYP4V2	-0.415865	8.90102	-5.13167	1.1e-06	5.04e-05	Down
MZT1	-0.745104	8.35513	-5.13	1.11e-06	5.07e-05	Down
HIST2H2AA3	0.596735	13.548	5.12918	1.11e-06	5.08e-05	Up
LRBA	-0.435354	10.4747	-5.12797	1.12e-06	5.09e-05	Down
SH3BGRL3	0.543557	12.9207	5.12712	1.12e-06	5.1e-05	Up
FXYD6	0.440237	9.02948	5.12404	1.14e-06	5.15e-05	Up
B3GNT8	0.552784	9.09534	5.12402	1.14e-06	5.15e-05	Up
CCDC25	-0.523131	8.31777	-5.12183	1.15e-06	5.18e-05	Down
ABCD3	-0.773428	7.31769	-5.12169	1.15e-06	5.18e-05	Down
RP5-1092A3.4	-0.538695	8.22465	-5.12107	1.15e-06	5.19e-05	Down
ICE2	-0.494712	9.5064	-5.11921	1.16e-06	5.22e-05	Down
F8A1	0.340147	11.5958	5.11764	1.17e-06	5.24e-05	Up
ZNF146	-0.723024	8.80627	-5.11336	1.19e-06	5.32e-05	Down
RBBP6	-0.474159	8.30792	-5.11289	1.19e-06	5.32e-05	Down
TIMP2	0.635487	10.138	5.11282	1.19e-06	5.32e-05	Up
TMEM263	-1.06894	8.93089	-5.11206	1.2e-06	5.33e-05	Down
NEK7	-0.679501	12.0249	-5.11174	1.2e-06	5.33e-05	Down
SHISA5	0.353225	12.8761	5.10888	1.21e-06	5.38e-05	Up
PRPF38B	-0.530865	9.49057	-5.1044	1.24e-06	5.48e-05	Down
PCGF5	-0.507057	10.5311	-5.10243	1.25e-06	5.51e-05	Down
TCF12	-0.387026	9.90269	-5.10227	1.25e-06	5.51e-05	Down
ZZZ3	-0.731389	9.02987	-5.1002	1.26e-06	5.55e-05	Down
HNRNPDL	-0.560791	10.8196	-5.09774	1.27e-06	5.6e-05	Down
RABAC1	0.280961	12.382	5.09573	1.28e-06	5.63e-05	Up
VASP	0.556933	12.4871	5.09452	1.29e-06	5.65e-05	Up
ZNF25	-0.539404	7.81231	-5.09191	1.31e-06	5.71e-05	Down
MAPKAPK2	0.458508	10.7336	5.09153	1.31e-06	5.71e-05	Up
LOC93622	-0.510729	10.1377	-5.0893	1.32e-06	5.74e-05	Down
CHORDC1	-0.577345	10.0182	-5.08924	1.32e-06	5.74e-05	Down
MAT2A	-0.229426	11.6276	-5.08843	1.33e-06	5.75e-05	Down
MED4	-0.369359	10.0749	-5.08358	1.35e-06	5.86e-05	Down
DCAF11	0.333564	10.522	5.08186	1.36e-06	5.89e-05	Up
DNAJB9	-0.722927	9.00864	-5.07963	1.38e-06	5.93e-05	Down
APPL1	-0.434539	9.19794	-5.0796	1.38e-06	5.93e-05	Down
LSM14A	-0.384328	11.3836	-5.07573	1.4e-06	6.02e-05	Down
LEPROTL1	-0.503469	11.3925	-5.07319	1.42e-06	6.08e-05	Down
METTL22	0.360107	9.40274	5.07214	1.42e-06	6.09e-05	Up
STRN3	-0.59869	8.76463	-5.07137	1.43e-06	6.1e-05	Down
TNFSF13	0.353287	11.2952	5.069	1.44e-06	6.14e-05	Up
BRCC3	-0.415338	8.43894	-5.06886	1.44e-06	6.14e-05	Down
CSK	0.392851	12.4289	5.06643	1.46e-06	6.2e-05	Up
YIF1B	0.441296	9.36303	5.05993	1.5e-06	6.36e-05	Up
HYAL1	0.600889	3.72897	5.0595	1.5e-06	6.36e-05	Up
AC007787.2	0.501149	4.37657	5.05819	1.51e-06	6.39e-05	Up
GLMN	-0.909015	7.63498	-5.05718	1.52e-06	6.4e-05	Down
TFEB	0.514699	9.26557	5.0561	1.53e-06	6.42e-05	Up
SEPHS1	-0.422065	8.87979	-5.05501	1.53e-06	6.42e-05	Down
ARL4C	-0.440922	12.1064	-5.05476	1.53e-06	6.42e-05	Down
RP11-350F4.2	-0.60751	8.08466	-5.05458	1.54e-06	6.42e-05	Down
GPD1L	-0.410165	9.43754	-5.05438	1.54e-06	6.42e-05	Down
THAP9-AS1	-0.70349	9.13118	-5.0527	1.55e-06	6.46e-05	Down
STIM2	-0.301268	9.41234	-5.051	1.56e-06	6.49e-05	Down
FPR1	0.662674	9.82799	5.05009	1.57e-06	6.51e-05	Up
FLJ31306	-0.620294	10.7357	-5.04641	1.59e-06	6.6e-05	Down
ARL11	0.499157	11.1973	5.0437	1.61e-06	6.67e-05	Up
CDC23	-0.333409	9.56302	-5.04257	1.62e-06	6.69e-05	Down
SHKBP1	0.897709	9.84707	5.03815	1.65e-06	6.8e-05	Up
ROPN1L	0.621881	9.68337	5.03563	1.67e-06	6.85e-05	Up
CUL4B	-0.472294	9.90286	-5.03557	1.67e-06	6.85e-05	Down
HOPX	0.738642	4.09758	5.03197	1.69e-06	6.95e-05	Up
RABEP1	-1.16952	6.26396	-5.03021	1.71e-06	6.99e-05	Down
MUL1	0.607433	8.70375	5.02955	1.71e-06	7e-05	Up
CENPC	-0.533545	8.97947	-5.0278	1.72e-06	7.03e-05	Down
MIR142	-0.96898	9.97215	-5.02711	1.73e-06	7.03e-05	Down
TMEM181	-0.573777	10.493	-5.02703	1.73e-06	7.03e-05	Down
RPRD1A	-0.893385	6.63924	-5.02673	1.73e-06	7.03e-05	Down
SMN1	-0.412372	8.13308	-5.02584	1.74e-06	7.05e-05	Down
SPATA5L1	0.557739	7.89307	5.02492	1.75e-06	7.06e-05	Up
CD37	0.441778	12.0912	5.02296	1.76e-06	7.1e-05	Up
CEBPD	0.4548	12.8487	5.02278	1.76e-06	7.1e-05	Up
ZC3H7B	0.631431	8.12874	5.0184	1.79e-06	7.23e-05	Up
BDH2	-0.505255	8.60062	-5.0177	1.8e-06	7.23e-05	Down
CEP192	-0.480591	8.56897	-5.01748	1.8e-06	7.23e-05	Down
LOC644656	-0.615164	7.60648	-5.00831	1.87e-06	7.51e-05	Down
B3GNT2	-0.698505	9.11109	-5.0079	1.88e-06	7.51e-05	Down
NLRP12	0.540971	10.5844	5.00502	1.9e-06	7.58e-05	Up
CCNT2	-0.754157	9.53666	-5.00484	1.9e-06	7.58e-05	Down
MATR3	-0.636275	8.42003	-5.00379	1.91e-06	7.6e-05	Down
IPO7	-0.40462	10.2025	-5.0024	1.92e-06	7.63e-05	Down
IL1A	0.482293	7.28982	5.0017	1.93e-06	7.63e-05	Up
METTL7B	0.853293	7.27768	5.00164	1.93e-06	7.63e-05	Up
KIAA1143	-0.278047	11.2346	-4.99922	1.95e-06	7.7e-05	Down
C2CD5	-0.718425	11.0223	-4.99883	1.95e-06	7.7e-05	Down
CLNS1A	-0.502434	10.9072	-4.99826	1.96e-06	7.7e-05	Down
PTPN22	-0.409389	10.1116	-4.99648	1.97e-06	7.75e-05	Down
ACOT8	0.327376	9.98961	4.98951	2.03e-06	7.97e-05	Up
GFM2	-0.393811	9.54792	-4.98926	2.03e-06	7.97e-05	Down
FCN1	0.41573	14.4028	4.98789	2.05e-06	8e-05	Up
FOXJ3	-0.287421	10.6831	-4.98642	2.06e-06	8.04e-05	Down
TMEM204	-0.554636	10.3971	-4.98503	2.07e-06	8.07e-05	Down
SRSF11	-0.769369	9.64452	-4.98219	2.1e-06	8.16e-05	Down
FAM120AOS	0.288498	9.95413	4.98174	2.1e-06	8.16e-05	Up
BIRC3	-0.92856	10.0015	-4.98132	2.11e-06	8.16e-05	Down
LY75	-0.480828	11.0242	-4.97967	2.12e-06	8.2e-05	Down
SLC7A6	-0.361663	7.85505	-4.97684	2.15e-06	8.29e-05	Down
YAF2	-0.510942	8.8215	-4.97563	2.16e-06	8.32e-05	Down
FCER1G	0.493003	13.4293	4.97374	2.17e-06	8.37e-05	Up
ARL14EP	-0.525633	9.19006	-4.97242	2.19e-06	8.41e-05	Down
PPP2R2D	-0.737291	7.7089	-4.97122	2.2e-06	8.43e-05	Down
TBC1D4	-0.540809	9.99589	-4.96915	2.22e-06	8.49e-05	Down
LAMTOR1	0.284824	12.654	4.96879	2.22e-06	8.49e-05	Up
YTHDC1	-0.314456	12.3277	-4.96756	2.23e-06	8.49e-05	Down
ILK	0.415593	11.9705	4.96742	2.23e-06	8.49e-05	Up
NOL8	-0.414169	10.2272	-4.96728	2.24e-06	8.49e-05	Down
VPS4A	0.340414	10.5314	4.96725	2.24e-06	8.49e-05	Up
TRUB1	-0.626888	8.60632	-4.96621	2.25e-06	8.51e-05	Down
MTERF2	-0.456888	8.26867	-4.96613	2.25e-06	8.51e-05	Down
SIRPB1	0.611076	10.5754	4.96545	2.25e-06	8.52e-05	Up
C3orf17	-0.428314	7.83865	-4.96359	2.27e-06	8.54e-05	Down
ATG13	0.333214	9.94516	4.96357	2.27e-06	8.54e-05	Up
C7orf55-LUC7L2	-0.386718	8.98464	-4.96333	2.27e-06	8.54e-05	Down
MSANTD2	-0.483722	8.72893	-4.96332	2.27e-06	8.54e-05	Down
TOB1	-0.538379	11.4245	-4.96014	2.31e-06	8.62e-05	Down
C9orf41	-0.960282	8.28483	-4.95987	2.31e-06	8.62e-05	Down
CTDSPL2	-0.712275	7.46725	-4.95983	2.31e-06	8.62e-05	Down
CMTR2	-0.664186	10.1073	-4.95924	2.31e-06	8.63e-05	Down
TMEM168	-0.624996	9.78346	-4.95878	2.32e-06	8.64e-05	Down
ANKRD10	-0.341103	11.2686	-4.95778	2.33e-06	8.66e-05	Down
TK2	0.30625	8.9461	4.9549	2.36e-06	8.75e-05	Up
RBAK	-1.1109	5.86338	-4.95433	2.36e-06	8.75e-05	Down
ANKRD46	-0.503036	8.5283	-4.95426	2.36e-06	8.75e-05	Down
LUC7L	-0.752113	6.35649	-4.95341	2.37e-06	8.75e-05	Down
B3GALT4	0.303368	9.99388	4.9534	2.37e-06	8.75e-05	Up
RECQL	-0.602722	9.44318	-4.95221	2.39e-06	8.78e-05	Down
TNIP1	0.471522	12.4262	4.95158	2.39e-06	8.78e-05	Up
ZDBF2	-0.74432	6.07121	-4.95146	2.39e-06	8.78e-05	Down
EIF3A	-0.412056	11.8683	-4.95086	2.4e-06	8.78e-05	Down
SLC7A7	0.369652	12.3791	4.95084	2.4e-06	8.78e-05	Up
DLG1	-0.553288	8.72845	-4.94995	2.41e-06	8.8e-05	Down
ZNF330	-0.475796	10.2059	-4.94899	2.42e-06	8.82e-05	Down
ICE1	-0.40056	10.1286	-4.94499	2.46e-06	8.96e-05	Down
PNN	-0.707175	8.84038	-4.94296	2.48e-06	9.01e-05	Down
INPP5F	-0.460378	8.78733	-4.94293	2.48e-06	9.01e-05	Down
RBM25	-0.27752	11.6662	-4.94115	2.5e-06	9.06e-05	Down
VSIG4	0.558175	7.8098	4.94076	2.5e-06	9.06e-05	Up
TRRAP	-0.395654	9.84119	-4.94053	2.51e-06	9.06e-05	Down
LOC285628	-0.995767	6.75068	-4.93981	2.51e-06	9.07e-05	Down
NNT-AS1	-0.509108	8.14105	-4.93873	2.53e-06	9.1e-05	Down
ATF7IP	0.724698	6.64304	4.93644	2.55e-06	9.16e-05	Up
AC009120.6	-0.26186	9.08908	-4.93636	2.55e-06	9.16e-05	Down
PTBP2	-0.639275	7.00872	-4.93502	2.57e-06	9.19e-05	Down
STK39	-0.501621	9.64868	-4.93495	2.57e-06	9.19e-05	Down
EIF2AK3	-0.454549	9.95696	-4.93459	2.57e-06	9.19e-05	Down
IFITM3	0.403155	15.2671	4.93395	2.58e-06	9.2e-05	Up
OSCAR	0.455327	10.2265	4.93302	2.59e-06	9.22e-05	Up
REV1	-0.357367	9.25514	-4.93248	2.59e-06	9.23e-05	Down
SF3B1	-0.423792	10.6595	-4.93147	2.61e-06	9.24e-05	Down
PCMTD2	-0.606263	11.0392	-4.93146	2.61e-06	9.24e-05	Down
ECHDC3	0.559919	9.23099	4.9287	2.64e-06	9.33e-05	Up
GSK3B	0.449458	9.39603	4.92852	2.64e-06	9.33e-05	Up
MSRB2	0.422804	11.3359	4.92762	2.65e-06	9.35e-05	Up
RP11-226L15.5	-0.666064	8.07949	-4.92663	2.66e-06	9.37e-05	Down
NCK1	-0.399125	8.98025	-4.92533	2.68e-06	9.4e-05	Down
XPOT	-0.387676	10.069	-4.92531	2.68e-06	9.4e-05	Down
FAM84B	-0.580739	8.40877	-4.92468	2.68e-06	9.41e-05	Down
AHSA2	-0.496329	9.65948	-4.92324	2.7e-06	9.45e-05	Down
GALNT12	-0.477632	8.16137	-4.91863	2.75e-06	9.62e-05	Down
NGFRAP1	0.499472	11.4178	4.91594	2.78e-06	9.68e-05	Up
FAM134A	0.430072	10.821	4.91569	2.79e-06	9.68e-05	Up
TMEM87B	-0.723659	9.41619	-4.91519	2.79e-06	9.68e-05	Down
TMEM68	-0.800351	7.11661	-4.91514	2.79e-06	9.68e-05	Down
SEMA4A	0.541895	10.5247	4.91492	2.8e-06	9.68e-05	Up
PRKRA	-0.471369	10.0041	-4.91477	2.8e-06	9.68e-05	Down
SRSF3	-0.364784	11.9054	-4.91467	2.8e-06	9.68e-05	Down
PDP2	-0.350306	8.89588	-4.91396	2.81e-06	9.7e-05	Down
LOC100996255	0.376546	9.75939	4.91153	2.84e-06	9.78e-05	Up
CTC-428G20.3	-0.405341	9.62145	-4.91093	2.84e-06	9.79e-05	Down
GPR183	-0.7246	10.9315	-4.90945	2.86e-06	9.84e-05	Down
SLC25A45	-0.764716	7.60382	-4.90627	2.9e-06	9.96e-05	Down
CTSD	0.472759	9.65691	4.90557	2.91e-06	9.98e-05	Up
WWP1	-0.618902	8.51518	-4.90493	2.92e-06	9.99e-05	Down
ITK	-0.595976	12.5752	-4.903	2.94e-06	0.000100549	Down
TMEM123	-0.618821	13.2201	-4.90111	2.97e-06	0.000101208	Down
FAM132B	1.15187	7.27326	4.89877	3e-06	0.000102067	Up
FOXC1	1.08988	5.08818	4.89837	3e-06	0.000102091	Up
ITFG3	0.366164	8.87697	4.89754	3.01e-06	0.000102299	Up
RCHY1	-0.684879	6.91576	-4.89657	3.02e-06	0.000102569	Down
MIR1304	-0.433383	10.5344	-4.89479	3.05e-06	0.000103194	Down
SMARCD3	0.57004	9.12853	4.8925	3.08e-06	0.000103981	Up
TUBE1	-0.699219	7.82093	-4.89231	3.08e-06	0.000103981	Down
GNPTAB	-0.363449	11.3926	-4.89093	3.1e-06	0.000104291	Down
CHD9	-0.603668	8.82509	-4.89091	3.1e-06	0.000104291	Down
UPF3A	-0.427392	9.58802	-4.88913	3.12e-06	0.000104926	Down
NOG	-0.766242	8.68613	-4.88803	3.14e-06	0.000105262	Down
PURA	-0.405799	11.4858	-4.88708	3.15e-06	0.000105533	Down
CAPN7	-0.602403	8.7349	-4.88507	3.17e-06	0.000106281	Down
TSSC4	0.32272	9.1216	4.88448	3.18e-06	0.000106392	Up
WDR89	-0.841859	6.9826	-4.8804	3.24e-06	0.000107958	Down
CLIP3	0.664326	5.90401	4.88035	3.24e-06	0.000107958	Up
UBLCP1	-0.364865	10.7392	-4.8784	3.27e-06	0.000108628	Down
LINS	-0.427375	10.6955	-4.8782	3.27e-06	0.000108628	Down
NFIC	0.505574	8.56773	4.87631	3.3e-06	0.000109199	Up
EAF1	-0.389073	9.68919	-4.87628	3.3e-06	0.000109199	Down
MALT1	-0.665239	9.05583	-4.87358	3.33e-06	0.000110144	Down
SPRYD3	0.44672	8.8696	4.87356	3.33e-06	0.000110144	Up
TBC1D20	-0.208979	9.73043	-4.87123	3.37e-06	0.000111076	Down
SH3BP5-AS1	-0.395747	8.95451	-4.87086	3.37e-06	0.00011109	Down
ICOS	-1.20463	6.98708	-4.87035	3.38e-06	0.000111172	Down
SH2B2	0.417531	10.3452	4.86934	3.39e-06	0.000111489	Up
KLRC1	-0.79127	9.45498	-4.86755	3.42e-06	0.000112175	Down
NELL2	-0.55898	10.8548	-4.8661	3.44e-06	0.000112705	Down
HPS3	-0.335576	11.0681	-4.86542	3.45e-06	0.000112869	Down
SCNM1	0.266035	11.3982	4.85937	3.54e-06	0.000115488	Up
DDX6	0.701628	7.46976	4.85929	3.54e-06	0.000115488	Up
GPR18	-0.53493	10.9204	-4.85872	3.55e-06	0.000115488	Down
ZNF644	-0.766808	7.54599	-4.85819	3.56e-06	0.000115488	Down
VMA21	-0.414121	11.074	-4.85801	3.56e-06	0.000115488	Down
PLOD1	0.40379	9.36262	4.85797	3.56e-06	0.000115488	Up
SPAG1	-0.50232	7.96914	-4.85562	3.6e-06	0.000116479	Down
FAM214A	-0.53937	10.5462	-4.85521	3.6e-06	0.000116517	Down
SLC38A2	-0.504984	12.0817	-4.8532	3.63e-06	0.000117345	Down
APC	-0.45293	9.44011	-4.85241	3.65e-06	0.000117571	Down
PAXIP1-AS1	-0.417429	8.61136	-4.85187	3.65e-06	0.000117674	Down
MIS12	-0.480097	9.91894	-4.84713	3.73e-06	0.000119659	Down
NRIP1	-0.477567	9.71724	-4.84668	3.74e-06	0.000119659	Down
IKBKB	-0.269058	11.3698	-4.84668	3.74e-06	0.000119659	Down
CASC3	0.315031	11.6171	4.84658	3.74e-06	0.000119659	Up
TRIM21	0.312552	11.7313	4.84548	3.75e-06	0.000120046	Up
DDHD2	-0.442552	9.39869	-4.8449	3.76e-06	0.000120169	Down
LMAN1	-1.06708	6.16376	-4.84285	3.8e-06	0.000121049	Down
C16orf80	-0.365642	10.5928	-4.84112	3.82e-06	0.000121713	Down
ZNF329	-0.47358	8.51521	-4.84089	3.83e-06	0.000121713	Down
ZNF480	-0.738834	7.20599	-4.84014	3.84e-06	0.00012193	Down
LYPD8	1.0255	4.91015	4.83967	3.85e-06	0.000122002	Up
CTDNEP1	0.519616	10.9639	4.83853	3.87e-06	0.00012242	Up
ZDHHC6	-0.180091	10.5696	-4.83757	3.88e-06	0.000122746	Down
RBM3	-0.475243	11.5345	-4.83683	3.89e-06	0.00012296	Down
OIP5-AS1	-0.229899	12.1996	-4.83513	3.92e-06	0.000123676	Down
C16orf52	-0.657062	8.22464	-4.83319	3.95e-06	0.000124516	Down
DDX55	-0.446344	7.73817	-4.83265	3.96e-06	0.000124629	Down
JDP2	0.359195	10.1955	4.83175	3.98e-06	0.00012493	Up
C10orf54	0.474619	11.8391	4.83062	4e-06	0.00012532	Up
CCT6P1	-0.449134	9.43968	-4.83036	4e-06	0.00012532	Down
CLK1	-0.751543	10.0886	-4.82831	4.04e-06	0.000126236	Down
PRKRIR	-0.559301	11.031	-4.82781	4.04e-06	0.000126237	Down
TSG101	0.264907	11.911	4.82766	4.05e-06	0.000126237	Up
KRR1	-0.454202	9.50424	-4.82602	4.08e-06	0.000126883	Down
CCAR1	-0.346524	10.5577	-4.82529	4.09e-06	0.000126883	Down
PDAP1	0.259523	9.99369	4.82525	4.09e-06	0.000126883	Up
LRRN4	0.681447	8.52635	4.82498	4.09e-06	0.000126883	Up
ZNF738	-0.52759	8.53809	-4.82483	4.1e-06	0.000126883	Down
ORAI2	0.319732	11.8679	4.82334	4.12e-06	0.000127512	Up
BC062753	-0.326502	9.08718	-4.8212	4.16e-06	0.000128493	Down
ZFAND3	0.329205	11.6728	4.81988	4.18e-06	0.000129033	Up
KDELR1	0.340015	12.2668	4.81874	4.2e-06	0.000129349	Up
ZBTB6	-0.732453	7.51441	-4.81866	4.2e-06	0.000129349	Down
ANO10	0.637432	8.31234	4.81785	4.22e-06	0.000129528	Up
LOC101928661	0.572875	7.11046	4.81769	4.22e-06	0.000129528	Up
HPS1	0.628282	10.7537	4.81601	4.25e-06	0.00013027	Up
RASGRP1	-0.586402	11.7843	-4.81407	4.29e-06	0.000131152	Down
ODF2L	-0.769609	6.95493	-4.81377	4.29e-06	0.000131152	Down
ZNF75A	-0.400735	8.89508	-4.81299	4.3e-06	0.000131408	Down
RAB9A	-0.326582	10.3467	-4.81147	4.33e-06	0.000132075	Down
RP11-489E7.4	-0.926784	7.93723	-4.81089	4.34e-06	0.00013222	Down
CCDC151	0.63217	7.61761	4.81025	4.35e-06	0.000132399	Up
EHD1	0.482265	10.6707	4.80954	4.37e-06	0.000132619	Up
GPR89A	-0.371312	9.83979	-4.80902	4.38e-06	0.000132733	Down
ABCE1	-0.619881	9.54044	-4.80854	4.39e-06	0.000132824	Down
MED23	-0.474352	10.4639	-4.807	4.41e-06	0.00013351	Down
STRIP1	-0.257203	10.0382	-4.80323	4.48e-06	0.000135296	Down
PLEKHA8	-0.69529	6.09376	-4.80321	4.49e-06	0.000135296	Down
TMEM161B	-0.669784	9.18096	-4.80284	4.49e-06	0.00013533	Down
SEPT7P2	-0.44781	7.11757	-4.80223	4.5e-06	0.000135494	Down
LRRC43	0.538927	8.32673	4.80162	4.52e-06	0.000135666	Up
ZRANB2	-0.408225	10.6059	-4.80051	4.54e-06	0.00013612	Down
BRD4	0.50002	12.5433	4.79808	4.58e-06	0.000137334	Up
DNAJB6	-0.40695	10.6647	-4.79695	4.6e-06	0.000137806	Down
DNASE1L1	0.306643	9.98139	4.79617	4.62e-06	0.00013808	Up
SEC24B	-0.421451	10.5992	-4.79549	4.63e-06	0.000138294	Down
SC5D	-0.637765	8.13567	-4.79493	4.64e-06	0.000138437	Down
GOLGA4	-0.571226	9.9988	-4.79332	4.68e-06	0.000139144	Down
PIK3C2B	-0.913865	9.04737	-4.79309	4.68e-06	0.000139144	Down
GLT1D1	0.524807	11.7985	4.79018	4.74e-06	0.000140673	Up
ZNF45	-0.586624	7.29785	-4.78927	4.76e-06	0.000141026	Down
RHEB	-0.4737	9.67954	-4.78767	4.79e-06	0.00014161	Down
PPWD1	-0.638874	9.3136	-4.78739	4.79e-06	0.00014161	Down
CMTM5	0.723901	10.0406	4.78736	4.79e-06	0.00014161	Up
TUG1	-0.250504	11.3363	-4.78697	4.8e-06	0.000141659	Down
RBM12B	-0.449033	8.05457	-4.78589	4.82e-06	0.00014212	Down
AK022030	-0.446829	10.4756	-4.78462	4.85e-06	0.00014269	Down
OR51J1	0.508857	7.50595	4.78327	4.88e-06	0.000143319	Up
2023-09-06	-0.499866	10.9863	-4.78091	4.93e-06	0.000144555	Down
CFL2	-0.644247	7.65547	-4.78029	4.94e-06	0.000144744	Down
BBIP1	-0.451478	9.2517	-4.77822	4.98e-06	0.000145817	Down
ORAI3	0.299724	10.5031	4.77767	4.99e-06	0.000145963	Up
NT5C1B-RDH14	-0.619985	9.51404	-4.77583	5.03e-06	0.000146907	Down
FBXL3	-0.576099	12.0121	-4.77538	5.04e-06	0.000146997	Down
NEDD1	-0.738545	7.74088	-4.77434	5.06e-06	0.000147447	Down
CTD-3025N20.3	-0.824513	5.95879	-4.77367	5.08e-06	0.000147674	Down
STX5	0.519961	8.18505	4.77298	5.09e-06	0.000147915	Up
LOC100289019	-0.405057	9.51979	-4.77221	5.11e-06	0.0001482	Down
ADAT2	-0.399237	7.52594	-4.77166	5.12e-06	0.000148354	Down
PCYOX1L	-0.302713	9.95516	-4.77037	5.15e-06	0.000148952	Down
CFP	0.396011	12.1665	4.77009	5.15e-06	0.000148952	Up
L3MBTL3	-0.302111	8.93681	-4.76918	5.17e-06	0.000149302	Down
UNC5D	0.956835	4.97311	4.76872	5.18e-06	0.000149302	Up
CD96	-0.779833	7.17103	-4.76863	5.18e-06	0.000149302	Down
ALG2	-0.355378	10.136	-4.76606	5.24e-06	0.000150655	Down
LIPT1	-0.528892	9.28993	-4.76587	5.24e-06	0.000150655	Down
ZNF226	-0.517538	7.63515	-4.76505	5.26e-06	0.00015098	Down
TRAM1	-0.41156	12.7651	-4.7624	5.32e-06	0.000152473	Down
RNF32	0.374396	7.36742	4.76075	5.36e-06	0.000153333	Up
SLC26A11	-0.34842	10.2076	-4.75973	5.38e-06	0.000153793	Down
WDR75	-0.521591	8.76908	-4.75778	5.43e-06	0.00015486	Down
TRIM66	0.468414	8.35653	4.75651	5.45e-06	0.000155488	Up
ENPP5	-0.608405	7.78783	-4.75525	5.48e-06	0.000156116	Down
SPTY2D1	-0.3769	10.1345	-4.75475	5.49e-06	0.000156247	Down
CALM1	0.271098	11.4915	4.75417	5.51e-06	0.00015643	Up
HIST1H2AE	0.602488	7.91737	4.75206	5.56e-06	0.000157616	Up
CENPK	-1.14924	7.74917	-4.75133	5.57e-06	0.000157903	Down
PRKX	-0.39318	10.95	-4.74994	5.61e-06	0.000158626	Down
SLC22A24	0.400583	7.08005	4.74909	5.63e-06	0.000158839	Up
MGST2	0.344718	9.70373	4.74902	5.63e-06	0.000158839	Up
FAM98A	-0.322376	9.70611	-4.74749	5.66e-06	0.000159473	Down
DANCR	-0.475942	10.1578	-4.74748	5.66e-06	0.000159473	Down
ZNF227	-0.565312	7.6852	-4.74585	5.7e-06	0.000160362	Down
PBX2	0.333092	10.6379	4.74529	5.72e-06	0.000160536	Up
TRNT1	-0.542685	8.29261	-4.7446	5.73e-06	0.000160803	Down
PRNP	-0.548273	11.4116	-4.74387	5.75e-06	0.000161093	Down
RCN2	-0.680333	8.48903	-4.74289	5.77e-06	0.000161554	Down
ILF3	-0.422327	9.41701	-4.74138	5.81e-06	0.000162379	Down
PGLYRP1	1.58613	7.50414	4.74045	5.83e-06	0.000162807	Up
ATP11C	-0.522818	9.26589	-4.73964	5.85e-06	0.000163061	Down
DDX5	-0.289379	14.7387	-4.73949	5.86e-06	0.000163061	Down
FAM127A	0.312128	11.132	4.7357	5.95e-06	0.000165429	Up
NNT	-0.48382	9.87778	-4.73545	5.95e-06	0.000165429	Down
MAP3K3	0.479796	12.2058	4.73323	6.01e-06	0.000166759	Up
SLC25A32	-0.506866	9.30886	-4.73193	6.04e-06	0.000167457	Down
TRIM59	-0.67769	8.1684	-4.73089	6.07e-06	0.000167884	Down
AMZ2	-0.202785	11.4244	-4.73074	6.07e-06	0.000167884	Down
AHNAK	-0.421507	11.7022	-4.72919	6.11e-06	0.000168766	Down
ATF1	-0.65788	8.87769	-4.72689	6.17e-06	0.000170186	Down
GPR20	0.921011	6.14119	4.72633	6.18e-06	0.000170221	Up
MGRN1	0.439107	10.1255	4.72616	6.19e-06	0.000170221	Up
KDM6B	0.657419	10.9251	4.72597	6.19e-06	0.000170221	Up
DBR1	-0.390936	9.10274	-4.72335	6.26e-06	0.000171875	Down
MTF1	0.457339	10.0666	4.72137	6.31e-06	0.000173087	Up
FAM136A	-0.345983	9.57104	-4.72072	6.33e-06	0.000173351	Down
ERMARD	-0.303397	9.03611	-4.7199	6.35e-06	0.00017373	Down
AJ420595	-0.598586	8.2242	-4.7195	6.36e-06	0.000173817	Down
WDTC1	0.447264	9.39185	4.71916	6.37e-06	0.000173853	Up
COL10A1	0.838071	6.56895	4.71767	6.41e-06	0.00017472	Up
CCDC117	-0.477847	10.1706	-4.71733	6.42e-06	0.000174763	Down
ZBTB2	-0.342232	9.37757	-4.71456	6.49e-06	0.000176576	Down
MLLT3	-0.479598	8.55232	-4.71416	6.51e-06	0.000176656	Down
COX5B	0.29128	12.3219	4.71252	6.55e-06	0.000177648	Up
EIF1AX	-0.626571	8.95247	-4.70865	6.66e-06	0.000180315	Down
AK057657	-0.415617	11.8304	-4.70586	6.73e-06	0.000181898	Down
PARP15	-0.827452	6.94672	-4.70561	6.74e-06	0.000181898	Down
TDRD3	-0.363007	8.62723	-4.70541	6.75e-06	0.000181898	Down
ITGAE	-0.302903	10.2804	-4.70538	6.75e-06	0.000181898	Down
FAM188A	-1.05046	6.77387	-4.70512	6.75e-06	0.000181898	Down
MIS18BP1	-0.647066	8.78238	-4.70452	6.77e-06	0.000182131	Down
CDA	0.616979	11.6307	4.70389	6.79e-06	0.000182367	Up
TMEM230	-0.453484	10.8079	-4.70364	6.8e-06	0.000182367	Down
NHLRC3	-0.502598	9.43147	-4.70274	6.82e-06	0.000182836	Down
ZNRF1	0.406191	9.36162	4.70123	6.86e-06	0.000183403	Up
VCPKMT	-0.585165	9.98795	-4.70116	6.87e-06	0.000183403	Down
PTPLAD1	-0.522746	8.04617	-4.70115	6.87e-06	0.000183403	Down
DQ597730	-0.426183	9.19669	-4.70008	6.9e-06	0.000184004	Down
ARL5B	-0.405403	9.92378	-4.69935	6.92e-06	0.000184343	Down
RAD52	-0.645753	7.13436	-4.69854	6.94e-06	0.000184611	Down
LMBRD2	-0.572278	10.0376	-4.69844	6.94e-06	0.000184611	Down
C1orf52	-0.460217	10.6476	-4.69743	6.97e-06	0.000185168	Down
BACH2	-0.53604	9.95507	-4.69685	6.99e-06	0.000185398	Down
E2F5	-1.10873	6.99197	-4.6951	7.04e-06	0.000186515	Down
RDX	-1.1256	5.19736	-4.69484	7.05e-06	0.000186515	Down
LRRC58	-0.423166	9.64914	-4.69277	7.11e-06	0.000187907	Down
CNPPD1	0.635035	11.8026	4.69224	7.12e-06	0.000188102	Up
SMARCAD1	-0.51258	9.08173	-4.69035	7.18e-06	0.000189357	Down
HTR5A	0.847505	4.63882	4.68896	7.22e-06	0.000190232	Up
RPLP0P1	0.776844	7.66715	4.68825	7.24e-06	0.000190572	Up
FCF1	-0.292914	10.1125	-4.68727	7.27e-06	0.000191122	Down
CDC14A	-0.702988	7.34092	-4.68663	7.29e-06	0.00019141	Down
APPL2	-0.316419	9.03339	-4.68604	7.31e-06	0.000191659	Down
APPBP2	-0.395782	9.57937	-4.6848	7.35e-06	0.000192421	Down
CPNE3	-0.415261	10.0092	-4.68444	7.36e-06	0.000192492	Down
C6orf47	0.372057	8.38755	4.68416	7.37e-06	0.000192493	Up
UBR3	-0.479294	10.1271	-4.68235	7.42e-06	0.000193718	Down
MBTPS1	-0.229882	10.4261	-4.68117	7.46e-06	0.000194445	Down
CBWD1	-0.806527	9.26625	-4.68029	7.49e-06	0.000194927	Down
LRP10	0.477751	13.5295	4.67709	7.59e-06	0.000197287	Up
CD2AP	-0.726778	9.51976	-4.67683	7.59e-06	0.000197287	Down
ROCK2	-0.269081	9.19857	-4.67445	7.67e-06	0.000199011	Down
ADAM15	0.568989	9.46742	4.67386	7.69e-06	0.000199268	Up
DROSHA	-0.298173	9.49993	-4.67088	7.78e-06	0.000201508	Down
DNAJB4	-0.514637	8.02563	-4.66603	7.94e-06	0.000205352	Down
PCNT	-0.395022	9.91917	-4.66379	8.01e-06	0.000206642	Down
TBC1D10B	0.46044	10.8217	4.66355	8.02e-06	0.000206642	Up
LOC100996782	1.11159	5.31807	4.66349	8.02e-06	0.000206642	Up
UBR1	-0.525237	9.90626	-4.66341	8.03e-06	0.000206642	Down
COIL	-0.386512	8.26597	-4.66199	8.07e-06	0.000207584	Down
BRWD1	-0.458373	7.67636	-4.66176	8.08e-06	0.000207584	Down
MAP4K4	0.488513	9.55998	4.66103	8.1e-06	0.000207831	Up
CTD-2124B8.2	-0.716835	6.72717	-4.66093	8.11e-06	0.000207831	Down
LOC100507577	-0.375406	8.84729	-4.65961	8.15e-06	0.000208735	Down
RAB5B	0.378209	10.9448	4.65849	8.19e-06	0.000209467	Up
PSMB3	0.256678	13.4533	4.65746	8.23e-06	0.000210119	Up
SEC63	-0.301541	10.1995	-4.65474	8.32e-06	0.000212253	Down
NHLRC2	-0.565599	8.6665	-4.65436	8.33e-06	0.000212349	Down
FAR1	-0.766301	8.8276	-4.65287	8.38e-06	0.000213412	Down
HSF2	-0.487173	8.78225	-4.65218	8.41e-06	0.000213783	Down
NUDT18	0.406695	8.60864	4.65173	8.42e-06	0.000213939	Up
NR1H2	0.362746	9.94622	4.65023	8.47e-06	0.000215031	Up
REEP4	0.343836	10.0598	4.64777	8.56e-06	0.00021698	Up
ZFAND1	-0.608905	8.97231	-4.64611	8.62e-06	0.000218218	Down
TSC1	-0.24239	10.334	-4.64569	8.63e-06	0.000218353	Down
MDM1	-0.542159	9.70712	-4.64449	8.68e-06	0.000219194	Down
PRMT5	0.300535	8.80689	4.64409	8.69e-06	0.000219311	Up
ZFP62	-0.437898	8.99882	-4.64328	8.72e-06	0.000219807	Down
MSH5	-0.950056	6.07717	-4.64226	8.76e-06	0.000220246	Down
ERGIC1	0.390975	11.1664	4.64226	8.76e-06	0.000220246	Up
KPNA6	0.453685	10.7691	4.64189	8.77e-06	0.000220335	Up
TMEM60	0.197066	11.0153	4.64067	8.81e-06	0.000221064	Up
IL6R	0.45938	12.6517	4.64055	8.82e-06	0.000221064	Up
SMARCA2	-0.334378	10.5346	-4.64004	8.84e-06	0.000221289	Down
MAP2K2	0.405477	11.7258	4.63952	8.86e-06	0.000221521	Up
UBE2M	0.502092	10.7743	4.63815	8.91e-06	0.000222527	Up
RRN3P3	-1.08933	6.43402	-4.63751	8.93e-06	0.000222868	Down
PPP1R2	-0.46578	10.0948	-4.63676	8.96e-06	0.000223172	Down
SLTM	-0.330761	11.031	-4.63655	8.96e-06	0.000223172	Down
FXYD3	0.403919	9.35327	4.63638	8.97e-06	0.000223172	Up
MUT	-0.396109	8.57755	-4.63611	8.98e-06	0.000223175	Down
CEP120	-0.651923	6.84232	-4.63535	9.01e-06	0.000223633	Down
SUPT3H	-0.593239	7.37656	-4.63216	9.13e-06	0.000226334	Down
ANKRD49	-0.486854	10.7749	-4.63104	9.17e-06	0.000227136	Down
ZNF155	-0.891596	5.9954	-4.63023	9.2e-06	0.000227644	Down
RP4-714D9.5	-0.727845	7.02426	-4.62965	9.22e-06	0.000227781	Down
C17orf49	0.313791	14.7937	4.62956	9.23e-06	0.000227781	Up
PIGB	-0.40235	10.618	-4.62859	9.26e-06	0.000228436	Down
ID3	-0.980836	7.72456	-4.62815	9.28e-06	0.00022861	Down
RAD17	-0.434639	9.57619	-4.62645	9.34e-06	0.000229957	Down
SH3BP5	0.299543	11.1016	4.626	9.36e-06	0.000230134	Up
ECHDC2	-0.387631	10.1835	-4.62554	9.38e-06	0.000230326	Down
NRGN	0.861401	12.4264	4.62492	9.4e-06	0.000230662	Up
ADNP	-0.356757	11.3779	-4.62444	9.42e-06	0.000230869	Down
CDC42SE2	-0.465052	11.3223	-4.62275	9.49e-06	0.000232225	Down
HDHD2	-0.354196	10.3346	-4.62129	9.54e-06	0.000233375	Down
SRA1	0.320022	10.922	4.62024	9.58e-06	0.00023413	Up
KIFC1	0.637061	4.68301	4.6186	9.65e-06	0.000235459	Up
TAF5	-0.420691	8.35258	-4.61765	9.69e-06	0.000236121	Down
SELL	0.266513	15.2167	4.61704	9.71e-06	0.000236458	Up
ZBTB11	-0.520635	10.5467	-4.61348	9.85e-06	0.000239557	Down
HIST1H2AD	0.691608	9.62784	4.61335	9.86e-06	0.000239557	Up
ZNF793	-0.621028	6.86994	-4.61182	9.92e-06	0.000240774	Down
SQSTM1	0.291143	11.6773	4.61159	9.93e-06	0.000240774	Up
THAP6	-0.44356	7.78782	-4.6088	1e-05	0.000243123	Down
RP11-488L18.10	-0.766103	9.70321	-4.6087	1e-05	0.000243123	Down
SYPL1	-0.389823	10.8273	-4.60835	1.01e-05	0.000243214	Down
TMEM11	0.224914	10.4048	4.60722	1.01e-05	0.000244086	Up
CORO2A	0.391683	8.03898	4.60601	1.02e-05	0.000244959	Up
LOC101928625	-0.424549	9.40002	-4.60574	1.02e-05	0.000244959	Down
KCTD21	0.324421	8.81165	4.60555	1.02e-05	0.000244959	Up
LINC01208	0.664722	6.80933	4.60512	1.02e-05	0.000244959	Up
C11orf48	0.234734	10.0859	4.60496	1.02e-05	0.000244959	Up
IL1RN	0.564594	12.0588	4.60446	1.02e-05	0.000244959	Up
LOC101928605	-0.707645	6.85177	-4.6044	1.02e-05	0.000244959	Down
TATDN3	-0.373298	9.36166	-4.6042	1.02e-05	0.000244959	Down
PHLPP2	-0.58854	8.27571	-4.60403	1.02e-05	0.000244959	Down
GXYLT1	-0.322232	8.51423	-4.60358	1.03e-05	0.000245159	Down
ACTN4	0.612025	10.6892	4.60216	1.03e-05	0.000246329	Up
ARHGAP12	-0.650273	8.39058	-4.60174	1.03e-05	0.000246496	Down
TMEM120A	0.407726	11.0123	4.60085	1.04e-05	0.000247139	Up
CDK7	-0.336654	9.06945	-4.60016	1.04e-05	0.000247359	Down
GMCL1	-0.422343	10.251	-4.60012	1.04e-05	0.000247359	Down
ZNF26	-0.660576	6.94516	-4.59982	1.04e-05	0.000247403	Down
NAA50	-0.564703	11.2576	-4.5989	1.05e-05	0.000248084	Down
LOC100996668	-1.37141	6.34383	-4.59794	1.05e-05	0.000248796	Down
GPR108	0.325839	11.1965	4.59638	1.06e-05	0.000250127	Up
PTGER4	-0.754109	7.74247	-4.59566	1.06e-05	0.000250611	Down
GTF3C4	0.440916	7.66832	4.59232	1.07e-05	0.000253791	Up
ETFB	0.276348	9.74353	4.5911	1.08e-05	0.000254798	Up
MRPS6	-0.291779	11.3867	-4.58827	1.09e-05	0.000257175	Down
DMRTB1	0.675021	4.97066	4.58826	1.09e-05	0.000257175	Up
FAM101B	0.471685	12.1703	4.58806	1.09e-05	0.000257175	Up
ZNF354C	-0.396016	8.71943	-4.58666	1.1e-05	0.000258197	Down
SLAMF1	-0.631524	7.89078	-4.58659	1.1e-05	0.000258197	Down
C1orf162	0.30337	12.9391	4.58606	1.1e-05	0.000258487	Up
FAM131A	0.255597	9.26342	4.58553	1.1e-05	0.000258788	Up
ASGR1	0.39732	8.64413	4.58481	1.11e-05	0.000259275	Up
CACNG6	0.592463	10.3305	4.58397	1.11e-05	0.000259909	Up
ADPRM	-0.478511	8.71061	-4.58238	1.12e-05	0.000261328	Down
ZNF213	0.476472	8.47399	4.58169	1.12e-05	0.000261588	Up
LOC157740	0.657627	6.55875	4.58164	1.12e-05	0.000261588	Up
OLAH	1.06886	5.69999	4.58051	1.13e-05	0.000262524	Up
LPCAT4	-0.274405	8.32396	-4.58016	1.13e-05	0.000262628	Down
N4BP2L2-IT2	-0.517081	8.26599	-4.57949	1.13e-05	0.000263075	Down
KLRAP1	-0.901257	6.58558	-4.57925	1.13e-05	0.000263075	Down
C10orf32	-0.52886	9.73094	-4.57686	1.14e-05	0.000265378	Down
LINC01184	-0.90339	6.84416	-4.57583	1.15e-05	0.00026623	Down
ADAM1A	-0.54769	7.61919	-4.57518	1.15e-05	0.000266658	Down
CHRM3-AS2	-0.800491	8.2497	-4.57355	1.16e-05	0.000268168	Down
BAG6	0.419713	11.6066	4.57314	1.16e-05	0.000268343	Up
ANAPC15	0.362861	8.82436	4.57275	1.16e-05	0.000268499	Up
PPM1K	-0.370866	11.2885	-4.57224	1.17e-05	0.000268786	Down
MIR1236	0.288385	9.98562	4.56907	1.18e-05	0.000271999	Up
PPIL3	-0.435477	10.012	-4.56802	1.19e-05	0.000272866	Down
CAPNS1	0.433429	13.2093	4.56755	1.19e-05	0.000272866	Up
H1F0	0.579938	8.57028	4.56755	1.19e-05	0.000272866	Up
SRP9	-0.571078	12.48	-4.56656	1.19e-05	0.000273552	Down
SGPP1	-0.936344	9.17369	-4.56644	1.19e-05	0.000273552	Down
ADAM28	-0.654307	8.89268	-4.56604	1.2e-05	0.000273726	Down
UHRF2	-0.361132	10.9965	-4.56447	1.2e-05	0.000275204	Down
N4BP2	-0.953987	7.58959	-4.56403	1.21e-05	0.000275419	Down
BCL2L2-PABPN1	-0.228294	10.5276	-4.56341	1.21e-05	0.000275837	Down
OXCT1	-0.429253	9.34816	-4.56272	1.21e-05	0.000276346	Down
GPAM	-0.401488	8.06475	-4.5624	1.21e-05	0.000276358	Down
ZBED1	0.3473	9.68072	4.56222	1.21e-05	0.000276358	Up
RXRA	0.522857	10.7726	4.56192	1.22e-05	0.000276419	Up
NHS	-0.693092	7.67469	-4.56128	1.22e-05	0.00027686	Down
MON2	-0.40839	9.6431	-4.56046	1.22e-05	0.000277508	Down
ADAR	0.314244	13.1241	4.55992	1.23e-05	0.000277756	Up
EOGT	-0.682463	7.24378	-4.55975	1.23e-05	0.000277756	Down
KIF21A	-0.788153	7.954	-4.55937	1.23e-05	0.00027792	Down
FMO5	0.651478	6.74781	4.55774	1.24e-05	0.000279488	Up
BORA	-0.344158	8.27969	-4.55737	1.24e-05	0.000279626	Down
LYSMD3	-0.638885	9.62349	-4.55702	1.24e-05	0.000279757	Down
ATP11A-AS1	0.652343	4.68125	4.55622	1.24e-05	0.000280193	Up
GBAP1	0.473015	9.63219	4.55615	1.25e-05	0.000280193	Up
RAB29	-0.288031	11.8114	-4.553	1.26e-05	0.000283518	Down
BEX4	-0.357421	9.13632	-4.55115	1.27e-05	0.00028514	Down
NFYA	-0.455205	8.88702	-4.5509	1.27e-05	0.00028514	Down
TAB2	-0.382472	11.0077	-4.55046	1.27e-05	0.00028514	Down
ABCD2	-1.12229	6.1174	-4.55024	1.28e-05	0.00028514	Down
SUPV3L1	-0.307092	8.62863	-4.55019	1.28e-05	0.00028514	Down
AP5S1	0.270937	9.1006	4.55015	1.28e-05	0.00028514	Up
ARFIP1	-0.391671	8.88631	-4.54487	1.3e-05	0.0002905	Down
TASP1	-0.3733	8.41021	-4.54484	1.3e-05	0.0002905	Down
TKT	0.33165	13.8736	4.54484	1.3e-05	0.0002905	Up
ITPRIP	0.383011	11.5384	4.54407	1.31e-05	0.000291122	Up
NAE1	-0.533347	10.1156	-4.54339	1.31e-05	0.000291647	Down
TPRG1L	0.248031	12.0809	4.54211	1.32e-05	0.000292719	Up
SNHG18	0.869753	5.70449	4.54201	1.32e-05	0.000292719	Up
ZDHHC20	-0.551919	11.052	-4.54101	1.32e-05	0.000293343	Down
BMP4	0.335053	3.6761	4.54059	1.33e-05	0.000293343	Up
AS3MT	-0.424369	6.9964	-4.54054	1.33e-05	0.000293343	Down
MAFG	0.350572	9.73973	4.54053	1.33e-05	0.000293343	Up
PLXDC2	0.403311	8.19883	4.53956	1.33e-05	0.000294207	Up
UFM1	-0.495495	9.80691	-4.53655	1.35e-05	0.000297535	Down
ZC3H3	0.430044	8.62956	4.53586	1.35e-05	0.000298083	Up
ANXA2P2	0.229576	12.5977	4.53485	1.36e-05	0.00029887	Up
DIMT1	-0.400178	10.8923	-4.53473	1.36e-05	0.00029887	Down
IFITM1	0.336775	14.548	4.53182	1.37e-05	0.000302126	Up
KRT7	0.439699	8.47723	4.53123	1.38e-05	0.000302557	Up
PLGLB1	-0.432096	9.03997	-4.5279	1.4e-05	0.000306365	Down
DCUN1D4	-0.481046	8.23638	-4.52734	1.4e-05	0.000306764	Down
PPM1B	-0.546844	11.6681	-4.52671	1.4e-05	0.000307256	Down
WDR7	-0.278396	9.48795	-4.52609	1.41e-05	0.000307739	Down
CD226	-0.583754	8.08739	-4.52479	1.41e-05	0.000309068	Down
RNPEPL1	0.33888	10.5057	4.52431	1.42e-05	0.000309373	Up
AASDHPPT	-0.606455	10.8351	-4.52391	1.42e-05	0.000309576	Down
ESCO1	-0.41282	10.3273	-4.52195	1.43e-05	0.000311745	Down
MGAT1	0.263447	11.1525	4.52079	1.44e-05	0.000312909	Up
BRI3BP	-0.332423	10.3855	-4.51973	1.44e-05	0.000313763	Down
TGM2	0.549764	9.3782	4.51943	1.44e-05	0.000313763	Up
RNF167	0.492906	9.63694	4.5192	1.45e-05	0.000313763	Up
LOC100507217	-0.453092	12.2644	-4.51917	1.45e-05	0.000313763	Down
AVPR1B	0.640955	6.31917	4.5167	1.46e-05	0.000316622	Up
TALDO1	0.319435	15.0604	4.51633	1.46e-05	0.000316789	Up
AC006129.2	-1.02326	7.17316	-4.51471	1.47e-05	0.000318268	Down
TRMT11	-0.703332	8.03944	-4.51471	1.47e-05	0.000318268	Down
RAB5A	-0.475876	9.73176	-4.5144	1.47e-05	0.000318361	Down
SUCLG2	-0.369958	10.1035	-4.51344	1.48e-05	0.000319002	Down
CDC42EP3	0.348332	12.1194	4.51344	1.48e-05	0.000319002	Up
TMF1	-0.503793	9.03727	-4.51185	1.49e-05	0.000320761	Down
DSTN	-0.319467	11.3481	-4.51056	1.5e-05	0.000322128	Down
SCOC	-0.84574	7.50519	-4.50992	1.5e-05	0.000322662	Down
SLK	-0.214117	10.72	-4.50772	1.51e-05	0.000325234	Down
POC5	-0.288235	8.81931	-4.50327	1.54e-05	0.000330809	Down
NUP85	-0.227891	9.88422	-4.50268	1.55e-05	0.000331296	Down
C8orf88	0.62876	7.75001	4.50193	1.55e-05	0.000331977	Up
IBTK	-0.555579	9.28189	-4.50167	1.55e-05	0.000332016	Down
OLFML2B	0.434619	6.81952	4.50076	1.56e-05	0.000332793	Up
FAM91A1	-0.386494	11.1591	-4.50059	1.56e-05	0.000332793	Down
LOC101929841	-0.224248	9.65495	-4.50025	1.56e-05	0.000332793	Down
KIAA1468	-0.390583	9.48275	-4.50017	1.56e-05	0.000332793	Down
PPAPDC2	-0.332345	9.28381	-4.49892	1.57e-05	0.000334158	Down
CAPN1	0.440488	8.63283	4.49777	1.58e-05	0.000335395	Up
AIMP1	-0.604988	8.73994	-4.49348	1.6e-05	0.000340931	Down
MOCS2	-0.543761	7.85231	-4.49035	1.62e-05	0.000344588	Down
MGEA5	-0.35985	10.6848	-4.48999	1.63e-05	0.000344588	Down
HAAO	0.497988	7.75281	4.48993	1.63e-05	0.000344588	Up
CLDND1	-0.352303	10.7218	-4.48991	1.63e-05	0.000344588	Down
CDK11A	-0.276617	9.27122	-4.48947	1.63e-05	0.000344879	Down
SMPDL3B	0.5031	8.34611	4.48647	1.65e-05	0.000348752	Up
RP11-554D14.1	0.783333	6.19201	4.48452	1.66e-05	0.000351169	Up
C9orf16	0.438377	11.2535	4.48307	1.67e-05	0.000352611	Up
TNFSF14	0.418436	10.0226	4.48304	1.67e-05	0.000352611	Up
RP11-65L19.4	0.509023	8.60557	4.47991	1.69e-05	0.000356755	Up
RNF170	0.435416	7.90505	4.47897	1.7e-05	0.000357771	Up
HIST1H4H	0.637789	8.07115	4.47831	1.71e-05	0.000358395	Up
ITGAV	-0.771777	8.79733	-4.47771	1.71e-05	0.000358931	Down
RP3-412A9.16	0.429618	7.96963	4.47681	1.72e-05	0.000359898	Up
SIGLEC5	0.488009	10.9231	4.47596	1.72e-05	0.000360643	Up
ANKRD44	-0.531444	12.2059	-4.47584	1.72e-05	0.000360643	Down
MT1G	0.429939	10.547	4.47544	1.73e-05	0.000360717	Up
CASD1	-0.673672	8.71873	-4.47526	1.73e-05	0.000360717	Down
HAUS3	-0.528057	8.68832	-4.47511	1.73e-05	0.000360717	Down
KCNMB1	0.447032	6.97387	4.47486	1.73e-05	0.000360751	Up
RBBP4	-0.346962	11.3346	-4.47263	1.74e-05	0.000363658	Down
LOC100287525	0.564834	6.91997	4.47147	1.75e-05	0.000365032	Up
PPIP5K2	-0.606591	9.99654	-4.471	1.76e-05	0.000365388	Down
TMEM234	0.306978	9.11095	4.46993	1.76e-05	0.00036663	Up
SH2D1B	-0.656171	8.40647	-4.46901	1.77e-05	0.000367651	Down
GAS6	0.371742	9.13678	4.46758	1.78e-05	0.000369381	Up
UBL3	-0.746571	9.42506	-4.46739	1.78e-05	0.000369381	Down
H3F3A	0.292883	16.3426	4.46679	1.79e-05	0.000369931	Up
AC008746.12	-0.732511	6.89804	-4.4664	1.79e-05	0.000370167	Down
NPY2R	0.536162	7.18556	4.46535	1.8e-05	0.000371405	Up
HIST2H2BE	0.555345	10.9066	4.46387	1.81e-05	0.000373015	Up
NRD1	0.272732	12.2259	4.46382	1.81e-05	0.000373015	Up
PPP1R18	0.374548	13.5135	4.46138	1.83e-05	0.000376341	Up
PTCD3	-0.306442	10.0629	-4.46019	1.83e-05	0.000377793	Down
C3orf58	-0.390376	10.4269	-4.45957	1.84e-05	0.000378397	Down
SACS	-0.738627	8.34442	-4.45878	1.84e-05	0.000379261	Down
PKD2	-0.426008	8.45567	-4.45822	1.85e-05	0.000379764	Down
R3HDM4	0.575687	14.4157	4.4579	1.85e-05	0.000379912	Up
CD69	-0.878403	8.82722	-4.45455	1.88e-05	0.000384701	Down
UCK1	0.249375	10.3289	4.4542	1.88e-05	0.000384897	Up
RNF6	-0.523751	10.9481	-4.45386	1.88e-05	0.000384956	Down
BTBD1	-0.409544	10.6854	-4.45372	1.88e-05	0.000384956	Down
PPP1R35	-0.225002	10.6594	-4.45321	1.89e-05	0.000385393	Down
RBM7	-0.446375	10.7688	-4.45261	1.89e-05	0.000385975	Down
RP5-930J4.4	-0.38774	9.7004	-4.45159	1.9e-05	0.000387206	Down
MCOLN1	0.545663	10.8307	4.44934	1.92e-05	0.000389886	Up
MYL9	1.34866	7.86333	4.44928	1.92e-05	0.000389886	Up
MSH6	-0.288031	9.94524	-4.4492	1.92e-05	0.000389886	Down
CNOT7	-0.382847	8.54076	-4.44842	1.92e-05	0.000390525	Down
LOC100506548	-0.329132	8.86653	-4.44835	1.92e-05	0.000390525	Down
MKNK2	0.351084	13.4559	4.44791	1.93e-05	0.000390859	Up
SENP1	-0.578375	7.46502	-4.44744	1.93e-05	0.000391251	Down
OSGEPL1	-0.609178	8.34867	-4.44664	1.94e-05	0.000392125	Down
ZNF124	-0.421677	8.69652	-4.44644	1.94e-05	0.000392125	Down
BTBD7	0.304193	9.99739	4.44602	1.94e-05	0.000392435	Up
ENGASE	-0.400638	9.37272	-4.44541	1.95e-05	0.000392809	Down
SIRPB2	0.533397	9.51619	4.44534	1.95e-05	0.000392809	Up
FAM63A	0.411139	11.3277	4.44473	1.95e-05	0.000393428	Up
KBTBD2	-0.382659	10.6659	-4.44412	1.96e-05	0.000394042	Down
PNRC2	-0.472062	12.4097	-4.44301	1.96e-05	0.000395368	Down
GP1BB	0.640414	10.4706	4.44284	1.97e-05	0.000395368	Up
DHRS7B	0.288887	9.43111	4.44192	1.97e-05	0.000396381	Up
C8orf59	-0.814217	7.78367	-4.44176	1.97e-05	0.000396381	Down
ASPHD1	0.439292	9.46337	4.4402	1.99e-05	0.000398503	Up
FASTKD2	-0.567342	7.63807	-4.43881	2e-05	0.000400376	Down
NXPE3	-0.450487	8.27055	-4.43845	2e-05	0.000400612	Down
USP37	-0.493161	7.7736	-4.43731	2.01e-05	0.000402081	Down
ST3GAL1	0.312737	10.3187	4.43449	2.03e-05	0.000406088	Up
B4GALT4	-0.380015	8.36358	-4.43439	2.03e-05	0.000406088	Down
GNG5	0.322242	13.2213	4.43387	2.04e-05	0.00040658	Up
TNFAIP8	-0.489255	11.8356	-4.43345	2.04e-05	0.000406905	Down
METTL4	-0.329375	9.20174	-4.43269	2.05e-05	0.000407791	Down
ATP1B2	0.665065	7.92418	4.43177	2.06e-05	0.000408664	Up
CAAP1	-0.506183	9.38406	-4.43172	2.06e-05	0.000408664	Down
CNOT11	-0.24298	11.1094	-4.4311	2.06e-05	0.000409308	Down
PDE3B	-0.305285	9.21017	-4.43045	2.07e-05	0.000410019	Down
IQCB1	-0.403628	9.69691	-4.43002	2.07e-05	0.000410275	Down
HACE1	-0.731617	7.92096	-4.42986	2.07e-05	0.000410275	Down
LOC102606465	-0.384161	8.99149	-4.4275	2.09e-05	0.0004138	Down
TARBP1	-0.467151	9.03551	-4.42701	2.09e-05	0.000414262	Down
LTN1	-0.527753	10.3488	-4.42397	2.12e-05	0.00041895	Down
NUP214	0.349056	11.8915	4.42319	2.13e-05	0.000419884	Up
MYEF2	0.871315	5.32723	4.4227	2.13e-05	0.000420349	Up
C4orf48	0.543343	11.4259	4.42227	2.13e-05	0.000420698	Up
JAK2	0.578789	8.3906	4.42202	2.14e-05	0.000420766	Up
RAPGEF6	-0.299037	10.8455	-4.42167	2.14e-05	0.000420983	Down
FAM160B1	0.793819	6.08603	4.42123	2.14e-05	0.000421356	Up
RP11-846E15.2	-0.493181	9.7476	-4.4196	2.16e-05	0.00042374	Down
RPL5	-0.423702	13.6552	-4.41771	2.17e-05	0.000426591	Down
CTNNB1	-0.467803	8.73811	-4.41735	2.18e-05	0.00042667	Down
UBP1	-0.314369	10.5699	-4.41723	2.18e-05	0.00042667	Down
PGAM1	0.208999	13.9625	4.41514	2.2e-05	0.00042987	Up
LCK	-0.420034	12.1398	-4.41325	2.21e-05	0.000432744	Down
ZNF621	-0.445034	8.31763	-4.41098	2.23e-05	0.000436294	Down
SMC4	-0.688748	8.67485	-4.40851	2.25e-05	0.000440189	Down
WDR11	-0.345043	10.2953	-4.40832	2.26e-05	0.000440189	Down
FLOT2	0.52467	12.7038	4.40651	2.27e-05	0.000442646	Up
RBM39	-0.439456	12.6499	-4.40649	2.27e-05	0.000442646	Down
ADAM10	-0.463869	12.6786	-4.40618	2.28e-05	0.000442828	Down
LAMTOR3	-0.488649	10.6925	-4.40448	2.29e-05	0.000444829	Down
PYROXD1	-0.444634	10.2816	-4.40446	2.29e-05	0.000444829	Down
TSPYL4	-0.269619	10.2929	-4.4044	2.29e-05	0.000444829	Down
PRKCI	-0.792855	6.33129	-4.40368	2.3e-05	0.000445724	Down
SERPINA5	0.520309	4.40325	4.40322	2.3e-05	0.000446171	Up
BOD1L1	-0.304968	11.8363	-4.40212	2.31e-05	0.0004477	Down
ITPKC	0.405379	8.47537	4.40149	2.32e-05	0.0004477	Up
ZNHIT6	-0.384741	9.42908	-4.4014	2.32e-05	0.0004477	Down
LOC101928205	0.449577	6.93903	4.4012	2.32e-05	0.0004477	Up
TNFAIP2	0.947682	7.48338	4.40106	2.32e-05	0.0004477	Up
KCMF1	0.191168	12.654	4.40091	2.32e-05	0.0004477	Up
SAE1	-0.307328	10.3182	-4.40087	2.32e-05	0.0004477	Down
NUP107	-0.354051	10.0716	-4.39944	2.34e-05	0.000449879	Down
NRIP3	0.465456	7.16249	4.39618	2.37e-05	0.000454866	Up
ZCCHC14	-0.416109	8.5602	-4.39616	2.37e-05	0.000454866	Down
TMEM243	-0.457831	10.7399	-4.39597	2.37e-05	0.000454866	Down
LOC100996412	0.399907	11.7123	4.39582	2.37e-05	0.000454866	Up
SLAIN1	-0.47655	8.3346	-4.39481	2.38e-05	0.000456203	Down
SKP2	-0.319151	9.27948	-4.39466	2.38e-05	0.000456203	Down
LOC284513	-0.399725	7.7654	-4.3943	2.39e-05	0.00045646	Down
MAP3K12	-0.777527	6.28335	-4.39333	2.39e-05	0.00045785	Down
TPM2	-0.877708	6.9321	-4.39292	2.4e-05	0.000458216	Down
RP11-258C19.7	-0.61395	7.49328	-4.39225	2.41e-05	0.000459044	Down
AMIGO2	-0.738046	9.70861	-4.39197	2.41e-05	0.000459094	Down
RP1-187B23.1	0.710743	6.3347	4.3918	2.41e-05	0.000459094	Up
SPDL1	-0.606652	7.46294	-4.39071	2.42e-05	0.000460699	Down
FAM13B	-0.298216	10.2984	-4.38821	2.44e-05	0.000464905	Down
LOC728392	-0.369761	11.1777	-4.38771	2.45e-05	0.000465447	Down
DHFRL1	-0.798707	6.80081	-4.38696	2.46e-05	0.000466444	Down
ETS1	-0.566237	9.58321	-4.38634	2.46e-05	0.000467206	Down
GSTZ1	0.70532	5.37424	4.38534	2.47e-05	0.000468669	Up
PAQR8	-0.372323	10.1017	-4.38463	2.48e-05	0.000469605	Down
PPP3CC	-0.448513	9.5695	-4.38431	2.48e-05	0.000469823	Down
LIX1L	-0.269457	11.5915	-4.38301	2.5e-05	0.000471465	Down
LOC642236	-0.988278	7.08017	-4.38301	2.5e-05	0.000471465	Down
LNX1	-0.666816	7.48098	-4.38088	2.52e-05	0.000474715	Down
HIST1H2BC	0.413667	9.222	4.38086	2.52e-05	0.000474715	Up
METTL9	0.472601	12.487	4.38046	2.52e-05	0.000475074	Up
RSBN1	-0.380926	10.3378	-4.3794	2.53e-05	0.000476486	Down
SLC33A1	-0.335253	8.83624	-4.3793	2.53e-05	0.000476486	Down
RPL11	-0.451705	14.3614	-4.37742	2.55e-05	0.000479321	Down
UPP1	0.461991	11.0922	4.37729	2.55e-05	0.000479321	Up
ITSN2	-0.580191	11.8987	-4.37718	2.55e-05	0.000479321	Down
SIK2	0.355897	7.84317	4.37676	2.56e-05	0.000479723	Up
PPT1	0.282252	13.844	4.37649	2.56e-05	0.000479838	Up
SRSF8	-0.401855	10.8396	-4.37511	2.57e-05	0.00048208	Down
DAPL1	0.544126	3.9445	4.37407	2.58e-05	0.000483658	Up
FKTN	-0.349155	8.57949	-4.37381	2.59e-05	0.000483774	Down
ELF2	-0.386198	10.8985	-4.37354	2.59e-05	0.000483891	Down
TBRG1	-0.386398	8.74712	-4.37209	2.61e-05	0.000486278	Down
DGUOK	-0.336527	9.01047	-4.37168	2.61e-05	0.000486663	Down
SHQ1	-0.436558	9.68405	-4.3714	2.61e-05	0.000486663	Down
RRM2B	-0.456126	10.048	-4.37122	2.61e-05	0.000486663	Down
LYRM5	-0.397776	9.69567	-4.37102	2.62e-05	0.000486663	Down
CCT2	-0.635974	10.1036	-4.37086	2.62e-05	0.000486663	Down
CYB5B	-0.339832	9.4959	-4.3705	2.62e-05	0.000486959	Down
MSRB1	0.428223	13.9007	4.36873	2.64e-05	0.000489989	Up
RPH3A	0.588741	8.59922	4.36643	2.66e-05	0.000494061	Up
EFHC1	-0.772203	7.51734	-4.3662	2.67e-05	0.000494113	Down
ADPGK	-0.233497	12.1659	-4.36595	2.67e-05	0.00049421	Down
ARHGEF9	-0.570822	7.60741	-4.36568	2.67e-05	0.000494238	Down
TVP23B	-0.638291	8.96196	-4.36552	2.67e-05	0.000494238	Down
RNF138	-0.580365	11.1634	-4.36494	2.68e-05	0.000494972	Down
KIAA1551	-0.472574	12.8027	-4.36349	2.7e-05	0.000497209	Down
PHC1	-0.404158	9.35769	-4.36339	2.7e-05	0.000497209	Down
FGFR4	0.440546	3.31638	4.36171	2.71e-05	0.000500117	Up
AK023627	-0.503592	7.17874	-4.3602	2.73e-05	0.000502527	Down
POT1	-0.434032	8.69259	-4.36009	2.73e-05	0.000502527	Down
STARD4	-0.576691	8.48735	-4.35952	2.74e-05	0.000503255	Down
ATOX1	0.240766	10.4855	4.35869	2.75e-05	0.000504498	Up
JMJD1C	-0.642244	11.0792	-4.35705	2.76e-05	0.000507372	Down
PIGW	-0.484359	7.39133	-4.35596	2.78e-05	0.00050915	Down
PLBD1	0.402935	13.6309	4.35559	2.78e-05	0.000509498	Up
DUSP12	-0.255594	9.42769	-4.35495	2.79e-05	0.000510381	Down
ALKBH2	-0.724144	7.14133	-4.35473	2.79e-05	0.000510398	Down
MAP4K3	-0.718905	7.40217	-4.35406	2.8e-05	0.000511345	Down
ATR	-0.612903	8.58625	-4.35346	2.8e-05	0.000512162	Down
BUD13	-0.232987	9.01472	-4.35323	2.81e-05	0.000512206	Down
ZNF567	-0.732332	8.08006	-4.35129	2.83e-05	0.00051573	Down
PRMT6	-0.470433	8.3329	-4.35051	2.84e-05	0.000516913	Down
HSP90AB1	-0.473162	12.1372	-4.35	2.84e-05	0.000517546	Down
BROX	-0.446233	11.2914	-4.3448	2.9e-05	0.000527839	Down
TRAT1	-0.739457	9.60294	-4.3434	2.92e-05	0.000529978	Down
PDIK1L	-0.536209	8.17917	-4.34337	2.92e-05	0.000529978	Down
EIF6	0.201033	10.8405	4.34218	2.93e-05	0.000531649	Up
SLC39A6	-0.619617	7.80612	-4.34217	2.93e-05	0.000531649	Down
RBP7	0.385983	9.40187	4.34082	2.95e-05	0.000534035	Up
TMEM63B	0.615372	9.88446	4.34063	2.95e-05	0.000534035	Up
L3HYPDH	-0.425227	7.61445	-4.34027	2.95e-05	0.000534368	Down
OTUD3	-0.381541	8.55505	-4.34003	2.96e-05	0.000534464	Down
TMEM8A	0.375451	11.1714	4.33829	2.98e-05	0.000537169	Up
LEAP2	-0.276608	8.34134	-4.33806	2.98e-05	0.000537169	Down
CREB3	0.271666	9.34554	4.33805	2.98e-05	0.000537169	Up
SF3A2	0.716324	9.00689	4.33795	2.98e-05	0.000537169	Up
ADRBK2	0.265375	9.20009	4.33746	2.99e-05	0.000537212	Up
ADSS	-0.330837	10.6061	-4.33736	2.99e-05	0.000537212	Down
CAMK2D	-0.447375	8.93925	-4.3373	2.99e-05	0.000537212	Down
PTP4A2	-0.28885	11.7701	-4.33713	2.99e-05	0.000537212	Down
FRA10AC1	-0.450444	8.49122	-4.33671	3e-05	0.000537578	Down
STAT4	-0.379954	11.527	-4.33655	3e-05	0.000537578	Down
RYBP	0.390604	12.0429	4.33625	3e-05	0.000537792	Up
DCK	-0.589838	10.7393	-4.33556	3.01e-05	0.000538838	Down
ZDHHC3	0.308246	9.96803	4.33365	3.03e-05	0.000542472	Up
RP11-121C2.2	-0.738305	7.21866	-4.33346	3.03e-05	0.000542472	Down
LOC100506299	0.348148	7.68555	4.33266	3.04e-05	0.000543748	Up
LINC00636	0.67366	6.18621	4.33112	3.06e-05	0.000546631	Up
SIAH1	-0.446296	7.6892	-4.33023	3.07e-05	0.000548113	Down
SUCNR1	0.662475	7.15577	4.32957	3.08e-05	0.000549111	Up
NBPF10	-0.16739	14.0239	-4.32901	3.09e-05	0.000549902	Down
EP400	-0.371338	9.58742	-4.32862	3.09e-05	0.000550307	Down
PNISR	-0.431867	11.6082	-4.3276	3.11e-05	0.000552083	Down
SLC30A7	-0.241772	11.1577	-4.32683	3.11e-05	0.00055334	Down
MORC2	-0.346598	10.9814	-4.32564	3.13e-05	0.000555496	Down
BBS10	-0.520854	8.05412	-4.32466	3.14e-05	0.00055705	Down
B4GALT5	0.442493	11.8866	4.32433	3.15e-05	0.00055705	Up
LOC100996792	0.620225	12.9985	4.32418	3.15e-05	0.00055705	Up
WDR37	0.300835	8.19622	4.32414	3.15e-05	0.00055705	Up
ARL6IP6	-0.504769	10.8617	-4.32383	3.15e-05	0.000557313	Down
ZNF439	-0.861213	7.01402	-4.32316	3.16e-05	0.000558342	Down
ST3GAL4	0.940299	6.1202	4.32249	3.17e-05	0.000559383	Up
SOCS5	-0.436646	8.34033	-4.32062	3.19e-05	0.000563075	Down
ITGA2B	0.69102	9.4413	4.31936	3.21e-05	0.000565424	Up
NUPL2	-0.299451	9.26508	-4.31832	3.22e-05	0.0005673	Down
LOC202025	-0.428008	9.95364	-4.31724	3.23e-05	0.00056928	Down
FAM174A	-0.473155	10.1752	-4.31628	3.25e-05	0.000570199	Down
BCL11B	-0.435487	11.0413	-4.31628	3.25e-05	0.000570199	Down
ANKRD34A	0.731658	5.75822	4.31624	3.25e-05	0.000570199	Up
ZNF529	-0.640691	7.8986	-4.31554	3.26e-05	0.000571107	Down
BTK	0.281098	10.4934	4.31544	3.26e-05	0.000571107	Up
MFSD12	-0.479613	8.68685	-4.31408	3.27e-05	0.000573724	Down
CD46	-0.585745	10.795	-4.31332	3.28e-05	0.000574575	Down
HSP90B1	-0.424707	11.2831	-4.31332	3.28e-05	0.000574575	Down
MIR3682	-0.388524	7.63263	-4.31309	3.29e-05	0.000574655	Down
ACADM	-0.590521	10.0786	-4.31253	3.29e-05	0.000575349	Down
SETX	-0.235739	11.475	-4.31239	3.3e-05	0.000575349	Down
RFX7	-0.579735	7.62197	-4.31106	3.31e-05	0.000577787	Down
TNFRSF1B	0.357264	12.7701	4.31083	3.32e-05	0.000577787	Up
ATL2	-0.485418	6.96916	-4.31073	3.32e-05	0.000577787	Down
SASH1	0.691407	7.71655	4.31007	3.33e-05	0.000578834	Up
ABCA5	-0.501192	8.27902	-4.30951	3.33e-05	0.000579658	Down
FOXO3	0.491392	12.5171	4.30831	3.35e-05	0.000581951	Up
KLHL42	-0.394908	8.88976	-4.30716	3.36e-05	0.00058414	Down
RNF122	0.361678	8.97513	4.30667	3.37e-05	0.00058483	Up
ISOC2	0.601978	7.99795	4.30572	3.38e-05	0.000586562	Up
THAP8	0.310004	8.45945	4.30537	3.39e-05	0.000586921	Up
HSPA13	-0.713307	8.95798	-4.30291	3.42e-05	0.000592153	Down
SLC2A11	0.322668	8.30936	4.30241	3.43e-05	0.000592656	Up
WDR13	0.331433	10.0595	4.30223	3.43e-05	0.000592656	Up
MICU2	-0.47267	11.0994	-4.30212	3.43e-05	0.000592656	Down
ZNF320	-0.495199	7.70189	-4.30165	3.44e-05	0.000593288	Down
GYG1	0.524343	11.4739	4.30078	3.45e-05	0.000594871	Up
LEO1	-0.341755	8.21746	-4.29963	3.47e-05	0.000597109	Down
SAPCD1-AS1	0.552746	6.6512	4.29938	3.47e-05	0.00059724	Up
NFATC2IP	-0.361086	9.92861	-4.29661	3.51e-05	0.000603034	Down
MARCKS	0.534655	9.3839	4.29638	3.51e-05	0.000603034	Up
SLC22A4	0.520869	11.2267	4.29634	3.51e-05	0.000603034	Up
GUCA2A	0.506456	4.44194	4.29608	3.51e-05	0.000603176	Up
LILRA2	0.417967	12.1923	4.29562	3.52e-05	0.000603826	Up
TARP	-0.552403	12.4881	-4.29468	3.53e-05	0.00060456	Down
FYTTD1	-0.38411	11.525	-4.29462	3.53e-05	0.00060456	Down
ZBED5	-0.446765	11.0977	-4.29462	3.53e-05	0.00060456	Down
LRIG2	-0.224116	8.49293	-4.29445	3.54e-05	0.00060456	Down
T-18	1.02323	4.27114	4.29416	3.54e-05	0.00060456	Up
C14orf142	-0.453545	8.57866	-4.29416	3.54e-05	0.00060456	Down
TRDV3	-0.605576	11.7445	-4.29373	3.55e-05	0.000605126	Down
HDAC2	-0.410189	10.5667	-4.29343	3.55e-05	0.00060539	Down
GGTLC1	0.398568	7.98883	4.2919	3.57e-05	0.000608552	Up
DNAJC21	-0.577486	6.94855	-4.29132	3.58e-05	0.000609502	Down
TMEM106A	0.48317	7.49598	4.291	3.58e-05	0.000609809	Up
DNAJC5	0.327288	10.6067	4.29007	3.6e-05	0.000611571	Up
BCOR	-0.37306	7.99936	-4.28888	3.61e-05	0.000613969	Down
PRKACA	0.465442	10.1263	4.28828	3.62e-05	0.000614692	Up
SPRTN	-0.494901	7.35371	-4.28814	3.62e-05	0.000614692	Down
ZNF704	1.01867	4.31595	4.28801	3.63e-05	0.000614692	Up
TOM1	0.388465	9.07275	4.28772	3.63e-05	0.000614937	Up
NOL11	-0.299406	10.1316	-4.28721	3.64e-05	0.000615524	Down
PACSIN3	0.808385	3.90963	4.28709	3.64e-05	0.000615524	Up
S1PR5	-1.14856	7.07308	-4.28571	3.66e-05	0.000618411	Down
FAIM	-0.439628	7.09504	-4.285	3.67e-05	0.000619661	Down
RRP15	-0.638896	7.13922	-4.28221	3.71e-05	0.000625847	Down
KLHDC1	-0.677025	7.75202	-4.28208	3.71e-05	0.000625847	Down
HDAC10	0.318582	8.68608	4.28188	3.71e-05	0.000625874	Up
FAM76B	-0.967208	8.64454	-4.2803	3.74e-05	0.000629277	Down
TMEM251	-0.275279	9.75062	-4.27861	3.76e-05	0.000632981	Down
HIST1H1C	0.522105	10.5609	4.27711	3.78e-05	0.000636238	Up
CYB5R3	0.533568	10.0301	4.2763	3.8e-05	0.000637775	Up
DICER1	0.465679	11.0435	4.2752	3.81e-05	0.000640048	Up
RP1-151F17.2	-0.37149	7.98216	-4.27365	3.84e-05	0.000643225	Down
DENR	-0.361746	10.72	-4.27355	3.84e-05	0.000643225	Down
RHOQ	0.393156	9.5548	4.27281	3.85e-05	0.000644288	Up
FAM129B	0.701129	7.02123	4.27262	3.85e-05	0.000644288	Up
LOC102724356	-0.419049	10.8045	-4.27243	3.85e-05	0.000644288	Down
LOC101927365	-0.298565	8.6962	-4.27233	3.86e-05	0.000644288	Down
STK4	-0.291518	8.72388	-4.27219	3.86e-05	0.000644288	Down
LINC00408	0.659294	4.29514	4.27143	3.87e-05	0.000645567	Up
LEF1-AS1	-0.639837	6.67274	-4.27131	3.87e-05	0.000645567	Down
PATL2	-0.473661	10.1813	-4.27099	3.88e-05	0.000645909	Down
SMARCA5	-0.455308	9.58091	-4.26964	3.9e-05	0.000648839	Down
ACTR6	-0.773486	8.58906	-4.26794	3.92e-05	0.000652382	Down
USP16	-0.498589	10.2166	-4.26787	3.92e-05	0.000652382	Down
ZNF160	-0.540246	7.41123	-4.2674	3.93e-05	0.000652906	Down
MAP1S	0.416611	8.23407	4.26729	3.93e-05	0.000652906	Up
LILRA5	0.568672	7.53364	4.26558	3.96e-05	0.000656789	Up
ZNF75D	-0.541869	7.62443	-4.26508	3.97e-05	0.000657213	Down
FRAS1	0.865295	6.06061	4.26497	3.97e-05	0.000657213	Up
MOAP1	-0.317878	10.3611	-4.26486	3.97e-05	0.000657213	Down
FEZ2	0.283607	10.5996	4.26453	3.97e-05	0.000657583	Up
MTERF3	-0.481941	9.12934	-4.26384	3.99e-05	0.00065886	Down
TAPBPL	0.271604	9.988	4.26362	3.99e-05	0.000658948	Up
ZNF43	-0.513611	7.72406	-4.26238	4.01e-05	0.000661657	Down
FCRL3	-0.630362	7.92852	-4.26187	4.02e-05	0.000662172	Down
TSNAX	-0.578394	10.4764	-4.26181	4.02e-05	0.000662172	Down
LOC101928927	-0.446039	9.16498	-4.26073	4.03e-05	0.000664494	Down
DPP4	-0.896875	7.59177	-4.26043	4.04e-05	0.000664803	Down
FCRL2	-0.595398	9.05674	-4.25928	4.06e-05	0.000667285	Down
EIF3J-AS1	-0.446359	8.35047	-4.25846	4.07e-05	0.000668945	Down
RABGGTB	-0.539404	8.11481	-4.25822	4.07e-05	0.000669085	Down
IP6K1	0.365082	9.78112	4.25761	4.08e-05	0.000670141	Up
NUDT19	-0.325863	10.3394	-4.25745	4.09e-05	0.000670141	Down
LOC285423	0.834322	5.65082	4.25632	4.1e-05	0.000672213	Up
EGFL8	-0.737912	6.44901	-4.25625	4.1e-05	0.000672213	Down
CBFB	-0.33712	11.7804	-4.25607	4.11e-05	0.000672213	Down
SCGB2A2	1.00272	4.93824	4.25592	4.11e-05	0.000672213	Up
RPAP3	-0.561384	7.76157	-4.25535	4.12e-05	0.000672758	Down
SUPT16H	-0.21263	11.2956	-4.25534	4.12e-05	0.000672758	Down
SMIM15	-0.580922	10.1623	-4.25457	4.13e-05	0.000673651	Down
NPM1	-0.424476	12.8416	-4.25456	4.13e-05	0.000673651	Down
ATF7IP2	-0.403188	8.96189	-4.25441	4.13e-05	0.000673651	Down
HEXIM1	-0.25046	10.5497	-4.25427	4.14e-05	0.000673651	Down
LZTFL1	-0.503294	8.30811	-4.2535	4.15e-05	0.000675181	Down
CMC1	-0.48872	9.32532	-4.25247	4.17e-05	0.00067714	Down
C5orf51	-0.168492	10.5476	-4.25239	4.17e-05	0.00067714	Down
NUP35	-0.492494	8.65895	-4.25151	4.18e-05	0.000678186	Down
PEX19	0.294126	9.40798	4.25146	4.18e-05	0.000678186	Up
RAB32	0.307472	11.5163	4.25144	4.18e-05	0.000678186	Up
SUCO	-0.538908	9.94021	-4.25027	4.2e-05	0.000680815	Down
SRXN1	0.494419	11.8699	4.24923	4.22e-05	0.000683087	Up
MSH2	-0.633534	8.21908	-4.24785	4.24e-05	0.000686259	Down
MLX	0.320209	9.57791	4.24724	4.25e-05	0.000687393	Up
EMP3	0.316268	13.0245	4.24644	4.26e-05	0.000688591	Up
POLR2J4	-0.319159	9.61853	-4.24631	4.27e-05	0.000688591	Down
ZCCHC8	-0.313938	10.7872	-4.24615	4.27e-05	0.000688591	Down
AURKAPS1	-0.361998	9.62442	-4.24607	4.27e-05	0.000688591	Down
PGBD1	-1.03478	4.76991	-4.24584	4.27e-05	0.000688729	Down
RNF24	0.459033	9.49741	4.24561	4.28e-05	0.000688843	Up
HDAC1	-0.255285	11.2385	-4.24519	4.29e-05	0.000689497	Down
APMAP	0.362762	13.0795	4.24499	4.29e-05	0.00068953	Up
FHL2	0.608005	8.49378	4.24474	4.29e-05	0.00068971	Up
KLK4	0.613593	8.19199	4.24442	4.3e-05	0.000690092	Up
ATP6V1D	0.339569	10.9508	4.2439	4.31e-05	0.000690587	Up
BAHD1	-0.422502	8.15189	-4.24373	4.31e-05	0.000690587	Down
TMEM192	-0.374818	9.59671	-4.24352	4.31e-05	0.000690587	Down
TXN2	0.267946	9.89135	4.24351	4.31e-05	0.000690587	Up
CEP135	-0.284204	9.02551	-4.24287	4.32e-05	0.000691722	Down
VPS28	0.26906	12.7072	4.24273	4.33e-05	0.000691722	Up
NFYB	-0.528953	8.85858	-4.24232	4.33e-05	0.00069208	Down
NDST1	0.316219	8.12615	4.24224	4.33e-05	0.00069208	Up
ELP2	-0.395664	8.92427	-4.24197	4.34e-05	0.000692305	Down
CDC42-IT1	0.413315	8.48581	4.24179	4.34e-05	0.000692305	Up
CNOT8	-0.30724	10.8889	-4.24129	4.35e-05	0.000693182	Down
ITGAM	0.414073	12.2667	4.24099	4.36e-05	0.000693501	Up
NUP50	-0.310144	11.8081	-4.24068	4.36e-05	0.000693852	Down
LOC101928476	0.450872	7.42177	4.23791	4.41e-05	0.000700852	Up
GGT1	0.354368	8.51723	4.23723	4.42e-05	0.000702213	Up
EIF1	0.337958	14.0082	4.23435	4.47e-05	0.000709606	Up
ZNF8	0.271251	8.78938	4.23408	4.47e-05	0.000709879	Up
AP2S1	0.365876	11.307	4.23271	4.5e-05	0.000711817	Up
SESTD1	0.304187	9.77377	4.23252	4.5e-05	0.000711817	Up
KLLN	0.852716	6.48187	4.23252	4.5e-05	0.000711817	Up
ARL13B	-0.622786	7.35603	-4.23249	4.5e-05	0.000711817	Down
ARGLU1	-0.524421	12.3256	-4.23248	4.5e-05	0.000711817	Down
ANKRD13B	0.643893	7.04597	4.23227	4.51e-05	0.000711892	Up
GABARAPL2	0.314746	13.6109	4.23195	4.51e-05	0.000712295	Up
MRPL28	0.299317	9.5381	4.2312	4.52e-05	0.000713858	Up
CIDEB	0.488063	10.2664	4.23022	4.54e-05	0.000716107	Up
TDG	-0.366969	9.91244	-4.22991	4.55e-05	0.000716452	Down
ZFP1	-0.556907	8.0918	-4.22934	4.56e-05	0.000717542	Down
EVL	-0.392751	12.1074	-4.22912	4.56e-05	0.000717669	Down
RPA3OS	-0.384272	9.02236	-4.22868	4.57e-05	0.00071841	Down
GNB2	0.374835	12.9551	4.22843	4.57e-05	0.000718603	Up
HDGF	0.567683	13.4291	4.22576	4.62e-05	0.000725579	Up
RFC4	-0.355939	8.80714	-4.22323	4.67e-05	0.00073222	Down
ENO2	-0.326046	8.84724	-4.22291	4.67e-05	0.000732612	Down
TMEM87A	-0.202299	11.0907	-4.22248	4.68e-05	0.000733338	Down
NUCB2	-0.528644	8.57153	-4.22187	4.69e-05	0.000734556	Down
STARD13	0.80066	6.03893	4.22113	4.7e-05	0.00073616	Up
RFC3	-0.481977	8.29086	-4.21992	4.73e-05	0.000738553	Down
FUT11	-0.325306	10.3211	-4.21981	4.73e-05	0.000738553	Down
RPP25L	0.192118	10.4318	4.21967	4.73e-05	0.000738553	Up
TCN2	0.443228	8.18401	4.21958	4.73e-05	0.000738553	Up
YTHDC2	-0.381288	9.14256	-4.21939	4.74e-05	0.000738601	Down
NOTCH3	0.743024	7.25388	4.21897	4.74e-05	0.000739312	Up
MTRR	-0.362349	8.35025	-4.21685	4.78e-05	0.000744868	Down
GTF2H1	-0.186886	10.7335	-4.21664	4.79e-05	0.000744964	Down
ZNF207	-0.346641	10.5542	-4.2163	4.79e-05	0.00074513	Down
TSEN15	-0.768952	9.70579	-4.21623	4.79e-05	0.00074513	Down
SPDYE1	-0.476726	8.09177	-4.21565	4.8e-05	0.000746319	Down
LPIN1	-0.645446	7.38247	-4.21522	4.81e-05	0.000746951	Down
FAM60A	-0.343706	10.6365	-4.21508	4.82e-05	0.000746951	Down
BC065766	-0.389887	7.61823	-4.21479	4.82e-05	0.000747282	Down
ARHGEF11	0.446566	9.24799	4.21333	4.85e-05	0.000750913	Up
PPP2R5B	0.6154	8.60722	4.21318	4.85e-05	0.000750913	Up
CRYZ	-0.541154	9.07471	-4.21255	4.86e-05	0.000752234	Down
RANBP6	-0.624826	9.01538	-4.21218	4.87e-05	0.0007528	Down
CD177	1.26663	8.64852	4.21166	4.88e-05	0.000753812	Up
RP11-799D4.4	-0.958894	5.52223	-4.21112	4.89e-05	0.000754878	Down
LOC113230	0.683179	6.9189	4.21064	4.9e-05	0.000755761	Up
EMILIN2	0.616093	7.0371	4.21025	4.91e-05	0.000756403	Up
GRB10	0.476317	8.39476	4.20837	4.94e-05	0.000760952	Up
NR3C2	-0.627089	8.06778	-4.20834	4.94e-05	0.000760952	Down
SUDS3	-0.241849	10.194	-4.20796	4.95e-05	0.000761564	Down
VPS13B	-1.04341	6.10233	-4.20761	4.96e-05	0.000762082	Down
SUPT7L	-0.256036	8.66141	-4.20712	4.97e-05	0.000763019	Down
ANKRD22	0.833575	8.55868	4.20529	5e-05	0.000767918	Up
AKT3	-0.298387	9.76103	-4.20408	5.02e-05	0.000770992	Down
ZNF665	-0.413469	9.12274	-4.2037	5.03e-05	0.000771608	Down
BET1	-0.423856	9.13038	-4.20312	5.04e-05	0.000772801	Down
MRFAP1L1	-0.476165	11.148	-4.20261	5.05e-05	0.000773634	Down
DYRK2	-0.448645	9.54278	-4.20233	5.06e-05	0.000773634	Down
ZNF609	-0.480587	7.96772	-4.20232	5.06e-05	0.000773634	Down
C2orf69	-0.335352	9.51449	-4.20012	5.1e-05	0.000779724	Down
TSPO	0.37769	13.3463	4.19963	5.11e-05	0.000780668	Up
KDM2B	-0.246736	10.3844	-4.1991	5.12e-05	0.00078173	Down
KLHL7	-0.519512	7.58169	-4.1984	5.14e-05	0.000783342	Down
BSG	0.695696	11.116	4.19781	5.15e-05	0.000784588	Up
RP11-95H11.1	0.51803	6.66923	4.19764	5.15e-05	0.000784588	Up
TM2D3	-0.338426	11.6027	-4.19696	5.16e-05	0.000786108	Down
GRAMD3	-0.55035	7.31968	-4.19622	5.18e-05	0.000787254	Down
ARRDC2	-0.230169	9.9234	-4.19615	5.18e-05	0.000787254	Down
PTP4A1	-0.497828	9.42464	-4.19595	5.18e-05	0.000787254	Down
METTL23	-0.243116	11.3474	-4.1959	5.19e-05	0.000787254	Down
IRS2	0.35838	10.8911	4.19543	5.19e-05	0.000788147	Up
TPST2	0.247925	12.0709	4.19287	5.25e-05	0.000795412	Up
AV8S2	-0.548252	7.56432	-4.19244	5.25e-05	0.000796217	Down
CNTRL	-0.273674	9.73359	-4.19206	5.26e-05	0.000796852	Down
NCF1	0.339523	13.8348	4.19056	5.29e-05	0.000800938	Up
STOML1	0.353193	5.31484	4.18914	5.32e-05	0.000804806	Up
PHOSPHO2	-0.444053	7.59105	-4.18887	5.33e-05	0.000805107	Down
EPB41L4A-AS1	-0.344574	10.2322	-4.18857	5.33e-05	0.000805497	Down
GALNT7	-0.436321	10.5433	-4.18732	5.36e-05	0.000808619	Down
PPDPF	0.444401	8.65531	4.18722	5.36e-05	0.000808619	Up
RP11-111M22.4	-0.891043	5.7913	-4.18705	5.37e-05	0.000808619	Down
ALG11	-0.267318	9.8879	-4.18411	5.43e-05	0.000817289	Down
LOC101929752	0.729344	7.49505	4.18366	5.44e-05	0.000818177	Up
TAF15	0.280093	9.00331	4.18268	5.46e-05	0.000820719	Up
HNRNPF	-0.266399	10.6966	-4.18185	5.47e-05	0.000822784	Down
M6PR	-0.263161	11.2986	-4.18007	5.51e-05	0.000827906	Down
FBXW5	0.237014	10.2361	4.17886	5.54e-05	0.000830686	Up
ESRRA	0.222969	9.71194	4.17885	5.54e-05	0.000830686	Up
TMX1	-0.781976	9.37904	-4.17824	5.55e-05	0.000832112	Down
TRAV8-3	-0.498089	8.35026	-4.17804	5.55e-05	0.0008322	Down
KLHDC8A	0.626453	6.7377	4.17564	5.61e-05	0.000839354	Up
NSUN5P1	-0.418843	8.97922	-4.17528	5.61e-05	0.000839958	Down
GSK3A	0.791208	8.45332	4.17493	5.62e-05	0.000840547	Up
LEMD3	-0.491189	10.2165	-4.17456	5.63e-05	0.000840771	Down
CCR6	-0.468228	9.04398	-4.17442	5.63e-05	0.000840771	Down
EEA1	-0.615629	6.66998	-4.17405	5.64e-05	0.000840771	Down
KIF2A	-0.490784	8.50541	-4.17403	5.64e-05	0.000840771	Down
MBD3L2	0.54324	3.70498	4.17401	5.64e-05	0.000840771	Up
TPR	-0.592723	8.14188	-4.17329	5.66e-05	0.000842557	Down
RSL24D1	-0.888798	10.0026	-4.17176	5.69e-05	0.000846975	Down
LSP1	0.557912	12.0729	4.17134	5.7e-05	0.000847777	Up
SPEF2	-0.679246	6.54193	-4.17049	5.72e-05	0.000849877	Down
SEH1L	-0.256208	10.4867	-4.17036	5.72e-05	0.000849877	Down
PPP4C	0.358362	10.4371	4.16945	5.74e-05	0.000851566	Up
CEP57	-0.39093	8.73805	-4.16928	5.74e-05	0.000851566	Down
SLC25A17	-0.256198	9.11265	-4.16925	5.74e-05	0.000851566	Down
SS18	-0.428718	8.7097	-4.16916	5.75e-05	0.000851566	Down
ASNS	-0.316314	9.37601	-4.16898	5.75e-05	0.000851617	Down
GRN	0.375738	12.1906	4.16778	5.78e-05	0.000854995	Up
ZWILCH	-0.942288	6.20222	-4.16727	5.79e-05	0.000856105	Down
SNX3	0.437525	13.277	4.16696	5.8e-05	0.000856565	Up
LOC101928784	-0.689885	7.46291	-4.16589	5.82e-05	0.000859551	Down
ACADSB	-0.879322	6.02522	-4.16436	5.85e-05	0.000864035	Down
NUFIP2	-0.313405	10.9998	-4.1638	5.87e-05	0.000865358	Down
RPH3AL	0.480066	6.88597	4.16189	5.91e-05	0.000871143	Up
FAM89A	0.297844	8.756	4.1602	5.95e-05	0.000875719	Up
FCGR1B	0.653332	11.6324	4.16019	5.95e-05	0.000875719	Up
WDR65	0.749875	6.09701	4.15864	5.98e-05	0.000880183	Up
TMX4	0.266495	11.4913	4.15852	5.99e-05	0.000880183	Up
TLR5	0.514158	10.1149	4.15706	6.02e-05	0.000884546	Up
SCN1B	0.42464	7.91741	4.15527	6.06e-05	0.000890066	Up
CMIP	0.405352	9.62675	4.15464	6.08e-05	0.000891667	Up
MAP3K8	-0.468653	10.0462	-4.15327	6.11e-05	0.00089576	Down
LDLRAD4	-0.294116	9.01314	-4.15285	6.12e-05	0.000896616	Down
NDUFA5	-0.870315	9.2835	-4.15235	6.13e-05	0.000897788	Down
ZNF22	-0.461594	10.1909	-4.15212	6.13e-05	0.000897998	Down
ELN	0.342545	3.93955	4.15192	6.14e-05	0.000898117	Up
ZNF581	0.27776	10.1555	4.15096	6.16e-05	0.000900829	Up
CDRT4	-0.316136	8.5863	-4.15045	6.17e-05	0.000901895	Down
DCLRE1B	0.36469	7.69375	4.15032	6.18e-05	0.000901895	Up
GOLGA8CP	-0.665683	8.85089	-4.1489	6.21e-05	0.000905165	Down
LINC00514	0.633317	3.32497	4.14888	6.21e-05	0.000905165	Up
MAP9	-0.92484	5.61462	-4.14881	6.21e-05	0.000905165	Down
PAN3-AS1	-0.324822	8.19666	-4.1487	6.22e-05	0.000905165	Down
MTMR1	-0.2105	11.2218	-4.14758	6.24e-05	0.000908415	Down
AKAP7	-0.431919	9.29877	-4.14743	6.25e-05	0.000908415	Down
LRIF1	-0.456286	9.75491	-4.14595	6.28e-05	0.000912803	Down
FADD	0.319509	9.51447	4.14584	6.28e-05	0.000912803	Up
WHAMMP2	-0.395768	8.38682	-4.14543	6.29e-05	0.000913678	Down
JOSD2	0.930388	6.81205	4.14452	6.32e-05	0.000916279	Up
KMT2E	-0.253671	12.2414	-4.14413	6.33e-05	0.000917058	Down
RNF135	0.261799	10.6489	4.1438	6.33e-05	0.000917635	Up
ABHD10	-0.254536	10.2062	-4.14322	6.35e-05	0.00091906	Down
ARMCX2	-0.689645	7.08456	-4.14288	6.36e-05	0.000919698	Down
RRAS2	-0.672265	7.54395	-4.14226	6.37e-05	0.000921302	Down
GPR174	-0.557851	7.26929	-4.14178	6.38e-05	0.000922397	Down
URM1	0.304703	9.45964	4.14121	6.4e-05	0.000923818	Up
PEX6	0.978082	6.21983	4.14071	6.41e-05	0.000925014	Up
RP11-483I13.5	0.508951	7.05675	4.13986	6.43e-05	0.000927416	Up
TMEM14A	-0.47521	9.29033	-4.13967	6.43e-05	0.000927507	Down
DYSF	0.749206	12.0091	4.1389	6.45e-05	0.000929648	Up
BHLHE40	-0.418998	7.96769	-4.13862	6.46e-05	0.000930081	Down
GPN2	0.273339	8.80132	4.13798	6.48e-05	0.000930964	Up
APLNR	0.608722	5.04871	4.13795	6.48e-05	0.000930964	Up
C2orf72	0.2957	8.47176	4.13787	6.48e-05	0.000930964	Up
GLTP	0.233628	10.7203	4.13528	6.54e-05	0.000939572	Up
TLK1	-0.423074	10.8515	-4.13498	6.55e-05	0.000939572	Down
ZSCAN25	-0.565224	7.72115	-4.13497	6.55e-05	0.000939572	Down
LINC00621	-0.633893	9.62446	-4.1339	6.58e-05	0.000942685	Down
ZNF883	-1.04905	5.04091	-4.13371	6.58e-05	0.000942685	Down
HHLA1	0.469324	5.91529	4.13355	6.59e-05	0.000942685	Up
HDAC5	0.311004	10.7874	4.13345	6.59e-05	0.000942685	Up
RNF130	0.960019	3.98328	4.13196	6.63e-05	0.000947461	Up
NPC1	-0.313634	10.1578	-4.13169	6.63e-05	0.000947849	Down
C18orf21	-0.708487	5.68867	-4.1315	6.64e-05	0.000947933	Down
ADRM1	0.21278	10.9153	4.13105	6.65e-05	0.000948969	Up
TMEM110	0.286779	8.35714	4.13028	6.67e-05	0.000951161	Up
LOC100507156	0.410163	8.0275	4.12923	6.7e-05	0.000954395	Up
CD48	-0.354724	13.7309	-4.12865	6.71e-05	0.000955798	Down
MS4A1	-0.626817	11.5267	-4.12852	6.71e-05	0.000955798	Down
KIFAP3	-0.347971	9.90575	-4.1264	6.77e-05	0.000962934	Down
NUP205	-0.280539	9.20879	-4.12559	6.79e-05	0.000965316	Down
ARRDC3	-0.454069	11.7572	-4.12535	6.8e-05	0.000965577	Down
RGS18	-0.603985	11.9859	-4.12494	6.81e-05	0.000966498	Down
CES1P1	0.720093	4.62433	4.12422	6.82e-05	0.000968376	Up
MSR1	0.775116	6.16108	4.12399	6.83e-05	0.000968376	Up
ARID3A	0.314103	9.41641	4.12394	6.83e-05	0.000968376	Up
FAH	0.435576	8.69843	4.12378	6.84e-05	0.000968376	Up
IGF2R	0.542449	13.0599	4.12248	6.87e-05	0.000972587	Up
ERBB2IP	-0.451312	11.7544	-4.12204	6.88e-05	0.000973604	Down
ABLIM1	-0.45033	11.9075	-4.12164	6.89e-05	0.000974481	Down
RAN	-0.630638	9.61284	-4.121	6.91e-05	0.000975937	Down
HIST1H2BE	0.379141	9.78064	4.12093	6.91e-05	0.000975937	Up
MGAT4A	-0.709892	6.15553	-4.12048	6.92e-05	0.000977007	Down
FITM1	0.548235	7.25832	4.11915	6.96e-05	0.00098136	Up
IMMP1L	-0.673131	7.43569	-4.11834	6.98e-05	0.000983776	Down
TREM2	0.369089	4.58876	4.11813	6.98e-05	0.000983939	Up
RAB13	0.395459	8.22986	4.11742	7e-05	0.000985402	Up
SLC35B4	-0.216681	9.27329	-4.11742	7e-05	0.000985402	Down
WDR20	-0.536062	6.43197	-4.11681	7.02e-05	0.000986611	Down
MOSPD3	0.400951	8.64257	4.11658	7.03e-05	0.000986611	Up
ATG4C	-0.744474	7.66526	-4.11647	7.03e-05	0.000986611	Down
STT3B	-0.38499	11.8981	-4.11645	7.03e-05	0.000986611	Down
FKBP1A	0.405687	11.7596	4.11579	7.05e-05	0.000988475	Up
TMEM117	-1.00834	4.66457	-4.11543	7.06e-05	0.000988711	Down
IRAK1BP1	-0.597231	6.41495	-4.11541	7.06e-05	0.000988711	Down
PAK1	0.513798	7.58374	4.1149	7.07e-05	0.00098976	Up
SELPLG	0.343703	13.1727	4.11481	7.07e-05	0.00098976	Up
PKM	0.577763	9.71628	4.11434	7.09e-05	0.000990911	Up
UNG	-0.407642	9.35315	-4.11411	7.09e-05	0.00099119	Down
PVR	0.330982	8.97609	4.1131	7.12e-05	0.000994382	Up
MRPL42	-0.693407	8.9081	-4.11211	7.15e-05	0.000997389	Down
LINC00263	-0.417141	9.09766	-4.11199	7.15e-05	0.000997389	Down
SDPR	-0.423273	9.35675	-4.11102	7.18e-05	0.00100025	Down
SNORA76C	-0.437201	9.13521	-4.11091	7.18e-05	0.00100025	Down
PEX1	-0.577714	8.2071	-4.11025	7.2e-05	0.00100218	Down
SYNJ2BP	-0.337289	8.25437	-4.10975	7.21e-05	0.00100288	Down
MPHOSPH8	-0.245226	10.0882	-4.10974	7.21e-05	0.00100288	Down
HIST1H2AM	0.856238	6.0706	4.10953	7.22e-05	0.00100307	Up
RTP5	0.319254	4.10505	4.10869	7.24e-05	0.00100564	Up
RTN2	0.853568	6.07485	4.10854	7.24e-05	0.00100564	Up
ADARB1	-0.46427	8.82221	-4.10702	7.29e-05	0.00101084	Down
C15orf40	-0.287108	9.3188	-4.10664	7.3e-05	0.0010117	Down
ZNF41	-0.816167	6.40271	-4.10583	7.32e-05	0.00101421	Down
MBNL1	-0.531718	8.47044	-4.10523	7.34e-05	0.00101591	Down
MAP2K4	-0.260964	10.162	-4.1039	7.37e-05	0.00101962	Down
C19orf54	0.286794	8.91297	4.10388	7.37e-05	0.00101962	Up
CHIT1	0.879792	6.13923	4.10368	7.38e-05	0.00101962	Up
NAA16	-0.603721	7.17393	-4.10363	7.38e-05	0.00101962	Down
MCF2L	0.908251	5.71697	4.10305	7.4e-05	0.00102125	Up
CTD-2537I9.16	0.446725	7.62044	4.10254	7.41e-05	0.0010226	Up
NKRF	-0.287959	9.16809	-4.10217	7.42e-05	0.00102344	Down
RP11-25I15.3	0.355254	7.96766	4.10142	7.44e-05	0.00102571	Up
PRPF4B	-0.317781	10.4993	-4.10111	7.45e-05	0.00102632	Down
PHC2	0.488045	12.989	4.09916	7.51e-05	0.0010333	Up
UBA2	-0.448867	11.1932	-4.09887	7.51e-05	0.00103382	Down
CARM1	0.580894	10.5841	4.09802	7.54e-05	0.00103657	Up
GTF3C6	0.208807	11.183	4.09533	7.62e-05	0.00104655	Up
DKFZP434H168	0.721944	5.95977	4.09505	7.62e-05	0.00104681	Up
INSIG2	-0.554408	8.56803	-4.09495	7.63e-05	0.00104681	Down
MAGEE1	-0.487012	7.82052	-4.09449	7.64e-05	0.00104778	Down
C10orf88	-0.341628	8.06711	-4.09439	7.64e-05	0.00104778	Down
FOXP1	-0.269479	9.9946	-4.094	7.66e-05	0.00104871	Down
DDRGK1	0.213293	9.94305	4.09351	7.67e-05	0.00104989	Up
KDM4C	-0.554322	7.90061	-4.09338	7.67e-05	0.00104989	Down
OXNAD1	-0.364113	9.82413	-4.09293	7.69e-05	0.00105044	Down
TUBA4A	0.32327	13.0642	4.09293	7.69e-05	0.00105044	Up
ABHD3	-0.637353	11.7635	-4.09243	7.7e-05	0.00105178	Down
TSTA3	0.638817	11.153	4.09043	7.76e-05	0.00105897	Up
CHCHD7	-0.433358	9.038	-4.09019	7.77e-05	0.00105897	Down
DDX46	-0.291578	11.2137	-4.09016	7.77e-05	0.00105897	Down
COL7A1	0.71687	6.54067	4.08785	7.84e-05	0.00106731	Up
NLRC3	-0.385842	11.7558	-4.08778	7.84e-05	0.00106731	Down
MFAP2	0.649728	6.75506	4.08738	7.85e-05	0.00106829	Up
C10orf11	0.314252	8.59216	4.08689	7.86e-05	0.00106964	Up
ARPP19	-0.383208	8.51705	-4.08177	8.02e-05	0.00108991	Down
DLC1	0.612012	6.86758	4.0789	8.11e-05	0.00110116	Up
GRAMD1A	0.399225	9.3402	4.07856	8.12e-05	0.00110193	Up
EMC2	-0.418057	8.62464	-4.07686	8.17e-05	0.00110786	Down
AMMECR1	-0.566494	6.88899	-4.07683	8.17e-05	0.00110786	Down
LHFPL2	0.391017	8.87966	4.07631	8.19e-05	0.00110936	Up
BTN2A1	-0.339475	10.9698	-4.07593	8.2e-05	0.00110996	Down
ACTR2	-0.367361	11.4804	-4.07586	8.2e-05	0.00110996	Down
FTSJ1	-0.269408	10.0615	-4.07548	8.21e-05	0.00111089	Down
VDAC1	-0.251763	11.627	-4.07438	8.25e-05	0.00111486	Down
MED14	-0.253443	9.06375	-4.07401	8.26e-05	0.00111574	Down
NAP1L3	-0.729122	6.8857	-4.07381	8.26e-05	0.00111594	Down
INPP5J	0.677432	4.99948	4.07274	8.3e-05	0.00111981	Up
MAPKAPK5-AS1	-0.259299	9.75866	-4.07249	8.3e-05	0.0011202	Down
MORC3	-0.47312	11.1199	-4.072	8.32e-05	0.00112162	Down
TOP2B	-0.298504	11.9453	-4.07171	8.33e-05	0.00112188	Down
CNN2	0.307781	12.5636	4.07162	8.33e-05	0.00112188	Up
DEK	-0.559115	11.785	-4.07145	8.34e-05	0.00112194	Down
C14orf28	-0.579896	8.08056	-4.07027	8.37e-05	0.00112631	Down
MOB3B	0.545245	7.08855	4.06993	8.39e-05	0.0011271	Up
TNFRSF1A	0.360866	12.4229	4.06968	8.39e-05	0.00112748	Up
LRFN1	0.380797	7.8297	4.06881	8.42e-05	0.00113052	Up
SNX11	0.263624	10.3714	4.06866	8.43e-05	0.00113052	Up
WRN	-0.646722	7.27304	-4.06807	8.44e-05	0.00113236	Down
SRPK2	-0.351321	10.6091	-4.06723	8.47e-05	0.0011351	Down
RPS6KA1	0.321852	11.9045	4.06712	8.47e-05	0.0011351	Up
PRKCDBP	0.904234	5.39262	4.06504	8.54e-05	0.0011434	Up
ZC3H8	-0.461794	8.51736	-4.06343	8.59e-05	0.00114965	Down
ALDH18A1	-0.330227	8.71401	-4.06326	8.6e-05	0.00114972	Down
C2orf68	-0.227954	9.35568	-4.06264	8.62e-05	0.00115178	Down
TSPAN13	-0.587177	8.84011	-4.06127	8.66e-05	0.00115706	Down
TSEN2	-0.347715	8.43113	-4.06032	8.69e-05	0.0011605	Down
PARVB	0.551554	8.86494	4.05978	8.71e-05	0.00116223	Up
ATP6V0C	0.535289	13.019	4.05934	8.73e-05	0.00116325	Up
RNF38	-0.219325	11.284	-4.05923	8.73e-05	0.00116325	Down
KLRG1	-0.453065	10.958	-4.05869	8.75e-05	0.00116489	Down
PDE4B	-0.367753	10.927	-4.05855	8.75e-05	0.00116489	Down
STRN4	0.402242	8.5483	4.05833	8.76e-05	0.00116505	Up
GEN1	-1.04329	5.47607	-4.05821	8.76e-05	0.00116505	Down
FANCF	-0.484867	9.06112	-4.05788	8.77e-05	0.00116578	Down
LOC100130938	0.457654	7.81901	4.05762	8.78e-05	0.00116628	Up
FOXP1-IT1	0.334631	9.11283	4.05708	8.8e-05	0.00116798	Up
ENO1	0.288871	12.8381	4.0565	8.82e-05	0.0011692	Up
LOC100289283	0.441784	7.39322	4.05639	8.82e-05	0.0011692	Up
MMEL1	0.300272	8.30975	4.05634	8.83e-05	0.0011692	Up
DNAJC10	-0.534082	8.37756	-4.05489	8.87e-05	0.00117438	Down
OS9	0.397634	11.8708	4.05486	8.88e-05	0.00117438	Up
MLYCD	-0.309674	8.895	-4.05448	8.89e-05	0.00117538	Down
PIGN	-0.692824	7.54907	-4.05412	8.9e-05	0.00117629	Down
ZNF782	-0.854013	6.37571	-4.0532	8.93e-05	0.0011797	Down
DCTN3	0.221002	11.5306	4.05123	9e-05	0.00118779	Up
SYT6	0.505943	7.01759	4.05062	9.02e-05	0.00118817	Up
FBXO8	-0.325682	9.4931	-4.05057	9.02e-05	0.00118817	Down
TRIM56	0.237815	11.2922	4.05031	9.03e-05	0.00118817	Up
INPP5E	-0.321839	9.01923	-4.05023	9.03e-05	0.00118817	Down
EXOC8	-0.493467	10.1171	-4.05016	9.03e-05	0.00118817	Down
HMGB1	-0.445721	11.4145	-4.05015	9.03e-05	0.00118817	Down
POLI	-0.567112	8.22191	-4.05007	9.04e-05	0.00118817	Down
MPHOSPH9	-0.337956	9.71904	-4.04933	9.06e-05	0.00119037	Down
HSPA8	-0.265776	13.8954	-4.04928	9.06e-05	0.00119037	Down
GLYR1	-0.329088	12.4757	-4.0483	9.1e-05	0.00119401	Down
HSPE1-MOB4	-0.620805	9.6608	-4.04816	9.1e-05	0.00119401	Down
AATK	0.325262	11.1543	4.0478	9.11e-05	0.00119495	Up
TPD52	-0.528537	9.06976	-4.0473	9.13e-05	0.00119603	Down
SLC7A5	0.522136	9.33322	4.04725	9.13e-05	0.00119603	Up
YWHAZ	-0.287399	13.7974	-4.04688	9.15e-05	0.00119704	Down
SCP2	-0.293244	11.5463	-4.04602	9.18e-05	0.00120022	Down
GNPNAT1	-0.329149	8.89341	-4.04584	9.18e-05	0.00120033	Down
LOC102725438	0.411182	7.41686	4.04542	9.2e-05	0.00120155	Up
HELQ	-0.40369	7.77245	-4.04448	9.23e-05	0.0012051	Down
DEF6	-0.269311	9.44383	-4.04203	9.31e-05	0.00121556	Down
SERINC1	-0.369527	12.5933	-4.04168	9.33e-05	0.00121611	Down
LOC100289230	-0.383029	8.98681	-4.04161	9.33e-05	0.00121611	Down
TIGD7	-0.566563	7.31747	-4.04095	9.35e-05	0.00121844	Down
CLDN6	0.822277	6.13373	4.04062	9.36e-05	0.00121926	Up
HIST1H2BH	0.386101	9.25089	4.04047	9.37e-05	0.00121926	Up
REEP3	-0.440482	9.86224	-4.03962	9.4e-05	0.00122246	Down
ARHGEF15	0.537668	7.29068	4.03877	9.43e-05	0.00122501	Up
LOC729870	0.590916	7.98766	4.03876	9.43e-05	0.00122501	Up
A2M-AS1	-0.623565	10.7864	-4.03798	9.46e-05	0.00122739	Down
FES	0.387916	10.2309	4.03794	9.46e-05	0.00122739	Up
POLR3F	-0.340296	8.20312	-4.0371	9.49e-05	0.0012306	Down
UBTD1	0.417389	7.78631	4.03658	9.51e-05	0.00123227	Up
MIER1	-0.437312	8.62106	-4.03638	9.51e-05	0.00123251	Down
RGPD3	-0.354312	9.40097	-4.03607	9.53e-05	0.00123328	Down
TIMM17A	-0.359687	9.43739	-4.0357	9.54e-05	0.00123428	Down
SEL1L	-0.313013	11.5825	-4.03436	9.59e-05	0.0012398	Down
DPM2	0.484326	10.9566	4.03415	9.59e-05	0.00124006	Up
RRM1	-0.32796	8.83163	-4.03287	9.64e-05	0.00124533	Down
MAP1B	0.592207	6.51496	4.03244	9.66e-05	0.00124665	Up
CEMIP	0.50984	4.23927	4.03105	9.71e-05	0.00125246	Up
RANBP3	0.73962	7.27768	4.03003	9.74e-05	0.00125655	Up
LBX2-AS1	0.452397	8.09635	4.02978	9.75e-05	0.00125703	Up
CSPP1	-0.513491	6.61711	-4.02941	9.77e-05	0.00125778	Down
NSMAF	-0.725312	6.86115	-4.02932	9.77e-05	0.00125778	Down
RUFY1	0.199353	11.9559	4.0288	9.79e-05	0.00125952	Up
UGDH	-0.338052	8.65644	-4.027	9.86e-05	0.00126736	Down
PGM1	0.279354	10.8247	4.02683	9.86e-05	0.00126743	Up
C11orf68	0.312108	10.8108	4.02579	9.9e-05	0.00127168	Up
TRMT1L	-0.398496	8.69606	-4.02516	9.92e-05	0.00127398	Down
CBLN4	0.583914	5.01127	4.02346	9.99e-05	0.00128138	Up
CGB1	0.694656	7.1093	4.02308	0.000100013	0.0012825	Up
MFN1	-0.478667	8.57115	-4.0228	0.000100117	0.00128311	Down
SERPINA1	0.45063	13.8325	4.02088	0.00010084	0.00129166	Up
RAP1B	-0.375002	13.8157	-4.02069	0.000100912	0.00129186	Down
MTMR3	0.32064	11.498	4.01881	0.000101624	0.00130024	Up
C6orf120	-0.336894	9.89584	-4.0186	0.000101704	0.00130054	Down
ARL1	-0.494176	7.27521	-4.0168	0.000102392	0.00130826	Down
ADD3	-0.456647	12.9644	-4.0167	0.00010243	0.00130826	Down
ITM2A	-0.440068	11.7243	-4.01658	0.00010248	0.00130826	Down
WDR44	-0.320335	9.45696	-4.01606	0.000102676	0.00131003	Down
MORF4L2	-0.339058	11.8133	-4.0159	0.000102739	0.0013101	Down
MGAT4B	0.298948	9.51198	4.01448	0.000103287	0.00131604	Up
CLLU1	-0.994462	5.52425	-4.01439	0.000103319	0.00131604	Down
CDC7	-0.402454	8.36254	-4.01388	0.000103517	0.00131782	Down
SEC23IP	-0.752108	6.91179	-4.01274	0.00010396	0.00132273	Down
IMPA1	-0.472213	10.341	-4.01187	0.000104301	0.001326	Down
LOC101928370	-0.50609	7.35852	-4.01178	0.000104333	0.001326	Down
ASPHD2	0.244041	9.40267	4.01095	0.000104657	0.00132925	Up
CD82	0.394991	10.4676	4.01083	0.000104705	0.00132925	Up
PRDM15	-0.314046	8.99363	-4.00941	0.000105262	0.00133558	Down
TARDBP	-0.228422	11.8229	-4.00899	0.000105428	0.00133694	Down
TRAPPC5	0.31436	11.5407	4.00835	0.00010568	0.00133939	Up
RYK	-0.378567	10.1792	-4.00804	0.000105802	0.00133965	Down
ZNHIT3	-0.427959	9.3586	-4.00801	0.000105817	0.00133965	Down
RAB21	-0.420118	10.6961	-4.00779	0.000105904	0.00133968	Down
SFTPB	0.869099	5.75603	4.00771	0.000105937	0.00133968	Up
WIPF2	0.338235	10.8425	4.00705	0.000106195	0.00134221	Up
EFR3A	-0.365453	11.2109	-4.00686	0.000106271	0.00134242	Down
ANXA5	0.235916	12.9212	4.00645	0.000106435	0.00134375	Up
METAP1	-0.272263	10.4685	-4.00626	0.000106509	0.00134395	Down
NAB1	-0.757443	6.51675	-4.00476	0.000107108	0.00135075	Down
FAM179B	-0.587392	8.44861	-4.00266	0.000107951	0.0013602	Down
PLA2G15	0.299764	7.84583	4.0026	0.000107976	0.0013602	Up
COA5	-0.301957	9.44167	-4.00171	0.000108335	0.0013636	Down
BAZ2A	0.462577	8.98679	4.00164	0.000108365	0.0013636	Up
NMD3	-0.734424	8.00951	-4.00144	0.000108447	0.00136388	Down
EMC1	-0.336756	8.40244	-4.00126	0.000108518	0.00136402	Down
CAV1	0.745809	6.20659	4.00028	0.000108915	0.00136826	Up
MT1X	0.31302	11.2085	3.99781	0.000109924	0.00138018	Up
LRCH1	0.498817	6.93697	3.99741	0.000110089	0.0013809	Up
EDEM3	-0.349105	9.0534	-3.99738	0.000110102	0.0013809	Down
PTPN6	0.429508	12.9567	3.99655	0.000110442	0.00138418	Up
RIOK1	-0.294858	9.06532	-3.99636	0.000110521	0.00138418	Down
MYADM	0.435606	11.5991	3.9963	0.000110546	0.00138418	Up
BC047484	-0.317206	8.89172	-3.99548	0.000110884	0.00138743	Down
SNHG8	-0.583186	8.66707	-3.99538	0.000110927	0.00138743	Down
CLCC1	-0.677687	6.92013	-3.9949	0.000111125	0.00138915	Down
NELFCD	-0.273889	10.9078	-3.99475	0.000111188	0.00138918	Down
SLFN5	-0.415	8.49374	-3.99433	0.000111362	0.0013906	Down
RAD23A	0.505449	11.9836	3.99276	0.000112017	0.00139801	Up
RP4-545K15.5	0.431225	7.20651	3.99257	0.000112096	0.00139823	Up
CTB-50L17.7	0.687902	6.95556	3.99221	0.000112247	0.00139935	Up
LOC101243545	-0.695378	11.1606	-3.99177	0.000112431	0.00140088	Down
LOC100506713	-0.543067	7.99346	-3.99016	0.000113106	0.00140853	Down
ZNF624	-0.689269	6.8169	-3.98983	0.000113248	0.00140952	Down
DLG4	0.511776	7.02407	3.98903	0.000113585	0.00141295	Up
TFAM	-0.272247	9.70329	-3.98841	0.000113848	0.00141545	Down
KIF3B	0.228493	9.71534	3.98695	0.000114468	0.00142239	Up
SELP	0.437882	10.1208	3.98659	0.000114622	0.00142352	Up
GMPR	0.657211	12.6396	3.98604	0.000114857	0.00142567	Up
MYO7A	0.439391	4.88133	3.98461	0.000115471	0.00143191	Up
CYSTM1	0.624073	11.704	3.98448	0.000115527	0.00143191	Up
PPM1M	0.336358	10.8898	3.98443	0.000115547	0.00143191	Up
ABHD4	0.281452	10.9705	3.98421	0.000115639	0.00143228	Up
TPP1	0.363235	11.5515	3.9837	0.000115861	0.0014327	Up
LOC286052	-0.286029	10.2013	-3.98369	0.000115864	0.0014327	Down
TSC22D4	0.384186	10.09	3.98364	0.000115885	0.0014327	Up
RSU1P2	0.92419	5.28639	3.98355	0.000115924	0.0014327	Up
SRFBP1	-0.41762	6.62669	-3.98338	0.000115999	0.00143284	Down
VHL	0.254497	9.39873	3.98312	0.00011611	0.00143344	Up
ANKRD24	0.868053	4.50526	3.98288	0.000116214	0.00143396	Up
LOXL2	0.50703	3.46979	3.98243	0.00011641	0.0014356	Up
LINC00491	0.436111	8.79798	3.98227	0.000116479	0.00143567	Up
PHF1	-0.385241	8.92995	-3.98133	0.000116887	0.00143992	Down
TMPRSS11D	0.42059	8.07525	3.98111	0.000116984	0.00144034	Up
AC005523.2	0.422838	7.37813	3.97992	0.000117503	0.00144596	Up
AK3	-0.279821	9.1901	-3.9788	0.000117994	0.00145122	Down
PPP2R3A	0.741714	5.19478	3.97817	0.000118271	0.00145384	Up
GIMAP1-GIMAP5	-0.617053	8.36356	-3.9773	0.000118655	0.00145778	Down
SNHG6	-0.338391	11.8934	-3.97663	0.000118948	0.0014606	Down
COX17	-0.644592	7.93431	-3.97585	0.000119292	0.00146404	Down
TGDS	-0.380459	9.01695	-3.97546	0.000119469	0.00146485	Down
ANKRD20A12P	0.691696	6.34142	3.97542	0.000119486	0.00146485	Up
ANP32E	-0.399106	8.96926	-3.97514	0.000119612	0.0014656	Down
CMTM4	0.74183	6.48067	3.97302	0.000120556	0.00147638	Up
DFNB59	-0.511824	6.54223	-3.97271	0.000120694	0.00147658	Down
SELT	-0.395636	11.9388	-3.9727	0.000120702	0.00147658	Down
PPIL4	-0.63086	8.48076	-3.97149	0.000121244	0.00148241	Down
HECTD3	0.487207	9.14685	3.97055	0.000121669	0.00148682	Up
TSPAN14	0.357404	11.74	3.97011	0.000121865	0.00148804	Up
MRPS21	-0.402337	9.99877	-3.97004	0.000121899	0.00148804	Down
RPS18	-0.4546	14.3248	-3.96772	0.000122952	0.0015001	Down
SNX9	-0.292508	8.21018	-3.96739	0.000123105	0.00150115	Down
ZNF383	-0.563902	6.87999	-3.96721	0.000123187	0.00150136	Down
TCF25	0.317765	11.4417	3.96679	0.000123377	0.00150287	Up
LILRB3	0.558994	11.6504	3.96658	0.000123474	0.00150325	Up
DPY19L2P2	-0.610255	6.93869	-3.96628	0.000123611	0.00150385	Down
GSE1	-0.389067	9.37897	-3.96619	0.000123655	0.00150385	Down
ANAPC1	-0.386592	8.91841	-3.96467	0.000124355	0.00151156	Down
DCTN2	0.181706	11.0995	3.96409	0.000124621	0.001514	Up
KIF3C	0.360156	7.95252	3.96394	0.000124689	0.00151401	Up
PRSS54	0.702467	4.85031	3.96069	0.000126204	0.0015316	Up
PLEKHF2	-0.559122	10.848	-3.96054	0.000126275	0.00153164	Down
DHTKD1	0.342964	9.71643	3.96016	0.00012645	0.00153295	Up
NDST2	0.840161	4.76329	3.95786	0.000127535	0.00154529	Up
ITPR1	-0.282412	10.1803	-3.9571	0.000127891	0.00154878	Down
REPS1	-0.511661	7.68513	-3.95636	0.000128244	0.00155224	Down
KDM2A	0.406315	9.15541	3.95598	0.000128427	0.00155238	Up
S100A11	0.534227	14.0774	3.95592	0.000128452	0.00155238	Up
CXorf65	-0.327985	9.04841	-3.95591	0.00012846	0.00155238	Down
KIRREL	0.87075	4.80013	3.95542	0.00012869	0.00155371	Up
MIR186	-0.479139	7.0067	-3.95534	0.00012873	0.00155371	Down
EPS15L1	0.338487	9.2609	3.95525	0.000128774	0.00155371	Up
CTD-2528L19.6	-0.601967	7.69131	-3.9548	0.000128986	0.00155488	Down
USP4	0.286902	12.8671	3.95476	0.000129007	0.00155488	Up
NAP1L1	-0.769099	7.65165	-3.95426	0.000129248	0.00155623	Down
GORAB	-0.528124	8.11692	-3.95424	0.000129255	0.00155623	Down
AKAP10	-0.321846	8.4358	-3.954	0.00012937	0.0015568	Down
GOLPH3	-0.262216	12.0976	-3.95345	0.000129633	0.00155914	Down
CIPC	-0.310672	8.65943	-3.9532	0.000129753	0.00155977	Down
MED17	-0.26241	10.02	-3.95239	0.000130143	0.00156363	Down
MSRB3	0.383784	9.08954	3.9517	0.000130478	0.00156683	Up
RP11-769O8.3	0.561984	6.36967	3.95112	0.000130757	0.00156935	Up
KHDRBS1	-0.270801	12.2885	-3.95027	0.000131171	0.0015735	Down
ZC3H7A	-0.341701	10.1577	-3.94998	0.000131312	0.00157436	Down
FAM111A	-0.284258	11.5645	-3.94932	0.000131631	0.00157736	Down
KATNB1	0.311308	10.2738	3.94865	0.000131957	0.00158045	Up
PRKCH	-0.451921	10.9018	-3.94825	0.000132155	0.00158199	Down
TCF7L2	0.63766	7.32855	3.94798	0.000132287	0.00158274	Up
RP11-998D10.7	0.437025	3.26324	3.94741	0.000132566	0.00158525	Up
DHX32	0.243021	9.09182	3.94655	0.000132987	0.00158945	Up
ABCC10	-0.288598	9.75263	-3.94632	0.000133103	0.00159	Down
ZNF101	-0.305909	8.99896	-3.94545	0.000133532	0.00159369	Down
YIPF1	0.279339	10.2624	3.94541	0.000133551	0.00159369	Up
MEF2BNB	0.234458	10.8262	3.94513	0.000133687	0.00159448	Up
EZH2	-0.353896	7.84968	-3.94428	0.00013411	0.00159869	Down
NACC1	0.286713	8.34064	3.94344	0.000134529	0.00160257	Up
RWDD4	-0.373898	9.08167	-3.94332	0.000134585	0.00160257	Down
B9D1	0.867298	5.09959	3.9432	0.000134646	0.00160257	Up
C12orf79	-0.646448	6.73612	-3.94145	0.000135521	0.00161215	Down
TRIT1	-0.235883	9.42625	-3.94117	0.000135658	0.00161294	Down
TTLL7	0.773158	4.84141	3.94059	0.00013595	0.00161558	Up
UNC50	-0.232582	10.6189	-3.93899	0.000136759	0.00162434	Down
NFKBIZ	0.338861	10.1354	3.9351	0.000138738	0.00164699	Up
SLC9A6	-0.253356	10.6273	-3.93394	0.000139332	0.00165241	Down
PTAR1	-0.447874	10.7045	-3.93393	0.000139339	0.00165241	Down
GPAA1	0.239297	10.0685	3.93327	0.000139676	0.00165554	Up
EIF4E	-0.344747	9.83327	-3.93302	0.000139806	0.00165623	Down
LOC100240734	0.469216	6.82505	3.93253	0.00014006	0.00165838	Up
CDK16	0.393733	8.00792	3.93045	0.000141137	0.00166934	Up
ZNF326	-0.555906	7.85518	-3.93038	0.000141176	0.00166934	Down
LCP1	0.201664	14.7444	3.93032	0.000141204	0.00166934	Up
PIGL	-0.563597	6.77668	-3.92986	0.000141443	0.0016713	Down
ZNF217	-0.336734	12.5296	-3.92965	0.000141557	0.00167177	Down
RREB1	-0.157088	10.9667	-3.9282	0.000142315	0.00167986	Down
MTO1	-0.300875	9.7833	-3.92755	0.000142657	0.00168303	Down
HEATR5A	-0.356726	9.29717	-3.92565	0.000143661	0.001694	Down
LOC147004	0.350648	7.63326	3.92459	0.000144223	0.00169975	Up
LOC100287896	-0.558638	6.90686	-3.92379	0.000144647	0.00170302	Down
SFT2D3	-0.378894	8.03307	-3.92379	0.000144649	0.00170302	Down
ROGDI	0.464279	10.266	3.92357	0.000144763	0.00170348	Up
TADA2B	0.246343	10.3784	3.92274	0.000145209	0.0017075	Up
LINC00943	0.646429	6.75479	3.92265	0.000145254	0.0017075	Up
PRPS2	-0.312613	9.66062	-3.92219	0.000145504	0.00170956	Down
NUP155	-0.37016	8.03563	-3.92123	0.000146018	0.00171471	Down
PGBD2	-0.453102	7.43088	-3.92071	0.000146298	0.00171712	Down
AADAT	0.694342	6.13394	3.91967	0.000146858	0.00172219	Up
ARAF	0.301078	10.5977	3.91963	0.000146881	0.00172219	Up
LOC100506585	0.411138	7.95684	3.91756	0.000148006	0.0017345	Up
LTBP3	-0.60779	8.32646	-3.91739	0.000148096	0.00173466	Down
ZFYVE21	-0.255701	8.28314	-3.91637	0.000148655	0.00174033	Down
CDK2	-0.220623	9.01556	-3.91564	0.000149054	0.0017441	Down
WTAP	-0.430695	7.46168	-3.91547	0.000149148	0.0017443	Down
ANK3	-0.523386	8.46573	-3.91522	0.000149286	0.00174502	Down
IMP3	-0.324758	11.016	-3.91492	0.000149447	0.00174602	Down
C19orf26	0.448389	3.92233	3.91477	0.000149531	0.00174611	Up
C22orf42	0.655126	6.34637	3.91363	0.000150159	0.00175208	Up
LCE3D	0.464273	7.92847	3.91349	0.000150238	0.00175208	Up
FMR1	-0.480858	10.9069	-3.91343	0.000150273	0.00175208	Down
UQCRC1	0.261009	11.5757	3.9131	0.000150451	0.00175327	Up
HNRNPA2B1	-0.259586	12.5646	-3.91164	0.000151263	0.00176183	Down
LOC728353	0.733168	6.74306	3.91144	0.000151377	0.00176226	Up
KIF18B	0.477038	6.68573	3.91116	0.00015153	0.00176315	Up
ERVK3-1	-0.273667	10.162	-3.91059	0.000151848	0.00176594	Down
GDI2	-0.345227	11.7346	-3.91014	0.000152102	0.00176801	Down
ATP6V0A1	0.41465	8.23928	3.9094	0.000152516	0.00177191	Up
NKIRAS2	0.3254	9.00522	3.90874	0.000152882	0.00177525	Up
ERCC1	0.263158	10.0279	3.90861	0.000152959	0.00177525	Up
MOGAT3	0.645886	6.0842	3.90829	0.000153138	0.00177577	Up
DHX15	-0.361374	12.4004	-3.90823	0.000153172	0.00177577	Down
PCMTD1	-0.746777	10.208	-3.90812	0.000153236	0.00177577	Down
BNIP3	-0.343296	7.99769	-3.90759	0.000153532	0.0017783	Down
OSBPL3	-0.35362	8.82215	-3.90672	0.000154023	0.0017829	Down
LOC102723927	-0.841235	3.79506	-3.90627	0.000154281	0.0017829	Down
MRPL34	-0.292488	10.0808	-3.90597	0.000154448	0.0017829	Down
TMEM127	0.261743	11.5464	3.90591	0.000154483	0.0017829	Up
RP11-680F20.10	0.631273	6.18079	3.90589	0.000154493	0.0017829	Up
HMX1	0.759227	6.34621	3.90586	0.000154511	0.0017829	Up
PRIMPOL	-0.333264	9.03022	-3.90582	0.000154532	0.0017829	Down
MT1F	0.273235	10.2385	3.90579	0.000154553	0.0017829	Up
RP11-21L23.2	0.659654	5.73718	3.90562	0.000154649	0.00178311	Up
DPH7	-0.447491	8.32286	-3.90495	0.000155028	0.00178657	Down
RPS10P2	-0.585959	7.74179	-3.90443	0.000155323	0.00178907	Down
PGD	0.410914	8.435	3.90397	0.000155585	0.00179115	Up
PGLS	0.276608	9.38937	3.90384	0.00015566	0.00179115	Up
SDCCAG3	-0.402327	8.58913	-3.90342	0.000155899	0.001793	Down
GIMAP6	-0.389544	11.8516	-3.90266	0.000156336	0.0017965	Down
SFR1	-0.350988	8.50324	-3.90262	0.000156361	0.0017965	Down
PMAIP1	-0.603561	9.1283	-3.90226	0.000156569	0.00179774	Down
MAPK9	-0.302928	9.76388	-3.90201	0.000156711	0.00179774	Down
CARD9	0.385987	8.58487	3.90197	0.000156732	0.00179774	Up
RP11-217B7.2	0.73722	5.25123	3.90189	0.000156783	0.00179774	Up
CEND1	0.635538	4.85698	3.90095	0.000157323	0.00180303	Up
UBA5	-0.396725	8.30438	-3.90063	0.000157509	0.00180425	Down
STAG3L4	-0.517938	6.796	-3.90046	0.000157603	0.00180443	Down
LOC101928851	0.869959	5.64868	3.90017	0.000157772	0.00180545	Up
[truncated: 6,909 more rows]
