# Supplementary material for: Elucidation of the anti-colorectal cancer mechanism of Atractylodes lancea by network pharmacology and experimental verification
Source: Aging (Albany NY). 2024 Aug 22;16(16):12008–28. doi: 10.18632/aging.206075 (PMC11386916; doi:10.18632/aging.206075)
Supplement: Supplementary Table 6 [file aging-16-206075-s006.xlsx]

## Sheet: GL Wang et al. Supplementary.Ta
Supplementary Table 6. Differentially expression genes of colorectal cancer in TCGA.
Gene name	logFC	AveExpr	t	P.Value	adj.P.Val	status
OTOP2	-9.37403	1.89562	-44.4854	1.38e-163	1.71e-159	Down
CDH3	6.24654	10.029	44.4616	1.67e-163	1.71e-159	Up
AADACL2	-2.7157	0.399051	-41.4366	9.02e-153	6.18e-149	Down
DHRS7C	-2.84069	0.442538	-39.14	2.65e-144	1.2e-140	Down
KRT80	6.60957	8.70142	39.1288	2.92e-144	1.2e-140	Up
OTOP3	-4.49408	0.71481	-38.9017	2.08e-143	7.12e-140	Down
ETV4	5.46228	10.4008	37.8414	2.17e-139	6.36e-136	Up
ESM1	5.53403	6.53008	34.7127	3.54e-127	9.09e-124	Up
LGI1	-4.63546	1.15219	-34.3137	1.4e-125	3.19e-122	Down
BEST4	-6.84629	4.31568	-31.8963	9.93e-116	2.04e-112	Down
KRT24	-5.35162	0.915198	-31.662	9.3e-115	1.74e-111	Down
SLC17A8	-4.32814	1.05892	-31.5562	2.56e-114	4.38e-111	Down
VSTM2A	-5.46944	1.573	-31.4067	1.07e-113	1.69e-110	Down
UGP2	-1.99324	11.215	-31.0982	2.08e-112	3.04e-109	Down
FAM180B	-3.37228	0.852857	-30.8942	1.48e-111	2.03e-108	Down
DAO	-4.90301	1.22686	-30.1577	1.87e-108	2.4e-105	Down
KHDRBS2	-2.43303	0.536547	-29.8237	4.87e-107	5.88e-104	Down
TMEFF2	-3.48123	0.90007	-29.5127	1.02e-105	1.17e-102	Down
MTHFD1L	2.41702	9.60105	29.4873	1.31e-105	1.42e-102	Up
JUB	2.96885	8.57245	29.3938	3.29e-105	3.38e-102	Up
CMTM5	-3.5105	0.853546	-29.2282	1.68e-104	1.64e-101	Down
CA7	-7.68739	4.20108	-29.1282	4.49e-104	4.19e-101	Down
CHAT	-2.35852	0.435349	-28.9975	1.63e-103	1.46e-100	Down
RXRG	-4.10969	1.47719	-28.9108	3.84e-103	3.28e-100	Down
GRIK1	-2.66873	0.871956	-28.8626	6.18e-103	5e-100	Down
PCSK2	-5.57224	1.69666	-28.8601	6.34e-103	5e-100	Down
FAM135B	-4.65047	1.55075	-28.7306	2.28e-102	1.73e-99	Down
KIAA1199	5.40411	10.6539	28.5949	8.74e-102	6.41e-99	Up
FOXQ1	6.04685	8.98575	28.5796	1.02e-101	7.2e-99	Up
CLDN1	4.83017	10.3049	28.1901	4.88e-100	3.34e-97	Up
ELANE	-2.89015	0.891533	-28.1858	5.09e-100	3.37e-97	Down
GLP2R	-4.65001	2.0326	-28.0826	1.42e-99	9.13e-97	Down
P2RX2	-3.30923	0.953962	-27.9668	4.52e-99	2.81e-96	Down
LOC92659	2.85439	6.39033	27.8017	2.35e-98	1.42e-95	Up
RERGL	-5.2516	1.64937	-27.4877	5.45e-97	3.19e-94	Down
SGCG	-3.30792	0.973809	-27.4691	6.56e-97	3.74e-94	Down
GUCA2B	-8.58705	3.13422	-27.4365	9.1e-97	5.05e-94	Down
GLTP	-1.56111	9.75496	-26.882	2.41e-94	1.3e-91	Down
CLEC3B	-4.3281	6.73345	-26.7831	6.53e-94	3.44e-91	Down
MUSK	-3.70375	1.25764	-26.7608	8.18e-94	4.2e-91	Down
SLC25A34	-4.30387	4.48481	-26.6047	3.96e-93	1.98e-90	Down
NFE2L3	2.70131	11.1704	26.2425	1.55e-91	7.59e-89	Up
C6orf223	5.16381	8.47806	26.14	4.39e-91	2.1e-88	Up
PMP2	-3.88089	1.22679	-25.9542	2.9e-90	1.35e-87	Down
MMP27	-1.90319	0.359438	-25.8856	5.84e-90	2.66e-87	Down
LRP8	3.28184	7.9396	25.8694	6.88e-90	3.07e-87	Up
CDH10	-2.18222	0.488124	-25.723	3.06e-89	1.34e-86	Down
STMN4	-3.4637	1.05293	-25.637	7.35e-89	3.14e-86	Down
TEAD4	2.24293	8.78013	25.6105	9.62e-89	4.03e-86	Up
NPY2R	-4.03242	1.13009	-25.5421	1.93e-88	7.94e-86	Down
FIGF	-4.47033	2.04024	-25.4685	4.1e-88	1.65e-85	Down
GRIN2D	4.87502	8.58244	25.428	6.2e-88	2.45e-85	Up
SPTBN2	3.24132	9.11161	25.3865	9.48e-88	3.67e-85	Up
TRIB3	3.54592	10.0442	25.3569	1.28e-87	4.87e-85	Up
PDX1	4.65471	7.68944	25.1496	1.07e-86	3.99e-84	Up
XKR4	-3.12365	0.901721	-25.1315	1.29e-86	4.71e-84	Down
WNT2	5.24206	6.52014	25.1144	1.53e-86	5.52e-84	Up
PYY	-8.62371	2.88335	-25.1012	1.75e-86	6.21e-84	Down
FEV	-4.57457	1.46201	-25.0396	3.3e-86	1.15e-83	Down
LRRC8E	2.75622	7.7789	25.0294	3.66e-86	1.25e-83	Up
OSBPL3	1.95369	9.61651	24.8924	1.49e-85	5.02e-83	Up
SLCO4A1	3.28299	9.78674	24.6251	2.32e-84	7.67e-82	Up
SULT1A2	-4.26077	4.89494	-24.5551	4.76e-84	1.55e-81	Down
TMIGD1	-8.84136	3.0499	-24.4108	2.1e-83	6.73e-81	Down
FAM151A	-4.24435	2.3193	-24.4017	2.3e-83	7.28e-81	Down
SST	-6.2179	2.43836	-24.3339	4.63e-83	1.44e-80	Down
MYOT	-4.25388	1.64114	-24.1355	3.57e-82	1.1e-79	Down
NGB	-3.80036	0.983981	-24.097	5.32e-82	1.61e-79	Down
KIAA1737	-1.29239	9.39566	-23.972	1.93e-81	5.74e-79	Down
ENC1	1.99774	11.5538	23.8635	5.92e-81	1.74e-78	Up
AVPR1B	-1.71084	0.420108	-23.8052	1.08e-80	3.13e-78	Down
GSG1L	-2.38254	0.713406	-23.7741	1.49e-80	4.25e-78	Down
SLC30A10	-6.26824	2.39994	-23.7597	1.73e-80	4.86e-78	Down
CNGB1	-2.74977	0.965371	-23.7472	1.97e-80	5.46e-78	Down
ENPP6	-3.6438	2.38737	-23.7215	2.56e-80	7.02e-78	Down
ASPA	-4.03445	2.08757	-23.6138	7.81e-80	2.11e-77	Down
PRKG2	-4.27678	3.35256	-23.5431	1.62e-79	4.33e-77	Down
ANGPTL7	-4.76223	1.62834	-23.5094	2.3e-79	6.05e-77	Down
SCGN	-6.16651	2.90351	-23.4806	3.1e-79	7.95e-77	Down
ZNF575	-2.17669	5.76002	-23.4806	3.1e-79	7.95e-77	Down
TTC26	1.98682	6.45574	23.4763	3.24e-79	8.21e-77	Up
GTF2IRD1	2.17021	10.196	23.4439	4.53e-79	1.13e-76	Up
ANLN	2.23125	10.0251	23.3905	7.87e-79	1.95e-76	Up
TEX11	-3.97743	2.09187	-23.3634	1.04e-78	2.55e-76	Down
PRSS22	4.3184	7.73185	23.2958	2.1e-78	5.07e-76	Up
MAS1L	-1.59554	0.352348	-23.2734	2.65e-78	6.32e-76	Down
CADM2	-3.83728	1.15672	-23.2467	3.49e-78	8.23e-76	Down
CDKN2BAS	-6.58619	3.48687	-23.2194	4.63e-78	1.08e-75	Down
TMEM72	-5.03942	2.33973	-23.2071	5.26e-78	1.21e-75	Down
C2orf88	-4.23424	7.30345	-23.1693	7.79e-78	1.78e-75	Down
SPHKAP	-2.06997	0.505923	-23.1505	9.46e-78	2.13e-75	Down
ETFDH	-1.87797	8.61775	-23.1126	1.4e-77	3.13e-75	Down
SYT10	-2.53045	0.719161	-23.0814	1.94e-77	4.28e-75	Down
PEX26	-1.88781	9.26694	-23.0487	2.72e-77	5.93e-75	Down
PHLPP2	-2.38807	8.7352	-22.8726	1.69e-76	3.65e-74	Down
MS4A10	-3.69308	0.838785	-22.8555	2.02e-76	4.31e-74	Down
PLP1	-6.55899	3.11331	-22.8395	2.38e-76	5.04e-74	Down
PVT1	2.64259	6.74953	22.8341	2.52e-76	5.28e-74	Up
CMA1	-4.39135	1.35924	-22.7522	5.9e-76	1.22e-73	Down
MDFI	3.44129	7.45593	22.7117	8.98e-76	1.84e-73	Up
SLC7A5	2.96048	11.4575	22.6891	1.13e-75	2.31e-73	Up
AMPD1	-4.75017	2.07536	-22.6864	1.17e-75	2.35e-73	Down
APPL2	-1.70659	10.2605	-22.6829	1.21e-75	2.41e-73	Down
PLCD1	-2.33218	8.45003	-22.6352	1.99e-75	3.92e-73	Down
C2orf71	-0.955167	0.184855	-22.5851	3.34e-75	6.53e-73	Down
HPSE2	-3.69339	1.81301	-22.5693	3.94e-75	7.63e-73	Down
HIGD1A	-1.84226	11.2388	-22.4985	8.23e-75	1.58e-72	Down
ABCG2	-5.21323	5.46956	-22.4773	1.02e-74	1.95e-72	Down
PHOX2B	-4.30836	1.47833	-22.4549	1.29e-74	2.44e-72	Down
EPHX4	4.37619	6.37262	22.4458	1.42e-74	2.65e-72	Up
KIAA1549	2.40916	8.95945	22.3668	3.23e-74	5.98e-72	Up
GCG	-7.68317	2.77268	-22.3446	4.07e-74	7.47e-72	Down
ARPP21	-2.01456	0.541917	-22.3163	5.47e-74	9.93e-72	Down
SLC30A8	-2.11893	0.701739	-22.3147	5.56e-74	1e-71	Down
CLDN23	-3.26738	8.20125	-22.3006	6.44e-74	1.15e-71	Down
WDR75	1.17885	9.87532	22.2824	7.78e-74	1.38e-71	Up
PPAT	1.66979	8.95903	22.2462	1.13e-73	1.99e-71	Up
SPPL2A	-1.78587	9.41753	-22.2226	1.45e-73	2.52e-71	Down
RETSAT	-1.83858	11.2549	-22.1715	2.46e-73	4.25e-71	Down
C17orf96	3.37531	7.61301	22.1504	3.07e-73	5.25e-71	Up
CBFB	1.3415	10.2702	22.1441	3.28e-73	5.56e-71	Up
MIER3	-1.79175	9.65958	-22.0962	5.4e-73	9.08e-71	Down
CTNND2	-3.74726	1.72543	-22.0578	8.05e-73	1.34e-70	Down
DDX31	1.19782	8.43919	22.0493	8.8e-73	1.46e-70	Up
MYOC	-5.63898	1.91129	-22.0323	1.05e-72	1.72e-70	Down
SH2D7	-4.12174	2.15428	-22.0304	1.07e-72	1.74e-70	Down
PDCD4	-1.88619	11.2083	-22.0148	1.26e-72	2.03e-70	Down
TRIP13	2.19171	8.75622	22.0083	1.35e-72	2.16e-70	Up
TNFRSF12A	2.58514	9.77354	21.9802	1.81e-72	2.87e-70	Up
ADH1A	-4.25025	1.65936	-21.9499	2.47e-72	3.91e-70	Down
DNAJC2	1.45652	9.90965	21.9084	3.81e-72	5.97e-70	Up
GCNT2	-4.24024	5.05405	-21.8001	1.18e-71	1.83e-69	Down
BYSL	1.47019	9.21237	21.7797	1.46e-71	2.25e-69	Up
ANGPTL5	-2.07837	0.614911	-21.7495	2e-71	3.06e-69	Down
NOP58	1.41966	10.9129	21.7198	2.72e-71	4.13e-69	Up
ACADS	-2.42339	9.8889	-21.6598	5.08e-71	7.66e-69	Down
KCNIP4	-2.37386	4.27506	-21.6521	5.5e-71	8.25e-69	Down
ABCB11	-4.18565	1.62745	-21.612	8.36e-71	1.24e-68	Down
LRRC7	-2.90421	0.993324	-21.5776	1.2e-70	1.77e-68	Down
FUCA1	-1.8445	10.7896	-21.5356	1.85e-70	2.72e-68	Down
NRXN1	-5.35995	2.3834	-21.4758	3.45e-70	5.03e-68	Down
CBX8	1.70475	7.85272	21.4476	4.63e-70	6.7e-68	Up
CASR	-2.54343	0.903289	-21.42	6.18e-70	8.87e-68	Down
MAGEE2	-2.00733	0.688393	-21.401	7.53e-70	1.07e-67	Down
CA2	-5.96694	9.28845	-21.3508	1.27e-69	1.8e-67	Down
LOC572558	-3.94183	1.16701	-21.306	2.03e-69	2.85e-67	Down
SPATA12	2.6456	3.96867	21.3054	2.04e-69	2.85e-67	Up
RSPO2	-4.96335	2.82686	-21.2495	3.65e-69	5.04e-67	Down
NOP2	1.49583	10.2696	21.2493	3.66e-69	5.04e-67	Up
CPNE7	5.10302	7.44141	21.2486	3.69e-69	5.05e-67	Up
SMPDL3A	-2.81731	8.58253	-21.2458	3.8e-69	5.16e-67	Down
PKIB	-4.72416	7.08828	-21.2323	4.37e-69	5.91e-67	Down
TMEM206	1.5302	7.62272	21.2205	4.94e-69	6.63e-67	Up
SLC22A5	-1.84467	8.66135	-21.2027	5.95e-69	7.93e-67	Down
DKC1	1.54347	11.5181	21.1954	6.42e-69	8.51e-67	Up
PUS7	1.7385	9.26591	21.1873	6.98e-69	9.19e-67	Up
USP2	-4.21228	5.43647	-21.1167	1.46e-68	1.91e-66	Down
GPR119	-1.53161	0.337918	-21.084	2.05e-68	2.67e-66	Down
SPIB	-5.62045	4.72634	-21.0347	3.43e-68	4.43e-66	Down
DHRS11	-2.80082	9.19804	-21.0332	3.48e-68	4.47e-66	Down
RRP12	1.5136	10.1997	20.9848	5.77e-68	7.36e-66	Up
SLC39A10	1.79726	9.27321	20.9751	6.39e-68	8.1e-66	Up
PRR7	2.63767	6.29297	20.9647	7.12e-68	8.96e-66	Up
GFRA2	-4.27368	3.4805	-20.9466	8.6e-68	1.08e-65	Down
GALR1	-1.84157	0.496762	-20.9255	1.07e-67	1.33e-65	Down
HMGCLL1	-2.59771	1.41933	-20.9215	1.12e-67	1.38e-65	Down
KCTD4	-2.97471	1.31471	-20.9165	1.18e-67	1.45e-65	Down
ST8SIA3	-2.91696	0.914169	-20.8824	1.68e-67	2.05e-65	Down
PLEKHN1	3.51004	5.47169	20.8017	3.9e-67	4.73e-65	Up
GTPBP4	1.20873	10.4165	20.8012	3.92e-67	4.73e-65	Up
SLC17A7	-3.19988	2.49422	-20.7538	6.42e-67	7.71e-65	Down
PHOX2A	-3.03772	1.10635	-20.6901	1.25e-66	1.49e-64	Down
ENDOD1	-1.71874	10.1371	-20.6823	1.35e-66	1.61e-64	Down
KIAA0408	-5.25151	1.67237	-20.6763	1.44e-66	1.7e-64	Down
WDR43	1.27648	10.4882	20.6543	1.81e-66	2.13e-64	Up
CNTN2	-4.19683	2.03134	-20.6186	2.63e-66	3.07e-64	Down
MAB21L1	-3.23024	1.57835	-20.6062	2.99e-66	3.47e-64	Down
CA1	-10.4836	4.68483	-20.6018	3.13e-66	3.61e-64	Down
ROPN1	-2.64157	1.07674	-20.5913	3.49e-66	4.01e-64	Down
CNNM2	-1.66538	7.8606	-20.5411	5.9e-66	6.73e-64	Down
CCL23	-3.99662	1.93429	-20.5379	6.1e-66	6.92e-64	Down
CBX2	3.54454	7.72731	20.5321	6.48e-66	7.31e-64	Up
PKHD1L1	-4.0887	2.2944	-20.5004	9.02e-66	1.01e-63	Down
MGAT4C	-1.88302	0.502242	-20.4996	9.09e-66	1.01e-63	Down
HTR3E	-3.59072	1.22632	-20.498	9.25e-66	1.03e-63	Down
FUT1	2.51637	6.93758	20.4749	1.18e-65	1.3e-63	Up
PPM1H	2.16161	9.57374	20.4674	1.27e-65	1.4e-63	Up
PPAP2A	-2.06775	9.25119	-20.4184	2.12e-65	2.32e-63	Down
SLC6A6	2.94576	10.8601	20.3949	2.71e-65	2.94e-63	Up
RUVBL1	1.30969	10.3515	20.3864	2.96e-65	3.2e-63	Up
PYCR1	1.7385	11.2843	20.3712	3.47e-65	3.73e-63	Up
GNA11	-1.78924	9.72407	-20.3577	3.99e-65	4.27e-63	Down
C10orf2	1.52621	9.16407	20.3194	5.95e-65	6.33e-63	Up
HSP90AB1	1.16069	14.8849	20.2741	9.55e-65	1.01e-62	Up
LRRC3B	-1.98746	0.650286	-20.2625	1.08e-64	1.13e-62	Down
ADCYAP1R1	-2.43578	0.607589	-20.2539	1.18e-64	1.23e-62	Down
NEBL	2.28875	10.6476	20.2502	1.22e-64	1.27e-62	Up
MOBP	-2.52047	1.35033	-20.2499	1.23e-64	1.27e-62	Down
GYLTL1B	4.23863	8.5654	20.2491	1.24e-64	1.28e-62	Up
BAI3	-3.6319	1.79417	-20.247	1.27e-64	1.3e-62	Down
GRAMD3	-1.53954	8.76881	-20.2196	1.69e-64	1.72e-62	Down
TFAP4	1.45089	8.98225	20.1959	2.16e-64	2.19e-62	Up
CITED2	-1.89533	9.09309	-20.194	2.2e-64	2.23e-62	Down
GUCA2A	-7.03446	6.91821	-20.18	2.55e-64	2.56e-62	Down
ELAVL3	-2.71588	0.972226	-20.1259	4.48e-64	4.48e-62	Down
MAMDC2	-5.84517	3.8454	-20.1043	5.61e-64	5.59e-62	Down
PRDX6	-1.36781	12.0076	-20.1027	5.7e-64	5.65e-62	Down
MMP7	6.92338	8.2603	20.0869	6.72e-64	6.63e-62	Up
RBM28	1.36136	8.97956	20.0811	7.14e-64	7.01e-62	Up
C19orf28	1.43598	10.174	20.0481	1.01e-63	9.85e-62	Up
TPX2	2.01527	11.2533	20.0287	1.23e-63	1.2e-61	Up
SLC25A23	-1.69525	10.8507	-20.0044	1.59e-63	1.54e-61	Down
ECT2	1.82356	10.6736	19.9802	2.04e-63	1.97e-61	Up
MXI1	-1.58598	9.74615	-19.9648	2.4e-63	2.3e-61	Down
MAL	-4.14036	2.90366	-19.9644	2.41e-63	2.3e-61	Down
LYVE1	-4.85502	5.43596	-19.9328	3.35e-63	3.18e-61	Down
LOC284276	-1.98485	1.04819	-19.8933	5.06e-63	4.78e-61	Down
C2orf40	-4.83158	2.36555	-19.8875	5.37e-63	5.06e-61	Down
XRCC2	2.16843	6.50815	19.8839	5.58e-63	5.23e-61	Up
PABPC1L2B	-1.10408	0.2194	-19.8651	6.78e-63	6.33e-61	Down
S100A11	1.78754	12.7542	19.8567	7.41e-63	6.88e-61	Up
SLC6A19	-6.80035	3.08322	-19.8272	1.01e-62	9.31e-61	Down
PAQR4	1.78218	9.96323	19.8044	1.28e-62	1.18e-60	Up
AQP8	-9.06266	5.26306	-19.8009	1.32e-62	1.21e-60	Down
MACC1	2.45109	10.2087	19.7862	1.54e-62	1.41e-60	Up
DUSP21	-1.1387	0.173142	-19.7731	1.77e-62	1.61e-60	Down
SOX9	1.99483	12.0975	19.7441	2.39e-62	2.16e-60	Up
ACAN	3.81207	7.04278	19.7178	3.15e-62	2.83e-60	Up
BMP3	-6.57043	4.3585	-19.6854	4.41e-62	3.95e-60	Down
GNG3	-2.73563	2.47457	-19.6613	5.67e-62	5.06e-60	Down
CCNYL1	-1.35539	9.09027	-19.6573	5.91e-62	5.25e-60	Down
ASTN1	-3.54147	1.48449	-19.6379	7.23e-62	6.4e-60	Down
TAT	-3.3585	1.42813	-19.6167	9.02e-62	7.95e-60	Down
METTL1	1.37253	8.64845	19.573	1.42e-61	1.25e-59	Up
ZMYND19	1.3236	8.86794	19.5683	1.49e-61	1.3e-59	Up
CST1	6.8554	7.35003	19.5412	1.98e-61	1.72e-59	Up
QSOX2	1.34879	9.30814	19.5275	2.28e-61	1.98e-59	Up
ZBTB7B	-1.38995	10.746	-19.5179	2.52e-61	2.18e-59	Down
DDN	3.88054	5.29034	19.5117	2.69e-61	2.31e-59	Up
GPR12	-1.66086	0.409626	-19.467	4.28e-61	3.67e-59	Down
KIF14	2.12036	7.70753	19.4545	4.88e-61	4.16e-59	Up
DMRTA1	-3.7828	1.95896	-19.4431	5.5e-61	4.66e-59	Down
TEX10	1.15177	9.17633	19.4285	6.4e-61	5.41e-59	Up
C20orf20	1.57288	9.48123	19.4252	6.62e-61	5.55e-59	Up
XPO5	1.28379	10.5281	19.4252	6.62e-61	5.55e-59	Up
POLR1B	1.17409	9.6774	19.4184	7.1e-61	5.93e-59	Up
CLEC9A	-2.89818	1.53709	-19.4144	7.41e-61	6.16e-59	Down
DPP6	-4.74171	2.24383	-19.3838	1.02e-60	8.43e-59	Down
NAAA	-2.21312	9.17106	-19.367	1.21e-60	1e-58	Down
ABCA8	-6.29287	4.07157	-19.3424	1.57e-60	1.29e-58	Down
TP53INP2	-2.62647	9.86803	-19.3417	1.58e-60	1.29e-58	Down
MKI67IP	1.13235	10.105	19.3383	1.64e-60	1.33e-58	Up
NRG2	-2.7597	1.25346	-19.3277	1.83e-60	1.48e-58	Down
MET	1.80255	11.5602	19.3152	2.08e-60	1.68e-58	Up
PALB2	1.00655	8.57736	19.3099	2.2e-60	1.77e-58	Up
CCT6A	1.16872	12.4475	19.3043	2.33e-60	1.87e-58	Up
PIRT	-4.56485	2.53996	-19.2802	2.99e-60	2.39e-58	Down
SET	0.929346	12.8198	19.2788	3.04e-60	2.42e-58	Up
VWA2	3.97675	8.10817	19.2569	3.82e-60	3.02e-58	Up
ZER1	-1.2033	10.206	-19.2557	3.86e-60	3.05e-58	Down
SCARA5	-6.19907	5.26048	-19.2232	5.41e-60	4.26e-58	Down
INHBA	4.7092	6.69973	19.1981	7.03e-60	5.51e-58	Up
CLDN8	-7.49734	2.81995	-19.193	7.41e-60	5.78e-58	Down
TMEM100	-4.30821	3.92447	-19.1668	9.73e-60	7.57e-58	Down
CCDC86	1.37911	9.83561	19.1428	1.25e-59	9.67e-58	Up
KAT2A	1.48411	10.6397	19.1384	1.31e-59	1.01e-57	Up
FOXD3	-3.09046	1.31551	-19.1286	1.45e-59	1.11e-57	Down
MT1M	-5.82398	4.97647	-19.1149	1.67e-59	1.28e-57	Down
KIAA2022	-3.82301	2.30809	-19.0696	2.67e-59	2.04e-57	Down
PRIMA1	-5.54625	3.48928	-19.0633	2.86e-59	2.17e-57	Down
GBA3	-5.42577	3.30091	-19.0527	3.19e-59	2.42e-57	Down
PI16	-5.85774	3.57427	-19.0062	5.17e-59	3.9e-57	Down
SLC25A20	-1.64824	8.69404	-18.9973	5.67e-59	4.26e-57	Down
OLFM3	-2.97328	1.12597	-18.9905	6.08e-59	4.56e-57	Down
CGREF1	3.46017	8.52192	18.98	6.79e-59	5.07e-57	Up
NCRNA00092	-2.62356	1.98482	-18.9745	7.18e-59	5.34e-57	Down
HS3ST6	-2.87574	0.825261	-18.9711	7.44e-59	5.52e-57	Down
COL11A1	6.37577	7.79642	18.9629	8.1e-59	5.99e-57	Up
SCN11A	-3.32465	2.04058	-18.9401	1.03e-58	7.55e-57	Down
SPOCK3	-3.29577	1.10438	-18.9299	1.14e-58	8.37e-57	Down
KRTAP13-2	-3.96994	1.01679	-18.9239	1.21e-58	8.88e-57	Down
SLC27A6	-2.95524	1.45076	-18.9188	1.28e-58	9.33e-57	Down
PLD5	-1.7882	0.448844	-18.915	1.33e-58	9.67e-57	Down
CBX3	1.28019	12.2025	18.9134	1.35e-58	9.79e-57	Up
SLC7A14	-3.92675	1.59658	-18.9058	1.47e-58	1.06e-56	Down
GARS	1.24594	11.6732	18.894	1.66e-58	1.19e-56	Up
GNL3	1.22338	11.1269	18.876	2e-58	1.43e-56	Up
CEP72	2.04308	7.23439	18.8631	2.28e-58	1.63e-56	Up
ELAVL4	-3.25148	1.75521	-18.7836	5.21e-58	3.7e-56	Down
NOB1	1.1291	10.8683	18.7808	5.37e-58	3.8e-56	Up
CADM3	-5.90133	4.12593	-18.7649	6.33e-58	4.47e-56	Down
FAM5C	-5.54485	2.46256	-18.7635	6.42e-58	4.52e-56	Down
FAM107A	-3.73477	5.78399	-18.7605	6.63e-58	4.64e-56	Down
ETHE1	-1.92534	11.1953	-18.7523	7.21e-58	5.04e-56	Down
SCN7A	-5.69512	3.04724	-18.745	7.78e-58	5.42e-56	Down
MIER1	-1.25031	9.86364	-18.7438	7.88e-58	5.47e-56	Down
NAP1L2	-3.88756	3.06423	-18.7355	8.59e-58	5.94e-56	Down
UGDH	-1.79833	10.5152	-18.729	9.19e-58	6.33e-56	Down
HSD3B2	-5.24896	2.06476	-18.7082	1.14e-57	7.83e-56	Down
FRMPD4	-2.80243	0.850533	-18.7067	1.16e-57	7.93e-56	Down
C1orf135	2.16794	6.47771	18.704	1.19e-57	8.12e-56	Up
RNF152	-3.07946	4.0709	-18.6997	1.25e-57	8.47e-56	Down
HJURP	1.76503	8.82769	18.696	1.29e-57	8.77e-56	Up
TDP2	-1.89459	10.9322	-18.6777	1.56e-57	1.06e-55	Down
ADHFE1	-3.37285	2.94578	-18.677	1.58e-57	1.06e-55	Down
SALL4	4.11916	5.11536	18.6403	2.31e-57	1.55e-55	Up
C7orf68	2.19784	8.91929	18.6325	2.5e-57	1.67e-55	Up
SKA3	2.11123	8.75844	18.6294	2.58e-57	1.72e-55	Up
SPINK2	-3.29747	1.6269	-18.602	3.43e-57	2.28e-55	Down
HMP19	-4.57643	2.56763	-18.5957	3.66e-57	2.43e-55	Down
FBLIM1	-1.23752	10.8372	-18.5819	4.22e-57	2.79e-55	Down
CD3EAP	1.36755	9.02306	18.576	4.49e-57	2.96e-55	Up
IL6R	-3.17164	7.06659	-18.5708	4.74e-57	3.11e-55	Down
TPH1	-4.02818	1.95154	-18.5701	4.78e-57	3.12e-55	Down
BRIX1	1.26636	9.76171	18.565	5.03e-57	3.27e-55	Up
DHDDS	-1.28503	9.52322	-18.565	5.04e-57	3.27e-55	Down
FAM82A1	-1.99365	6.66303	-18.5647	5.05e-57	3.27e-55	Down
GABRD	2.53872	4.2051	18.5578	5.42e-57	3.5e-55	Up
SIM2	3.73047	7.26248	18.5562	5.52e-57	3.55e-55	Up
DDX10	1.16022	9.42973	18.5223	7.84e-57	5.03e-55	Up
ENTPD5	-2.59276	8.71555	-18.5195	8.07e-57	5.16e-55	Down
ORC6L	2.01967	7.97949	18.5177	8.22e-57	5.24e-55	Up
URB2	1.23776	8.89419	18.511	8.81e-57	5.6e-55	Up
ALPI	-5.34824	4.56875	-18.4958	1.03e-56	6.53e-55	Down
KLF4	-2.87524	10.4718	-18.4932	1.06e-56	6.7e-55	Down
NKRF	1.39828	8.80155	18.4774	1.25e-56	7.86e-55	Up
ATP11A	2.06477	10.4894	18.4678	1.38e-56	8.65e-55	Up
RASGEF1C	-2.84779	1.14697	-18.4664	1.4e-56	8.75e-55	Down
CSE1L	1.53032	11.7283	18.4586	1.52e-56	9.46e-55	Up
HADHA	-0.881678	12.3878	-18.4521	1.62e-56	1.01e-54	Down
CDC25B	2.07617	11.3016	18.449	1.68e-56	1.04e-54	Up
MT1F	-3.45186	7.00167	-18.4401	1.84e-56	1.14e-54	Down
CD177	-7.52497	6.17409	-18.413	2.43e-56	1.5e-54	Down
CDKN2B	-3.31587	8.36824	-18.4066	2.6e-56	1.6e-54	Down
SLC5A7	-3.46369	1.31542	-18.4037	2.68e-56	1.64e-54	Down
ERVFRDE1	-2.21328	1.05317	-18.4002	2.78e-56	1.7e-54	Down
RHPN1	2.83357	7.93758	18.3965	2.88e-56	1.76e-54	Up
SSB	1.11486	11.3053	18.3945	2.94e-56	1.79e-54	Up
SOX10	-4.84403	2.71517	-18.3912	3.05e-56	1.85e-54	Down
PLAC9	-3.98671	3.85532	-18.3842	3.28e-56	1.98e-54	Down
DDX56	1.06235	10.792	18.3624	4.11e-56	2.47e-54	Up
CAD	1.40933	10.8318	18.346	4.87e-56	2.92e-54	Up
AHCYL2	-2.90049	10.7332	-18.3078	7.23e-56	4.32e-54	Down
SLC36A1	-1.79988	9.10651	-18.3033	7.58e-56	4.52e-54	Down
STIM1	-1.07613	10.1168	-18.2845	9.2e-56	5.48e-54	Down
HPGDS	-3.69329	3.49035	-18.2754	1.01e-55	5.99e-54	Down
FGFBP2	-3.01746	2.07316	-18.2753	1.01e-55	5.99e-54	Down
GABRG1	-1.27023	0.268005	-18.2747	1.02e-55	6e-54	Down
TMEM132A	2.28377	9.18261	18.2723	1.04e-55	6.14e-54	Up
RAD54B	1.99865	7.19778	18.2695	1.08e-55	6.31e-54	Up
TMEM41A	1.06975	9.64618	18.2653	1.12e-55	6.56e-54	Up
TOMM34	1.78249	10.7792	18.2614	1.17e-55	6.81e-54	Up
C5orf34	1.70847	5.98074	18.2403	1.45e-55	8.46e-54	Up
RALYL	-1.70745	0.430105	-18.2299	1.62e-55	9.39e-54	Down
C16orf89	-4.73887	3.35203	-18.2233	1.73e-55	1e-53	Down
NCOA4	-1.06728	11.8464	-18.196	2.3e-55	1.33e-53	Down
PXMP2	-1.72344	8.51713	-18.1886	2.48e-55	1.43e-53	Down
LYAR	1.49654	9.24789	18.1841	2.6e-55	1.49e-53	Up
PDCD2L	1.40211	7.95656	18.1767	2.81e-55	1.6e-53	Up
RIPK2	1.41904	8.90929	18.1627	3.24e-55	1.85e-53	Up
RAP1A	-1.12906	10.2288	-18.1554	3.5e-55	1.99e-53	Down
KIAA1257	3.17013	5.82118	18.1521	3.62e-55	2.05e-53	Up
PCDH11X	-1.9912	0.647857	-18.152	3.62e-55	2.05e-53	Down
CCND1	1.63989	12.086	18.1383	4.17e-55	2.35e-53	Up
CNTFR	-5.61679	3.09164	-18.1308	4.51e-55	2.54e-53	Down
MPZ	-3.06448	4.42565	-18.1175	5.17e-55	2.9e-53	Down
PPRC1	1.13587	10.3125	18.0948	6.54e-55	3.66e-53	Up
TEF	-1.76279	8.61565	-18.0937	6.62e-55	3.69e-53	Down
CD160	-2.4083	3.09048	-18.083	7.39e-55	4.11e-53	Down
CALM1	-0.913055	13.1329	-18.0618	9.2e-55	5.11e-53	Down
SLC2A13	-1.81522	8.09638	-18.0509	1.03e-54	5.7e-53	Down
ASB8	-0.752157	9.077	-18.0417	1.13e-54	6.25e-53	Down
CPT2	-1.36267	9.88428	-18.0374	1.18e-54	6.52e-53	Down
ATP6V0D1	-1.13385	11.0996	-18.0075	1.61e-54	8.85e-53	Down
THUMPD2	1.04476	7.71992	18.007	1.62e-54	8.88e-53	Up
CBLN2	-3.34524	2.56125	-17.9875	1.98e-54	1.08e-52	Down
LIFR	-3.73833	5.84438	-17.9751	2.25e-54	1.23e-52	Down
ZNF536	-3.64456	2.37276	-17.9737	2.29e-54	1.24e-52	Down
SEMA3E	-4.73285	2.38961	-17.9708	2.36e-54	1.28e-52	Down
AP3S2	-1.06625	10.3712	-17.9696	2.39e-54	1.29e-52	Down
SLC16A12	-2.31492	1.51788	-17.9691	2.4e-54	1.29e-52	Down
NOL6	1.08019	10.4987	17.9647	2.51e-54	1.35e-52	Up
IQGAP3	2.01213	10.0845	17.9626	2.57e-54	1.37e-52	Up
C4orf34	-1.93269	8.89058	-17.9605	2.62e-54	1.4e-52	Down
SOX4	1.75479	11.43	17.9481	2.98e-54	1.59e-52	Up
TTLL4	1.16308	9.33283	17.94	3.24e-54	1.72e-52	Up
SLC26A2	-4.7125	10.6726	-17.9245	3.8e-54	2.02e-52	Down
PUS1	1.35752	9.48015	17.9219	3.9e-54	2.06e-52	Up
DDX55	1.15299	8.96505	17.919	4.02e-54	2.12e-52	Up
SCN9A	-4.24413	4.72351	-17.8989	4.95e-54	2.6e-52	Down
AMPD2	1.06175	10.0799	17.8931	5.25e-54	2.76e-52	Up
PDE6A	-4.51448	3.39066	-17.8853	5.69e-54	2.98e-52	Down
LOC728606	-2.73936	0.951996	-17.8835	5.8e-54	3.03e-52	Down
UNC5D	-2.55734	1.22044	-17.8789	6.08e-54	3.17e-52	Down
MYT1L	-1.96486	0.574454	-17.8662	6.94e-54	3.6e-52	Down
NPY6R	-4.51648	2.01336	-17.8598	7.41e-54	3.84e-52	Down
CBX4	1.5153	9.4313	17.8564	7.67e-54	3.97e-52	Up
UBE2C	2.05869	10.4006	17.8552	7.77e-54	4.01e-52	Up
PPM1A	-0.978671	10.2498	-17.8545	7.82e-54	4.02e-52	Down
NAT10	1.14137	10.8604	17.834	9.67e-54	4.96e-52	Up
AQPEP	-2.85751	1.69826	-17.7977	1.41e-53	7.2e-52	Down
SMOX	2.12517	8.57761	17.794	1.46e-53	7.45e-52	Up
ANKRD13B	2.2508	7.82371	17.7884	1.55e-53	7.88e-52	Up
ANKS1B	-2.91639	1.61222	-17.7875	1.56e-53	7.93e-52	Down
NLGN1	-3.49501	1.56675	-17.785	1.6e-53	8.12e-52	Down
GABRG2	-2.8591	0.982867	-17.7762	1.75e-53	8.87e-52	Down
ZSWIM4	1.56556	8.30396	17.7641	1.99e-53	1e-51	Up
MS4A12	-8.34812	4.9634	-17.7541	2.2e-53	1.11e-51	Down
GNA13	-1.02749	10.7249	-17.7491	2.32e-53	1.16e-51	Down
AGPAT9	-2.8584	7.11111	-17.7355	2.67e-53	1.34e-51	Down
C9orf140	1.96466	10.5753	17.7316	2.78e-53	1.38e-51	Up
STBD1	-1.75562	8.97266	-17.7316	2.78e-53	1.38e-51	Down
METTL7A	-2.68012	9.80467	-17.723	3.03e-53	1.51e-51	Down
C3orf26	1.48354	8.85527	17.719	3.16e-53	1.57e-51	Up
MTBP	1.91338	6.93407	17.7165	3.24e-53	1.61e-51	Up
NAA25	0.999105	9.29903	17.7129	3.37e-53	1.66e-51	Up
GPD1L	-1.50071	10.2497	-17.7054	3.64e-53	1.79e-51	Down
NUF2	1.83945	8.24561	17.7036	3.71e-53	1.82e-51	Up
CHP	-1.44744	11.644	-17.6993	3.87e-53	1.9e-51	Down
CDH19	-4.39918	2.12712	-17.6977	3.94e-53	1.93e-51	Down
XPOT	1.34308	10.8767	17.6793	4.76e-53	2.32e-51	Up
CRHBP	-2.42568	1.42306	-17.6624	5.67e-53	2.76e-51	Down
UTP14A	1.4996	9.81922	17.658	5.93e-53	2.88e-51	Up
BEX1	-3.53697	2.11484	-17.6344	7.56e-53	3.66e-51	Down
CNR1	-4.46801	3.23091	-17.6331	7.66e-53	3.7e-51	Down
PINK1	-1.49449	10.3354	-17.632	7.75e-53	3.74e-51	Down
DSCC1	1.86713	7.9723	17.6269	8.17e-53	3.93e-51	Up
ZZEF1	-1.67106	10.4875	-17.6168	9.06e-53	4.35e-51	Down
CSNK1E	0.951287	10.9344	17.5892	1.2e-52	5.76e-51	Up
ATCAY	-3.22567	1.57791	-17.5805	1.32e-52	6.29e-51	Down
CPEB1	-3.37455	1.84773	-17.5742	1.41e-52	6.69e-51	Down
B3GALT1	-4.29225	2.57713	-17.5725	1.43e-52	6.79e-51	Down
SLC4A10	-4.10116	2.45488	-17.5716	1.44e-52	6.84e-51	Down
ATAD2	1.66105	9.97003	17.5607	1.61e-52	7.64e-51	Up
TROAP	1.96336	8.65443	17.5564	1.69e-52	7.97e-51	Up
CASP7	-1.64887	10.4715	-17.5545	1.72e-52	8.1e-51	Down
SYT9	-1.86483	0.689165	-17.5533	1.74e-52	8.18e-51	Down
MPND	-1.1626	9.17997	-17.5512	1.78e-52	8.35e-51	Down
CDKL1	-2.16613	4.61853	-17.5468	1.86e-52	8.71e-51	Down
RTKN	1.16813	10.3961	17.545	1.9e-52	8.86e-51	Up
FXYD1	-4.53179	3.43374	-17.5423	1.95e-52	9.08e-51	Down
SLC4A4	-6.29159	6.90823	-17.5187	2.49e-52	1.15e-50	Down
NOC3L	1.16718	8.66563	17.5155	2.57e-52	1.19e-50	Up
TAF1D	1.33318	9.71167	17.5095	2.73e-52	1.26e-50	Up
NR3C2	-3.10704	8.5737	-17.5094	2.74e-52	1.26e-50	Down
HSPD1	1.40049	13.7987	17.5056	2.84e-52	1.31e-50	Up
KIF18B	1.83965	8.53533	17.503	2.92e-52	1.34e-50	Up
NKD2	3.88351	7.58429	17.4832	3.58e-52	1.64e-50	Up
BRCA2	1.98658	7.70273	17.4747	3.91e-52	1.79e-50	Up
CAV3	-1.25168	0.303719	-17.4449	5.31e-52	2.42e-50	Down
SULT2B1	3.29112	8.14538	17.4385	5.67e-52	2.58e-50	Up
CA4	-8.353	5.32713	-17.4224	6.69e-52	3.04e-50	Down
KCNE2	-2.20627	1.82937	-17.4172	7.06e-52	3.2e-50	Down
ABHD3	-1.95818	9.43709	-17.4033	8.15e-52	3.68e-50	Down
CYBASC3	-0.942284	10.0998	-17.3915	9.19e-52	4.15e-50	Down
UNC5C	-3.39871	3.3674	-17.3664	1.19e-51	5.35e-50	Down
CCNO	2.87849	6.65183	17.3656	1.2e-51	5.39e-50	Up
ATP6V1G2	-2.38245	2.84891	-17.3642	1.22e-51	5.45e-50	Down
C1orf177	-2.33677	1.53928	-17.3603	1.27e-51	5.67e-50	Down
RILP	-1.84878	7.53261	-17.3472	1.45e-51	6.46e-50	Down
IGSF11	-2.9217	1.53465	-17.336	1.63e-51	7.24e-50	Down
TRAK2	-1.03638	10.0787	-17.3358	1.63e-51	7.24e-50	Down
GRHL3	4.08777	5.3838	17.3345	1.65e-51	7.32e-50	Up
C14orf176	-3.01137	6.61197	-17.334	1.66e-51	7.34e-50	Down
TNFRSF13B	-3.85006	2.52512	-17.33	1.73e-51	7.63e-50	Down
TMEM220	-3.27972	5.44617	-17.3269	1.78e-51	7.86e-50	Down
P2RY4	-2.5472	1.2738	-17.3264	1.79e-51	7.89e-50	Down
GMPS	0.951529	10.2769	17.3244	1.83e-51	8.03e-50	Up
CFD	-3.97057	7.70281	-17.3237	1.84e-51	8.07e-50	Down
ABCE1	1.0588	10.8934	17.3089	2.15e-51	9.38e-50	Up
DUSP14	1.59431	7.87058	17.3029	2.28e-51	9.95e-50	Up
C11orf82	1.93151	7.39464	17.3026	2.29e-51	9.96e-50	Up
SLC22A18AS	-2.61715	6.89835	-17.2956	2.46e-51	1.07e-49	Down
PRPH	-4.95311	3.63383	-17.2935	2.52e-51	1.09e-49	Down
GNG7	-3.05746	5.57227	-17.2921	2.55e-51	1.1e-49	Down
APLN	3.05804	6.95055	17.2842	2.77e-51	1.19e-49	Up
PDK4	-3.3252	8.5598	-17.2744	3.06e-51	1.32e-49	Down
WISP2	-5.12105	3.13139	-17.2715	3.15e-51	1.35e-49	Down
ATP1A2	-5.60083	4.06177	-17.2631	3.44e-51	1.47e-49	Down
PPP2R3A	-2.19102	7.2833	-17.2489	3.97e-51	1.7e-49	Down
NEFM	-3.31819	2.14399	-17.2481	4.01e-51	1.71e-49	Down
PTPN21	-1.50132	8.38708	-17.246	4.1e-51	1.74e-49	Down
COL19A1	-2.61061	1.35811	-17.2359	4.54e-51	1.93e-49	Down
CNN2	1.23561	12.0131	17.2358	4.55e-51	1.93e-49	Up
RIMS4	-3.67944	2.3045	-17.2299	4.83e-51	2.04e-49	Down
HADHB	-0.98504	11.1372	-17.2284	4.9e-51	2.07e-49	Down
GPR44	-3.19479	4.52773	-17.2243	5.11e-51	2.16e-49	Down
UHRF1	1.93182	8.6855	17.2081	6.04e-51	2.54e-49	Up
SMYD5	1.06936	9.60911	17.2067	6.13e-51	2.57e-49	Up
PLEKHA9	1.41418	6.05709	17.2051	6.23e-51	2.61e-49	Up
DCUN1D5	1.26994	8.85417	17.2012	6.48e-51	2.71e-49	Up
GRIK3	-3.66356	3.74231	-17.1818	7.91e-51	3.3e-49	Down
PLAC2	-3.66873	3.74155	-17.1811	7.97e-51	3.32e-49	Down
TMEM37	-3.18554	7.93983	-17.1791	8.13e-51	3.38e-49	Down
RRP9	1.29698	9.60033	17.1707	8.86e-51	3.67e-49	Up
GSTM5	-3.48001	4.30748	-17.1664	9.26e-51	3.83e-49	Down
CDC14A	-1.92933	7.08044	-17.1658	9.32e-51	3.85e-49	Down
RIOK3	-1.48378	10.6479	-17.1636	9.53e-51	3.93e-49	Down
FAM89A	1.69815	7.47811	17.1537	1.05e-50	4.34e-49	Up
P2RX4	-1.51153	9.42023	-17.1458	1.14e-50	4.7e-49	Down
INSL5	-5.6338	1.89715	-17.1251	1.41e-50	5.79e-49	Down
PLXNA1	1.31767	10.5972	17.1248	1.42e-50	5.8e-49	Up
CCR10	-2.59011	3.10637	-17.1214	1.47e-50	5.99e-49	Down
MORC2	0.948453	9.85125	17.1168	1.54e-50	6.27e-49	Up
C6orf72	-1.05348	8.67346	-17.1156	1.56e-50	6.34e-49	Down
GPR15	-4.74176	2.90544	-17.1073	1.7e-50	6.88e-49	Down
CHGA	-7.84475	5.40303	-17.1005	1.82e-50	7.36e-49	Down
RDH5	-2.54418	6.65521	-17.0943	1.94e-50	7.83e-49	Down
SMPD1	-1.86138	9.17098	-17.0782	2.28e-50	9.22e-49	Down
PLCE1	-2.30568	8.85465	-17.0706	2.47e-50	9.95e-49	Down
SFRP1	-5.69213	4.97984	-17.0489	3.08e-50	1.24e-48	Down
DIAPH3	1.80916	8.27183	17.0401	3.38e-50	1.35e-48	Up
CIRH1A	1.0642	10.1508	17.0361	3.52e-50	1.41e-48	Up
MT1H	-4.95628	4.8015	-17.0287	3.79e-50	1.51e-48	Down
C7orf40	1.68472	8.81311	17.0282	3.81e-50	1.52e-48	Up
SF3B3	0.922649	12.138	17.0269	3.87e-50	1.54e-48	Up
CLCA4	-8.90994	5.94705	-17.0184	4.22e-50	1.67e-48	Down
SEC14L2	2.27645	7.1889	17.0182	4.22e-50	1.67e-48	Up
ATP2B3	-2.25401	0.761715	-17.0167	4.29e-50	1.7e-48	Down
CHAD	-3.55704	3.7643	-17.0078	4.7e-50	1.85e-48	Down
MUSTN1	-2.91389	3.83821	-17.0076	4.71e-50	1.86e-48	Down
TMEM82	-4.24255	4.4679	-17.0028	4.94e-50	1.94e-48	Down
NOLC1	1.17824	11.777	16.9989	5.14e-50	2.02e-48	Up
SQRDL	-1.72983	11.4564	-16.9953	5.34e-50	2.09e-48	Down
RFC3	1.75504	9.36795	16.9748	6.59e-50	2.58e-48	Up
CALY	-3.00101	1.16693	-16.9735	6.67e-50	2.6e-48	Down
CKAP2	1.51204	10.0635	16.973	6.71e-50	2.61e-48	Up
VIT	-3.47962	1.88224	-16.9677	7.08e-50	2.75e-48	Down
PRPF4	0.833426	9.82852	16.96	7.66e-50	2.97e-48	Up
ABCC13	-4.10327	3.42449	-16.9523	8.29e-50	3.21e-48	Down
ACO2	-1.13049	11.8792	-16.9495	8.53e-50	3.3e-48	Down
MEP1B	-4.82228	2.90098	-16.9479	8.67e-50	3.35e-48	Down
LRRC1	-1.11076	9.75446	-16.9442	9.01e-50	3.47e-48	Down
BCHE	-4.69288	3.66359	-16.9432	9.1e-50	3.5e-48	Down
HSD11B2	-2.64591	11.1141	-16.9397	9.43e-50	3.62e-48	Down
FJX1	2.45541	5.98338	16.9287	1.06e-49	4.04e-48	Up
S100A2	3.77065	6.25131	16.9254	1.09e-49	4.17e-48	Up
C1orf170	2.69206	4.3566	16.922	1.13e-49	4.31e-48	Up
C11orf84	1.42092	8.82217	16.8983	1.44e-49	5.48e-48	Up
C1orf186	-3.11178	2.09355	-16.896	1.47e-49	5.6e-48	Down
P2RY14	-2.98908	5.29024	-16.8906	1.56e-49	5.91e-48	Down
NAALADL1	-3.19219	5.97116	-16.8718	1.89e-49	7.15e-48	Down
PYGM	-3.99076	3.67597	-16.8708	1.91e-49	7.21e-48	Down
KIAA0020	1.22913	9.89956	16.868	1.96e-49	7.4e-48	Up
TAGLN3	-3.6246	1.83588	-16.8656	2.01e-49	7.57e-48	Down
MRPL17	1.14004	10.157	16.8582	2.17e-49	8.16e-48	Up
TAF1A	1.43526	6.6294	16.8528	2.29e-49	8.6e-48	Up
OTX1	3.86043	3.98837	16.8521	2.31e-49	8.64e-48	Up
GPT	-4.14091	6.83242	-16.8449	2.48e-49	9.29e-48	Down
SLCO4C1	-3.91448	2.73772	-16.8438	2.51e-49	9.37e-48	Down
ACTR3B	1.25993	7.74901	16.8427	2.54e-49	9.46e-48	Up
HTR7	-2.69966	2.27527	-16.8418	2.56e-49	9.54e-48	Down
UGT1A8	-5.37989	4.72698	-16.8363	2.71e-49	1.01e-47	Down
TGFBI	2.88112	13.5497	16.8355	2.73e-49	1.01e-47	Up
CHST9	-3.01384	0.982064	-16.8266	2.99e-49	1.11e-47	Down
SORCS1	-4.34752	2.95529	-16.8264	3e-49	1.11e-47	Down
TESK2	-1.49766	7.15246	-16.8174	3.29e-49	1.21e-47	Down
ATIC	1.03389	11.4237	16.8105	3.53e-49	1.3e-47	Up
CDK2	1.02479	9.66546	16.8074	3.64e-49	1.34e-47	Up
ODF2	0.949656	9.90019	16.7889	4.4e-49	1.61e-47	Up
STX12	-1.00301	9.96469	-16.7889	4.4e-49	1.61e-47	Down
ST6GALNAC6	-2.80719	9.5354	-16.7887	4.41e-49	1.61e-47	Down
IMPDH1	1.48304	10.6751	16.7805	4.79e-49	1.75e-47	Up
RSL1D1	1.03171	12.126	16.776	5.02e-49	1.83e-47	Up
DCAF12L1	-0.627205	0.118421	-16.7734	5.15e-49	1.87e-47	Down
OGFOD1	0.712425	9.7598	16.7668	5.51e-49	2e-47	Up
CNNM4	-1.5555	10.7554	-16.7412	7.16e-49	2.59e-47	Down
SUCLG2	-1.24502	11.2333	-16.7334	7.75e-49	2.8e-47	Down
ACOX1	-1.41546	11.0271	-16.7328	7.8e-49	2.81e-47	Down
ANK3	-1.66454	8.93827	-16.7246	8.47e-49	3.05e-47	Down
FTSJ1	1.0539	9.71843	16.7243	8.5e-49	3.06e-47	Up
NCAPG2	1.34838	9.62721	16.7141	9.43e-49	3.39e-47	Up
EIF4E3	-2.12011	8.65643	-16.7102	9.82e-49	3.52e-47	Down
ABHD5	-1.12761	8.76361	-16.7093	9.91e-49	3.54e-47	Down
RHBDF2	1.5489	9.67749	16.703	1.06e-48	3.77e-47	Up
MMP11	3.78522	10.6309	16.7011	1.08e-48	3.84e-47	Up
RPH3A	-2.10626	1.1095	-16.6995	1.09e-48	3.89e-47	Down
LGALS4	-2.1292	14.2395	-16.6801	1.33e-48	4.74e-47	Down
ITM2C	-2.6605	13.1269	-16.6581	1.67e-48	5.92e-47	Down
OSTBETA	-4.78989	5.46085	-16.6518	1.78e-48	6.3e-47	Down
CCT3	0.947785	12.8299	16.6498	1.82e-48	6.42e-47	Up
TMCC3	-2.41764	8.92456	-16.6476	1.86e-48	6.55e-47	Down
SNORD1C	2.11845	4.63114	16.6465	1.88e-48	6.62e-47	Up
TNXB	-4.30374	7.71357	-16.6401	2.01e-48	7.05e-47	Down
TCOF1	1.31441	10.9203	16.6339	2.14e-48	7.49e-47	Up
SLC7A11	2.52831	8.51385	16.6287	2.25e-48	7.89e-47	Up
EIF3B	1.099	12.5662	16.6258	2.32e-48	8.11e-47	Up
WDR12	1.12902	9.46196	16.6143	2.61e-48	9.11e-47	Up
CDK4	1.21279	11.633	16.6118	2.68e-48	9.32e-47	Up
ZG16	-8.89838	6.40603	-16.5982	3.07e-48	1.07e-46	Down
ZC3H8	1.25823	7.60869	16.5915	3.29e-48	1.14e-46	Up
TMEM127	-0.879856	11.0483	-16.5679	4.18e-48	1.45e-46	Down
E2F1	1.70687	9.0478	16.5676	4.19e-48	1.45e-46	Up
C1orf210	-1.63953	8.88848	-16.5587	4.59e-48	1.59e-46	Down
C10orf54	-1.81659	9.50767	-16.5574	4.66e-48	1.61e-46	Down
ANKRD13A	-0.951511	9.78603	-16.555	4.77e-48	1.64e-46	Down
TRIM29	3.93786	9.73407	16.5538	4.83e-48	1.66e-46	Up
ARMC10	1.08179	9.87395	16.5513	4.96e-48	1.7e-46	Up
NPY	-3.16375	1.25577	-16.5325	6e-48	2.06e-46	Down
NDRG2	-1.67219	10.4041	-16.518	6.95e-48	2.38e-46	Down
NBEAL1	-2.09498	6.66638	-16.5158	7.11e-48	2.43e-46	Down
EGLN1	-0.961602	10.1476	-16.504	8.01e-48	2.73e-46	Down
PKNOX2	-3.03662	3.20725	-16.4985	8.47e-48	2.88e-46	Down
CPEB3	-1.39753	6.4443	-16.4968	8.62e-48	2.93e-46	Down
RCL1	1.0795	8.7368	16.4841	9.81e-48	3.33e-46	Up
HEATR1	1.12626	10.1326	16.4697	1.14e-47	3.85e-46	Up
SNTG2	-1.50374	0.525847	-16.4685	1.15e-47	3.89e-46	Down
C11orf86	-5.40428	4.4407	-16.4675	1.16e-47	3.92e-46	Down
ANPEP	-4.77157	9.79792	-16.4593	1.26e-47	4.26e-46	Down
CNGA3	-3.70339	2.28673	-16.4516	1.37e-47	4.59e-46	Down
E2F6	0.928781	8.26367	16.4413	1.52e-47	5.09e-46	Up
TGIF2	1.87019	9.48858	16.4412	1.52e-47	5.09e-46	Up
SCD	2.57154	12.965	16.4394	1.54e-47	5.17e-46	Up
ASPG	-4.68752	2.79538	-16.4383	1.56e-47	5.22e-46	Down
NBPF1	-1.55284	8.77036	-16.4299	1.7e-47	5.68e-46	Down
GLRA4	-2.45848	1.25599	-16.4199	1.88e-47	6.28e-46	Down
KLK6	6.5955	6.39136	16.4187	1.91e-47	6.34e-46	Up
E2F7	1.93915	7.06302	16.4165	1.95e-47	6.48e-46	Up
SND1	0.918639	12.5868	16.4163	1.95e-47	6.48e-46	Up
TTYH3	1.47582	11.6837	16.4125	2.03e-47	6.72e-46	Up
NEDD4L	-1.40243	10.3106	-16.4123	2.03e-47	6.72e-46	Down
NFXL1	1.02982	8.25176	16.411	2.06e-47	6.81e-46	Up
GRIN2A	-3.0829	1.78594	-16.3997	2.31e-47	7.62e-46	Down
KLB	-2.55313	3.66382	-16.3967	2.38e-47	7.84e-46	Down
PACSIN2	-1.24012	10.1816	-16.3825	2.75e-47	9.05e-46	Down
ATP8B1	-1.65942	11.8757	-16.382	2.77e-47	9.07e-46	Down
CHODL	-3.58001	2.65619	-16.3819	2.77e-47	9.07e-46	Down
KLHL35	2.93562	5.35185	16.3742	2.99e-47	9.79e-46	Up
RHAG	-1.12405	0.191472	-16.3687	3.17e-47	1.03e-45	Down
LOC282997	-1.42664	5.28239	-16.3653	3.28e-47	1.07e-45	Down
P2RY12	-3.02865	2.22038	-16.3602	3.45e-47	1.12e-45	Down
ADH1B	-6.75276	5.67248	-16.3566	3.58e-47	1.16e-45	Down
LOC283267	-1.15249	7.55712	-16.3541	3.67e-47	1.19e-45	Down
MGST3	-1.07064	10.8516	-16.3522	3.74e-47	1.21e-45	Down
PJA2	-1.35866	10.6375	-16.3483	3.9e-47	1.26e-45	Down
SLC12A8	1.25671	8.6834	16.3426	4.13e-47	1.33e-45	Up
RECQL4	2.09762	9.14089	16.3422	4.14e-47	1.33e-45	Up
PAICS	1.31115	11.9671	16.3421	4.15e-47	1.33e-45	Up
HAUS6	1.14027	9.04427	16.34	4.24e-47	1.36e-45	Up
EPHB4	1.20388	11.5406	16.3396	4.26e-47	1.36e-45	Up
C9orf4	-1.49602	0.420679	-16.3395	4.26e-47	1.36e-45	Down
IARS	1.01381	11.694	16.3344	4.49e-47	1.43e-45	Up
HSD17B2	-4.24536	7.60832	-16.3318	4.61e-47	1.47e-45	Down
LOC389493	-2.15583	0.673229	-16.3278	4.8e-47	1.53e-45	Down
SULT1A1	-2.59263	8.70162	-16.3219	5.09e-47	1.62e-45	Down
BCAR3	-1.5375	8.53166	-16.3153	5.44e-47	1.73e-45	Down
MTM1	-1.37603	8.85581	-16.2889	7.12e-47	2.26e-45	Down
CAB39	-0.82929	11.2096	-16.2583	9.7e-47	3.07e-45	Down
SDCCAG3	1.03175	9.75339	16.256	9.93e-47	3.14e-45	Up
SSTR2	-2.80317	3.36768	-16.2545	1.01e-46	3.18e-45	Down
NRSN1	-2.6123	1.03119	-16.2523	1.03e-46	3.25e-45	Down
CALCOCO2	-0.871609	11.0676	-16.2486	1.07e-46	3.37e-45	Down
LCN6	-1.72247	0.556814	-16.2461	1.1e-46	3.45e-45	Down
DUSP26	-2.98629	2.42396	-16.2427	1.14e-46	3.57e-45	Down
CEP55	1.68463	9.4529	16.2378	1.19e-46	3.74e-45	Up
SRI	-1.60542	11.7125	-16.2341	1.24e-46	3.88e-45	Down
GLS2	2.86924	6.32222	16.2311	1.28e-46	3.99e-45	Up
RNF185	-0.785102	9.54202	-16.231	1.28e-46	3.99e-45	Down
ANGPTL1	-5.06324	4.10091	-16.2248	1.36e-46	4.24e-45	Down
C1orf150	-2.59493	1.6242	-16.2214	1.41e-46	4.39e-45	Down
WDR62	1.92245	7.81613	16.2152	1.5e-46	4.66e-45	Up
RBM47	-1.23652	11.6318	-16.2001	1.75e-46	5.43e-45	Down
ULBP1	2.76729	3.74559	16.1836	2.07e-46	6.4e-45	Up
NCL	0.999039	14.0328	16.1686	2.41e-46	7.44e-45	Up
LRRN2	-4.08849	5.74135	-16.166	2.47e-46	7.63e-45	Down
GFRA3	-3.88542	3.24905	-16.1595	2.64e-46	8.14e-45	Down
JPH1	1.71026	9.0644	16.1535	2.81e-46	8.63e-45	Up
RYR3	-2.35163	3.30842	-16.1467	3e-46	9.23e-45	Down
CTSG	-4.69775	3.13312	-16.1426	3.13e-46	9.61e-45	Down
HELLS	1.69917	7.67959	16.1418	3.16e-46	9.67e-45	Up
NME1	1.5853	11.0986	16.1407	3.19e-46	9.76e-45	Up
MBNL1	-0.835315	11.2974	-16.1406	3.2e-46	9.76e-45	Down
SCG3	-3.96806	2.50926	-16.1355	3.36e-46	1.03e-44	Down
MYOM1	-3.57122	4.77962	-16.1305	3.54e-46	1.08e-44	Down
ARNTL2	2.1991	7.00295	16.1273	3.65e-46	1.11e-44	Up
GDPD2	-4.36549	4.67529	-16.1272	3.66e-46	1.11e-44	Down
LOC389033	-0.732325	0.155104	-16.1263	3.69e-46	1.12e-44	Down
POLR1C	1.15681	9.37136	16.1018	4.73e-46	1.43e-44	Up
CHPF	1.54233	11.4152	16.0897	5.35e-46	1.62e-44	Up
SLC30A4	-1.97557	5.73861	-16.0868	5.51e-46	1.66e-44	Down
RPGRIP1L	1.46594	7.12755	16.0822	5.77e-46	1.74e-44	Up
TCP11L1	-1.22485	7.08504	-16.0777	6.03e-46	1.82e-44	Down
FAM40B	2.48793	6.48096	16.0769	6.08e-46	1.83e-44	Up
STRA6	4.82373	6.10483	16.0768	6.09e-46	1.83e-44	Up
NEK2	1.50914	9.00958	16.0755	6.17e-46	1.85e-44	Up
AFF3	-3.42962	4.29375	-16.0746	6.23e-46	1.86e-44	Down
GALNT6	2.00202	10.2727	16.0721	6.39e-46	1.91e-44	Up
DBF4	1.24999	8.74637	16.0705	6.49e-46	1.94e-44	Up
HSD17B11	-1.31259	11.1217	-16.0704	6.49e-46	1.94e-44	Down
KIF20A	1.67975	8.83263	16.068	6.65e-46	1.98e-44	Up
PAFAH1B3	1.30448	9.68249	16.0543	7.65e-46	2.27e-44	Up
NUDCD1	1.36212	9.33008	16.0539	7.68e-46	2.28e-44	Up
CENPF	1.68254	10.4474	16.0516	7.85e-46	2.33e-44	Up
SNAP91	-3.06445	1.60307	-16.0455	8.35e-46	2.47e-44	Down
TMEM9B	-0.872199	10.3324	-16.0401	8.83e-46	2.61e-44	Down
FANCB	1.89603	5.03201	16.037	9.11e-46	2.69e-44	Up
MCM10	1.88056	7.79181	16.0368	9.12e-46	2.69e-44	Up
ADD1	-0.805079	11.9097	-16.033	9.48e-46	2.79e-44	Down
FAM23A	-4.44791	6.89224	-16.0218	1.06e-45	3.12e-44	Down
TMEM59L	-3.49004	2.61217	-16.0214	1.07e-45	3.12e-44	Down
C2orf70	3.26937	4.80226	16.0065	1.24e-45	3.63e-44	Up
P2RY1	-3.11865	5.54966	-16.0058	1.25e-45	3.65e-44	Down
TOP1MT	1.75728	10.2057	16.0035	1.28e-45	3.73e-44	Up
NKX2-3	-3.18318	5.92897	-15.9956	1.38e-45	4.03e-44	Down
SH2D6	-3.5729	1.85542	-15.9947	1.4e-45	4.06e-44	Down
FUT9	-2.05873	0.429324	-15.9899	1.46e-45	4.26e-44	Down
POP1	1.45915	8.11176	15.9893	1.47e-45	4.28e-44	Up
EIF2S2	1.19067	11.508	15.9824	1.58e-45	4.58e-44	Up
PGM1	-1.68967	10.3659	-15.9809	1.6e-45	4.65e-44	Down
PHLDA1	2.44964	11.1869	15.978	1.65e-45	4.78e-44	Up
EFHC2	-3.08792	2.35251	-15.9763	1.68e-45	4.85e-44	Down
E2F3	1.05121	9.23546	15.9755	1.69e-45	4.88e-44	Up
GSN	-2.08813	12.6218	-15.9659	1.87e-45	5.37e-44	Down
FAM19A2	-2.20957	2.61691	-15.9655	1.87e-45	5.39e-44	Down
BAALC	-3.00299	3.18125	-15.9627	1.93e-45	5.53e-44	Down
SNTB1	2.12982	9.95933	15.9621	1.94e-45	5.56e-44	Up
CLEC4M	-1.92398	0.540365	-15.9548	2.09e-45	5.97e-44	Down
RAB27A	-1.73133	8.78617	-15.9546	2.09e-45	5.98e-44	Down
ZNF473	1.04389	8.11236	15.9469	2.26e-45	6.45e-44	Up
DARS	0.995995	11.0571	15.946	2.28e-45	6.5e-44	Up
CCDC69	-2.75917	8.55857	-15.9412	2.39e-45	6.82e-44	Down
MCHR2	-0.904894	0.191239	-15.9397	2.43e-45	6.91e-44	Down
C6orf186	-2.96962	1.78934	-15.9248	2.82e-45	8.02e-44	Down
TRPM6	-5.02523	6.44723	-15.9153	3.11e-45	8.81e-44	Down
CYTSA	-1.09238	9.98693	-15.9151	3.11e-45	8.82e-44	Down
ADAMDEC1	-4.31318	8.4991	-15.9069	3.38e-45	9.57e-44	Down
C2orf15	1.35715	6.60744	15.8988	3.67e-45	1.04e-43	Up
C19orf48	1.61064	10.752	15.8981	3.7e-45	1.04e-43	Up
VWC2	-2.08932	1.12069	-15.8966	3.75e-45	1.06e-43	Down
SEMA6D	-3.47814	6.93249	-15.892	3.93e-45	1.11e-43	Down
FGL2	-3.22422	8.41268	-15.8918	3.94e-45	1.11e-43	Down
KCNB1	-3.26127	1.55381	-15.886	4.18e-45	1.17e-43	Down
DPEP1	5.80495	10.2479	15.8824	4.33e-45	1.21e-43	Up
MYL6	-1.14954	13.7822	-15.882	4.35e-45	1.22e-43	Down
C2CD4A	3.8217	7.67291	15.8806	4.41e-45	1.23e-43	Up
VAMP2	-1.33635	9.60172	-15.8799	4.44e-45	1.24e-43	Down
GAB1	-1.2059	9.07619	-15.8779	4.53e-45	1.26e-43	Down
TMEM196	-1.09185	0.316357	-15.8752	4.66e-45	1.3e-43	Down
LDHD	-3.68176	7.22295	-15.8667	5.07e-45	1.41e-43	Down
PDE2A	-2.96567	5.82372	-15.8624	5.3e-45	1.47e-43	Down
ACAA2	-1.7608	11.2983	-15.8619	5.32e-45	1.47e-43	Down
RFWD3	0.985935	10.1153	15.8618	5.33e-45	1.47e-43	Up
SCN2B	-3.70921	2.63135	-15.8605	5.4e-45	1.49e-43	Down
PDE8A	-1.13477	9.66001	-15.8573	5.58e-45	1.54e-43	Down
SCNN1B	-5.78603	5.99636	-15.8537	5.78e-45	1.59e-43	Down
TRMT1	1.22229	9.65295	15.8511	5.93e-45	1.63e-43	Up
BUB1	1.48926	9.4311	15.8487	6.08e-45	1.67e-43	Up
WDR74	1.13723	9.65039	15.8317	7.22e-45	1.98e-43	Up
CELSR1	2.40236	9.27463	15.8302	7.32e-45	2.01e-43	Up
RNF112	-2.58875	3.39529	-15.8227	7.9e-45	2.16e-43	Down
HPGD	-3.46737	8.97564	-15.8221	7.95e-45	2.17e-43	Down
JPH4	-2.65988	2.73742	-15.8118	8.81e-45	2.41e-43	Down
PPY	-1.96337	0.421762	-15.8046	9.48e-45	2.59e-43	Down
TMEM161A	1.10997	9.61487	15.7923	1.07e-44	2.92e-43	Up
PDZD4	-3.4894	4.30673	-15.7908	1.09e-44	2.96e-43	Down
AP1S3	1.59042	8.21508	15.784	1.17e-44	3.17e-43	Up
C12orf53	-2.73398	3.34557	-15.7787	1.23e-44	3.34e-43	Down
CPM	-2.93986	8.2161	-15.7783	1.23e-44	3.34e-43	Down
WDR3	1.01028	9.90851	15.7768	1.25e-44	3.39e-43	Up
CRYBA2	-3.30321	1.80557	-15.7745	1.28e-44	3.47e-43	Down
TRPV3	-3.40995	2.70119	-15.7705	1.34e-44	3.6e-43	Down
ZNF280C	1.42072	6.81211	15.7704	1.34e-44	3.6e-43	Up
FTSJ2	0.772009	9.507	15.7651	1.41e-44	3.8e-43	Up
BEST2	-6.00041	3.73814	-15.7457	1.71e-44	4.61e-43	Down
EGFL6	3.37752	5.27559	15.7453	1.72e-44	4.62e-43	Up
NOM1	0.918436	9.22151	15.7445	1.74e-44	4.65e-43	Up
EPHA6	-2.74981	0.982794	-15.744	1.74e-44	4.67e-43	Down
EEF1E1	1.14943	8.47217	15.7389	1.84e-44	4.9e-43	Up
NBLA00301	-4.61549	3.305	-15.7388	1.84e-44	4.9e-43	Down
TRAP1	1.17399	11.7106	15.7383	1.85e-44	4.92e-43	Up
TTC22	-2.0018	7.52615	-15.7382	1.85e-44	4.92e-43	Down
GNG13	-3.16353	1.53753	-15.7327	1.95e-44	5.2e-43	Down
FANCI	1.38851	9.99268	15.7322	1.96e-44	5.21e-43	Up
DCAF13	1.27632	10.3267	15.7221	2.17e-44	5.76e-43	Up
SHCBP1	1.49772	7.98428	15.7187	2.25e-44	5.96e-43	Up
GLIPR2	-2.23852	8.45014	-15.7063	2.55e-44	6.74e-43	Down
FAM176A	3.44427	6.52305	15.7028	2.64e-44	6.97e-43	Up
RIOK1	0.865661	9.21901	15.6933	2.9e-44	7.66e-43	Up
POLR2D	0.865246	9.45277	15.6791	3.35e-44	8.82e-43	Up
ABCD3	-1.11081	10.4745	-15.6755	3.47e-44	9.14e-43	Down
ANAPC7	0.82688	10.1147	15.674	3.52e-44	9.26e-43	Up
SEC14L5	-2.85666	2.96263	-15.6659	3.82e-44	1e-42	Down
FHL1	-3.39965	8.86946	-15.6546	4.28e-44	1.12e-42	Down
DHX34	1.24632	9.351	15.6473	4.61e-44	1.21e-42	Up
SGK1	-2.46933	9.539	-15.6409	4.91e-44	1.28e-42	Down
PRDM12	1.81867	2.4921	15.6406	4.92e-44	1.29e-42	Up
LOC541471	1.55901	7.23807	15.6399	4.96e-44	1.29e-42	Up
DPYSL5	-2.75956	1.31703	-15.6322	5.36e-44	1.4e-42	Down
GRPEL2	1.0077	8.9115	15.6303	5.46e-44	1.42e-42	Up
PMAIP1	1.85024	7.82188	15.6296	5.5e-44	1.43e-42	Up
ALK	-2.26906	1.11516	-15.624	5.82e-44	1.51e-42	Down
CYP27B1	1.79197	5.82072	15.6228	5.89e-44	1.53e-42	Up
CNTD2	3.55491	4.91094	15.6208	6.01e-44	1.56e-42	Up
GRHL1	2.44347	6.42859	15.617	6.24e-44	1.61e-42	Up
NONO	0.941913	13.092	15.6113	6.61e-44	1.71e-42	Up
KRT27	-0.99113	0.26482	-15.6112	6.62e-44	1.71e-42	Down
CMTM8	1.19602	7.79297	15.6024	7.23e-44	1.86e-42	Up
GREM2	-4.90199	5.61631	-15.6023	7.23e-44	1.86e-42	Down
PNO1	1.09156	9.37981	15.5997	7.43e-44	1.91e-42	Up
B3GALT4	-1.67622	7.71749	-15.5969	7.63e-44	1.96e-42	Down
RANGAP1	0.987385	11.3873	15.5963	7.68e-44	1.97e-42	Up
CXCL12	-2.96873	8.79313	-15.5899	8.2e-44	2.1e-42	Down
PSAT1	2.5488	9.78327	15.5859	8.52e-44	2.18e-42	Up
SRPX	-3.11358	6.36486	-15.5731	9.69e-44	2.47e-42	Down
CKAP2L	1.58096	7.80725	15.5706	9.94e-44	2.54e-42	Up
MMP28	-3.62352	6.87438	-15.5634	1.07e-43	2.72e-42	Down
HOMER1	2.10146	6.95931	15.5584	1.12e-43	2.86e-42	Up
TSPAN7	-3.22068	8.51008	-15.5578	1.13e-43	2.87e-42	Down
ABCB5	-2.84353	1.19041	-15.5542	1.17e-43	2.97e-42	Down
MPP5	-0.930726	9.48068	-15.5507	1.21e-43	3.08e-42	Down
NOVA1	-3.63946	3.20611	-15.5434	1.3e-43	3.3e-42	Down
FAM72A	1.84663	5.22453	15.5312	1.47e-43	3.73e-42	Up
GPATCH4	1.04851	9.77312	15.5274	1.53e-43	3.87e-42	Up
ABCA9	-3.61263	3.36773	-15.525	1.57e-43	3.96e-42	Down
RELL1	-1.64105	7.98999	-15.5163	1.71e-43	4.31e-42	Down
CLDN2	5.87336	9.76011	15.5149	1.74e-43	4.37e-42	Up
CASD1	-1.28268	8.7544	-15.5129	1.77e-43	4.45e-42	Down
AGAP3	1.03158	10.5907	15.5121	1.79e-43	4.48e-42	Up
TIMP1	1.88804	12.1665	15.5056	1.91e-43	4.78e-42	Up
FXYD5	1.89825	10.7531	15.4923	2.18e-43	5.45e-42	Up
CWH43	-6.03096	4.17084	-15.4904	2.22e-43	5.55e-42	Down
COL7A1	3.6565	8.18779	15.4861	2.32e-43	5.78e-42	Up
MALL	-2.23872	11.1668	-15.4856	2.33e-43	5.81e-42	Down
UNC80	-2.02576	1.02758	-15.4855	2.33e-43	5.81e-42	Down
RAD18	1.06419	8.47343	15.4753	2.58e-43	6.43e-42	Up
ABI3BP	-3.91055	6.37848	-15.4747	2.6e-43	6.45e-42	Down
C1orf173	-2.01881	0.828776	-15.4716	2.68e-43	6.65e-42	Down
PTPRH	-2.24241	9.70499	-15.468	2.78e-43	6.89e-42	Down
CELSR3	2.67731	8.27748	15.4636	2.9e-43	7.19e-42	Up
FAM72D	1.78787	6.28386	15.4557	3.14e-43	7.77e-42	Up
ADRA1A	-1.90278	0.867738	-15.4497	3.34e-43	8.24e-42	Down
CPT1A	-1.33686	11.4445	-15.439	3.71e-43	9.16e-42	Down
ENHO	-2.94786	3.25373	-15.4363	3.81e-43	9.4e-42	Down
MPHOSPH10	0.785089	9.74248	15.4321	3.98e-43	9.79e-42	Up
MCM3	1.08167	11.645	15.432	3.98e-43	9.79e-42	Up
DNER	-3.48652	2.63089	-15.427	4.19e-43	1.03e-41	Down
EPHA5	-2.10284	1.12021	-15.4245	4.29e-43	1.05e-41	Down
KIF4A	1.51579	9.41493	15.4213	4.43e-43	1.09e-41	Up
GPM6B	-2.89957	5.22133	-15.4208	4.45e-43	1.09e-41	Down
C14orf180	-2.87173	0.915445	-15.4168	4.63e-43	1.13e-41	Down
HTR1D	3.93046	6.34614	15.4093	4.99e-43	1.22e-41	Up
MADCAM1	-4.07049	3.21511	-15.4074	5.09e-43	1.24e-41	Down
CNST	-0.916267	9.08188	-15.407	5.11e-43	1.24e-41	Down
CCBP2	-2.54346	4.07346	-15.4035	5.29e-43	1.29e-41	Down
TST	-1.63832	11.5333	-15.4032	5.31e-43	1.29e-41	Down
PADI2	-4.07552	9.62754	-15.3954	5.74e-43	1.39e-41	Down
TCF7	1.9824	9.81358	15.3944	5.8e-43	1.4e-41	Up
SIAE	-1.71795	10.8313	-15.3925	5.91e-43	1.43e-41	Down
BEND4	-2.73761	1.93627	-15.3918	5.95e-43	1.44e-41	Down
RAE1	1.29356	10.1227	15.3881	6.17e-43	1.49e-41	Up
JOSD1	-0.921473	10.759	-15.3834	6.47e-43	1.56e-41	Down
PTPRZ1	-3.7457	2.21938	-15.3811	6.62e-43	1.6e-41	Down
C20orf200	-3.24211	2.13127	-15.3787	6.78e-43	1.63e-41	Down
PTGS1	-2.82612	8.30181	-15.3729	7.18e-43	1.73e-41	Down
CCDC41	1.08113	8.00334	15.369	7.47e-43	1.79e-41	Up
SLITRK3	-3.82785	1.9206	-15.3674	7.59e-43	1.82e-41	Down
C5orf40	-1.92753	1.17958	-15.3661	7.69e-43	1.84e-41	Down
GRIA3	-2.4959	1.91376	-15.3624	7.98e-43	1.91e-41	Down
NR5A2	-2.60018	7.57962	-15.3604	8.14e-43	1.94e-41	Down
RUNX1	1.44637	10.4925	15.3598	8.19e-43	1.95e-41	Up
BMX	-3.61519	3.73715	-15.3594	8.22e-43	1.96e-41	Down
NOL8	0.924813	9.69525	15.359	8.26e-43	1.97e-41	Up
COL10A1	6.22627	6.80429	15.3517	8.88e-43	2.11e-41	Up
FAM163B	-2.08924	0.944894	-15.3439	9.6e-43	2.28e-41	Down
CCDC99	1.15211	8.1262	15.3367	1.03e-42	2.45e-41	Up
SEPP1	-3.45019	11.8405	-15.3328	1.07e-42	2.54e-41	Down
TRIM27	0.722827	10.5704	15.3312	1.09e-42	2.58e-41	Up
GDF15	2.6959	11.018	15.3293	1.11e-42	2.63e-41	Up
CCDC68	-2.40555	7.74042	-15.3273	1.13e-42	2.68e-41	Down
SYNJ2BP	-0.861308	9.92815	-15.3257	1.15e-42	2.72e-41	Down
C1orf107	0.930579	9.46713	15.3217	1.2e-42	2.82e-41	Up
EXOSC2	0.970688	9.13075	15.3214	1.2e-42	2.83e-41	Up
PTCD1	0.91366	9.23823	15.3183	1.24e-42	2.91e-41	Up
GPM6A	-5.19495	2.91464	-15.3177	1.25e-42	2.93e-41	Down
FAM75C1	-1.02804	0.368212	-15.3164	1.26e-42	2.96e-41	Down
MAPK4	-3.89566	2.48452	-15.3146	1.29e-42	3.01e-41	Down
FOSL1	3.32923	7.52121	15.3043	1.42e-42	3.33e-41	Up
RRP1	1.16315	9.67842	15.302	1.46e-42	3.41e-41	Up
TOP2A	1.51719	11.6438	15.3013	1.47e-42	3.43e-41	Up
LITAF	-1.20596	11.6351	-15.3005	1.48e-42	3.45e-41	Down
PKD1L2	-2.18184	1.2322	-15.2999	1.49e-42	3.47e-41	Down
PHF16	1.39483	8.70354	15.2986	1.51e-42	3.51e-41	Up
ATG9B	3.23827	5.66132	15.2974	1.53e-42	3.55e-41	Up
SLC17A4	-4.07993	5.82549	-15.2899	1.64e-42	3.82e-41	Down
B4GALNT2	-6.33749	3.80624	-15.2878	1.68e-42	3.9e-41	Down
WSCD1	-3.62536	6.61731	-15.2843	1.74e-42	4.03e-41	Down
KIF18A	1.48548	7.47916	15.2786	1.84e-42	4.26e-41	Up
HAUS5	1.14929	8.56826	15.2709	1.99e-42	4.59e-41	Up
B3GNTL1	1.4904	6.63555	15.2706	1.99e-42	4.6e-41	Up
C1orf109	0.928226	8.41985	15.2614	2.19e-42	5.04e-41	Up
TOM1L2	-1.21855	9.96158	-15.2599	2.22e-42	5.11e-41	Down
LPAR1	-2.65115	6.97401	-15.259	2.24e-42	5.15e-41	Down
C17orf91	-1.96863	6.75137	-15.2511	2.42e-42	5.57e-41	Down
CA10	-2.27747	1.14692	-15.2464	2.54e-42	5.83e-41	Down
MT1G	-4.08365	8.722	-15.2462	2.54e-42	5.83e-41	Down
POLD2	1.15813	11.3794	15.2437	2.61e-42	5.97e-41	Up
METTL11A	0.986832	9.26279	15.2432	2.62e-42	6e-41	Up
HRASLS2	-3.79218	3.81992	-15.2419	2.65e-42	6.07e-41	Down
CTNNA3	-2.04724	0.862272	-15.2416	2.66e-42	6.08e-41	Down
PAFAH2	-1.18934	9.31883	-15.234	2.87e-42	6.55e-41	Down
CDCA5	1.51248	9.69013	15.2275	3.06e-42	6.98e-41	Up
RRP15	0.920253	9.04288	15.2264	3.1e-42	7.05e-41	Up
NUP107	0.944516	9.8176	15.2211	3.26e-42	7.42e-41	Up
ANO5	-4.49335	4.02312	-15.2191	3.33e-42	7.56e-41	Down
HTR3C	-2.48022	0.812912	-15.2185	3.35e-42	7.6e-41	Down
ANKZF1	1.00997	9.62381	15.2123	3.56e-42	8.07e-41	Up
VEGFA	1.53255	11.4772	15.2099	3.65e-42	8.26e-41	Up
SLC10A2	-2.66879	0.574996	-15.2091	3.68e-42	8.32e-41	Down
RRS1	1.36574	9.81399	15.2037	3.88e-42	8.77e-41	Up
TRANK1	-2.00135	9.31904	-15.2012	3.98e-42	8.98e-41	Down
CCL14	-3.46092	5.48214	-15.2007	4e-42	9.01e-41	Down
EME1	1.6803	6.23434	15.2005	4.01e-42	9.02e-41	Up
ASPM	1.53228	9.04785	15.1984	4.09e-42	9.2e-41	Up
TESC	3.80428	8.86427	15.1956	4.21e-42	9.45e-41	Up
FLJ41941	-1.41006	0.530343	-15.1907	4.42e-42	9.91e-41	Down
C6orf167	1.2156	8.00322	15.1899	4.46e-42	9.99e-41	Up
C12orf11	1.20895	9.36631	15.189	4.49e-42	1.01e-40	Up
RUNDC3B	-2.83673	4.80389	-15.1842	4.71e-42	1.05e-40	Down
LMTK3	2.48989	6.6206	15.1814	4.85e-42	1.08e-40	Up
KIF23	1.46665	8.97876	15.181	4.87e-42	1.09e-40	Up
BRP44L	-1.36474	9.2152	-15.1808	4.88e-42	1.09e-40	Down
SDHD	-1.01797	11.1812	-15.1794	4.94e-42	1.1e-40	Down
OSTalpha	-4.22034	4.88495	-15.1736	5.24e-42	1.17e-40	Down
CBX7	-1.7518	8.99722	-15.1675	5.57e-42	1.24e-40	Down
SFRP5	-4.04311	2.09148	-15.1524	6.47e-42	1.44e-40	Down
RFC4	1.18118	8.72474	15.1486	6.71e-42	1.49e-40	Up
STAB2	-2.9994	2.35746	-15.1399	7.32e-42	1.62e-40	Down
SH3TC2	3.01705	7.48945	15.1357	7.64e-42	1.69e-40	Up
C13orf37	1.38427	9.45167	15.1316	7.95e-42	1.76e-40	Up
PTN	-2.86334	5.54826	-15.1236	8.61e-42	1.9e-40	Down
LMX1A	-2.84896	1.21669	-15.1236	8.61e-42	1.9e-40	Down
FAM181B	-2.64773	1.65596	-15.1216	8.79e-42	1.94e-40	Down
C17orf53	1.48482	6.88573	15.1198	8.94e-42	1.97e-40	Up
MT1X	-2.42597	8.53264	-15.1132	9.55e-42	2.1e-40	Down
MCM7	1.15578	12.0984	15.1054	1.03e-41	2.27e-40	Up
SDCBP2	-2.80012	9.77353	-15.1027	1.06e-41	2.32e-40	Down
GTSE1	1.45738	8.5309	15.1025	1.06e-41	2.33e-40	Up
CSTF3	0.744693	9.25483	15.1022	1.07e-41	2.33e-40	Up
RPF2	1.12361	8.97545	15.0999	1.09e-41	2.38e-40	Up
LOC388796	1.9219	9.32493	15.099	1.1e-41	2.4e-40	Up
CCAR1	0.743746	10.4634	15.0908	1.19e-41	2.6e-40	Up
CENPN	1.23302	9.01138	15.0884	1.22e-41	2.66e-40	Up
TNFRSF1A	-0.910743	11.1337	-15.0823	1.3e-41	2.83e-40	Down
ZMAT4	-1.909	0.780906	-15.0773	1.36e-41	2.97e-40	Down
GRAMD1A	1.44602	10.3481	15.0694	1.48e-41	3.2e-40	Up
MT1DP	-2.18037	1.33506	-15.0666	1.52e-41	3.29e-40	Down
MEX3A	2.73844	7.91063	15.0625	1.58e-41	3.43e-40	Up
AURKA	1.54105	9.84421	15.0578	1.66e-41	3.59e-40	Up
CDK1	1.53893	10.153	15.0454	1.87e-41	4.05e-40	Up
SECTM1	-3.33861	8.52423	-15.0435	1.91e-41	4.12e-40	Down
STMN2	-4.34711	5.18159	-15.0374	2.03e-41	4.38e-40	Down
EXO1	1.6415	7.88884	15.0347	2.08e-41	4.49e-40	Up
SLITRK2	-2.38178	1.33702	-15.0313	2.15e-41	4.64e-40	Down
LOC401093	-2.39272	6.3037	-15.031	2.16e-41	4.65e-40	Down
WDR4	1.38964	8.37843	15.0295	2.19e-41	4.71e-40	Up
KIF2C	1.46502	9.40138	15.0283	2.22e-41	4.76e-40	Up
WDR46	0.845303	10.1788	15.028	2.23e-41	4.77e-40	Up
RCN1	1.33516	11.7729	15.0253	2.29e-41	4.9e-40	Up
WDR77	1.28257	10.3962	15.024	2.32e-41	4.96e-40	Up
PPAP2B	-1.5321	9.42277	-15.0232	2.33e-41	4.99e-40	Down
SHMT2	1.29732	11.4929	15.0148	2.54e-41	5.42e-40	Up
ARHGAP20	-2.99417	3.95591	-15.0129	2.59e-41	5.52e-40	Down
ACTL6B	-1.35501	0.29769	-15.008	2.71e-41	5.78e-40	Down
CAND2	-2.15937	4.59053	-15.0077	2.72e-41	5.79e-40	Down
INPP5A	-0.920751	9.33677	-15.0025	2.86e-41	6.09e-40	Down
OXTR	2.4242	5.06603	14.9977	3.01e-41	6.39e-40	Up
EPB41L3	-3.41812	7.82933	-14.9942	3.11e-41	6.61e-40	Down
MTHFD2	1.4072	10.6125	14.9937	3.13e-41	6.63e-40	Up
HM13	1.11497	12.0317	14.9902	3.24e-41	6.86e-40	Up
ZDHHC22	-2.20624	0.810326	-14.9779	3.66e-41	7.74e-40	Down
ANK2	-3.56324	6.02391	-14.9757	3.74e-41	7.9e-40	Down
NTN1	-2.96201	6.56606	-14.9723	3.86e-41	8.16e-40	Down
XPO1	0.661644	11.8472	14.9722	3.87e-41	8.16e-40	Up
GTPBP3	1.00163	8.62651	14.9696	3.97e-41	8.37e-40	Up
CCNF	1.38666	9.12657	14.9659	4.12e-41	8.68e-40	Up
PLCL2	-2.8888	6.80711	-14.9649	4.16e-41	8.75e-40	Down
KLHL1	-0.952944	0.210932	-14.9639	4.2e-41	8.82e-40	Down
MYPN	-2.88634	2.11738	-14.9583	4.44e-41	9.32e-40	Down
CDHR5	-2.70028	10.9621	-14.9547	4.6e-41	9.65e-40	Down
HTR3B	-0.596097	0.107993	-14.9489	4.87e-41	1.02e-39	Down
C1orf115	-2.36302	9.21912	-14.9483	4.9e-41	1.03e-39	Down
VARS	1.01672	11.4133	14.9472	4.96e-41	1.04e-39	Up
NEGR1	-3.20307	6.00875	-14.9422	5.21e-41	1.09e-39	Down
OGN	-5.59161	4.7037	-14.9381	5.42e-41	1.13e-39	Down
TCEAL5	-2.13653	2.07113	-14.9373	5.47e-41	1.14e-39	Down
EZH2	1.2501	9.21575	14.937	5.49e-41	1.14e-39	Up
PPAN	1.09118	9.55335	14.9332	5.69e-41	1.18e-39	Up
ZNF259	0.865669	9.84823	14.9303	5.86e-41	1.22e-39	Up
DNASE1L3	-4.96716	4.52433	-14.9268	6.07e-41	1.26e-39	Down
LOC646851	2.08751	4.92045	14.9236	6.26e-41	1.3e-39	Up
ADCY9	-1.48855	9.02748	-14.9225	6.33e-41	1.31e-39	Down
NSUN5	0.974497	9.73334	14.9225	6.33e-41	1.31e-39	Up
MUL1	-0.796119	9.46656	-14.9195	6.52e-41	1.35e-39	Down
DSN1	1.22003	9.26254	14.9184	6.59e-41	1.36e-39	Up
MPPE1	-1.15475	8.7253	-14.9011	7.82e-41	1.61e-39	Down
WDR78	-2.60487	5.61528	-14.8949	8.32e-41	1.71e-39	Down
CRADD	-1.09697	7.09621	-14.8915	8.6e-41	1.77e-39	Down
NOL10	0.720228	9.75998	14.8875	8.95e-41	1.84e-39	Up
GFI1B	-2.94256	2.02632	-14.8832	9.34e-41	1.92e-39	Down
ZBTB12	1.44869	7.3911	14.8757	1.01e-40	2.06e-39	Up
SLC9A9	-2.67098	5.45901	-14.8699	1.07e-40	2.18e-39	Down
HECTD3	-0.940539	10.6488	-14.8696	1.07e-40	2.19e-39	Down
C21orf88	-4.17646	2.57579	-14.8695	1.07e-40	2.19e-39	Down
SEZ6	-2.51926	1.19355	-14.8668	1.1e-40	2.25e-39	Down
EIF5A2	1.32944	7.58476	14.8615	1.16e-40	2.36e-39	Up
CPSF3	0.765321	9.94049	14.8591	1.18e-40	2.42e-39	Up
DBNDD1	2.28729	8.46258	14.854	1.25e-40	2.54e-39	Up
MTERFD1	1.16634	8.53009	14.8525	1.27e-40	2.58e-39	Up
KAT2B	-1.83137	7.91216	-14.8511	1.28e-40	2.61e-39	Down
NEFL	-4.24225	2.87758	-14.8508	1.29e-40	2.62e-39	Down
SNHG1	1.6189	9.54498	14.8504	1.29e-40	2.62e-39	Up
SCP2	-0.972164	11.5635	-14.8452	1.36e-40	2.76e-39	Down
MSI2	1.1641	8.46734	14.8424	1.4e-40	2.83e-39	Up
ILF3	0.727398	12.6376	14.84	1.43e-40	2.9e-39	Up
SCAMP2	-0.979333	11.7015	-14.8383	1.46e-40	2.94e-39	Down
GRIA4	-2.70459	2.14076	-14.8328	1.54e-40	3.11e-39	Down
ASB2	-3.45309	5.85049	-14.8264	1.64e-40	3.3e-39	Down
SLC13A1	-1.9436	0.406587	-14.8253	1.66e-40	3.34e-39	Down
CPOX	0.875801	9.20564	14.822	1.71e-40	3.45e-39	Up
NOP14	0.905324	10.5462	14.8217	1.72e-40	3.45e-39	Up
PNPT1	1.06415	9.80634	14.821	1.73e-40	3.47e-39	Up
KPNA2	1.27261	11.3554	14.8187	1.77e-40	3.55e-39	Up
RPAP3	0.704052	9.27422	14.8151	1.83e-40	3.67e-39	Up
FLVCR2	-2.33023	6.94806	-14.811	1.91e-40	3.82e-39	Down
UBE2S	1.60482	9.25264	14.7984	2.16e-40	4.32e-39	Up
HTR4	-3.89377	2.85875	-14.7962	2.21e-40	4.41e-39	Down
PEX11A	-1.22968	7.12771	-14.7956	2.22e-40	4.44e-39	Down
MXD1	-1.81458	10.2725	-14.7937	2.26e-40	4.52e-39	Down
GPR56	1.35814	12.1712	14.7889	2.37e-40	4.73e-39	Up
KRT9	-1.56708	0.620473	-14.7828	2.52e-40	5.02e-39	Down
NPTX1	-4.55394	3.65827	-14.7716	2.81e-40	5.6e-39	Down
NIT1	-0.8137	9.0056	-14.7629	3.06e-40	6.09e-39	Down
FABP6	4.94925	5.89674	14.7509	3.45e-40	6.86e-39	Up
EXOSC7	0.934273	9.3968	14.7422	3.76e-40	7.46e-39	Up
KIF1A	-4.23325	3.20209	-14.7384	3.9e-40	7.74e-39	Down
PBX4	1.91222	5.01868	14.7368	3.96e-40	7.86e-39	Up
LRP11	1.20365	10.4472	14.7332	4.11e-40	8.13e-39	Up
TMEM35	-3.86672	4.39673	-14.7284	4.3e-40	8.51e-39	Down
LOC643763	-3.02894	1.83862	-14.7254	4.44e-40	8.77e-39	Down
FMN2	-4.00213	2.45702	-14.72	4.68e-40	9.23e-39	Down
KIAA1524	1.45219	7.92492	14.7194	4.7e-40	9.28e-39	Up
HAPLN1	-2.98742	5.33874	-14.7163	4.85e-40	9.56e-39	Down
P2RX1	-2.92908	4.76319	-14.7141	4.96e-40	9.76e-39	Down
CHTF18	1.59386	8.83264	14.7125	5.03e-40	9.9e-39	Up
C16orf59	1.65224	7.06673	14.7028	5.54e-40	1.09e-38	Up
TMEM20	-1.43946	7.44323	-14.7026	5.55e-40	1.09e-38	Down
NCR2	-0.998584	0.317699	-14.7014	5.62e-40	1.1e-38	Down
LPHN3	-3.10158	4.47127	-14.7008	5.65e-40	1.11e-38	Down
FAM129A	-3.04696	8.03216	-14.6961	5.92e-40	1.16e-38	Down
VPS4B	-1.02557	10.3338	-14.6944	6.02e-40	1.18e-38	Down
MT2A	-2.61766	9.93868	-14.6928	6.11e-40	1.19e-38	Down
CENPA	1.49089	7.65625	14.6918	6.17e-40	1.2e-38	Up
CCBE1	-3.8948	2.95966	-14.6852	6.59e-40	1.28e-38	Down
SDPR	-2.93703	7.21724	-14.6832	6.72e-40	1.31e-38	Down
NPM1	1.15249	13.5425	14.6827	6.75e-40	1.31e-38	Up
STOX2	-2.40154	2.18827	-14.6804	6.91e-40	1.34e-38	Down
ZBTB9	0.861801	8.1652	14.6769	7.15e-40	1.39e-38	Up
CCT5	0.777893	12.5635	14.6726	7.46e-40	1.45e-38	Up
DSC2	-1.62449	10.9519	-14.6703	7.63e-40	1.48e-38	Down
ZNF146	0.799981	10.9099	14.669	7.73e-40	1.5e-38	Up
LOC339524	-2.72773	3.76777	-14.6678	7.82e-40	1.51e-38	Down
TNFRSF17	-4.32839	3.9969	-14.6677	7.83e-40	1.51e-38	Down
DPF3	-2.92919	4.2714	-14.6676	7.84e-40	1.51e-38	Down
MFSD11	-0.803426	8.76697	-14.6573	8.67e-40	1.67e-38	Down
ZNF692	1.55125	8.5342	14.6517	9.16e-40	1.77e-38	Up
SLC5A6	1.66774	10.8438	14.6388	1.04e-39	2e-38	Up
TRIM59	1.16844	7.72219	14.637	1.06e-39	2.04e-38	Up
LDB3	-3.90287	4.18478	-14.6368	1.06e-39	2.04e-38	Down
RNASEH2A	1.20988	9.41784	14.6294	1.14e-39	2.19e-38	Up
SQLE	1.76545	10.7518	14.6294	1.14e-39	2.19e-38	Up
C9orf79	-0.89415	0.248525	-14.6229	1.22e-39	2.33e-38	Down
CENPE	1.58497	8.39311	14.6163	1.3e-39	2.49e-38	Up
INA	-3.44391	2.66723	-14.6159	1.3e-39	2.49e-38	Down
ANO10	-1.1256	9.68994	-14.6156	1.31e-39	2.5e-38	Down
UBFD1	0.802656	10.3897	14.6146	1.32e-39	2.52e-38	Up
GPR3	2.18563	4.46308	14.6135	1.33e-39	2.55e-38	Up
DHX37	0.874098	9.68493	14.612	1.35e-39	2.58e-38	Up
MORN5	-3.40539	1.15747	-14.6076	1.41e-39	2.69e-38	Down
AQP7	-2.89118	4.61203	-14.607	1.42e-39	2.71e-38	Down
LTC4S	-2.3664	2.50041	-14.6049	1.45e-39	2.76e-38	Down
CD163L1	-3.49359	6.32924	-14.5984	1.55e-39	2.94e-38	Down
CKAP5	0.920081	11.4106	14.5943	1.61e-39	3.06e-38	Up
PFDN2	1.01956	9.91758	14.5941	1.61e-39	3.06e-38	Up
PKMYT1	1.65436	9.00968	14.5906	1.67e-39	3.17e-38	Up
RIC3	-3.10597	2.2662	-14.5865	1.74e-39	3.29e-38	Down
CNTN1	-4.02142	2.76247	-14.5855	1.76e-39	3.32e-38	Down
SSTR3	-1.71359	0.851669	-14.584	1.78e-39	3.37e-38	Down
SLC8A3	-2.11292	1.83968	-14.5805	1.84e-39	3.48e-38	Down
PHGR1	-3.0938	10.5698	-14.5782	1.89e-39	3.56e-38	Down
CCDC150	2.26876	4.94392	14.5772	1.91e-39	3.59e-38	Up
GNG2	-2.06585	7.60809	-14.5754	1.94e-39	3.65e-38	Down
C4orf19	-1.77329	8.98167	-14.5729	1.99e-39	3.74e-38	Down
PGA3	-1.98601	0.890177	-14.5719	2.01e-39	3.77e-38	Down
ADAT2	1.48149	8.14604	14.5695	2.06e-39	3.86e-38	Up
DGAT2	1.92866	9.13416	14.569	2.07e-39	3.87e-38	Up
CTPS	1.20321	9.68703	14.567	2.11e-39	3.95e-38	Up
AEN	1.21911	9.58545	14.5656	2.14e-39	4e-38	Up
NOTUM	6.43549	6.913	14.5603	2.25e-39	4.21e-38	Up
ADH1C	-5.84973	7.65845	-14.5509	2.47e-39	4.61e-38	Down
PPA1	1.11739	12.5489	14.546	2.59e-39	4.83e-38	Up
GPT2	1.60008	10.3517	14.5447	2.62e-39	4.89e-38	Up
CSRP1	-1.69985	12.3323	-14.5436	2.65e-39	4.94e-38	Down
TRPC7	-0.571903	0.144544	-14.5404	2.74e-39	5.09e-38	Down
SORD	1.46685	10.2687	14.5387	2.78e-39	5.18e-38	Up
EMILIN3	-2.37794	3.25274	-14.535	2.89e-39	5.36e-38	Down
DPT	-4.7109	6.54509	-14.5308	3.01e-39	5.58e-38	Down
ZNF200	0.868004	7.97438	14.5287	3.07e-39	5.69e-38	Up
EXOSC5	1.22256	9.33281	14.5255	3.17e-39	5.87e-38	Up
EPHA7	-4.08477	4.35403	-14.5215	3.29e-39	6.1e-38	Down
PRR19	1.28738	4.63089	14.5182	3.4e-39	6.3e-38	Up
TSPAN1	-2.7447	12.3942	-14.5178	3.42e-39	6.31e-38	Down
44628	-1.50481	7.60312	-14.5122	3.61e-39	6.66e-38	Down
PCDH10	-2.77909	1.63214	-14.5115	3.63e-39	6.7e-38	Down
TNS4	3.26701	10.5378	14.5013	4.02e-39	7.4e-38	Up
KCNA4	-0.893172	0.214094	-14.4997	4.08e-39	7.51e-38	Down
LOC100190940	6.14281	6.06764	14.4973	4.18e-39	7.69e-38	Up
SLC3A2	1.05744	11.7544	14.4971	4.18e-39	7.69e-38	Up
LILRB5	-3.49823	5.08114	-14.4923	4.39e-39	8.06e-38	Down
FANCA	1.46547	9.07292	14.4918	4.41e-39	8.09e-38	Up
MYBL2	1.92206	10.7221	14.49	4.49e-39	8.23e-38	Up
EDN3	-4.3199	6.44451	-14.483	4.81e-39	8.8e-38	Down
ACSM5	-2.66945	1.70481	-14.4826	4.83e-39	8.83e-38	Down
CD300LG	-2.95022	1.34378	-14.4796	4.97e-39	9.08e-38	Down
NR2C2AP	1.09148	9.055	14.4791	4.99e-39	9.12e-38	Up
CLDN5	-2.62461	6.87175	-14.4722	5.34e-39	9.75e-38	Down
DSCAML1	-3.26382	2.52653	-14.471	5.4e-39	9.85e-38	Down
C4orf43	0.833264	8.62812	14.469	5.51e-39	1e-37	Up
PVR	0.98543	10.7133	14.4668	5.63e-39	1.02e-37	Up
HEPACAM	-2.05703	0.700133	-14.4659	5.68e-39	1.03e-37	Down
SYNCRIP	0.759801	12.1547	14.4634	5.82e-39	1.06e-37	Up
ABCC8	-2.58598	1.61162	-14.4632	5.83e-39	1.06e-37	Down
DCLK1	-3.44568	4.48026	-14.461	5.96e-39	1.08e-37	Down
QTRTD1	0.788003	9.40017	14.4608	5.98e-39	1.08e-37	Up
PDE7B	-2.56232	4.64149	-14.451	6.58e-39	1.19e-37	Down
AGXT2L2	-1.18433	8.87589	-14.4487	6.72e-39	1.22e-37	Down
PCOLCE2	-4.56946	3.64343	-14.4447	6.99e-39	1.26e-37	Down
CCDC19	1.97441	3.52051	14.4446	7e-39	1.26e-37	Up
MELK	1.45025	9.03735	14.4311	7.99e-39	1.44e-37	Up
TARBP1	1.22624	9.61901	14.4297	8.1e-39	1.46e-37	Up
TH1L	1.33447	11.2505	14.4265	8.36e-39	1.51e-37	Up
FMO4	-1.87365	5.85551	-14.4203	8.88e-39	1.6e-37	Down
SFTA1P	-2.17404	1.17157	-14.4201	8.9e-39	1.6e-37	Down
ACVRL1	-1.91319	10.1198	-14.4186	9.03e-39	1.62e-37	Down
MRPL35	-0.744538	10.0963	-14.4172	9.16e-39	1.64e-37	Down
ARRDC4	-1.69093	9.30079	-14.4148	9.37e-39	1.68e-37	Down
SHOC2	-0.710859	9.83177	-14.4146	9.39e-39	1.68e-37	Down
FCRL4	-2.4766	1.38628	-14.4067	1.01e-38	1.82e-37	Down
YTHDF1	0.983151	10.8487	14.4056	1.03e-38	1.83e-37	Up
MOBKL2B	-1.63053	9.27685	-14.4038	1.04e-38	1.86e-37	Down
GGCT	1.2193	10.6819	14.4001	1.08e-38	1.93e-37	Up
ZDHHC9	1.26613	11.4091	14.3998	1.09e-38	1.94e-37	Up
KNTC1	1.20311	8.99688	14.3961	1.13e-38	2.01e-37	Up
CELF4	-2.4435	1.78326	-14.3936	1.15e-38	2.05e-37	Down
SPC25	1.31588	7.74698	14.3897	1.2e-38	2.13e-37	Up
TXNRD3IT1	1.20509	7.14457	14.3887	1.21e-38	2.15e-37	Up
CLEC10A	-3.82171	4.9763	-14.3879	1.22e-38	2.17e-37	Down
SLC25A32	1.03	9.40331	14.3857	1.25e-38	2.21e-37	Up
FAM162A	-1.1653	10.4476	-14.3855	1.25e-38	2.21e-37	Down
C2orf58	-2.01304	1.72645	-14.383	1.28e-38	2.27e-37	Down
FAM150B	-2.8892	2.73625	-14.3824	1.29e-38	2.28e-37	Down
ARL14	-2.47895	7.40077	-14.3815	1.3e-38	2.3e-37	Down
GPR180	1.05148	8.50589	14.3807	1.31e-38	2.31e-37	Up
CNTN4	-2.85583	5.2477	-14.3789	1.33e-38	2.35e-37	Down
KCTD9	-1.28023	9.12447	-14.3783	1.34e-38	2.36e-37	Down
ZNF74	1.07152	8.29666	14.3776	1.35e-38	2.38e-37	Up
MSX1	2.65928	6.12724	14.3753	1.38e-38	2.43e-37	Up
ITGA2	1.47099	10.6624	14.3725	1.42e-38	2.49e-37	Up
BEND5	-2.73461	3.08325	-14.3594	1.61e-38	2.83e-37	Down
NMB	1.50759	6.59302	14.3568	1.65e-38	2.9e-37	Up
CPNE5	-2.38189	6.43756	-14.3567	1.65e-38	2.9e-37	Down
NPRL3	0.95035	9.70059	14.3558	1.67e-38	2.93e-37	Up
FEZ2	-0.87774	9.32099	-14.3553	1.68e-38	2.94e-37	Down
MYC	1.76226	12.1726	14.342	1.91e-38	3.34e-37	Up
TMEM131	-0.875803	10.7396	-14.3388	1.97e-38	3.44e-37	Down
TMEM97	1.45556	10.3309	14.3383	1.98e-38	3.46e-37	Up
ACSBG1	-1.61445	2.68026	-14.3347	2.05e-38	3.58e-37	Down
SUV39H2	1.05501	7.99621	14.3306	2.14e-38	3.72e-37	Up
GNAO1	-3.52495	5.78744	-14.3247	2.26e-38	3.94e-37	Down
GDPD3	-2.63338	7.17869	-14.3202	2.36e-38	4.11e-37	Down
SLMO1	1.77096	5.51734	14.3164	2.45e-38	4.27e-37	Up
UBE2I	0.719557	11.2026	14.3134	2.53e-38	4.39e-37	Up
CLEC4G	-2.8229	1.5788	-14.3128	2.54e-38	4.41e-37	Down
CPNE8	-2.5011	6.55433	-14.3086	2.65e-38	4.59e-37	Down
CUX2	-2.04095	1.1347	-14.3044	2.76e-38	4.78e-37	Down
GART	0.936997	10.9099	14.3033	2.79e-38	4.83e-37	Up
FAM60A	1.16119	11.1895	14.2944	3.04e-38	5.26e-37	Up
RNF11	-0.944632	10.1727	-14.2895	3.19e-38	5.51e-37	Down
KRT17	4.73118	6.94665	14.2868	3.27e-38	5.66e-37	Up
C10orf76	-0.603247	9.33744	-14.2864	3.29e-38	5.67e-37	Down
ATP1B2	-2.52791	3.93709	-14.2853	3.32e-38	5.73e-37	Down
MARVELD3	-1.2039	9.27203	-14.281	3.46e-38	5.97e-37	Down
GPX3	-2.83117	8.90522	-14.2806	3.48e-38	5.99e-37	Down
PA2G4	0.888718	12.2405	14.2803	3.49e-38	6e-37	Up
C1QTNF2	-1.93991	4.44423	-14.2796	3.51e-38	6.04e-37	Down
SMPD4	0.70811	11.0001	14.2783	3.56e-38	6.11e-37	Up
MLXIPL	3.03778	8.86356	14.2722	3.78e-38	6.48e-37	Up
GPR112	-1.3036	0.280799	-14.2712	3.81e-38	6.54e-37	Down
OCEL1	-1.28916	7.72549	-14.2677	3.94e-38	6.76e-37	Down
NAT9	1.0483	9.27285	14.2674	3.96e-38	6.78e-37	Up
FGFRL1	1.6776	9.98789	14.261	4.21e-38	7.2e-37	Up
FAM63A	-1.15687	8.70129	-14.2597	4.26e-38	7.29e-37	Down
RGS13	-3.3759	2.54903	-14.2595	4.27e-38	7.3e-37	Down
KLRF1	-1.85713	1.42758	-14.2587	4.31e-38	7.35e-37	Down
PABPC1L	2.94654	7.85067	14.2572	4.37e-38	7.45e-37	Up
PDCD11	1.05638	10.5027	14.2384	5.25e-38	8.94e-37	Up
TKT	1.00712	12.9639	14.2344	5.46e-38	9.29e-37	Up
ATP5A1	-1.12654	13.1263	-14.2314	5.62e-38	9.56e-37	Down
GNG12	-1.11329	11.4796	-14.2281	5.8e-38	9.86e-37	Down
MGC42105	-1.83698	1.66865	-14.2261	5.92e-38	1.01e-36	Down
NOP56	1.36231	11.4984	14.2234	6.07e-38	1.03e-36	Up
IGFBP6	-2.55472	7.07074	-14.2211	6.21e-38	1.05e-36	Down
DNAJC28	-1.50198	3.69696	-14.2199	6.28e-38	1.06e-36	Down
KIAA0513	-2.19734	8.1669	-14.215	6.59e-38	1.12e-36	Down
NUP43	0.777602	9.58115	14.2147	6.61e-38	1.12e-36	Up
WDR66	2.48303	4.53623	14.2119	6.79e-38	1.15e-36	Up
PBLD	-2.35605	8.57618	-14.2082	7.04e-38	1.19e-36	Down
PQLC1	-1.15972	9.68738	-14.2073	7.1e-38	1.2e-36	Down
CLIC5	-2.19683	10.0019	-14.2069	7.13e-38	1.2e-36	Down
CENPI	1.73379	6.38014	14.1978	7.8e-38	1.31e-36	Up
CHMP1B	-1.00225	10.6522	-14.1974	7.82e-38	1.32e-36	Down
ACAT1	-1.41935	10.1452	-14.1898	8.43e-38	1.42e-36	Down
UGT1A10	-4.50581	7.28514	-14.1872	8.64e-38	1.45e-36	Down
ASAP3	-2.08192	7.82403	-14.1829	9.01e-38	1.51e-36	Down
PPP1R14A	-2.42232	6.03423	-14.1797	9.29e-38	1.56e-36	Down
BTD	-1.10426	8.21859	-14.1789	9.37e-38	1.57e-36	Down
NAA15	0.851665	10.285	14.1744	9.79e-38	1.64e-36	Up
RIT2	-0.663816	0.137598	-14.1727	9.95e-38	1.66e-36	Down
WNT3	2.14651	3.95325	14.17	1.02e-37	1.71e-36	Up
GEMIN5	0.875369	9.32997	14.1666	1.06e-37	1.76e-36	Up
ACACB	-1.98815	8.48	-14.1594	1.13e-37	1.89e-36	Down
RAN	0.898694	12.5621	14.1587	1.14e-37	1.9e-36	Up
STIP1	0.810255	11.846	14.1578	1.15e-37	1.92e-36	Up
DYRK2	-1.01899	10.1281	-14.1562	1.17e-37	1.95e-36	Down
IGJ	-5.73774	11.0126	-14.1557	1.17e-37	1.95e-36	Down
ASB7	-0.778622	8.57306	-14.1555	1.18e-37	1.95e-36	Down
C2orf7	-1.20173	8.47712	-14.1416	1.35e-37	2.24e-36	Down
RHEBL1	1.7987	4.79524	14.1318	1.48e-37	2.46e-36	Up
LAMA1	-3.17104	5.2276	-14.1297	1.51e-37	2.51e-36	Down
MMRN1	-4.24374	5.34295	-14.1204	1.66e-37	2.74e-36	Down
GLYATL3	-1.51762	0.445088	-14.1179	1.69e-37	2.81e-36	Down
TM6SF2	-3.1445	3.92118	-14.1179	1.7e-37	2.81e-36	Down
TMEM171	-2.66082	8.01341	-14.1162	1.72e-37	2.85e-36	Down
FAM54A	1.45533	7.22131	14.1145	1.75e-37	2.89e-36	Up
FIGNL1	1.17179	8.51314	14.1084	1.86e-37	3.07e-36	Up
NCAPH	1.30126	8.93046	14.1061	1.9e-37	3.13e-36	Up
PLCXD3	-3.45618	2.04417	-14.1039	1.94e-37	3.2e-36	Down
HEATR2	0.909811	10.3147	14.0995	2.03e-37	3.34e-36	Up
RCC2	0.901371	12.0332	14.098	2.06e-37	3.38e-36	Up
LOC645323	-1.90772	0.979072	-14.0976	2.06e-37	3.39e-36	Down
ZNF485	1.18387	6.28568	14.0876	2.28e-37	3.74e-36	Up
C1orf112	1.19951	7.71389	14.0849	2.34e-37	3.83e-36	Up
RCAN2	-2.10072	7.30875	-14.0828	2.38e-37	3.91e-36	Down
SLC9A1	-1.34639	10.5118	-14.0816	2.41e-37	3.95e-36	Down
ENOPH1	0.850862	10.0352	14.0814	2.42e-37	3.95e-36	Up
TLR3	-2.33905	7.00757	-14.0794	2.46e-37	4.03e-36	Down
ERCC6L	1.72979	7.37112	14.0771	2.52e-37	4.12e-36	Up
C16orf46	1.09087	4.98312	14.0735	2.61e-37	4.26e-36	Up
SLC5A11	-2.73653	1.57995	-14.0729	2.62e-37	4.28e-36	Down
WASL	-0.956609	10.9263	-14.0718	2.65e-37	4.32e-36	Down
SCN4B	-2.60466	5.08938	-14.0711	2.67e-37	4.35e-36	Down
ZSWIM6	-1.03879	8.54406	-14.0679	2.75e-37	4.48e-36	Down
C1QTNF7	-3.19697	4.29726	-14.0664	2.79e-37	4.55e-36	Down
CEACAM1	-2.19006	12.1659	-14.0528	3.19e-37	5.18e-36	Down
KCNK3	-3.42825	3.26462	-14.0527	3.19e-37	5.19e-36	Down
DBF4B	1.22516	7.4061	14.0514	3.23e-37	5.25e-36	Up
FCER2	-3.8413	2.28078	-14.0509	3.25e-37	5.27e-36	Down
GGTA1	-2.8537	5.2331	-14.0507	3.26e-37	5.28e-36	Down
PTGER4	-1.88144	8.83005	-14.0504	3.26e-37	5.29e-36	Down
NCAM1	-3.17322	6.0432	-14.0498	3.28e-37	5.31e-36	Down
PHF14	0.923288	9.89293	14.0497	3.29e-37	5.31e-36	Up
KIAA1045	-2.31356	1.72365	-14.0488	3.32e-37	5.35e-36	Down
DIRC3	-2.03527	1.40929	-14.0478	3.35e-37	5.4e-36	Down
PRMT3	1.1828	8.88738	14.0466	3.39e-37	5.46e-36	Up
MAPK3	-1.15577	11.2731	-14.0455	3.42e-37	5.52e-36	Down
MGLL	-1.39983	11.7183	-14.0447	3.45e-37	5.55e-36	Down
CCT2	0.883003	11.9904	14.0446	3.45e-37	5.56e-36	Up
SOS2	-0.974304	9.61247	-14.0443	3.46e-37	5.57e-36	Down
YEATS2	0.871297	9.91929	14.0434	3.49e-37	5.61e-36	Up
SLC35D1	-1.26057	10.4193	-14.0416	3.56e-37	5.71e-36	Down
C1orf201	-1.10476	7.60795	-14.0406	3.59e-37	5.76e-36	Down
RPP40	1.28622	7.2936	14.0403	3.6e-37	5.77e-36	Up
RGS9	-2.65135	3.67288	-14.0391	3.64e-37	5.83e-36	Down
LTV1	0.931473	9.56441	14.0336	3.84e-37	6.15e-36	Up
DDX21	1.21465	11.4682	14.0283	4.04e-37	6.47e-36	Up
UBAP2L	0.685806	11.5015	14.0249	4.18e-37	6.68e-36	Up
CCDC152	-2.772	5.33318	-14.0226	4.27e-37	6.82e-36	Down
NUFIP1	1.37087	8.2445	14.0214	4.32e-37	6.9e-36	Up
RPL7L1	0.755473	10.0341	14.0208	4.35e-37	6.93e-36	Up
SGOL1	1.41262	6.98806	14.02	4.38e-37	6.98e-36	Up
IL10RB	-1.09565	10.2593	-14.0183	4.46e-37	7.09e-36	Down
ULBP2	3.19938	4.29279	14.0144	4.63e-37	7.36e-36	Up
ADCY5	-3.88034	4.93817	-14.0128	4.7e-37	7.46e-36	Down
CDC6	1.65446	9.36678	14.0125	4.71e-37	7.48e-36	Up
SYT4	-3.46515	1.92006	-14.0055	5.04e-37	8e-36	Down
CCDC13	-1.69366	2.4307	-14.0049	5.07e-37	8.04e-36	Down
NR1H4	-4.40858	2.95215	-13.9959	5.53e-37	8.77e-36	Down
CDC42SE2	-0.878792	11.1219	-13.9952	5.58e-37	8.83e-36	Down
RBM20	-2.53321	3.11632	-13.9926	5.72e-37	9.04e-36	Down
PAG1	-1.84092	9.06743	-13.9887	5.94e-37	9.38e-36	Down
UBE2CBP	1.15233	6.48251	13.9869	6.04e-37	9.54e-36	Up
TCF3	0.897909	11.1773	13.9865	6.06e-37	9.57e-36	Up
NAA38	0.910853	9.11314	13.9796	6.48e-37	1.02e-35	Up
ABCA6	-3.4966	3.56869	-13.9787	6.54e-37	1.03e-35	Down
PSMD14	0.834623	10.6631	13.9751	6.77e-37	1.07e-35	Up
C7orf27	0.959421	10.4482	13.975	6.78e-37	1.07e-35	Up
B3GNT7	-4.2257	8.6413	-13.9748	6.79e-37	1.07e-35	Down
RAD54L	1.59027	8.12459	13.9741	6.84e-37	1.07e-35	Up
FAM189A2	-3.11589	3.42155	-13.9679	7.26e-37	1.14e-35	Down
PIK3C2G	-1.4409	0.403147	-13.9608	7.78e-37	1.22e-35	Down
IFRD2	0.93608	10.6453	13.9564	8.12e-37	1.27e-35	Up
SLC23A1	-3.27238	4.33279	-13.9529	8.4e-37	1.31e-35	Down
POLQ	1.5961	7.71262	13.9462	8.96e-37	1.4e-35	Up
WDR7	-1.20216	8.03555	-13.9425	9.28e-37	1.45e-35	Down
HRNBP3	-3.75485	2.79041	-13.9381	9.68e-37	1.51e-35	Down
PSEN1	-0.764143	11.0297	-13.9361	9.88e-37	1.54e-35	Down
ULBP3	1.85403	5.28522	13.9309	1.04e-36	1.62e-35	Up
UGGT2	1.21332	8.81318	13.9257	1.09e-36	1.7e-35	Up
PPM1G	0.694054	11.8004	13.9237	1.11e-36	1.73e-35	Up
RAB1B	-0.642041	12.1046	-13.9229	1.12e-36	1.75e-35	Down
C16orf55	1.16601	7.53563	13.9225	1.13e-36	1.75e-35	Up
RXRA	-0.996099	10.662	-13.9148	1.21e-36	1.88e-35	Down
ZCCHC7	0.855221	9.01724	13.9106	1.26e-36	1.96e-35	Up
FCER1A	-3.16422	3.22539	-13.9089	1.28e-36	1.99e-35	Down
CPSF6	0.511633	10.7719	13.9086	1.29e-36	2e-35	Up
DTL	1.35159	8.7565	13.9073	1.3e-36	2.02e-35	Up
TMEM59	-1.0576	12.5494	-13.9037	1.35e-36	2.09e-35	Down
RBPMS2	-3.34501	5.12383	-13.901	1.39e-36	2.15e-35	Down
VAPA	-0.963452	11.1245	-13.8993	1.41e-36	2.18e-35	Down
CDH18	-0.703588	0.156572	-13.8976	1.43e-36	2.21e-35	Down
CTU2	1.01086	8.43896	13.8945	1.48e-36	2.28e-35	Up
MAPK10	-2.63854	4.27042	-13.8915	1.52e-36	2.34e-35	Down
MRGPRX2	-1.04866	0.235044	-13.8905	1.53e-36	2.37e-35	Down
C15orf48	-2.92282	10.9102	-13.8888	1.56e-36	2.4e-35	Down
C14orf43	-1.12588	9.64264	-13.8885	1.56e-36	2.41e-35	Down
ATP13A4	-3.52563	3.20016	-13.8861	1.6e-36	2.46e-35	Down
KIAA1683	-2.32051	4.95572	-13.8849	1.62e-36	2.49e-35	Down
SLC7A6	1.07895	10.3944	13.8831	1.65e-36	2.53e-35	Up
C7	-4.80557	6.55951	-13.8812	1.68e-36	2.57e-35	Down
NAP1L1	1.06571	12.5772	13.8801	1.7e-36	2.6e-35	Up
NOP16	1.13992	8.95226	13.8786	1.72e-36	2.64e-35	Up
OR2L13	-0.821229	0.20878	-13.878	1.73e-36	2.65e-35	Down
PKP4	0.776699	10.9009	13.8758	1.77e-36	2.71e-35	Up
LONRF2	-4.1251	3.02076	-13.8688	1.89e-36	2.89e-35	Down
HAGHL	2.86087	6.15218	13.8684	1.9e-36	2.9e-35	Up
HOXD1	-3.03377	4.3356	-13.8627	2.01e-36	3.06e-35	Down
STC2	3.50871	8.25767	13.861	2.04e-36	3.11e-35	Up
KCNG3	-2.49139	2.05555	-13.8596	2.07e-36	3.15e-35	Down
CARD14	2.33226	5.76587	13.8596	2.07e-36	3.15e-35	Up
MSX2	3.92429	6.78798	13.8589	2.08e-36	3.17e-35	Up
CEND1	-2.07462	2.49081	-13.8551	2.16e-36	3.28e-35	Down
CCT4	0.830726	12.1392	13.8542	2.18e-36	3.31e-35	Up
WDR17	-2.80654	2.06712	-13.8524	2.22e-36	3.36e-35	Down
TGS1	1.007	9.53615	13.8407	2.48e-36	3.76e-35	Up
CENPP	1.29519	6.39744	13.8388	2.53e-36	3.83e-35	Up
SYP	-2.24183	5.63786	-13.8353	2.61e-36	3.96e-35	Down
ZNF263	0.706838	9.50898	13.8351	2.62e-36	3.96e-35	Up
44622	-1.15491	8.50599	-13.8338	2.65e-36	4.01e-35	Down
AHCY	1.33937	12.9475	13.8333	2.67e-36	4.03e-35	Up
FAM126B	-0.920321	8.69364	-13.828	2.8e-36	4.24e-35	Down
ZBTB16	-3.58702	2.8019	-13.8257	2.87e-36	4.33e-35	Down
CYP4B1	-2.86146	2.07671	-13.8142	3.2e-36	4.83e-35	Down
RNF183	2.7825	5.3549	13.8099	3.34e-36	5.03e-35	Up
PLOD3	1.09589	11.7829	13.8092	3.36e-36	5.06e-35	Up
LIMK1	0.984063	9.86368	13.8073	3.42e-36	5.15e-35	Up
EPM2A	-1.35545	6.2748	-13.8055	3.48e-36	5.24e-35	Down
TCF21	-2.57568	6.87097	-13.8041	3.53e-36	5.31e-35	Down
ASB5	-3.63369	1.44376	-13.797	3.78e-36	5.68e-35	Down
LOC646627	-5.2302	6.28725	-13.7959	3.82e-36	5.73e-35	Down
PPP1CB	-0.704748	12.2963	-13.7944	3.88e-36	5.81e-35	Down
NLE1	1.16669	9.08726	13.7921	3.96e-36	5.94e-35	Up
LPP	-1.58025	8.26645	-13.7856	4.22e-36	6.32e-35	Down
CES2	-2.24425	12.0882	-13.7825	4.35e-36	6.5e-35	Down
CTHRC1	3.28086	8.36269	13.7824	4.35e-36	6.51e-35	Up
LIMA1	-1.43168	11.7578	-13.7821	4.37e-36	6.52e-35	Down
KCNS2	-1.67343	0.923747	-13.7819	4.37e-36	6.53e-35	Down
MYLK	-3.01324	10.8351	-13.7772	4.58e-36	6.83e-35	Down
SIGLEC6	-2.60702	2.06052	-13.776	4.63e-36	6.9e-35	Down
GPER	-2.88082	5.23843	-13.7741	4.72e-36	7.03e-35	Down
SLC4A11	3.62713	5.98445	13.7733	4.75e-36	7.07e-35	Up
MRPS17	1.05394	8.54681	13.7684	4.98e-36	7.41e-35	Up
SIGMAR1	0.98344	11.292	13.7683	4.98e-36	7.41e-35	Up
GRIA1	-2.17925	1.32094	-13.7679	5e-36	7.43e-35	Down
KIAA1370	-1.23284	8.27632	-13.7647	5.16e-36	7.66e-35	Down
INCA1	-1.38412	3.7666	-13.7627	5.26e-36	7.81e-35	Down
FAM123A	-0.932037	0.226555	-13.7595	5.42e-36	8.04e-35	Down
SMYD2	0.854333	9.49865	13.7528	5.79e-36	8.57e-35	Up
RGS16	2.15115	8.21669	13.7507	5.9e-36	8.74e-35	Up
KRT25	-0.653372	0.113466	-13.7482	6.05e-36	8.95e-35	Down
PAPSS2	-2.1939	10.6593	-13.7448	6.25e-36	9.24e-35	Down
SRM	1.0852	10.3577	13.7368	6.75e-36	9.96e-35	Up
NUPL1	0.996707	10.4868	13.7257	7.51e-36	1.11e-34	Up
CAMK2G	-0.85503	9.99753	-13.7249	7.57e-36	1.12e-34	Down
CLMN	-1.34974	10.1064	-13.7223	7.76e-36	1.14e-34	Down
ATG4D	-0.947258	9.0558	-13.7219	7.79e-36	1.15e-34	Down
ITM2A	-2.61732	6.88135	-13.7218	7.8e-36	1.15e-34	Down
CCT7	0.766179	12.6547	13.7185	8.05e-36	1.18e-34	Up
GRINA	1.18023	11.8878	13.7144	8.37e-36	1.23e-34	Up
VSNL1	2.66982	8.40065	13.7136	8.43e-36	1.24e-34	Up
GALNTL1	-3.28628	3.64697	-13.713	8.49e-36	1.25e-34	Down
TADA2B	-0.700612	9.3393	-13.7097	8.75e-36	1.28e-34	Down
DHRS9	-4.9624	7.04907	-13.7096	8.77e-36	1.29e-34	Down
WDR5	0.797081	10.4493	13.7071	8.98e-36	1.32e-34	Up
PGM5P2	-2.38373	2.03671	-13.6993	9.68e-36	1.42e-34	Down
C20orf199	1.65529	11.1164	13.6965	9.94e-36	1.45e-34	Up
NEUROD1	-3.90824	1.75289	-13.694	1.02e-35	1.49e-34	Down
KCNJ14	1.64346	5.11189	13.6935	1.02e-35	1.49e-34	Up
MGC14436	2.75286	3.32234	13.6929	1.03e-35	1.5e-34	Up
SESN2	-1.18379	8.85693	-13.6915	1.04e-35	1.52e-34	Down
CD1D	-2.14538	5.35579	-13.6909	1.05e-35	1.53e-34	Down
ZNF598	0.831911	10.3464	13.6862	1.1e-35	1.6e-34	Up
FOXF2	-2.48798	6.63039	-13.6854	1.11e-35	1.61e-34	Down
PRKCB	-3.06756	6.36577	-13.6798	1.17e-35	1.7e-34	Down
KIAA0406	1.13333	9.68243	13.6731	1.25e-35	1.81e-34	Up
TTK	1.35838	8.59768	13.6682	1.3e-35	1.89e-34	Up
ZADH2	-0.951939	9.60666	-13.6622	1.38e-35	2.01e-34	Down
UBQLN4	0.756877	10.6038	13.6612	1.4e-35	2.02e-34	Up
SFTA2	4.08753	3.78356	13.6606	1.4e-35	2.03e-34	Up
TAB2	-0.730815	10.6157	-13.6603	1.41e-35	2.04e-34	Down
STX1A	1.67014	7.21367	13.6548	1.48e-35	2.15e-34	Up
GAP43	-3.59145	3.30584	-13.6494	1.56e-35	2.26e-34	Down
POU5F1B	3.32572	6.26498	13.6452	1.63e-35	2.35e-34	Up
TRIM40	-3.21777	4.42716	-13.6402	1.71e-35	2.46e-34	Down
CD44	1.19733	12.5693	13.6349	1.8e-35	2.59e-34	Up
SYNPO	-1.66875	10.3869	-13.6346	1.8e-35	2.6e-34	Down
DSCR3	-0.826442	9.99847	-13.633	1.83e-35	2.64e-34	Down
PRPF40A	0.652198	11.3606	13.6316	1.85e-35	2.67e-34	Up
CHAF1B	1.27914	7.94351	13.6315	1.86e-35	2.67e-34	Up
CD36	-3.34871	6.83119	-13.624	1.99e-35	2.87e-34	Down
OLA1	0.938537	11.2038	13.6216	2.04e-35	2.93e-34	Up
SNORA8	1.28563	8.45731	13.6208	2.06e-35	2.95e-34	Up
PTH1R	-2.69372	2.61297	-13.6168	2.14e-35	3.06e-34	Down
CLDN7	-1.22918	12.6768	-13.616	2.15e-35	3.09e-34	Down
RP9P	1.06867	7.712	13.6122	2.23e-35	3.2e-34	Up
GNL2	0.736979	10.2933	13.6093	2.3e-35	3.29e-34	Up
PLS1	-1.35443	11.9648	-13.6065	2.36e-35	3.37e-34	Down
MAGI3	-1.08847	8.97055	-13.6047	2.4e-35	3.43e-34	Down
ARRB1	-1.20915	9.11439	-13.6039	2.42e-35	3.45e-34	Down
RBM19	0.78144	9.33518	13.6034	2.43e-35	3.47e-34	Up
PEG3	-2.82275	4.58938	-13.6013	2.48e-35	3.54e-34	Down
KIAA1161	-1.35436	9.79255	-13.5988	2.54e-35	3.62e-34	Down
TMEM179	-1.1864	0.376186	-13.5977	2.57e-35	3.66e-34	Down
GFRA1	-3.68761	5.40433	-13.5958	2.61e-35	3.72e-34	Down
YARS	0.919853	11.2205	13.5958	2.61e-35	3.72e-34	Up
PDE9A	-2.8782	8.44948	-13.5955	2.62e-35	3.72e-34	Down
CASP2	0.7487	10.2993	13.5862	2.86e-35	4.07e-34	Up
C14orf139	-1.97664	5.30407	-13.5817	2.99e-35	4.25e-34	Down
SLC22A23	-1.56133	9.97272	-13.5783	3.09e-35	4.38e-34	Down
HEPN1	-1.73049	0.63296	-13.5738	3.22e-35	4.57e-34	Down
BOP1	1.7352	9.15718	13.5707	3.32e-35	4.71e-34	Up
TCERG1	0.747176	10.0834	13.5695	3.36e-35	4.76e-34	Up
SLC26A3	-6.95612	9.83392	-13.5668	3.45e-35	4.88e-34	Down
DCAF11	-0.714821	10.8728	-13.5656	3.49e-35	4.93e-34	Down
DISP2	-2.32447	6.25239	-13.5644	3.53e-35	4.99e-34	Down
GRIK5	-3.21397	3.51246	-13.5636	3.56e-35	5.02e-34	Down
UTP20	1.06952	9.61566	13.5606	3.66e-35	5.16e-34	Up
CGRRF1	-1.15445	7.02792	-13.5566	3.8e-35	5.36e-34	Down
CHP2	-5.50721	7.92329	-13.5539	3.9e-35	5.5e-34	Down
BTNL8	-4.18196	6.84964	-13.5503	4.04e-35	5.69e-34	Down
HBB	-3.59903	7.39022	-13.5485	4.11e-35	5.78e-34	Down
ALKBH2	1.09083	8.15485	13.5478	4.14e-35	5.82e-34	Up
PDZRN4	-4.05502	3.46023	-13.546	4.21e-35	5.91e-34	Down
DDX18	0.73036	11.2451	13.5434	4.31e-35	6.06e-34	Up
LGI4	-2.70883	5.82076	-13.5415	4.39e-35	6.16e-34	Down
C8orf46	-2.03084	1.30033	-13.5414	4.4e-35	6.17e-34	Down
C5orf30	-1.36738	9.18426	-13.5356	4.65e-35	6.51e-34	Down
FOLR2	-3.23195	6.15061	-13.525	5.15e-35	7.21e-34	Down
MIR17HG	2.31213	6.27606	13.5244	5.17e-35	7.24e-34	Up
PLAC8	-3.9593	8.92141	-13.52	5.39e-35	7.54e-34	Down
OAF	-1.02471	10.6626	-13.5173	5.54e-35	7.74e-34	Down
PMS1	0.804599	8.17056	13.5172	5.54e-35	7.74e-34	Up
ZNF695	2.00905	5.46553	13.5108	5.89e-35	8.22e-34	Up
C6orf105	-4.42935	6.95533	-13.5106	5.9e-35	8.24e-34	Down
RPN2	0.967232	13.349	13.5052	6.21e-35	8.66e-34	Up
TGDS	1.15019	8.61992	13.5049	6.23e-35	8.68e-34	Up
CDCA7	1.61228	11.337	13.4979	6.67e-35	9.28e-34	Up
TUBB4	-1.48273	6.01049	-13.4965	6.75e-35	9.39e-34	Down
DUS4L	1.07305	7.32293	13.495	6.85e-35	9.52e-34	Up
TCN2	-1.90895	8.66949	-13.4944	6.89e-35	9.57e-34	Down
CCNDBP1	-1.00026	9.52101	-13.4854	7.51e-35	1.04e-33	Down
CA14	-2.14576	2.45454	-13.4845	7.57e-35	1.05e-33	Down
SCN3A	-2.60059	3.35626	-13.4826	7.71e-35	1.07e-33	Down
C8orf30A	1.21938	9.81159	13.4795	7.94e-35	1.1e-33	Up
PSPH	1.35631	8.73389	13.4788	7.99e-35	1.11e-33	Up
DONSON	0.997996	7.96266	13.4753	8.27e-35	1.14e-33	Up
CENPH	1.28681	8.09159	13.4748	8.31e-35	1.15e-33	Up
PLK1	1.31109	10.0772	13.4704	8.66e-35	1.2e-33	Up
CEACAM7	-5.7461	10.2967	-13.4704	8.67e-35	1.2e-33	Down
DIRAS2	-2.36458	1.58997	-13.4703	8.67e-35	1.2e-33	Down
RLIM	0.816926	10.2375	13.4664	9e-35	1.24e-33	Up
URB1	1.0566	10.0428	13.4646	9.15e-35	1.26e-33	Up
MCM2	1.11921	10.6819	13.46	9.57e-35	1.32e-33	Up
TMEM90A	-1.89769	1.20698	-13.4589	9.67e-35	1.33e-33	Down
CAPN5	-1.51491	11.6421	-13.4567	9.88e-35	1.36e-33	Down
ZMIZ2	0.965115	11.6333	13.4494	1.06e-34	1.45e-33	Up
CHST8	-1.856	0.945225	-13.4492	1.06e-34	1.46e-33	Down
MND1	1.51333	6.78622	13.4439	1.12e-34	1.53e-33	Up
EAPP	-0.896456	9.5636	-13.442	1.14e-34	1.56e-33	Down
PLEKHB2	-0.753962	11.7516	-13.4397	1.16e-34	1.59e-33	Down
BRCA1	1.28168	8.99539	13.4391	1.17e-34	1.6e-33	Up
PDE5A	-2.01821	8.7413	-13.438	1.18e-34	1.61e-33	Down
BMS1	0.719636	10.4471	13.4378	1.18e-34	1.62e-33	Up
SLMAP	-1.00015	10.3226	-13.4341	1.23e-34	1.67e-33	Down
MAOA	-2.34519	11.1274	-13.4332	1.24e-34	1.69e-33	Down
GALNT12	-1.54031	10.1691	-13.4325	1.24e-34	1.7e-33	Down
TRIM3	-1.00799	7.94989	-13.427	1.31e-34	1.79e-33	Down
NTRK3	-2.65745	2.17902	-13.4261	1.32e-34	1.8e-33	Down
SCGB2A1	-3.63007	2.81413	-13.4083	1.57e-34	2.13e-33	Down
SR140	0.782389	10.9844	13.4074	1.58e-34	2.15e-33	Up
TNFSF10	-1.42491	10.4553	-13.4046	1.62e-34	2.21e-33	Down
TIMELESS	1.07638	9.93774	13.4032	1.64e-34	2.24e-33	Up
NCAPG	1.27984	9.04532	13.4018	1.67e-34	2.27e-33	Up
RNASEL	-1.26935	8.10884	-13.4008	1.68e-34	2.28e-33	Down
RBKS	-1.34333	6.29116	-13.3971	1.74e-34	2.36e-33	Down
LRMP	-3.17608	5.34593	-13.3855	1.95e-34	2.64e-33	Down
C14orf79	1.19862	7.1972	13.3793	2.06e-34	2.8e-33	Up
MYH11	-4.53526	11.5363	-13.3774	2.1e-34	2.85e-33	Down
BUB1B	1.35543	9.11218	13.3761	2.13e-34	2.88e-33	Up
SLC35F1	-2.27468	3.33069	-13.3744	2.16e-34	2.93e-33	Down
EHMT2	0.820375	10.6907	13.3719	2.22e-34	2.99e-33	Up
ATR	0.930922	9.34049	13.368	2.3e-34	3.1e-33	Up
KIF5A	-3.30155	3.02811	-13.3678	2.3e-34	3.11e-33	Down
CDCA3	1.40437	8.49047	13.3582	2.52e-34	3.4e-33	Up
HNRNPU	0.567376	13.2863	13.3502	2.72e-34	3.67e-33	Up
SIDT2	-1.07525	9.62347	-13.3441	2.89e-34	3.89e-33	Down
CCDC78	3.05108	4.68829	13.3424	2.93e-34	3.95e-33	Up
ABCC1	1.09714	10.6865	13.3402	3e-34	4.03e-33	Up
SYNM	-4.10569	8.45338	-13.34	3e-34	4.03e-33	Down
PLSCR4	-1.62834	8.36629	-13.3376	3.07e-34	4.12e-33	Down
TACR2	-3.65003	5.32662	-13.3313	3.26e-34	4.38e-33	Down
CASQ2	-4.94591	3.72754	-13.3289	3.34e-34	4.48e-33	Down
ACD	0.907832	8.81741	13.3257	3.44e-34	4.61e-33	Up
SEMA6A	-2.90477	8.58861	-13.3238	3.5e-34	4.69e-33	Down
GRIA2	-1.28299	0.535958	-13.3171	3.73e-34	4.99e-33	Down
STAP1	-2.87184	2.41124	-13.3154	3.79e-34	5.07e-33	Down
GDPD5	2.39905	8.72975	13.3148	3.81e-34	5.1e-33	Up
HRCT1	-2.65014	6.68128	-13.3123	3.9e-34	5.22e-33	Down
C15orf42	1.61928	7.8519	13.3118	3.92e-34	5.24e-33	Up
CNTN3	-3.7692	3.86465	-13.3112	3.95e-34	5.27e-33	Down
CHD7	1.1944	10.2151	13.3105	3.97e-34	5.3e-33	Up
PTGDR	-3.88596	4.28338	-13.3091	4.02e-34	5.36e-33	Down
C10orf105	-2.00939	1.99842	-13.3088	4.04e-34	5.38e-33	Down
TMEM54	-1.4778	11.8445	-13.3073	4.09e-34	5.45e-33	Down
C9orf117	1.49323	3.16245	13.3011	4.34e-34	5.78e-33	Up
AMN	-2.67483	8.67852	-13.296	4.56e-34	6.06e-33	Down
TXNDC11	-0.754403	10.2032	-13.2944	4.63e-34	6.15e-33	Down
NUP37	0.883264	9.19896	13.2937	4.66e-34	6.19e-33	Up
C3orf31	0.910897	7.69801	13.2929	4.69e-34	6.23e-33	Up
CA9	5.0682	7.749	13.2912	4.77e-34	6.33e-33	Up
F2RL1	-1.28794	10.9663	-13.2908	4.79e-34	6.34e-33	Down
NUTF2	0.856367	11.0895	13.289	4.87e-34	6.45e-33	Up
CFL2	-2.11081	7.80214	-13.2874	4.94e-34	6.55e-33	Down
SFPQ	0.610131	12.353	13.2835	5.13e-34	6.79e-33	Up
SNCG	-2.51185	4.8163	-13.2827	5.17e-34	6.83e-33	Down
CHEK1	1.11377	8.59922	13.2807	5.27e-34	6.96e-33	Up
PSKH1	-0.769951	9.69822	-13.2793	5.34e-34	7.05e-33	Down
ZNF132	-1.37637	4.87035	-13.275	5.57e-34	7.34e-33	Down
RCAN1	-1.28493	9.5883	-13.2708	5.79e-34	7.63e-33	Down
LUZP2	-2.85956	3.17184	-13.2672	5.99e-34	7.89e-33	Down
LGR4	-1.28771	10.5966	-13.2627	6.25e-34	8.23e-33	Down
CHL1	-3.32923	5.4262	-13.2552	6.71e-34	8.83e-33	Down
TBC1D10A	-0.977457	8.60901	-13.2434	7.51e-34	9.87e-33	Down
FAM46C	-2.4469	8.68394	-13.2407	7.7e-34	1.01e-32	Down
CFP	-2.38034	4.72337	-13.2395	7.79e-34	1.02e-32	Down
PTP4A1	-1.10464	12.0403	-13.2387	7.85e-34	1.03e-32	Down
LAS1L	1.05053	10.1562	13.2382	7.89e-34	1.03e-32	Up
UBE2T	1.37253	8.75272	13.236	8.05e-34	1.06e-32	Up
SLC41A2	-1.7086	8.14453	-13.2348	8.14e-34	1.07e-32	Down
TWISTNB	0.843118	9.37228	13.2334	8.26e-34	1.08e-32	Up
SCUBE1	-2.86835	4.66795	-13.227	8.77e-34	1.15e-32	Down
ZNF676	-1.65819	0.87017	-13.2252	8.92e-34	1.17e-32	Down
TUBAL3	-3.16567	6.38799	-13.2246	8.97e-34	1.17e-32	Down
MFN2	-0.803274	11.2337	-13.2215	9.24e-34	1.21e-32	Down
TP53I3	-1.20497	9.21094	-13.219	9.46e-34	1.23e-32	Down
RNPS1	0.654772	11.7537	13.2186	9.5e-34	1.24e-32	Up
IPO4	1.12939	10.3854	13.2168	9.66e-34	1.26e-32	Up
SLC6A15	-2.61128	1.24025	-13.2132	9.99e-34	1.3e-32	Down
GHITM	-0.805759	12.4315	-13.2131	1e-33	1.3e-32	Down
FAM70A	-2.83368	3.81173	-13.211	1.02e-33	1.33e-32	Down
DVWA	1.58445	1.65797	13.2099	1.03e-33	1.34e-32	Up
USP36	0.883616	10.3661	13.2084	1.05e-33	1.36e-32	Up
TMEM185B	0.845566	9.03783	13.2026	1.1e-33	1.43e-32	Up
MRPL3	0.767863	11.197	13.1963	1.17e-33	1.52e-32	Up
STK17B	-1.15988	9.57746	-13.1956	1.18e-33	1.53e-32	Down
HSPH1	1.6604	11.8757	13.1913	1.23e-33	1.59e-32	Up
TCEAL2	-3.76956	2.69508	-13.1903	1.24e-33	1.61e-32	Down
ADRB3	-2.16076	1.12715	-13.1771	1.41e-33	1.82e-32	Down
LOC283856	-1.50016	0.810406	-13.1765	1.41e-33	1.83e-32	Down
RICH2	-2.59488	8.27384	-13.175	1.43e-33	1.85e-32	Down
MAD2L1	1.37493	9.61862	13.175	1.43e-33	1.85e-32	Up
INTS7	0.805692	9.14404	13.1748	1.44e-33	1.86e-32	Up
ZNF835	-2.04561	1.81765	-13.1747	1.44e-33	1.86e-32	Down
MARCKS	-1.06226	11.8528	-13.1718	1.48e-33	1.91e-32	Down
SCUBE2	-3.04973	5.97996	-13.1653	1.57e-33	2.03e-32	Down
LOC100128164	-1.3469	0.831401	-13.1627	1.61e-33	2.08e-32	Down
ADRB2	-2.42972	3.68715	-13.1603	1.65e-33	2.12e-32	Down
PRRT1	-1.73066	4.46634	-13.1592	1.67e-33	2.14e-32	Down
GPR108	-0.777821	10.1038	-13.1531	1.76e-33	2.27e-32	Down
PPIL1	1.00577	9.53732	13.1504	1.81e-33	2.32e-32	Up
DCTN2	-0.551067	11.1816	-13.143	1.94e-33	2.49e-32	Down
KRT23	5.87782	7.95718	13.143	1.94e-33	2.49e-32	Up
TRMT11	0.925476	8.26542	13.1378	2.04e-33	2.62e-32	Up
LMNB2	1.07995	11.7019	13.133	2.13e-33	2.73e-32	Up
ACAA1	-1.00967	10.3585	-13.1325	2.14e-33	2.74e-32	Down
NEU4	-3.2392	6.75176	-13.1286	2.22e-33	2.85e-32	Down
POLR1E	0.866572	9.01789	13.1279	2.24e-33	2.86e-32	Up
TGIF1	1.04629	10.7307	13.1274	2.25e-33	2.87e-32	Up
RPL10L	-2.58319	1.94256	-13.1245	2.31e-33	2.95e-32	Down
MSTO1	0.882202	8.83869	13.1231	2.34e-33	2.99e-32	Up
SDHA	-0.922366	11.7258	-13.1223	2.36e-33	3.01e-32	Down
PAK1IP1	0.948165	8.92887	13.1205	2.4e-33	3.06e-32	Up
NUP205	0.83908	10.6385	13.1198	2.42e-33	3.08e-32	Up
ALG3	0.815295	10.4136	13.1174	2.47e-33	3.15e-32	Up
DMXL1	-0.888833	8.90825	-13.1149	2.53e-33	3.22e-32	Down
EXOSC3	0.867865	8.78847	13.1134	2.57e-33	3.26e-32	Up
SYNPO2	-3.74912	9.17175	-13.1054	2.77e-33	3.52e-32	Down
FAM21C	-0.789569	10.2948	-13.102	2.86e-33	3.63e-32	Down
ST7	0.680905	9.04457	13.0999	2.92e-33	3.7e-32	Up
CDCA4	1.17466	8.89145	13.0998	2.92e-33	3.71e-32	Up
HMX2	-1.94208	0.87461	-13.0942	3.08e-33	3.9e-32	Down
LMOD1	-3.48772	8.62177	-13.0937	3.09e-33	3.92e-32	Down
PLCD3	-1.65285	10.8964	-13.0891	3.23e-33	4.09e-32	Down
JAM2	-2.90579	5.32438	-13.0887	3.24e-33	4.1e-32	Down
SLCO2A1	-2.27543	8.81876	-13.086	3.33e-33	4.21e-32	Down
RACGAP1	1.02872	10.2583	13.0837	3.4e-33	4.29e-32	Up
PTPN12	0.827176	10.6289	13.0833	3.41e-33	4.31e-32	Up
RAB4B	-0.998595	8.77169	-13.0832	3.41e-33	4.31e-32	Down
FNBP1	-1.83496	9.50941	-13.0823	3.44e-33	4.35e-32	Down
IDH3A	-0.917342	10.5578	-13.0819	3.46e-33	4.36e-32	Down
PPP1R12B	-2.31485	10.1609	-13.0799	3.52e-33	4.44e-32	Down
LIPC	-3.2091	2.42825	-13.0782	3.58e-33	4.51e-32	Down
SLC2A4	-2.46787	5.92473	-13.0777	3.59e-33	4.52e-32	Down
SYN2	-2.92557	2.51099	-13.0777	3.6e-33	4.52e-32	Down
FMO5	-2.29222	8.0992	-13.072	3.79e-33	4.77e-32	Down
SIGLEC11	-2.22807	2.44634	-13.0693	3.89e-33	4.89e-32	Down
S100B	-2.72623	5.27719	-13.0692	3.9e-33	4.89e-32	Down
BAD	-0.903572	9.44208	-13.0683	3.93e-33	4.93e-32	Down
CDK5RAP1	1.00011	9.43188	13.0541	4.49e-33	5.63e-32	Up
HHLA2	-3.33966	9.04296	-13.0451	4.89e-33	6.13e-32	Down
TMEM170A	-0.778772	9.61411	-13.0423	5.02e-33	6.28e-32	Down
SLC18A3	-2.30938	0.992445	-13.0404	5.11e-33	6.4e-32	Down
NUP85	0.730841	9.74139	13.04	5.13e-33	6.42e-32	Up
FAP	3.55773	7.34838	13.0363	5.31e-33	6.64e-32	Up
TMEM30B	-1.11833	10.4475	-13.0341	5.42e-33	6.78e-32	Down
CORO2B	-2.6936	4.20986	-13.0323	5.51e-33	6.88e-32	Down
TLX1	3.26939	4.73914	13.0239	5.97e-33	7.45e-32	Up
CD209	-3.06635	6.4395	-13.0215	6.11e-33	7.62e-32	Down
ATAD5	1.34262	7.0954	13.0197	6.21e-33	7.74e-32	Up
ARHGAP17	-0.699172	10.3363	-13.0176	6.33e-33	7.89e-32	Down
RNF43	2.12181	12.0771	13.0163	6.41e-33	7.98e-32	Up
TPRG1L	-0.870193	10.804	-13.0089	6.87e-33	8.55e-32	Down
CKS2	1.42283	9.93473	13.0076	6.96e-33	8.65e-32	Up
FRMD3	-2.97509	4.82978	-13.0071	6.99e-33	8.69e-32	Down
LEMD1	3.97463	3.70389	13.005	7.13e-33	8.85e-32	Up
C8orf80	-3.11364	3.16101	-13.0043	7.18e-33	8.91e-32	Down
EFCAB1	-1.47424	1.29726	-13.0011	7.39e-33	9.17e-32	Down
PCSK9	2.88734	9.54182	12.9976	7.65e-33	9.48e-32	Up
MT1E	-3.54447	8.82221	-12.9955	7.8e-33	9.66e-32	Down
VAT1L	-2.45212	5.27392	-12.9953	7.81e-33	9.67e-32	Down
GTF3A	1.57604	11.5965	12.9887	8.31e-33	1.03e-31	Up
CNTNAP3	-2.82547	3.07143	-12.9869	8.45e-33	1.05e-31	Down
KCNAB1	-1.70016	4.43313	-12.9853	8.58e-33	1.06e-31	Down
PES1	0.830748	11.0098	12.9846	8.64e-33	1.07e-31	Up
NIP7	0.780791	9.82436	12.9842	8.67e-33	1.07e-31	Up
UCN2	2.53297	2.81733	12.9822	8.83e-33	1.09e-31	Up
NIT2	0.941228	9.66664	12.9819	8.86e-33	1.09e-31	Up
GPR142	-1.28861	0.696082	-12.9764	9.33e-33	1.15e-31	Down
NEURL1B	-1.49498	10.2772	-12.9761	9.35e-33	1.15e-31	Down
RRM2	1.41048	10.9277	12.9755	9.41e-33	1.16e-31	Up
RASD2	-2.52222	7.05233	-12.9743	9.52e-33	1.17e-31	Down
SCLY	0.905135	8.79183	12.9739	9.55e-33	1.17e-31	Up
C1orf96	0.942951	7.86584	12.9734	9.6e-33	1.18e-31	Up
PRKACB	-2.24702	9.90713	-12.971	9.82e-33	1.21e-31	Down
TAS1R1	-1.77668	1.07615	-12.9692	9.99e-33	1.23e-31	Down
KIAA1211	-2.14616	8.32771	-12.9689	1e-32	1.23e-31	Down
CHGB	-4.29583	4.43674	-12.9686	1e-32	1.23e-31	Down
ABHD6	-1.03995	8.25781	-12.9676	1.01e-32	1.24e-31	Down
CNPY2	0.719538	10.5998	12.9651	1.04e-32	1.27e-31	Up
COPS7B	0.735155	9.5048	12.9618	1.07e-32	1.31e-31	Up
DKFZp779M0652	-1.45978	0.99249	-12.9548	1.14e-32	1.4e-31	Down
KIFC1	1.20727	9.79089	12.9546	1.15e-32	1.4e-31	Up
BTBD16	2.50246	2.89061	12.9509	1.19e-32	1.45e-31	Up
FAM98A	0.582458	9.95012	12.9506	1.19e-32	1.45e-31	Up
DNA2	1.41982	7.58552	12.9497	1.2e-32	1.46e-31	Up
TG	3.99167	5.93757	12.9491	1.21e-32	1.47e-31	Up
SGOL2	1.0952	8.15424	12.9489	1.21e-32	1.47e-31	Up
TRAF5	1.44315	9.91029	12.9469	1.23e-32	1.5e-31	Up
HIST1H1C	-1.9539	8.14972	-12.9466	1.23e-32	1.5e-31	Down
UQCRFS1	-0.922959	11.1546	-12.9453	1.25e-32	1.52e-31	Down
ABP1	-2.07149	11.9879	-12.9415	1.3e-32	1.57e-31	Down
RAVER2	-1.1268	9.78112	-12.9404	1.31e-32	1.59e-31	Down
IGSF10	-3.15506	4.41722	-12.9403	1.31e-32	1.59e-31	Down
ADAM12	3.5621	7.53821	12.9396	1.32e-32	1.6e-31	Up
SMARCC1	0.782899	11.872	12.9388	1.33e-32	1.61e-31	Up
TDRD10	-1.74471	1.99689	-12.9375	1.35e-32	1.63e-31	Down
ARHGEF37	-1.68998	7.96272	-12.935	1.38e-32	1.67e-31	Down
IL23A	2.58644	4.8276	12.934	1.39e-32	1.68e-31	Up
HTR3A	-2.9363	1.98667	-12.9295	1.45e-32	1.75e-31	Down
CDC45	1.55425	8.30028	12.9291	1.45e-32	1.76e-31	Up
LRRTM3	-0.935837	0.31107	-12.9281	1.47e-32	1.77e-31	Down
UTP6	0.71081	9.81264	12.9266	1.49e-32	1.8e-31	Up
SEZ6L	-2.22961	1.20629	-12.9253	1.51e-32	1.82e-31	Down
RP9	0.93138	7.5292	12.925	1.51e-32	1.82e-31	Up
SNAI1	1.70929	6.73371	12.9247	1.52e-32	1.83e-31	Up
HMGCL	-0.978217	9.94958	-12.9246	1.52e-32	1.83e-31	Down
NECAB1	-2.5143	3.98265	-12.9213	1.57e-32	1.89e-31	Down
NUP93	0.735634	10.1071	12.9198	1.59e-32	1.91e-31	Up
DIS3	0.821063	10.2697	12.917	1.63e-32	1.96e-31	Up
PAQR5	-2.19543	8.4371	-12.9146	1.67e-32	2e-31	Down
GLTPD1	-1.03927	9.54482	-12.9139	1.68e-32	2.02e-31	Down
HDAC2	0.776194	11.3734	12.9095	1.75e-32	2.1e-31	Up
LGALS2	-3.84153	5.94461	-12.9088	1.76e-32	2.11e-31	Down
LOC100130933	-1.93939	5.42681	-12.9073	1.79e-32	2.14e-31	Down
ECE2	1.11166	8.31535	12.9036	1.85e-32	2.21e-31	Up
SHB	1.01253	9.74717	12.9029	1.86e-32	2.23e-31	Up
RPS6KA5	-1.42664	7.26446	-12.9002	1.91e-32	2.28e-31	Down
CLCNKB	-1.91737	0.977122	-12.8964	1.98e-32	2.36e-31	Down
MGAT4A	-1.20824	10.3679	-12.895	2e-32	2.39e-31	Down
OTUD6B	1.14169	8.45121	12.8946	2.01e-32	2.4e-31	Up
RBMX	0.624054	11.958	12.8932	2.04e-32	2.43e-31	Up
WBSCR22	0.81484	10.8592	12.8926	2.05e-32	2.45e-31	Up
ZNF697	1.31258	7.43899	12.8914	2.07e-32	2.47e-31	Up
ROGDI	-0.935314	8.43826	-12.8888	2.12e-32	2.53e-31	Down
KIF5C	-2.49618	4.71695	-12.8853	2.19e-32	2.61e-31	Down
PTRH1	1.20801	7.6086	12.8833	2.23e-32	2.66e-31	Up
HSPB8	-3.2361	7.14938	-12.8829	2.24e-32	2.67e-31	Down
TTLL6	-2.78295	4.87508	-12.8775	2.36e-32	2.81e-31	Down
ADAMTSL1	-2.54191	5.96018	-12.8772	2.37e-32	2.81e-31	Down
SPRY4	1.09916	9.9415	12.8747	2.42e-32	2.88e-31	Up
VPREB3	-2.8105	3.05982	-12.8741	2.44e-32	2.89e-31	Down
SLC32A1	-0.979638	0.201224	-12.8726	2.47e-32	2.93e-31	Down
PTCHD1	-3.25506	2.31189	-12.8696	2.54e-32	3.01e-31	Down
UGT2A3	-5.22462	6.47981	-12.8691	2.55e-32	3.03e-31	Down
EYA2	-3.815	4.98149	-12.8673	2.6e-32	3.07e-31	Down
ATRNL1	-2.86347	2.54082	-12.8673	2.6e-32	3.07e-31	Down
KCNC1	-1.72996	1.43788	-12.8659	2.63e-32	3.11e-31	Down
SAMD10	1.3323	7.94777	12.8635	2.69e-32	3.18e-31	Up
HMGA1	1.29248	12.7839	12.8618	2.73e-32	3.23e-31	Up
TMEM63A	1.16574	11.6905	12.8606	2.76e-32	3.27e-31	Up
ZNF643	1.35918	5.4222	12.8545	2.93e-32	3.45e-31	Up
RRP1B	0.852341	10.2147	12.8535	2.95e-32	3.49e-31	Up
FBXO8	-0.794605	8.48757	-12.8464	3.16e-32	3.72e-31	Down
SLC29A1	1.17496	10.7264	12.8461	3.17e-32	3.73e-31	Up
ACCN2	1.91366	8.06616	12.8413	3.31e-32	3.9e-31	Up
NCAPD3	1.02819	9.84543	12.8406	3.33e-32	3.92e-31	Up
UTP18	0.789734	9.74638	12.84	3.35e-32	3.95e-31	Up
HS6ST3	-2.28672	1.25914	-12.8396	3.37e-32	3.96e-31	Down
KCNA1	-2.35977	1.07731	-12.8338	3.55e-32	4.17e-31	Down
SULT1B1	-3.20877	6.98364	-12.8331	3.58e-32	4.2e-31	Down
NTNG1	-2.59132	1.56272	-12.8315	3.63e-32	4.26e-31	Down
DIRC2	-0.999838	8.14013	-12.821	4e-32	4.7e-31	Down
SNAP25	-3.2036	2.84701	-12.817	4.16e-32	4.87e-31	Down
SCIN	-3.10833	7.80206	-12.8169	4.16e-32	4.87e-31	Down
GPBP1L1	-0.622955	11.446	-12.8158	4.21e-32	4.92e-31	Down
MCM6	0.93113	10.4744	12.8156	4.21e-32	4.93e-31	Up
SHOX	-1.8787	1.22104	-12.8138	4.28e-32	5.01e-31	Down
AKAP9	-1.04847	10.2761	-12.8072	4.55e-32	5.33e-31	Down
KIF1C	-0.958601	11.856	-12.7929	5.21e-32	6.09e-31	Down
BTBD3	-1.19261	9.68231	-12.7923	5.24e-32	6.11e-31	Down
HCFC2	-1.24564	7.31185	-12.7912	5.29e-32	6.17e-31	Down
PAMR1	-2.0463	6.3679	-12.7898	5.36e-32	6.25e-31	Down
CAMK2A	-1.99188	2.36833	-12.7891	5.4e-32	6.29e-31	Down
ZDHHC7	-0.665495	10.5102	-12.7876	5.47e-32	6.38e-31	Down
C7orf10	-2.46871	4.89372	-12.7851	5.6e-32	6.52e-31	Down
LRRC19	-3.40853	8.39962	-12.7849	5.61e-32	6.53e-31	Down
UTP15	0.806554	8.15438	12.7819	5.77e-32	6.71e-31	Up
PRC1	1.20838	10.2165	12.7775	6.01e-32	6.99e-31	Up
CEBPB	1.13396	9.86623	12.775	6.15e-32	7.15e-31	Up
C8orf85	-2.02132	1.81286	-12.775	6.16e-32	7.15e-31	Down
POLD4	-1.00375	10.7175	-12.7748	6.16e-32	7.15e-31	Down
COL4A6	-3.10981	3.49681	-12.7721	6.32e-32	7.33e-31	Down
HLF	-2.37721	5.4259	-12.7707	6.41e-32	7.43e-31	Down
GDNF	-1.69846	1.37935	-12.7705	6.42e-32	7.44e-31	Down
ATP2B1	-0.940212	10.3045	-12.7663	6.67e-32	7.73e-31	Down
UMPS	0.646417	9.69628	12.7642	6.8e-32	7.87e-31	Up
JPH3	-2.25573	2.32505	-12.7563	7.33e-32	8.47e-31	Down
C9orf7	-1.06992	9.83501	-12.7541	7.48e-32	8.64e-31	Down
FANCD2	1.1465	8.82082	12.7527	7.58e-32	8.75e-31	Up
PRPF19	0.686368	11.8154	12.7503	7.75e-32	8.95e-31	Up
KIAA1239	-2.68461	2.5198	-12.7497	7.79e-32	8.99e-31	Down
DENR	0.579883	10.6132	12.7494	7.82e-32	9.02e-31	Up
FOXM1	1.37524	10.4151	12.7483	7.89e-32	9.1e-31	Up
ACADM	-1.28578	9.6938	-12.7482	7.9e-32	9.1e-31	Down
RPUSD4	0.762707	9.3739	12.7479	7.92e-32	9.12e-31	Up
PDCD5	1.00242	10.116	12.7476	7.95e-32	9.15e-31	Up
G3BP1	0.68818	11.4004	12.7445	8.18e-32	9.41e-31	Up
GYPC	-2.05243	7.18281	-12.7443	8.19e-32	9.42e-31	Down
MOBKL2A	-0.895073	9.5568	-12.7361	8.85e-32	1.02e-30	Down
C7orf31	-1.68383	6.66991	-12.7356	8.89e-32	1.02e-30	Down
ENTPD3	-3.16974	3.60487	-12.7347	8.96e-32	1.03e-30	Down
CD200R1	-2.30615	3.20185	-12.7334	9.07e-32	1.04e-30	Down
STYK1	-1.91263	7.50876	-12.7307	9.3e-32	1.07e-30	Down
PGM5	-3.77444	7.34645	-12.7283	9.51e-32	1.09e-30	Down
GNB1L	1.20498	7.38834	12.7236	9.94e-32	1.14e-30	Up
RPS6KL1	1.40151	7.19747	12.7213	1.02e-31	1.16e-30	Up
TLL1	-2.8515	3.34639	-12.7207	1.02e-31	1.17e-30	Down
MUDENG	-0.826873	9.71654	-12.7093	1.14e-31	1.3e-30	Down
NMNAT1	-0.93081	8.37033	-12.7076	1.15e-31	1.32e-30	Down
LCN10	-2.39279	2.43724	-12.7075	1.15e-31	1.32e-30	Down
PRSS36	-1.51223	5.13856	-12.7059	1.17e-31	1.34e-30	Down
DNAJC10	0.819988	11.1917	12.7047	1.19e-31	1.35e-30	Up
TRIM28	0.746527	12.7988	12.7038	1.19e-31	1.36e-30	Up
GPR27	-1.68301	0.898354	-12.7019	1.22e-31	1.39e-30	Down
POLR1A	1.01394	10.1707	12.7008	1.23e-31	1.4e-30	Up
PSMC3IP	1.44044	6.45313	12.6965	1.28e-31	1.46e-30	Up
SVOP	-2.44186	1.54365	-12.6889	1.37e-31	1.56e-30	Down
RPL36A	2.04531	7.00355	12.6834	1.44e-31	1.64e-30	Up
FAM120AOS	-0.743023	9.88277	-12.6775	1.53e-31	1.73e-30	Down
CAPN2	-1.19289	12.2088	-12.6748	1.57e-31	1.78e-30	Down
KARS	0.591763	12.0178	12.673	1.59e-31	1.81e-30	Up
?|10357	1.07793	7.68916	12.6687	1.66e-31	1.88e-30	Up
SNX24	-1.55722	6.41934	-12.6682	1.66e-31	1.89e-30	Down
BCAS1	-3.03081	9.33093	-12.6677	1.67e-31	1.89e-30	Down
GINS1	1.50161	8.98934	12.6627	1.75e-31	1.98e-30	Up
PGR	-2.76225	4.05363	-12.659	1.81e-31	2.05e-30	Down
SNAP29	-0.551996	9.61535	-12.6572	1.84e-31	2.09e-30	Down
SPERT	3.16605	2.87135	12.6569	1.85e-31	2.09e-30	Up
LOC389791	2.24173	3.6179	12.6499	1.97e-31	2.23e-30	Up
UGT1A7	-2.12992	0.6113	-12.6494	1.98e-31	2.24e-30	Down
PPP1R14B	0.897818	10.5766	12.6473	2.02e-31	2.28e-30	Up
RELN	-3.68819	3.84504	-12.6447	2.07e-31	2.34e-30	Down
KY	-2.28431	2.25167	-12.6409	2.15e-31	2.42e-30	Down
WDR67	1.0402	7.74003	12.6398	2.17e-31	2.44e-30	Up
ATRIP	0.817799	7.69444	12.6378	2.21e-31	2.49e-30	Up
KIF24	1.11512	7.35369	12.6371	2.22e-31	2.5e-30	Up
CEACAM3	-2.41509	2.71135	-12.6343	2.28e-31	2.57e-30	Down
UPF3B	1.02485	8.70262	12.6338	2.29e-31	2.58e-30	Up
SRPRB	0.798276	10.6835	12.629	2.4e-31	2.69e-30	Up
TIGD1	1.37913	6.80045	12.6281	2.42e-31	2.71e-30	Up
MCF2L2	-1.25138	3.1393	-12.6276	2.43e-31	2.72e-30	Down
ERBB4	-1.53769	0.719633	-12.6253	2.48e-31	2.78e-30	Down
PROKR1	-1.08134	0.470561	-12.6247	2.49e-31	2.8e-30	Down
DLGAP4	0.844052	11.1072	12.6187	2.64e-31	2.95e-30	Up
ADRM1	0.973265	11.6706	12.6143	2.75e-31	3.07e-30	Up
ATP2B2	-1.85666	1.21602	-12.614	2.76e-31	3.08e-30	Down
PDLIM2	-1.36368	8.49103	-12.6134	2.77e-31	3.1e-30	Down
KLF9	-1.87382	9.00177	-12.6092	2.88e-31	3.22e-30	Down
TPO	-2.51813	1.88059	-12.608	2.91e-31	3.25e-30	Down
GPA33	-2.25084	12.0216	-12.6079	2.92e-31	3.26e-30	Down
MOCS1	-1.84813	7.5338	-12.6064	2.95e-31	3.3e-30	Down
BMP2	-2.19477	8.22176	-12.6032	3.05e-31	3.4e-30	Down
PYCRL	1.36443	8.95091	12.6024	3.07e-31	3.42e-30	Up
RGS22	-1.64425	0.953371	-12.6002	3.13e-31	3.49e-30	Down
PA2G4P4	0.994431	6.50869	12.5987	3.17e-31	3.54e-30	Up
PCNXL2	1.37695	7.88306	12.596	3.25e-31	3.62e-30	Up
ATG4A	-0.946211	8.17256	-12.5959	3.26e-31	3.62e-30	Down
LMBR1	0.785604	10.0873	12.592	3.38e-31	3.76e-30	Up
PASK	1.10025	8.22536	12.5887	3.48e-31	3.87e-30	Up
SSBP2	-2.24049	6.02833	-12.5838	3.64e-31	4.05e-30	Down
KCNMA1	-3.68657	7.34043	-12.5834	3.66e-31	4.06e-30	Down
ACBD6	0.774114	8.90094	12.5822	3.7e-31	4.11e-30	Up
TMEM108	-1.9567	3.15802	-12.5782	3.84e-31	4.26e-30	Down
ADAMTSL3	-3.49888	4.98549	-12.5781	3.84e-31	4.26e-30	Down
RNF8	0.634574	8.82455	12.5763	3.91e-31	4.33e-30	Up
NANP	1.17975	7.8478	12.5756	3.93e-31	4.35e-30	Up
ATP6V1D	-0.689115	9.9006	-12.5748	3.96e-31	4.39e-30	Down
SELENBP1	-2.59757	12.0739	-12.5724	4.05e-31	4.48e-30	Down
CAMTA2	-0.951422	9.81058	-12.5722	4.06e-31	4.49e-30	Down
USP31	0.795811	8.49884	12.572	4.07e-31	4.49e-30	Up
FAM188B	1.20494	7.48386	12.5639	4.38e-31	4.84e-30	Up
PNN	0.820827	10.9863	12.5582	4.62e-31	5.1e-30	Up
ENTPD8	-3.45435	7.64114	-12.5564	4.7e-31	5.18e-30	Down
DPEP3	-1.51134	0.704016	-12.5544	4.79e-31	5.28e-30	Down
LMO3	-4.05576	4.7036	-12.5505	4.96e-31	5.47e-30	Down
MSH5	1.55956	8.26217	12.5475	5.1e-31	5.62e-30	Up
PDRG1	1.17629	9.31645	12.5462	5.16e-31	5.68e-30	Up
AKR1B10	-4.45346	7.48343	-12.5402	5.46e-31	6.01e-30	Down
TMOD1	-1.97836	6.705	-12.5371	5.61e-31	6.17e-30	Down
NUP35	0.799145	8.24281	12.5337	5.8e-31	6.37e-30	Up
TLX2	-1.83844	1.40414	-12.5307	5.96e-31	6.55e-30	Down
SSRP1	0.668169	12.1728	12.5241	6.34e-31	6.96e-30	Up
PHF6	0.853571	9.68592	12.5172	6.76e-31	7.41e-30	Up
SSBP1	0.822179	10.5718	12.5149	6.89e-31	7.56e-30	Up
MBOAT1	-1.23087	8.99168	-12.5146	6.92e-31	7.58e-30	Down
NR3C1	-2.10282	8.08264	-12.5133	7e-31	7.67e-30	Down
ARFGAP1	1.04004	11.0195	12.5126	7.05e-31	7.72e-30	Up
NKD1	3.95905	8.36702	12.5076	7.38e-31	8.07e-30	Up
FNIP2	-1.21224	9.15963	-12.5048	7.57e-31	8.28e-30	Down
STK31	3.18669	4.40086	12.5023	7.75e-31	8.47e-30	Up
LY9	-2.84821	4.12991	-12.5008	7.86e-31	8.59e-30	Down
LTBP4	-1.66989	11.0464	-12.5003	7.9e-31	8.62e-30	Down
DIRAS1	-2.63894	3.6415	-12.4997	7.94e-31	8.66e-30	Down
BFSP1	1.85101	5.52585	12.4991	7.98e-31	8.71e-30	Up
SDAD1	0.577601	9.96074	12.4962	8.2e-31	8.94e-30	Up
APOBEC3A	-2.29311	4.18224	-12.4956	8.24e-31	8.98e-30	Down
CHI3L1	3.47625	8.04253	12.4938	8.38e-31	9.13e-30	Up
PAFAH1B1	-0.743933	11.116	-12.4906	8.64e-31	9.4e-30	Down
C21orf59	0.798819	9.85954	12.4894	8.73e-31	9.5e-30	Up
THOC2	0.864608	10.6849	12.4885	8.81e-31	9.58e-30	Up
BCL2L12	0.955428	8.76602	12.4871	8.92e-31	9.69e-30	Up
PLEKHG4	1.81622	9.15794	12.4857	9.03e-31	9.81e-30	Up
SNAPC4	0.892487	8.76954	12.4852	9.08e-31	9.86e-30	Up
AQP4	-1.74028	0.690012	-12.4847	9.12e-31	9.9e-30	Down
AASDHPPT	0.652072	9.4317	12.4838	9.2e-31	9.98e-30	Up
PDE4D	-1.51483	8.29713	-12.479	9.61e-31	1.04e-29	Down
GJB4	3.28677	5.53811	12.4778	9.72e-31	1.05e-29	Up
PCDH11Y	-1.24087	0.306558	-12.4773	9.76e-31	1.06e-29	Down
EIF3M	0.727885	11.708	12.476	9.88e-31	1.07e-29	Up
KIRREL3	-2.51861	2.45164	-12.4712	1.03e-30	1.12e-29	Down
NCRNA00152	1.48456	7.05784	12.4698	1.05e-30	1.13e-29	Up
CCNJ	0.88224	8.06118	12.4698	1.05e-30	1.13e-29	Up
SOCS6	-1.02748	9.45148	-12.4682	1.06e-30	1.15e-29	Down
PSME4	0.608984	10.5875	12.4655	1.09e-30	1.18e-29	Up
SCNN1G	-3.95482	2.57234	-12.4633	1.11e-30	1.2e-29	Down
RHOU	-1.44672	9.47334	-12.4534	1.22e-30	1.31e-29	Down
LARGE	-1.32762	8.77903	-12.4502	1.25e-30	1.35e-29	Down
LGALS9C	-2.72914	7.21693	-12.4448	1.32e-30	1.42e-29	Down
CST4	3.33431	3.10405	12.4447	1.32e-30	1.42e-29	Up
BLK	-3.45338	2.85035	-12.4428	1.34e-30	1.44e-29	Down
GCNT4	-2.48169	3.68489	-12.439	1.39e-30	1.5e-29	Down
UNC5CL	2.19151	7.77945	12.438	1.4e-30	1.51e-29	Up
ATXN7L2	1.00496	6.57201	12.4378	1.41e-30	1.51e-29	Up
RIPK1	-0.674627	9.80721	-12.434	1.46e-30	1.56e-29	Down
GDE1	-0.753348	11.3182	-12.4327	1.47e-30	1.58e-29	Down
SLC10A4	-2.11026	2.10405	-12.4285	1.53e-30	1.64e-29	Down
BTNL3	-3.5781	7.2161	-12.4284	1.53e-30	1.64e-29	Down
PRKAR2B	-2.53584	6.76912	-12.4242	1.59e-30	1.71e-29	Down
KCNMB2	-1.92841	1.91546	-12.423	1.61e-30	1.73e-29	Down
ARHGEF38	1.24501	4.97006	12.423	1.61e-30	1.73e-29	Up
ASXL3	-2.98642	3.24667	-12.4211	1.64e-30	1.75e-29	Down
LPCAT3	-1.0277	10.4337	-12.4209	1.64e-30	1.76e-29	Down
ADORA3	-2.36496	5.1596	-12.4205	1.65e-30	1.76e-29	Down
SNRPE	0.922467	9.89088	12.4154	1.73e-30	1.85e-29	Up
RNF219	0.97616	8.82031	12.4076	1.86e-30	1.98e-29	Up
C22orf29	1.02094	9.20991	12.4029	1.94e-30	2.07e-29	Up
GBA2	-0.864903	10.5504	-12.4015	1.96e-30	2.09e-29	Down
STC1	2.22084	7.80742	12.3998	2e-30	2.13e-29	Up
PSRC1	1.23486	7.78054	12.3987	2.02e-30	2.15e-29	Up
TFR2	2.661	5.48295	12.3967	2.05e-30	2.19e-29	Up
AKAP8L	0.723271	9.48821	12.3962	2.06e-30	2.19e-29	Up
SH3GL2	-2.63179	1.84906	-12.3959	2.07e-30	2.2e-29	Down
TCEAL7	-2.20716	4.54578	-12.3945	2.09e-30	2.23e-29	Down
C12orf48	1.28506	8.20817	12.3936	2.11e-30	2.25e-29	Up
RNF150	-3.18386	3.61461	-12.3924	2.14e-30	2.27e-29	Down
CHRM4	-2.0896	1.98941	-12.3922	2.14e-30	2.27e-29	Down
BMP5	-3.54566	3.7226	-12.3921	2.14e-30	2.27e-29	Down
KIAA1409	-1.48813	1.68631	-12.3911	2.16e-30	2.29e-29	Down
HADH	-1.04191	11.08	-12.3874	2.24e-30	2.37e-29	Down
ITGB1BP3	-0.835318	0.179661	-12.3852	2.28e-30	2.42e-29	Down
SETD6	0.881424	8.14046	12.3844	2.3e-30	2.43e-29	Up
TRMT112	0.956882	10.944	12.3838	2.31e-30	2.45e-29	Up
ARHGEF18	-0.93202	10.6813	-12.3838	2.31e-30	2.45e-29	Down
RCC1	1.10521	10.2666	12.3818	2.36e-30	2.49e-29	Up
SFRS13A	0.532865	10.7949	12.3787	2.42e-30	2.56e-29	Up
TOPBP1	0.729554	9.99123	12.3693	2.64e-30	2.79e-29	Up
SRRT	0.576759	11.1961	12.3684	2.66e-30	2.81e-29	Up
NFKBIL2	1.3007	9.16946	12.3658	2.73e-30	2.88e-29	Up
LRRC20	0.956666	8.55357	12.3651	2.75e-30	2.9e-29	Up
FAM13B	-1.01723	8.72217	-12.3635	2.79e-30	2.94e-29	Down
PANK3	-1.11825	9.18869	-12.3627	2.81e-30	2.96e-29	Down
HSPB6	-3.86328	7.37475	-12.3566	2.97e-30	3.12e-29	Down
MFSD4	-2.5844	7.6439	-12.3543	3.03e-30	3.19e-29	Down
ANKS6	0.969507	9.59729	12.3521	3.1e-30	3.26e-29	Up
LSG1	0.549593	10.0371	12.3507	3.14e-30	3.3e-29	Up
NAA16	1.01949	8.33515	12.3499	3.16e-30	3.32e-29	Up
SIGLEC8	-2.82335	3.36888	-12.3489	3.19e-30	3.35e-29	Down
CREBZF	0.799164	10.2922	12.3462	3.27e-30	3.43e-29	Up
DDX11	1.24265	9.33052	12.3434	3.35e-30	3.52e-29	Up
MPEG1	-2.54709	8.6122	-12.3423	3.39e-30	3.55e-29	Down
IPO5	0.934917	12.2032	12.3422	3.39e-30	3.55e-29	Up
BIRC5	1.42384	8.96265	12.3418	3.4e-30	3.56e-29	Up
TBPL2	-0.873829	0.24145	-12.3366	3.57e-30	3.74e-29	Down
ACTR5	0.948054	8.25975	12.336	3.59e-30	3.75e-29	Up
FASN	1.34025	12.443	12.3352	3.62e-30	3.78e-29	Up
EIF4EBP2	-0.73462	12.0516	-12.3295	3.81e-30	3.98e-29	Down
LRAT	-2.41352	1.54207	-12.3203	4.15e-30	4.33e-29	Down
PABPC1L2A	-0.391991	0.0744157	-12.3195	4.18e-30	4.36e-29	Down
TCFL5	1.28244	8.71	12.3163	4.3e-30	4.49e-29	Up
ACTL6A	0.766082	10.5713	12.314	4.39e-30	4.58e-29	Up
RANBP1	0.945379	10.5184	12.3137	4.4e-30	4.59e-29	Up
PTMA	0.684157	14.7308	12.3122	4.46e-30	4.65e-29	Up
RHOC	-1.02311	12.3774	-12.3099	4.56e-30	4.75e-29	Down
ITGA8	-2.9462	4.25094	-12.3043	4.8e-30	5e-29	Down
PSD	-3.54578	5.57872	-12.3038	4.82e-30	5.02e-29	Down
UAP1	-0.861215	10.4736	-12.3027	4.87e-30	5.07e-29	Down
R3HDM1	0.723546	9.60185	12.3008	4.96e-30	5.15e-29	Up
SEMA3D	-3.36522	3.75272	-12.3	4.99e-30	5.19e-29	Down
GAD1	3.74265	4.18869	12.2998	5e-30	5.2e-29	Up
NOC2L	0.82949	11.3209	12.297	5.13e-30	5.33e-29	Up
SECISBP2L	-0.968087	9.34028	-12.2956	5.2e-30	5.39e-29	Down
KANK2	-1.58958	10.1528	-12.2932	5.32e-30	5.51e-29	Down
PCP4L1	-3.03461	2.47023	-12.2926	5.34e-30	5.54e-29	Down
FAM8A1	-0.832496	9.88553	-12.2917	5.39e-30	5.58e-29	Down
CRYZL1	-0.754526	7.90184	-12.2891	5.52e-30	5.72e-29	Down
AMMECR1	0.869107	9.03759	12.288	5.58e-30	5.77e-29	Up
IMPA2	-1.22962	9.91853	-12.2823	5.88e-30	6.08e-29	Down
ZNF229	-2.18343	3.15169	-12.2792	6.04e-30	6.25e-29	Down
C16orf88	0.756662	8.90154	12.2761	6.22e-30	6.42e-29	Up
AGTR1	-3.67225	3.12903	-12.2737	6.36e-30	6.56e-29	Down
PPP1R1A	-3.67976	2.76375	-12.2704	6.55e-30	6.76e-29	Down
FAM54B	-0.716417	9.36045	-12.2702	6.56e-30	6.77e-29	Down
PLA2G10	-2.42689	6.85359	-12.2702	6.56e-30	6.77e-29	Down
TRIM65	0.831043	9.36088	12.2674	6.73e-30	6.94e-29	Up
ZFYVE28	-1.50201	7.59114	-12.2649	6.89e-30	7.1e-29	Down
CA12	-2.64067	10.9649	-12.2616	7.1e-30	7.31e-29	Down
FBXO41	1.83565	8.32077	12.2613	7.12e-30	7.32e-29	Up
IL2	-0.744353	0.30459	-12.2611	7.13e-30	7.34e-29	Down
CAV1	-1.97402	9.62322	-12.2609	7.15e-30	7.35e-29	Down
HEATR5A	-0.952704	9.29519	-12.258	7.34e-30	7.54e-29	Down
[truncated: 12,864 more rows]
