# Supplementary material for: Elucidation of the anti-colorectal cancer mechanism of Atractylodes lancea by network pharmacology and experimental verification
Source: Aging (Albany NY). 2024 Aug 22;16(16):12008–28. doi: 10.18632/aging.206075 (PMC11386916; doi:10.18632/aging.206075)
Supplement: Supplementary Table 8 [file aging-16-206075-s008.xlsx]

## Sheet: GO.result_all
Supplementary Table 8. GO enrichment analysis of potential target genes of Atractylodes lancea’s potential bioactive compounds (p-value < 0.05).
ID	Description	GeneRatio	BgRatio	pvalue	p.adjust	qvalue	geneID	Count
GO:0000302	response to reactive oxygen species	0.26087	203/18800	1.97246e-20	6.46374e-17	2.58288e-17	MAPK1/HMOX1/HGF/TRPA1/UCP1/MAPK3/IL1A/EGFR/FOS/CASP3/UCP2/MET/MMP9/BCL2/IL6/IL10/HIF1A/PRKCD	18
GO:0006979	response to oxidative stress	0.318841	433/18800	1.19917e-19	1.96485e-16	7.85143e-17	ERCC1/MAPK1/HMOX1/HGF/TRPA1/UCP1/MAPK3/IL1A/EGFR/MMP3/FOS/CASP3/UCP2/MET/CTNNB1/MCL1/MMP9/BCL2/IL6/IL10/HIF1A/PRKCD	22
GO:0062197	cellular response to chemical stress	0.289855	332/18800	2.59423e-19	2.83377e-16	1.13236e-16	MAPK1/HMOX1/RELB/HGF/TRPA1/UCP1/MAPK3/EGFR/MMP3/FOS/CASP3/MET/CTNNB1/MCL1/MMP9/BCL2/IL6/IL10/HIF1A/PRKCD	20
GO:0034599	cellular response to oxidative stress	0.26087	284/18800	8.44385e-18	6.91763e-15	2.76425e-15	MAPK1/HMOX1/HGF/TRPA1/UCP1/MAPK3/EGFR/MMP3/FOS/MET/CTNNB1/MCL1/MMP9/BCL2/IL6/IL10/HIF1A/PRKCD	18
GO:2001233	regulation of apoptotic signaling pathway	0.275362	370/18800	4.59978e-17	3.01469e-14	1.20466e-14	NGFR/HMOX1/HGF/SERPINE1/BMP4/IL1A/ICAM1/RB1/BAX/BCL2L1/CFLAR/GSK3B/CTNNB1/MCL1/MMP9/BCL2/HIF1A/PRKCD/BBC3	19
GO:0050673	epithelial cell proliferation	0.289855	443/18800	7.27562e-17	3.9737e-14	1.58787e-14	NGFR/MAPK1/HMOX1/TGFB1/HGF/BMP4/STAT3/RB1/ERBB2/EGFR/BAX/PPARD/CFLAR/CTNNB1/HMGB1/IL6/IL10/HIF1A/PGF/VEGFA	20
GO:2001234	negative regulation of apoptotic signaling pathway	0.231884	230/18800	1.6054e-16	7.51556e-14	3.00318e-14	HMOX1/HGF/SERPINE1/BMP4/IL1A/ICAM1/RB1/BAX/BCL2L1/CFLAR/GSK3B/CTNNB1/MCL1/MMP9/BCL2/HIF1A	16
GO:1901652	response to peptide	0.289855	491/18800	5.26302e-16	2.15587e-13	8.61474e-14	NGFR/CDC6/NFKBIA/TIMP1/PLAT/NFKB1/MMP13/STAT3/ICAM1/RB1/STAT5B/MMP3/INSR/UCP2/CFLAR/GSK3B/MMP9/IL10/PPARA/PRKCD	20
GO:0048732	gland development	0.275362	431/18800	7.63942e-16	2.7816e-13	1.11151e-13	MAPK1/HMOX1/TGFB1/HGF/BMP4/MAPK3/EGFR/BAX/STAT5B/INSR/UCP2/CFLAR/MET/CTNNB1/BCL2/IL6/IL10/HIF1A/VEGFA	19
GO:0070661	leukocyte proliferation	0.246377	330/18800	2.46889e-15	8.09055e-13	3.23295e-13	MAPK1/AHR/BMP4/MAPK3/IL1A/ERBB2/BAX/STAT5B/CASP3/CTNNB1/HMGB1/BCL2/CDKN1A/IL6/IL10/PRKCD/TBK1	17
GO:0070997	neuron death	0.246377	353/18800	7.50715e-15	2.23645e-12	8.93675e-13	NGFR/HMOX1/RB1/NTRK2/BAX/BCL2L1/FOS/CASP3/GSK3B/CASP9/CTNNB1/MCL1/BCL2/IL10/HIF1A/PPARA/TBK1	17
GO:0042060	wound healing	0.26087	429/18800	1.1704e-14	3.0872e-12	1.23363e-12	VCL/HMOX1/TIMP1/PLAT/TGFB1/SERPINE1/IL1A/ERBB2/PRKCE/PPARD/CASP3/CFLAR/CDKN1A/IL6/HIF1A/VEGFA/PPARA/PRKCD	18
GO:1902893	regulation of miRNA transcription	0.144928	59/18800	1.22471e-14	3.0872e-12	1.23363e-12	NGFR/TGFB1/BMP4/STAT3/FOS/PPARD/IL10/HIF1A/PPARA/SMAD1	10
GO:0048608	reproductive structure development	0.26087	433/18800	1.37341e-14	3.1681e-12	1.26596e-12	ERCC1/MAPK1/BIK/BMP4/IL1A/EGFR/BAX/STAT5B/BCL2L1/INSR/PPARD/CASP3/CTNNB1/SPP1/BCL2/IL10/HIF1A/VEGFA	18
GO:0061614	miRNA transcription	0.144928	60/18800	1.46545e-14	3.1681e-12	1.26596e-12	NGFR/TGFB1/BMP4/STAT3/FOS/PPARD/IL10/HIF1A/PPARA/SMAD1	10
GO:0061458	reproductive system development	0.26087	436/18800	1.54683e-14	3.1681e-12	1.26596e-12	ERCC1/MAPK1/BIK/BMP4/IL1A/EGFR/BAX/STAT5B/BCL2L1/INSR/PPARD/CASP3/CTNNB1/SPP1/BCL2/IL10/HIF1A/VEGFA	18
GO:0050678	regulation of epithelial cell proliferation	0.246377	382/18800	2.74167e-14	5.28497e-12	2.11185e-12	NGFR/HMOX1/TGFB1/BMP4/STAT3/RB1/ERBB2/EGFR/BAX/PPARD/CFLAR/CTNNB1/HMGB1/IL10/HIF1A/PGF/VEGFA	17
GO:0032496	response to lipopolysaccharide	0.231884	333/18800	5.36625e-14	9.46479e-12	3.78209e-12	MAPK1/NFKBIA/LBP/TGFB1/SERPINE1/NFKB1/MAPK3/IL1A/PRKCE/FOS/PPARD/CASP3/CASP9/HMGB1/IL6/IL10	16
GO:2001237	negative regulation of extrinsic apoptotic signaling pathway	0.15942	97/18800	5.48767e-14	9.46479e-12	3.78209e-12	HMOX1/HGF/SERPINE1/BMP4/IL1A/ICAM1/BCL2L1/CFLAR/GSK3B/MCL1/BCL2	11
GO:0002237	response to molecule of bacterial origin	0.231884	354/18800	1.37915e-13	2.25974e-11	9.02981e-12	MAPK1/NFKBIA/LBP/TGFB1/SERPINE1/NFKB1/MAPK3/IL1A/PRKCE/FOS/PPARD/CASP3/CASP9/HMGB1/IL6/IL10	16
GO:0046651	lymphocyte proliferation	0.217391	296/18800	1.67934e-13	2.62057e-11	1.04717e-11	AHR/BMP4/IL1A/ERBB2/BAX/STAT5B/CASP3/CTNNB1/HMGB1/BCL2/CDKN1A/IL6/IL10/PRKCD/TBK1	15
GO:0034614	cellular response to reactive oxygen species	0.173913	147/18800	1.99344e-13	2.9088e-11	1.16234e-11	MAPK1/HGF/TRPA1/UCP1/MAPK3/EGFR/FOS/MET/MMP9/IL6/IL10/PRKCD	12
GO:0032943	mononuclear cell proliferation	0.217391	300/18800	2.04158e-13	2.9088e-11	1.16234e-11	AHR/BMP4/IL1A/ERBB2/BAX/STAT5B/CASP3/CTNNB1/HMGB1/BCL2/CDKN1A/IL6/IL10/PRKCD/TBK1	15
GO:0051098	regulation of binding	0.231884	366/18800	2.30236e-13	3.14368e-11	1.2562e-11	HMOX1/NFKBIA/TGFB1/BMP4/MAPK3/RB1/BAX/MET/GSK3B/CTNNB1/HMGB1/MMP9/CDKN1A/IL10/PPARA/PRKCD	16
GO:0070663	regulation of leukocyte proliferation	0.202899	254/18800	3.76595e-13	4.76348e-11	1.90346e-11	MAPK1/AHR/BMP4/MAPK3/IL1A/ERBB2/STAT5B/CASP3/CTNNB1/HMGB1/BCL2/CDKN1A/IL6/IL10	14
GO:1901214	regulation of neuron death	0.217391	313/18800	3.77939e-13	4.76348e-11	1.90346e-11	HMOX1/NTRK2/BAX/BCL2L1/FOS/CASP3/GSK3B/CASP9/CTNNB1/MCL1/BCL2/IL10/HIF1A/PPARA/TBK1	15
GO:0071216	cellular response to biotic stimulus	0.202899	256/18800	4.19203e-13	5.08788e-11	2.03309e-11	MAPK1/NFKBIA/LBP/TGFB1/SERPINE1/NFKB1/MAPK3/IL1A/PRKCE/PPARD/GSK3B/HMGB1/IL6/IL10	14
GO:0071222	cellular response to lipopolysaccharide	0.188406	217/18800	9.84581e-13	1.15231e-10	4.60458e-11	MAPK1/NFKBIA/LBP/TGFB1/SERPINE1/NFKB1/MAPK3/IL1A/PRKCE/PPARD/HMGB1/IL6/IL10	13
GO:0097191	extrinsic apoptotic signaling pathway	0.188406	221/18800	1.24298e-12	1.40456e-10	5.61257e-11	HMOX1/TGFB1/HGF/SERPINE1/BMP4/IL1A/ICAM1/BAX/BCL2L1/CFLAR/GSK3B/MCL1/BCL2	13
GO:0001503	ossification	0.231884	420/18800	1.87909e-12	2.05259e-10	8.20204e-11	CHRD/MAPK1/TGFB1/HGF/BMP4/MMP13/MAPK3/EGFR/GSK3B/CTNNB1/MMP9/SPP1/BCL2/IL6/HIF1A/SMAD1	16
GO:0071219	cellular response to molecule of bacterial origin	0.188406	229/18800	1.95472e-12	2.06633e-10	8.25695e-11	MAPK1/NFKBIA/LBP/TGFB1/SERPINE1/NFKB1/MAPK3/IL1A/PRKCE/PPARD/HMGB1/IL6/IL10	13
GO:0009314	response to radiation	0.231884	438/18800	3.54512e-12	3.63042e-10	1.4507e-10	ERCC1/TIMP1/IL1A/EGFR/HMGCR/BAX/MMP3/BCL2L1/FOS/CASP3/CASP9/MMP9/BCL2/CDKN1A/HIF1A/PRKCD	16
GO:0051402	neuron apoptotic process	0.188406	241/18800	3.73702e-12	3.71098e-10	1.48289e-10	NGFR/HMOX1/RB1/NTRK2/BAX/BCL2L1/CASP3/CASP9/CTNNB1/MCL1/BCL2/IL10/HIF1A	13
GO:0009411	response to UV	0.15942	146/18800	5.25124e-12	5.06127e-10	2.02246e-10	ERCC1/TIMP1/EGFR/BAX/MMP3/CASP3/CASP9/MMP9/BCL2/CDKN1A/PRKCD	11
GO:0009416	response to light stimulus	0.202899	310/18800	5.61178e-12	5.25423e-10	2.09956e-10	ERCC1/TIMP1/EGFR/HMGCR/BAX/MMP3/FOS/CASP3/CASP9/MMP9/BCL2/CDKN1A/HIF1A/PRKCD	14
GO:0018105	peptidyl-serine phosphorylation	0.202899	315/18800	6.95762e-12	6.33336e-10	2.53078e-10	MAPK1/TGFB1/HGF/CDK2/EGFR/NTRK2/BAX/PRKCE/GSK3B/BCL2/IL6/VEGFA/PRKCD/TBK1	14
GO:2001236	regulation of extrinsic apoptotic signaling pathway	0.15942	153/18800	8.77391e-12	7.77084e-10	3.10519e-10	HMOX1/HGF/SERPINE1/BMP4/IL1A/ICAM1/BCL2L1/CFLAR/GSK3B/MCL1/BCL2	11
GO:0002262	myeloid cell homeostasis	0.15942	160/18800	1.43024e-11	1.23339e-09	4.92858e-10	HMOX1/BMP4/STAT3/RB1/BAX/STAT5B/CASP3/HMGB1/IL6/HIF1A/VEGFA	11
GO:0050679	positive regulation of epithelial cell proliferation	0.173913	211/18800	1.46797e-11	1.23347e-09	4.92889e-10	HMOX1/BMP4/STAT3/ERBB2/EGFR/CFLAR/CTNNB1/HMGB1/IL10/HIF1A/PGF/VEGFA	12
GO:1902042	negative regulation of extrinsic apoptotic signaling pathway via death domain receptors	0.101449	31/18800	1.60896e-11	1.31814e-09	5.26721e-10	HMOX1/HGF/SERPINE1/ICAM1/BCL2L1/CFLAR/GSK3B	7
GO:0010638	positive regulation of organelle organization	0.231884	487/18800	1.74234e-11	1.3926e-09	5.56476e-10	ERCC1/MAPK1/BIK/MAPK3/IL1A/CDK2/RB1/BAX/INSR/PRKCE/MET/GSK3B/CTNNB1/MMP9/HIF1A/BBC3	16
GO:0018209	peptidyl-serine modification	0.202899	338/18800	1.7868e-11	1.39413e-09	5.57089e-10	MAPK1/TGFB1/HGF/CDK2/EGFR/NTRK2/BAX/PRKCE/GSK3B/BCL2/IL6/VEGFA/PRKCD/TBK1	14
GO:0043410	positive regulation of MAPK cascade	0.231884	491/18800	1.96859e-11	1.50025e-09	5.99493e-10	TGFB1/HGF/BMP4/MAPK3/IL1A/ICAM1/ERBB2/EGFR/NTRK2/INSR/PRKCE/CFLAR/CTNNB1/HMGB1/IL6/VEGFA	16
GO:0008625	extrinsic apoptotic signaling pathway via death domain receptors	0.130435	85/18800	2.32329e-11	1.73032e-09	6.91428e-10	HMOX1/HGF/SERPINE1/ICAM1/BAX/BCL2L1/CFLAR/GSK3B/BCL2	9
GO:0001666	response to hypoxia	0.188406	286/18800	3.21564e-11	2.3417e-09	9.35733e-10	HMOX1/PLAT/IL1A/PRKCE/PPARD/CASP3/UCP2/CFLAR/BCL2/HIF1A/PGF/VEGFA/PPARA	13
GO:0050670	regulation of lymphocyte proliferation	0.173913	230/18800	4.02157e-11	2.86493e-09	1.14481e-09	AHR/BMP4/IL1A/ERBB2/STAT5B/CASP3/CTNNB1/HMGB1/BCL2/CDKN1A/IL6/IL10	12
GO:0032944	regulation of mononuclear cell proliferation	0.173913	233/18800	4.67641e-11	3.26055e-09	1.3029e-09	AHR/BMP4/IL1A/ERBB2/STAT5B/CASP3/CTNNB1/HMGB1/BCL2/CDKN1A/IL6/IL10	12
GO:0036293	response to decreased oxygen levels	0.188406	299/18800	5.59416e-11	3.81918e-09	1.52613e-09	HMOX1/PLAT/IL1A/PRKCE/PPARD/CASP3/UCP2/CFLAR/BCL2/HIF1A/PGF/VEGFA/PPARA	13
GO:0031099	regeneration	0.15942	188/18800	8.21078e-11	5.49117e-09	2.19425e-09	HMOX1/HGF/PPARD/UCP2/CFLAR/SPP1/BCL2/CDKN1A/IL6/IL10/PGF	11
GO:0036473	cell death in response to oxidative stress	0.130435	98/18800	8.55319e-11	5.60576e-09	2.24003e-09	HGF/MMP3/MET/CTNNB1/MCL1/BCL2/IL10/HIF1A/PRKCD	9
GO:0050921	positive regulation of chemotaxis	0.144928	140/18800	8.8665e-11	5.69716e-09	2.27656e-09	MAPK1/LBP/TGFB1/SERPINE1/MAPK3/MET/HMGB1/IL6/PGF/VEGFA	10
GO:0002687	positive regulation of leukocyte migration	0.144928	141/18800	9.516e-11	5.99691e-09	2.39634e-09	MAPK1/LBP/SERPINE1/MAPK3/IL1A/ICAM1/HMGB1/IL6/PGF/VEGFA	10
GO:0050900	leukocyte migration	0.202899	384/18800	9.70237e-11	5.99899e-09	2.39717e-09	MAPK1/HMOX1/LBP/SERPINE1/MAPK3/IL1A/ICAM1/STAT5B/HMGB1/MMP9/IL6/IL10/PGF/VEGFA	14
GO:0030099	myeloid cell differentiation	0.202899	391/18800	1.23074e-10	7.46879e-09	2.98449e-09	NFKBIA/RELB/TGFB1/BMP4/STAT3/RB1/STAT5B/FOS/CASP3/CASP9/CTNNB1/MMP9/HIF1A/VEGFA	14
GO:0051052	regulation of DNA metabolic process	0.217391	472/18800	1.30213e-10	7.75834e-09	3.1002e-09	ERCC1/CDC6/MAPK1/TGFB1/HGF/MAPK3/CDK2/EGFR/BAX/CTNNB1/HMGB1/CDKN1A/IL6/IL10/PRKCD	15
GO:0050727	regulation of inflammatory response	0.202899	394/18800	1.36086e-10	7.96345e-09	3.18216e-09	NFKBIA/LBP/HGF/SERPINE1/NFKB1/RB1/STAT5B/MMP3/PPARD/MMP9/IL6/IL10/PPARA/PRKCD	14
GO:0071214	cellular response to abiotic stimulus	0.188406	323/18800	1.45581e-10	8.22531e-09	3.2868e-09	ERCC1/TIMP1/RELB/NFKB1/MAPK3/BAX/MMP3/BCL2L1/CASP3/CASP9/MMP9/CDKN1A/PRKCD	13
GO:0104004	cellular response to environmental stimulus	0.188406	323/18800	1.45581e-10	8.22531e-09	3.2868e-09	ERCC1/TIMP1/RELB/NFKB1/MAPK3/BAX/MMP3/BCL2L1/CASP3/CASP9/MMP9/CDKN1A/PRKCD	13
GO:0070482	response to oxygen levels	0.188406	324/18800	1.51242e-10	8.40033e-09	3.35673e-09	HMOX1/PLAT/IL1A/PRKCE/PPARD/CASP3/UCP2/CFLAR/BCL2/HIF1A/PGF/VEGFA/PPARA	13
GO:0043434	response to peptide hormone	0.202899	404/18800	1.891e-10	1.0043e-08	4.01315e-09	CDC6/TIMP1/PLAT/NFKB1/STAT3/RB1/STAT5B/INSR/UCP2/CFLAR/GSK3B/IL10/PPARA/PRKCD	14
GO:0048545	response to steroid hormone	0.188406	330/18800	1.89635e-10	1.0043e-08	4.01315e-09	PLAT/TGFB1/BMP4/FOS/PPARD/CASP3/CFLAR/CASP9/SPP1/BCL2/IL6/IL10/PPARA	13
GO:0051054	positive regulation of DNA metabolic process	0.173913	263/18800	1.90012e-10	1.0043e-08	4.01315e-09	ERCC1/MAPK1/TGFB1/HGF/MAPK3/CDK2/EGFR/BAX/CTNNB1/HMGB1/IL6/PRKCD	12
GO:0043523	regulation of neuron apoptotic process	0.15942	207/18800	2.30626e-10	1.19962e-08	4.79364e-09	HMOX1/NTRK2/BAX/BCL2L1/CASP3/CASP9/CTNNB1/MCL1/BCL2/IL10/HIF1A	11
GO:0010506	regulation of autophagy	0.188406	336/18800	2.36714e-10	1.21205e-08	4.8433e-09	HMOX1/HGF/MAPK3/STAT3/CASP3/MET/GSK3B/HMGB1/MCL1/BCL2/IL10/HIF1A/TBK1	13
GO:1902895	positive regulation of miRNA transcription	0.101449	45/18800	2.6665e-10	1.34433e-08	5.37187e-09	NGFR/TGFB1/STAT3/FOS/IL10/HIF1A/SMAD1	7
GO:0045765	regulation of angiogenesis	0.188406	345/18800	3.27492e-10	1.62605e-08	6.49762e-09	HMOX1/HGF/SERPINE1/IL1A/STAT3/ERBB2/CTNNB1/IL6/IL10/HIF1A/PGF/VEGFA/SMAD1	13
GO:0002685	regulation of leukocyte migration	0.15942	218/18800	4.00557e-10	1.92126e-08	7.67726e-09	MAPK1/HMOX1/LBP/SERPINE1/MAPK3/IL1A/ICAM1/HMGB1/IL6/PGF/VEGFA	11
GO:0010038	response to metal ion	0.188406	351/18800	4.04537e-10	1.92126e-08	7.67726e-09	ERCC1/MAPK1/HMOX1/MAPK3/IL1A/EGFR/FOS/CASP3/CASP9/MMP9/BCL2/HIF1A/NEDD4L	13
GO:1901342	regulation of vasculature development	0.188406	351/18800	4.04537e-10	1.92126e-08	7.67726e-09	HMOX1/HGF/SERPINE1/IL1A/STAT3/ERBB2/CTNNB1/IL6/IL10/HIF1A/PGF/VEGFA/SMAD1	13
GO:0048872	homeostasis of number of cells	0.173913	282/18800	4.23179e-10	1.98108e-08	7.91631e-09	HMOX1/BMP4/STAT3/RB1/BAX/STAT5B/CASP3/HMGB1/BCL2/IL6/HIF1A/VEGFA	12
GO:1904019	epithelial cell apoptotic process	0.130435	118/18800	4.58724e-10	2.11724e-08	8.46037e-09	HMOX1/SERPINE1/ICAM1/RB1/BCL2L1/CFLAR/IL6/IL10/PPARA	9
GO:1901653	cellular response to peptide	0.188406	361/18800	5.70318e-10	2.59574e-08	1.03724e-08	NGFR/CDC6/PLAT/NFKB1/STAT3/ICAM1/RB1/STAT5B/INSR/UCP2/CFLAR/GSK3B/PRKCD	13
GO:1902041	regulation of extrinsic apoptotic signaling pathway via death domain receptors	0.101449	50/18800	5.78497e-10	2.5969e-08	1.03771e-08	HMOX1/HGF/SERPINE1/ICAM1/BCL2L1/CFLAR/GSK3B	7
GO:0032355	response to estradiol	0.130435	123/18800	6.65504e-10	2.9471e-08	1.17765e-08	TGFB1/STAT3/EGFR/STAT5B/CASP3/CFLAR/CASP9/CTNNB1/IL10	9
GO:0097193	intrinsic apoptotic signaling pathway	0.173913	295/18800	7.07992e-10	3.09345e-08	1.23613e-08	HMOX1/BAX/BCL2L1/CASP3/CASP9/MCL1/MMP9/BCL2/CDKN1A/HIF1A/PRKCD/BBC3	12
GO:0033002	muscle cell proliferation	0.15942	233/18800	8.11459e-10	3.49888e-08	1.39814e-08	HMOX1/TGFB1/BMP4/PPARD/CFLAR/CTNNB1/MMP9/CDKN1A/IL6/IL10/SMAD1	11
GO:0042542	response to hydrogen peroxide	0.130435	128/18800	9.5024e-10	4.04408e-08	1.61599e-08	HMOX1/HGF/TRPA1/CASP3/MET/BCL2/IL6/IL10/PRKCD	9
GO:0034644	cellular response to UV	0.115942	88/18800	1.10358e-09	4.63645e-08	1.8527e-08	ERCC1/TIMP1/BAX/MMP3/CASP9/MMP9/CDKN1A/PRKCD	8
GO:0045766	positive regulation of angiogenesis	0.144928	183/18800	1.23475e-09	5.05783e-08	2.02108e-08	HMOX1/HGF/SERPINE1/IL1A/STAT3/IL10/HIF1A/PGF/VEGFA/SMAD1	10
GO:1904018	positive regulation of vasculature development	0.144928	183/18800	1.23475e-09	5.05783e-08	2.02108e-08	HMOX1/HGF/SERPINE1/IL1A/STAT3/IL10/HIF1A/PGF/VEGFA/SMAD1	10
GO:0001836	release of cytochrome c from mitochondria	0.101449	56/18800	1.32009e-09	5.34066e-08	2.1341e-08	BIK/HGF/BAX/BCL2L1/MMP9/BCL2/BBC3	7
GO:0007565	female pregnancy	0.144928	185/18800	1.37242e-09	5.48466e-08	2.19164e-08	TIMP1/STAT5B/FOS/PPARD/UCP2/MMP9/SPP1/BCL2/PGF/VEGFA	10
GO:0060326	cell chemotaxis	0.173913	315/18800	1.49154e-09	5.88888e-08	2.35317e-08	MAPK1/LBP/HGF/SERPINE1/MAPK3/MET/HMGB1/IL6/IL10/PGF/VEGFA/PRKCD	12
GO:1901654	response to ketone	0.144928	190/18800	1.77807e-09	6.9366e-08	2.77183e-08	PLAT/TGFB1/AHR/UCP1/BCL2L1/PRKCE/FOS/CFLAR/CASP9/SPP1	10
GO:0002690	positive regulation of leukocyte chemotaxis	0.115942	94/18800	1.87831e-09	7.24142e-08	2.89364e-08	MAPK1/LBP/SERPINE1/MAPK3/HMGB1/IL6/PGF/VEGFA	8
GO:0046686	response to cadmium ion	0.101449	59/18800	1.92508e-09	7.33544e-08	2.93121e-08	ERCC1/MAPK1/HMOX1/MAPK3/EGFR/FOS/MMP9	7
GO:0016049	cell growth	0.202899	484/18800	1.97292e-09	7.43135e-08	2.96953e-08	VCL/TGFB1/RB1/ERBB2/EGFR/PPARD/GSK3B/CTNNB1/SPP1/BCL2/CDKN1A/VEGFA/PPARA/NEDD4L	14
GO:0048638	regulation of developmental growth	0.173913	329/18800	2.43785e-09	9.0782e-08	3.62761e-08	BMP4/STAT3/STAT5B/INSR/PPARD/GSK3B/SPP1/BCL2/CDKN1A/VEGFA/PPARA/NEDD4L	12
GO:0061448	connective tissue development	0.15942	260/18800	2.57376e-09	9.47666e-08	3.78683e-08	TIMP1/TGFB1/BMP4/MMP13/MAPK3/RB1/PPARD/CFLAR/CTNNB1/HIF1A/SMAD1	11
GO:0033135	regulation of peptidyl-serine phosphorylation	0.130435	144/18800	2.70601e-09	9.85289e-08	3.93717e-08	TGFB1/HGF/EGFR/NTRK2/BAX/BCL2/IL6/VEGFA/TBK1	9
GO:2000377	regulation of reactive oxygen species metabolic process	0.130435	147/18800	3.24691e-09	1.16925e-07	4.67225e-08	TGFB1/UCP1/MMP3/CFLAR/BCL2/CDKN1A/HIF1A/PPARA/PRKCD	9
GO:0032963	collagen metabolic process	0.115942	101/18800	3.34177e-09	1.19032e-07	4.75647e-08	TGFB1/BMP4/MMP13/MMP3/PPARD/MMP9/IL6/HIF1A	8
GO:0090594	inflammatory response to wounding	0.0724638	17/18800	3.43618e-09	1.21079e-07	4.83826e-08	HMOX1/TIMP1/TGFB1/IL1A/HIF1A	5
GO:0042098	T cell proliferation	0.144928	204/18800	3.53632e-09	1.23282e-07	4.9263e-08	BMP4/IL1A/ERBB2/BAX/STAT5B/CASP3/CTNNB1/HMGB1/IL6/IL10	10
GO:0044703	multi-organism reproductive process	0.144928	205/18800	3.70701e-09	1.27872e-07	5.10972e-08	TIMP1/STAT5B/FOS/PPARD/UCP2/MMP9/SPP1/BCL2/PGF/VEGFA	10
GO:0071276	cellular response to cadmium ion	0.0869565	37/18800	4.16027e-09	1.42013e-07	5.67475e-08	MAPK1/HMOX1/MAPK3/EGFR/FOS/MMP9	6
GO:1901215	negative regulation of neuron death	0.144928	209/18800	4.46521e-09	1.5085e-07	6.02791e-08	HMOX1/NTRK2/BAX/BCL2L1/GSK3B/CTNNB1/BCL2/IL10/HIF1A/PPARA	10
GO:1903131	mononuclear cell differentiation	0.188406	433/18800	5.14027e-09	1.71884e-07	6.86841e-08	RELB/BMP4/IL1A/STAT3/ERBB2/BAX/STAT5B/CTNNB1/HMGB1/BCL2/IL6/IL10/VEGFA	13
GO:0008637	apoptotic mitochondrial changes	0.115942	107/18800	5.29704e-09	1.75337e-07	7.00639e-08	BIK/HGF/BAX/BCL2L1/GSK3B/MMP9/BCL2/BBC3	8
GO:0044706	multi-multicellular organism process	0.144928	213/18800	5.35791e-09	1.75579e-07	7.01605e-08	TIMP1/STAT5B/FOS/PPARD/UCP2/MMP9/SPP1/BCL2/PGF/VEGFA	10
GO:0007548	sex differentiation	0.15942	281/18800	5.78959e-09	1.87846e-07	7.50626e-08	ERCC1/BIK/IL1A/BAX/STAT5B/BCL2L1/INSR/CASP3/CTNNB1/BCL2/VEGFA	11
GO:0032103	positive regulation of response to external stimulus	0.188406	442/18800	6.57301e-09	2.11174e-07	8.43841e-08	MAPK1/NFKBIA/LBP/TGFB1/SERPINE1/MAPK3/STAT5B/MET/HMGB1/IL6/PGF/VEGFA/TBK1	13
GO:0002366	leukocyte activation involved in immune response	0.15942	285/18800	6.70556e-09	2.13341e-07	8.525e-08	ERCC1/HMOX1/LBP/RELB/TGFB1/STAT3/ICAM1/PRKCE/HMGB1/IL6/IL10	11
GO:0001938	positive regulation of endothelial cell proliferation	0.115942	111/18800	7.09276e-09	2.2349e-07	8.93055e-08	HMOX1/BMP4/STAT3/HMGB1/IL10/HIF1A/PGF/VEGFA	8
GO:0002263	cell activation involved in immune response	0.15942	289/18800	7.74901e-09	2.41843e-07	9.66393e-08	ERCC1/HMOX1/LBP/RELB/TGFB1/STAT3/ICAM1/PRKCE/HMGB1/IL6/IL10	11
GO:0046661	male sex differentiation	0.130435	164/18800	8.49867e-09	2.62737e-07	1.04989e-07	ERCC1/BIK/IL1A/BAX/STAT5B/BCL2L1/INSR/CTNNB1/BCL2	9
GO:0051100	negative regulation of binding	0.130435	165/18800	8.96308e-09	2.74505e-07	1.09691e-07	HMOX1/NFKBIA/MAPK3/BAX/GSK3B/CDKN1A/IL10/PPARA/PRKCD	9
GO:0050920	regulation of chemotaxis	0.144928	225/18800	9.05927e-09	2.74882e-07	1.09841e-07	MAPK1/LBP/TGFB1/SERPINE1/MAPK3/MET/HMGB1/IL6/PGF/VEGFA	10
GO:0071375	cellular response to peptide hormone stimulus	0.15942	294/18800	9.25613e-09	2.78278e-07	1.11199e-07	CDC6/PLAT/NFKB1/STAT3/RB1/STAT5B/INSR/UCP2/CFLAR/GSK3B/PRKCD	11
GO:1903706	regulation of hemopoiesis	0.173913	371/18800	9.36541e-09	2.79004e-07	1.11489e-07	NFKBIA/TGFB1/BMP4/STAT3/RB1/ERBB2/STAT5B/FOS/CTNNB1/HMGB1/IL10/HIF1A	12
GO:0008406	gonad development	0.144928	226/18800	9.45149e-09	2.79032e-07	1.115e-07	ERCC1/BIK/IL1A/BAX/STAT5B/BCL2L1/INSR/CASP3/BCL2/VEGFA	10
GO:0071900	regulation of protein serine/threonine kinase activity	0.173913	372/18800	9.65018e-09	2.82354e-07	1.12827e-07	CDC6/TGFB1/BMP4/RB1/ERBB2/EGFR/HMGCR/INSR/CASP3/CDKN1A/VEGFA/PRKCD	12
GO:0018108	peptidyl-tyrosine phosphorylation	0.173913	373/18800	9.94272e-09	2.88339e-07	1.15219e-07	TGFB1/HGF/MAPK3/ERBB2/EGFR/NTRK2/INSR/PRKCE/MET/IL6/VEGFA/PRKCD	12
GO:0097529	myeloid leukocyte migration	0.144928	229/18800	1.07199e-08	3.08151e-07	1.23136e-07	MAPK1/LBP/SERPINE1/MAPK3/IL1A/STAT5B/HMGB1/IL6/PGF/VEGFA	10
GO:0018212	peptidyl-tyrosine modification	0.173913	376/18800	1.08689e-08	3.09715e-07	1.23761e-07	TGFB1/HGF/MAPK3/ERBB2/EGFR/NTRK2/INSR/PRKCE/MET/IL6/VEGFA/PRKCD	12
GO:0048660	regulation of smooth muscle cell proliferation	0.130435	170/18800	1.16348e-08	3.26221e-07	1.30356e-07	HMOX1/TGFB1/BMP4/PPARD/CTNNB1/MMP9/CDKN1A/IL6/IL10	9
GO:0045137	development of primary sexual characteristics	0.144928	231/18800	1.16472e-08	3.26221e-07	1.30356e-07	ERCC1/BIK/IL1A/BAX/STAT5B/BCL2L1/INSR/CASP3/BCL2/VEGFA	10
GO:1903201	regulation of oxidative stress-induced cell death	0.101449	77/18800	1.2882e-08	3.5682e-07	1.42584e-07	HGF/MMP3/MET/CTNNB1/MCL1/IL10/HIF1A	7
GO:0030098	lymphocyte differentiation	0.173913	382/18800	1.29575e-08	3.5682e-07	1.42584e-07	RELB/BMP4/IL1A/STAT3/ERBB2/BAX/STAT5B/CTNNB1/HMGB1/BCL2/IL6/IL10	12
GO:0048659	smooth muscle cell proliferation	0.130435	173/18800	1.35526e-08	3.701e-07	1.4789e-07	HMOX1/TGFB1/BMP4/PPARD/CTNNB1/MMP9/CDKN1A/IL6/IL10	9
GO:0071482	cellular response to light stimulus	0.115942	121/18800	1.40416e-08	3.7967e-07	1.51714e-07	ERCC1/TIMP1/BAX/MMP3/CASP9/MMP9/CDKN1A/PRKCD	8
GO:0010634	positive regulation of epithelial cell migration	0.130435	174/18800	1.42507e-08	3.7967e-07	1.51714e-07	HMOX1/TGFB1/BMP4/PRKCE/MET/HMGB1/MMP9/HIF1A/VEGFA	9
GO:0042129	regulation of T cell proliferation	0.130435	174/18800	1.42507e-08	3.7967e-07	1.51714e-07	BMP4/IL1A/ERBB2/STAT5B/CASP3/CTNNB1/HMGB1/IL6/IL10	9
GO:0001819	positive regulation of cytokine production	0.188406	475/18800	1.54661e-08	4.0873e-07	1.63326e-07	HMOX1/LBP/TGFB1/HGF/SERPINE1/IL1A/STAT3/STAT5B/HMGB1/IL6/IL10/HIF1A/TBK1	13
GO:0022612	gland morphogenesis	0.115942	123/18800	1.59796e-08	4.1892e-07	1.67399e-07	TGFB1/HGF/BMP4/EGFR/BAX/CFLAR/BCL2/IL6	8
GO:0090199	regulation of release of cytochrome c from mitochondria	0.0869565	46/18800	1.63339e-08	4.24811e-07	1.69752e-07	BIK/HGF/BAX/BCL2L1/MMP9/BBC3	6
GO:0002688	regulation of leukocyte chemotaxis	0.115942	124/18800	1.70323e-08	4.37227e-07	1.74714e-07	MAPK1/LBP/SERPINE1/MAPK3/HMGB1/IL6/PGF/VEGFA	8
GO:0009991	response to extracellular stimulus	0.188406	479/18800	1.70781e-08	4.37227e-07	1.74714e-07	ERCC1/MAPK1/HMOX1/UCP1/MAPK3/IL1A/FOS/PPARD/UCP2/SPP1/BCL2/CDKN1A/PPARA	13
GO:0001936	regulation of endothelial cell proliferation	0.130435	178/18800	1.73678e-08	4.41196e-07	1.763e-07	NGFR/HMOX1/BMP4/STAT3/HMGB1/IL10/HIF1A/PGF/VEGFA	9
GO:0070849	response to epidermal growth factor	0.0869565	47/18800	1.86705e-08	4.70639e-07	1.88065e-07	MAPK1/MAPK3/ERBB2/EGFR/STAT5B/CFLAR	6
GO:0009266	response to temperature stimulus	0.130435	180/18800	1.91389e-08	4.78766e-07	1.91312e-07	NGFR/HMOX1/NFKBIA/TRPA1/UCP1/IL1A/FOS/UCP2/GSK3B	9
GO:0042593	glucose homeostasis	0.144928	244/18800	1.96068e-08	4.83093e-07	1.93042e-07	NGFR/STAT3/ICAM1/INSR/PRKCE/PPARD/UCP2/CRTC2/IL6/HIF1A	10
GO:0048762	mesenchymal cell differentiation	0.144928	244/18800	1.96068e-08	4.83093e-07	1.93042e-07	MAPK1/TGFB1/HGF/BMP4/MAPK3/GSK3B/CTNNB1/BCL2/IL6/HIF1A	10
GO:0033500	carbohydrate homeostasis	0.144928	245/18800	2.03824e-08	4.98457e-07	1.99181e-07	NGFR/STAT3/ICAM1/INSR/PRKCE/PPARD/UCP2/CRTC2/IL6/HIF1A	10
GO:2000637	positive regulation of miRNA-mediated gene silencing	0.0724638	24/18800	2.31377e-08	5.61647e-07	2.24432e-07	TGFB1/BMP4/STAT3/EGFR/IL6	5
GO:0097194	execution phase of apoptosis	0.101449	84/18800	2.37768e-08	5.72915e-07	2.28934e-07	BAX/BCL2L1/CASP3/CFLAR/CASP9/IL6/BBC3	7
GO:0035094	response to nicotine	0.0869565	49/18800	2.41756e-08	5.78273e-07	2.31075e-07	MAPK1/HMOX1/NFKB1/CASP3/BCL2/PPARA	6
GO:0051223	regulation of protein transport	0.188406	495/18800	2.51593e-08	5.93658e-07	2.37223e-07	TGFB1/BMP4/IL1A/ERBB2/HMGCR/PRKCE/PPARD/UCP2/GSK3B/IL6/HIF1A/PRKCD/BBC3	13
GO:0009895	negative regulation of catabolic process	0.15942	324/18800	2.51811e-08	5.93658e-07	2.37223e-07	HMOX1/TIMP1/HGF/STAT3/EGFR/HMGCR/MET/MCL1/BCL2/IL10/PPARA	11
GO:0010507	negative regulation of autophagy	0.101449	85/18800	2.58358e-08	6.04742e-07	2.41652e-07	HMOX1/HGF/STAT3/MET/MCL1/BCL2/IL10	7
GO:0071478	cellular response to radiation	0.130435	187/18800	2.66452e-08	6.19265e-07	2.47455e-07	ERCC1/TIMP1/BAX/MMP3/BCL2L1/CASP9/MMP9/CDKN1A/PRKCD	9
GO:0060148	positive regulation of post-transcriptional gene silencing	0.0724638	25/18800	2.88402e-08	6.60904e-07	2.64094e-07	TGFB1/BMP4/STAT3/EGFR/IL6	5
GO:1900370	positive regulation of post-transcriptional gene silencing by RNA	0.0724638	25/18800	2.88402e-08	6.60904e-07	2.64094e-07	TGFB1/BMP4/STAT3/EGFR/IL6	5
GO:0034101	erythrocyte homeostasis	0.115942	133/18800	2.95332e-08	6.72084e-07	2.68562e-07	HMOX1/BMP4/STAT3/RB1/STAT5B/CASP3/HIF1A/VEGFA	8
GO:1901216	positive regulation of neuron death	0.101449	87/18800	3.04096e-08	6.87258e-07	2.74625e-07	BAX/FOS/CASP3/GSK3B/CASP9/CTNNB1/MCL1	7
GO:0001558	regulation of cell growth	0.173913	415/18800	3.234e-08	7.25878e-07	2.90057e-07	TGFB1/RB1/ERBB2/EGFR/PPARD/GSK3B/SPP1/BCL2/CDKN1A/VEGFA/PPARA/NEDD4L	12
GO:0060439	trachea morphogenesis	0.057971	10/18800	3.43151e-08	7.6497e-07	3.05679e-07	MAPK1/BMP4/MAPK3/CTNNB1	4
GO:0035196	production of miRNAs involved in gene silencing by miRNA	0.0869565	52/18800	3.4894e-08	7.67434e-07	3.06663e-07	TGFB1/BMP4/STAT3/EGFR/IL6/SMAD1	6
GO:1904036	negative regulation of epithelial cell apoptotic process	0.0869565	52/18800	3.4894e-08	7.67434e-07	3.06663e-07	HMOX1/SERPINE1/ICAM1/RB1/CFLAR/PPARA	6
GO:0070371	ERK1 and ERK2 cascade	0.15942	335/18800	3.54314e-08	7.73702e-07	3.09168e-07	MAPK1/TGFB1/BMP4/MAPK3/IL1A/ICAM1/ERBB2/EGFR/CFLAR/HMGB1/YWHAZ	11
GO:0001776	leukocyte homeostasis	0.101449	89/18800	3.56512e-08	7.73702e-07	3.09168e-07	BAX/STAT5B/CASP3/HMGB1/BCL2/IL6/HIF1A	7
GO:0042113	B cell activation	0.15942	336/18800	3.6526e-08	7.84111e-07	3.13327e-07	ERCC1/TGFB1/AHR/BAX/STAT5B/CASP3/BCL2/CDKN1A/IL6/IL10/PRKCD	11
GO:0001935	endothelial cell proliferation	0.130435	194/18800	3.66094e-08	7.84111e-07	3.13327e-07	NGFR/HMOX1/BMP4/STAT3/HMGB1/IL10/HIF1A/PGF/VEGFA	9
GO:0051216	cartilage development	0.130435	195/18800	3.82702e-08	8.1436e-07	3.25414e-07	TIMP1/TGFB1/BMP4/MMP13/MAPK3/RB1/CTNNB1/HIF1A/SMAD1	9
GO:0030217	T cell differentiation	0.144928	263/18800	3.98362e-08	8.40181e-07	3.35732e-07	RELB/BMP4/IL1A/STAT3/ERBB2/STAT5B/CTNNB1/HMGB1/BCL2/IL6	10
GO:0043393	regulation of protein binding	0.130435	196/18800	3.99964e-08	8.40181e-07	3.35732e-07	BMP4/MAPK3/BAX/GSK3B/MMP9/CDKN1A/IL10/PPARA/PRKCD	9
GO:0051384	response to glucocorticoid	0.115942	139/18800	4.17036e-08	8.70464e-07	3.47833e-07	PLAT/FOS/CASP3/CFLAR/CASP9/BCL2/IL6/IL10	8
GO:0052548	regulation of endopeptidase activity	0.173913	426/18800	4.30849e-08	8.93603e-07	3.5708e-07	NGFR/TIMP1/HGF/SERPINE1/STAT3/BAX/CFLAR/CASP9/HMGB1/MMP9/VEGFA/BBC3	12
GO:0090596	sensory organ morphogenesis	0.144928	266/18800	4.4325e-08	9.13541e-07	3.65047e-07	MAPK1/BMP4/MAPK3/STAT3/NTRK2/BAX/CTNNB1/BCL2/HIF1A/VEGFA	10
GO:1900407	regulation of cellular response to oxidative stress	0.101449	92/18800	4.49369e-08	9.20364e-07	3.67773e-07	HGF/MMP3/MET/CTNNB1/MCL1/IL10/HIF1A	7
GO:0022408	negative regulation of cell-cell adhesion	0.130435	199/18800	4.55901e-08	9.27942e-07	3.70801e-07	TGFB1/BMP4/ERBB2/CASP3/HMGB1/IL10/VEGFA/PPARA/PRKCD	9
GO:0030336	negative regulation of cell migration	0.15942	346/18800	4.92477e-08	9.90354e-07	3.95741e-07	NGFR/CHRD/VCL/HMOX1/TIMP1/TGFB1/SERPINE1/STAT3/PPARD/HMGB1/BCL2	11
GO:1904645	response to amyloid-beta	0.0869565	55/18800	4.92608e-08	9.90354e-07	3.95741e-07	NGFR/MMP13/ICAM1/MMP3/GSK3B/MMP9	6
GO:1901655	cellular response to ketone	0.101449	94/18800	5.22018e-08	1.03676e-06	4.14284e-07	PLAT/AHR/UCP1/PRKCE/CFLAR/CASP9/SPP1	7
GO:1904035	regulation of epithelial cell apoptotic process	0.101449	94/18800	5.22018e-08	1.03676e-06	4.14284e-07	HMOX1/SERPINE1/ICAM1/RB1/CFLAR/IL6/PPARA	7
GO:0070918	primary sncRNA processing	0.0869565	56/18800	5.50137e-08	1.08602e-06	4.3397e-07	TGFB1/BMP4/STAT3/EGFR/IL6/SMAD1	6
GO:0043281	regulation of cysteine-type endopeptidase activity involved in apoptotic process	0.130435	204/18800	5.64385e-08	1.10748e-06	4.42543e-07	NGFR/HGF/BAX/CFLAR/CASP9/HMGB1/MMP9/VEGFA/BBC3	9
GO:0032091	negative regulation of protein binding	0.101449	96/18800	6.04361e-08	1.17886e-06	4.71068e-07	MAPK3/BAX/GSK3B/CDKN1A/IL10/PPARA/PRKCD	7
GO:0045936	negative regulation of phosphate metabolic process	0.173913	440/18800	6.13402e-08	1.18942e-06	4.75287e-07	TGFB1/HGF/BMP4/STAT3/RB1/HMGCR/BAX/CASP3/GSK3B/CDKN1A/PPARA/PRKCD	12
GO:0010563	negative regulation of phosphorus metabolic process	0.173913	441/18800	6.28771e-08	1.21205e-06	4.84329e-07	TGFB1/HGF/BMP4/STAT3/RB1/HMGCR/BAX/CASP3/GSK3B/CDKN1A/PPARA/PRKCD	12
GO:0010821	regulation of mitochondrion organization	0.115942	148/18800	6.79755e-08	1.30266e-06	5.20539e-07	BIK/HGF/BAX/BCL2L1/GSK3B/MMP9/HIF1A/BBC3	8
GO:0031667	response to nutrient levels	0.173913	446/18800	7.10914e-08	1.35446e-06	5.41235e-07	ERCC1/MAPK1/HMOX1/UCP1/MAPK3/IL1A/PPARD/UCP2/SPP1/BCL2/CDKN1A/PPARA	12
GO:2000146	negative regulation of cell motility	0.15942	361/18800	7.57564e-08	1.43499e-06	5.73416e-07	NGFR/CHRD/VCL/HMOX1/TIMP1/TGFB1/SERPINE1/STAT3/PPARD/HMGB1/BCL2	11
GO:0042100	B cell proliferation	0.101449	100/18800	8.02329e-08	1.50628e-06	6.01901e-07	AHR/BAX/CASP3/BCL2/CDKN1A/IL10/PRKCD	7
GO:1903800	positive regulation of production of miRNAs involved in gene silencing by miRNA	0.057971	12/18800	8.04389e-08	1.50628e-06	6.01901e-07	TGFB1/BMP4/EGFR/IL6	4
GO:0008630	intrinsic apoptotic signaling pathway in response to DNA damage	0.101449	101/18800	8.59589e-08	1.59145e-06	6.35937e-07	HMOX1/BAX/BCL2L1/CASP9/MCL1/BCL2/CDKN1A	7
GO:1902882	regulation of response to oxidative stress	0.101449	101/18800	8.59589e-08	1.59145e-06	6.35937e-07	HGF/MMP3/MET/CTNNB1/MCL1/IL10/HIF1A	7
GO:0022407	regulation of cell-cell adhesion	0.173913	456/18800	9.04615e-08	1.6561e-06	6.61771e-07	TGFB1/BMP4/IL1A/ERBB2/STAT5B/CASP3/HMGB1/IL6/IL10/VEGFA/PPARA/PRKCD	12
GO:0052547	regulation of peptidase activity	0.173913	456/18800	9.04615e-08	1.6561e-06	6.61771e-07	NGFR/TIMP1/HGF/SERPINE1/STAT3/BAX/CFLAR/CASP9/HMGB1/MMP9/VEGFA/BBC3	12
GO:0048592	eye morphogenesis	0.115942	154/18800	9.25114e-08	1.68422e-06	6.73007e-07	BMP4/STAT3/NTRK2/BAX/CTNNB1/BCL2/HIF1A/VEGFA	8
GO:0051271	negative regulation of cellular component movement	0.15942	369/18800	9.45477e-08	1.71178e-06	6.8402e-07	NGFR/CHRD/VCL/HMOX1/TIMP1/TGFB1/SERPINE1/STAT3/PPARD/HMGB1/BCL2	11
GO:1905952	regulation of lipid localization	0.115942	155/18800	9.72642e-08	1.75129e-06	6.99807e-07	NFKBIA/NFKB1/IL1A/PPARD/SPP1/IL6/PPARA/PRKCD	8
GO:0031663	lipopolysaccharide-mediated signaling pathway	0.0869565	62/18800	1.02379e-07	1.83332e-06	7.32585e-07	MAPK1/NFKBIA/LBP/TGFB1/MAPK3/PRKCE	6
GO:0030856	regulation of epithelial cell differentiation	0.115942	157/18800	1.07403e-07	1.90248e-06	7.60222e-07	VCL/SERPINE1/BMP4/IL1A/STAT5B/CTNNB1/MMP9/VEGFA	8
GO:0031960	response to corticosteroid	0.115942	157/18800	1.07403e-07	1.90248e-06	7.60222e-07	PLAT/FOS/CASP3/CFLAR/CASP9/BCL2/IL6/IL10	8
GO:0071241	cellular response to inorganic substance	0.130435	221/18800	1.11987e-07	1.96627e-06	7.85712e-07	MAPK1/HMOX1/MAPK3/CDK2/EGFR/MMP3/FOS/CFLAR/MMP9	9
GO:0008585	female gonad development	0.101449	105/18800	1.12444e-07	1.96627e-06	7.85712e-07	BAX/STAT5B/BCL2L1/INSR/CASP3/BCL2/VEGFA	7
GO:0070665	positive regulation of leukocyte proliferation	0.115942	158/18800	1.12804e-07	1.96627e-06	7.85712e-07	MAPK1/MAPK3/IL1A/STAT5B/HMGB1/BCL2/CDKN1A/IL6	8
GO:0050918	positive chemotaxis	0.0869565	64/18800	1.24146e-07	2.15252e-06	8.60138e-07	HGF/BMP4/MET/HMGB1/PGF/VEGFA	6
GO:0033138	positive regulation of peptidyl-serine phosphorylation	0.101449	107/18800	1.2808e-07	2.20903e-06	8.8272e-07	TGFB1/EGFR/NTRK2/BCL2/IL6/VEGFA/TBK1	7
GO:0042326	negative regulation of phosphorylation	0.15942	382/18800	1.34012e-07	2.29925e-06	9.18769e-07	TGFB1/HGF/BMP4/STAT3/RB1/HMGCR/BAX/CASP3/CDKN1A/PPARA/PRKCD	11
GO:0031100	animal organ regeneration	0.0869565	65/18800	1.36378e-07	2.32767e-06	9.30125e-07	HMOX1/HGF/UCP2/IL6/IL10/PGF	6
GO:0060485	mesenchyme development	0.144928	301/18800	1.4077e-07	2.39017e-06	9.55099e-07	MAPK1/TGFB1/HGF/BMP4/MAPK3/GSK3B/CTNNB1/BCL2/IL6/HIF1A	10
GO:0046545	development of primary female sexual characteristics	0.101449	109/18800	1.45512e-07	2.44534e-06	9.77146e-07	BAX/STAT5B/BCL2L1/INSR/CASP3/BCL2/VEGFA	7
GO:0071887	leukocyte apoptotic process	0.101449	109/18800	1.45512e-07	2.44534e-06	9.77146e-07	BMP4/BAX/CASP3/CASP9/IL6/IL10/HIF1A	7
GO:0038034	signal transduction in absence of ligand	0.0869565	66/18800	1.49586e-07	2.48829e-06	9.94307e-07	IL1A/BAX/BCL2L1/GSK3B/MCL1/BCL2	6
GO:0097192	extrinsic apoptotic signaling pathway in absence of ligand	0.0869565	66/18800	1.49586e-07	2.48829e-06	9.94307e-07	IL1A/BAX/BCL2L1/GSK3B/MCL1/BCL2	6
GO:0007346	regulation of mitotic cell cycle	0.173913	478/18800	1.50587e-07	2.49229e-06	9.95906e-07	CDC6/BMP4/IL1A/CDK2/RB1/EGFR/STAT5B/INSR/CTNNB1/BCL2/CDKN1A/IL10	12
GO:2000116	regulation of cysteine-type endopeptidase activity	0.130435	229/18800	1.51585e-07	2.4962e-06	9.97471e-07	NGFR/HGF/BAX/CFLAR/CASP9/HMGB1/MMP9/VEGFA/BBC3	9
GO:0007162	negative regulation of cell adhesion	0.144928	305/18800	1.59116e-07	2.60711e-06	1.04179e-06	TGFB1/SERPINE1/BMP4/ERBB2/CASP3/HMGB1/IL10/VEGFA/PPARA/PRKCD	10
GO:0070141	response to UV-A	0.057971	14/18800	1.61767e-07	2.63737e-06	1.05388e-06	TIMP1/EGFR/MMP3/MMP9	4
GO:0072593	reactive oxygen species metabolic process	0.130435	231/18800	1.63208e-07	2.64769e-06	1.058e-06	TGFB1/UCP1/MMP3/CFLAR/BCL2/CDKN1A/HIF1A/PPARA/PRKCD	9
GO:0070372	regulation of ERK1 and ERK2 cascade	0.144928	311/18800	1.90581e-07	3.07653e-06	1.22937e-06	TGFB1/BMP4/MAPK3/IL1A/ICAM1/ERBB2/EGFR/CFLAR/HMGB1/YWHAZ	10
GO:0040013	negative regulation of locomotion	0.15942	396/18800	1.92281e-07	3.08874e-06	1.23425e-06	NGFR/CHRD/VCL/HMOX1/TIMP1/TGFB1/SERPINE1/STAT3/PPARD/HMGB1/BCL2	11
GO:0030595	leukocyte chemotaxis	0.130435	236/18800	1.95721e-07	3.12868e-06	1.2502e-06	MAPK1/LBP/SERPINE1/MAPK3/HMGB1/IL6/IL10/PGF/VEGFA	9
GO:0051099	positive regulation of binding	0.115942	171/18800	2.07364e-07	3.29869e-06	1.31814e-06	TGFB1/BMP4/RB1/MET/GSK3B/CTNNB1/HMGB1/MMP9	8
GO:0043254	regulation of protein-containing complex assembly	0.15942	401/18800	2.17983e-07	3.45087e-06	1.37895e-06	BIK/TGFB1/RB1/BAX/MMP3/PRKCE/MET/GSK3B/HMGB1/VEGFA/PRKCD	11
GO:0048771	tissue remodeling	0.115942	174/18800	2.36946e-07	3.73304e-06	1.49171e-06	TIMP1/TGFB1/IL1A/BAX/CTNNB1/SPP1/IL6/HIF1A	8
GO:0060284	regulation of cell development	0.173913	500/18800	2.44219e-07	3.82921e-06	1.53014e-06	VCL/TGFB1/BMP4/IL1A/NTRK2/GSK3B/CTNNB1/SPP1/BCL2/IL6/HIF1A/VEGFA	12
GO:0045926	negative regulation of growth	0.130435	245/18800	2.68611e-07	4.17175e-06	1.66701e-06	TGFB1/BMP4/RB1/PPARD/SPP1/BCL2/CDKN1A/HIF1A/PPARA	9
GO:0051403	stress-activated MAPK cascade	0.130435	245/18800	2.68611e-07	4.17175e-06	1.66701e-06	MAPK1/HGF/NFKB1/BMP4/MAPK3/IL1A/EGFR/HMGB1/VEGFA	9
GO:0009410	response to xenobiotic stimulus	0.15942	411/18800	2.78695e-07	4.30795e-06	1.72143e-06	HMOX1/AHR/TRPA1/RB1/UGT1A6/FOS/CASP3/CTNNB1/BCL2/IL10/PGF	11
GO:0034349	glial cell apoptotic process	0.057971	16/18800	2.92498e-07	4.50008e-06	1.79821e-06	RB1/CASP3/CASP9/PRKCD	4
GO:0051101	regulation of DNA binding	0.101449	121/18800	2.97831e-07	4.56071e-06	1.82244e-06	HMOX1/NFKBIA/TGFB1/RB1/CTNNB1/HMGB1/MMP9	7
GO:0010822	positive regulation of mitochondrion organization	0.0869565	75/18800	3.23042e-07	4.92376e-06	1.96751e-06	BIK/BAX/GSK3B/MMP9/HIF1A/BBC3	6
GO:0051235	maintenance of location	0.144928	331/18800	3.3855e-07	5.13624e-06	2.05242e-06	NFKBIA/NFKB1/TRPA1/BAX/STAT5B/PRKCE/PPARD/IL6/IL10/PPARA	10
GO:0031098	stress-activated protein kinase signaling cascade	0.130435	252/18800	3.40614e-07	5.14375e-06	2.05542e-06	MAPK1/HGF/NFKB1/BMP4/MAPK3/IL1A/EGFR/HMGB1/VEGFA	9
GO:0006109	regulation of carbohydrate metabolic process	0.115942	183/18800	3.48408e-07	5.21339e-06	2.08325e-06	TGFB1/NFKB1/STAT3/INSR/PRKCE/GSK3B/HIF1A/PPARA	8
GO:0043405	regulation of MAP kinase activity	0.115942	183/18800	3.48408e-07	5.21339e-06	2.08325e-06	TGFB1/BMP4/ERBB2/EGFR/HMGCR/INSR/VEGFA/PRKCD	8
GO:0030218	erythrocyte differentiation	0.101449	124/18800	3.52004e-07	5.21954e-06	2.0857e-06	BMP4/STAT3/RB1/STAT5B/CASP3/HIF1A/VEGFA	7
GO:0046660	female sex differentiation	0.101449	124/18800	3.52004e-07	5.21954e-06	2.0857e-06	BAX/STAT5B/BCL2L1/INSR/CASP3/BCL2/VEGFA	7
GO:0033077	T cell differentiation in thymus	0.0869565	78/18800	4.0853e-07	6.03042e-06	2.40973e-06	BMP4/IL1A/ERBB2/STAT5B/CTNNB1/BCL2	6
GO:0060964	regulation of miRNA-mediated gene silencing	0.0724638	42/18800	4.40007e-07	6.44924e-06	2.57709e-06	TGFB1/BMP4/STAT3/EGFR/IL6	5
GO:0048145	regulation of fibroblast proliferation	0.0869565	79/18800	4.40839e-07	6.44924e-06	2.57709e-06	NGFR/CDC6/EGFR/BAX/CTNNB1/CDKN1A	6
GO:0060438	trachea development	0.057971	18/18800	4.89068e-07	7.09148e-06	2.83372e-06	MAPK1/BMP4/MAPK3/CTNNB1	4
GO:0097284	hepatocyte apoptotic process	0.057971	18/18800	4.89068e-07	7.09148e-06	2.83372e-06	RB1/BCL2L1/CFLAR/PPARA	4
GO:0010595	positive regulation of endothelial cell migration	0.101449	131/18800	5.11419e-07	7.3233e-06	2.92636e-06	HMOX1/TGFB1/BMP4/MET/HMGB1/HIF1A/VEGFA	7
GO:0031016	pancreas development	0.0869565	81/18800	5.11759e-07	7.3233e-06	2.92636e-06	BMP4/INSR/MET/GSK3B/CTNNB1/IL6	6
GO:0048144	fibroblast proliferation	0.0869565	81/18800	5.11759e-07	7.3233e-06	2.92636e-06	NGFR/CDC6/EGFR/BAX/CTNNB1/CDKN1A	6
GO:0031334	positive regulation of protein-containing complex assembly	0.115942	194/18800	5.4317e-07	7.73899e-06	3.09247e-06	BIK/TGFB1/BAX/MMP3/PRKCE/MET/GSK3B/VEGFA	8
GO:0060147	regulation of post-transcriptional gene silencing	0.0724638	44/18800	5.58557e-07	7.88962e-06	3.15265e-06	TGFB1/BMP4/STAT3/EGFR/IL6	5
GO:1900368	regulation of post-transcriptional gene silencing by RNA	0.0724638	44/18800	5.58557e-07	7.88962e-06	3.15265e-06	TGFB1/BMP4/STAT3/EGFR/IL6	5
GO:0001889	liver development	0.101449	134/18800	5.96289e-07	8.38643e-06	3.35118e-06	HMOX1/HGF/UCP2/CFLAR/MET/IL6/IL10	7
GO:0097709	connective tissue replacement	0.057971	19/18800	6.17774e-07	8.61466e-06	3.44238e-06	TIMP1/TGFB1/IL1A/HIF1A	4
GO:1902894	negative regulation of miRNA transcription	0.057971	19/18800	6.17774e-07	8.61466e-06	3.44238e-06	TGFB1/BMP4/PPARD/PPARA	4
GO:0010876	lipid localization	0.15942	446/18800	6.26072e-07	8.6567e-06	3.45918e-06	NFKBIA/LBP/NFKB1/ABCG2/IL1A/STAT5B/PPARD/SPP1/IL6/PPARA/PRKCD	11
GO:1903829	positive regulation of protein localization	0.15942	446/18800	6.26072e-07	8.6567e-06	3.45918e-06	NGFR/TGFB1/IL1A/ERBB2/EGFR/PRKCE/PPARD/GSK3B/HIF1A/PRKCD/BBC3	11
GO:0032872	regulation of stress-activated MAPK cascade	0.115942	198/18800	6.34037e-07	8.72999e-06	3.48846e-06	MAPK1/HGF/BMP4/MAPK3/IL1A/EGFR/HMGB1/VEGFA	8
GO:0008544	epidermis development	0.144928	355/18800	6.42201e-07	8.80541e-06	3.5186e-06	NGFR/BMP4/IL1A/EGFR/INSR/PPARD/CASP3/CTNNB1/BCL2/PPARA	10
GO:0031331	positive regulation of cellular catabolic process	0.15942	449/18800	6.68772e-07	9.13153e-06	3.64892e-06	HMOX1/MAPK3/BAX/INSR/GSK3B/HMGB1/IL6/HIF1A/PPARA/PRKCD/TBK1	11
GO:0050864	regulation of B cell activation	0.115942	200/18800	6.84145e-07	9.30267e-06	3.7173e-06	TGFB1/AHR/STAT5B/CASP3/BCL2/CDKN1A/IL6/IL10	8
GO:0061008	hepaticobiliary system development	0.101449	137/18800	6.92693e-07	9.34983e-06	3.73615e-06	HMOX1/HGF/UCP2/CFLAR/MET/IL6/IL10	7
GO:0010631	epithelial cell migration	0.144928	358/18800	6.9332e-07	9.34983e-06	3.73615e-06	HMOX1/TGFB1/BMP4/PRKCE/PPARD/MET/HMGB1/MMP9/HIF1A/VEGFA	10
GO:0060966	regulation of gene silencing by RNA	0.0724638	46/18800	7.01018e-07	9.41491e-06	3.76215e-06	TGFB1/BMP4/STAT3/EGFR/IL6	5
GO:0002285	lymphocyte activation involved in immune response	0.115942	201/18800	7.10444e-07	9.46393e-06	3.78174e-06	ERCC1/RELB/TGFB1/STAT3/ICAM1/HMGB1/IL6/IL10	8
GO:0070302	regulation of stress-activated protein kinase signaling cascade	0.115942	201/18800	7.10444e-07	9.46393e-06	3.78174e-06	MAPK1/HGF/BMP4/MAPK3/IL1A/EGFR/HMGB1/VEGFA	8
GO:0051090	regulation of DNA-binding transcription factor activity	0.15942	452/18800	7.14026e-07	9.47312e-06	3.78542e-06	HMOX1/NFKBIA/MAPK3/STAT3/RB1/CFLAR/CTNNB1/CRTC2/IL6/IL10/VEGFA	11
GO:0019915	lipid storage	0.0869565	86/18800	7.30798e-07	9.65656e-06	3.85871e-06	NFKBIA/NFKB1/STAT5B/PPARD/IL6/PPARA	6
GO:0090132	epithelium migration	0.144928	361/18800	7.47968e-07	9.84374e-06	3.93351e-06	HMOX1/TGFB1/BMP4/PRKCE/PPARD/MET/HMGB1/MMP9/HIF1A/VEGFA	10
GO:0002064	epithelial cell development	0.115942	203/18800	7.65643e-07	1.00361e-05	4.01036e-06	VCL/BMP4/IL1A/ICAM1/MET/GSK3B/HIF1A/VEGFA	8
GO:1905953	negative regulation of lipid localization	0.0724638	47/18800	7.8225e-07	1.01724e-05	4.06483e-06	NFKBIA/NFKB1/PPARD/IL6/PPARA	5
GO:2000378	negative regulation of reactive oxygen species metabolic process	0.0724638	47/18800	7.8225e-07	1.01724e-05	4.06483e-06	MMP3/CFLAR/BCL2/HIF1A/PPARA	5
GO:0001818	negative regulation of cytokine production	0.144928	363/18800	7.86463e-07	1.01867e-05	4.07056e-06	HMOX1/LBP/RELB/TGFB1/HGF/NFKB1/HMGB1/IL6/IL10/PPARA	10
GO:0008584	male gonad development	0.101449	140/18800	8.01862e-07	1.03453e-05	4.13392e-06	ERCC1/BIK/IL1A/BAX/BCL2L1/INSR/BCL2	7
GO:0046546	development of primary male sexual characteristics	0.101449	141/18800	8.41315e-07	1.08117e-05	4.32031e-06	ERCC1/BIK/IL1A/BAX/BCL2L1/INSR/BCL2	7
GO:0090130	tissue migration	0.144928	366/18800	8.47456e-07	1.08481e-05	4.33485e-06	HMOX1/TGFB1/BMP4/PRKCE/PPARD/MET/HMGB1/MMP9/HIF1A/VEGFA	10
GO:0010212	response to ionizing radiation	0.101449	142/18800	8.82384e-07	1.12076e-05	4.47852e-06	ERCC1/IL1A/BAX/BCL2L1/CASP3/BCL2/CDKN1A	7
GO:0055123	digestive system development	0.101449	142/18800	8.82384e-07	1.12076e-05	4.47852e-06	BMP4/RB1/EGFR/INSR/CTNNB1/BCL2/HIF1A	7
GO:0051781	positive regulation of cell division	0.0869565	89/18800	8.95506e-07	1.13304e-05	4.52757e-06	CDC6/TGFB1/IL1A/PRKCE/PGF/VEGFA	6
GO:1902105	regulation of leukocyte differentiation	0.130435	283/18800	8.99009e-07	1.1331e-05	4.5278e-06	TGFB1/BMP4/RB1/ERBB2/STAT5B/FOS/CTNNB1/HMGB1/IL10	9
GO:0045637	regulation of myeloid cell differentiation	0.115942	208/18800	9.1993e-07	1.15502e-05	4.61542e-06	NFKBIA/TGFB1/STAT3/RB1/STAT5B/FOS/CTNNB1/HIF1A	8
GO:0071456	cellular response to hypoxia	0.101449	143/18800	9.25123e-07	1.15711e-05	4.62376e-06	HMOX1/PRKCE/PPARD/CFLAR/BCL2/HIF1A/VEGFA	7
GO:0002460	adaptive immune response based on somatic recombination of immune receptors built from immunoglobulin superfamily domains	0.144928	370/18800	9.35201e-07	1.16527e-05	4.65635e-06	ERCC1/RELB/TGFB1/AHR/STAT3/ICAM1/HMGB1/IL6/IL10/PRKCD	10
GO:0038083	peptidyl-tyrosine autophosphorylation	0.057971	21/18800	9.4865e-07	1.17755e-05	4.70543e-06	MAPK3/EGFR/INSR/VEGFA	4
GO:0042475	odontogenesis of dentin-containing tooth	0.0869565	90/18800	9.56717e-07	1.17863e-05	4.70976e-06	NGFR/SERPINE1/BMP4/BAX/CTNNB1/PPARA	6
GO:0070301	cellular response to hydrogen peroxide	0.0869565	90/18800	9.56717e-07	1.17863e-05	4.70976e-06	HGF/TRPA1/MET/IL6/IL10/PRKCD	6
GO:0030225	macrophage differentiation	0.0724638	49/18800	9.66936e-07	1.18233e-05	4.72454e-06	TGFB1/BMP4/RB1/MMP9/VEGFA	5
GO:0048546	digestive tract morphogenesis	0.0724638	49/18800	9.66936e-07	1.18233e-05	4.72454e-06	BMP4/EGFR/CTNNB1/BCL2/HIF1A	5
GO:0002573	myeloid leukocyte differentiation	0.115942	210/18800	9.88685e-07	1.20443e-05	4.81285e-06	RELB/TGFB1/BMP4/RB1/FOS/CTNNB1/MMP9/VEGFA	8
GO:0043524	negative regulation of neuron apoptotic process	0.101449	145/18800	1.01583e-06	1.23291e-05	4.92666e-06	HMOX1/NTRK2/BAX/BCL2L1/BCL2/IL10/HIF1A	7
GO:0010632	regulation of epithelial cell migration	0.130435	290/18800	1.10113e-06	1.33151e-05	5.32067e-06	HMOX1/TGFB1/BMP4/PRKCE/MET/HMGB1/MMP9/HIF1A/VEGFA	9
GO:0010888	negative regulation of lipid storage	0.057971	22/18800	1.15626e-06	1.38793e-05	5.54611e-06	NFKBIA/PPARD/IL6/PPARA	4
GO:1903798	regulation of production of miRNAs involved in gene silencing by miRNA	0.057971	22/18800	1.15626e-06	1.38793e-05	5.54611e-06	TGFB1/BMP4/EGFR/IL6	4
GO:0009409	response to cold	0.0724638	51/18800	1.18441e-06	1.41654e-05	5.66043e-06	NFKBIA/TRPA1/UCP1/FOS/UCP2	5
GO:0051222	positive regulation of protein transport	0.130435	293/18800	1.19911e-06	1.42891e-05	5.70985e-06	TGFB1/IL1A/ERBB2/PRKCE/PPARD/GSK3B/HIF1A/PRKCD/BBC3	9
GO:0007159	leukocyte cell-cell adhesion	0.144928	381/18800	1.21876e-06	1.44706e-05	5.78238e-06	BMP4/IL1A/ICAM1/ERBB2/STAT5B/CASP3/HMGB1/IL6/IL10/PPARA	10
GO:0050878	regulation of body fluid levels	0.144928	382/18800	1.24792e-06	1.47633e-05	5.89936e-06	VCL/PLAT/SERPINE1/STAT5B/PRKCE/MET/IL6/HIF1A/VEGFA/PRKCD	10
GO:0001667	ameboidal-type cell migration	0.15942	480/18800	1.28555e-06	1.51538e-05	6.05538e-06	HMOX1/TIMP1/TGFB1/BMP4/PRKCE/PPARD/MET/HMGB1/MMP9/HIF1A/VEGFA	11
GO:0043525	positive regulation of neuron apoptotic process	0.0724638	52/18800	1.3067e-06	1.53247e-05	6.12367e-06	BAX/CASP3/CASP9/CTNNB1/MCL1	5
GO:0010001	glial cell differentiation	0.115942	218/18800	1.3094e-06	1.53247e-05	6.12367e-06	MAPK1/TGFB1/MAPK3/STAT3/ERBB2/NTRK2/CTNNB1/IL6	8
GO:0048661	positive regulation of smooth muscle cell proliferation	0.0869565	95/18800	1.31643e-06	1.53521e-05	6.13463e-06	HMOX1/TGFB1/BMP4/MMP9/IL6/IL10	6
GO:0036294	cellular response to decreased oxygen levels	0.101449	151/18800	1.33391e-06	1.55007e-05	6.19402e-06	HMOX1/PRKCE/PPARD/CFLAR/BCL2/HIF1A/VEGFA	7
GO:0035148	tube formation	0.101449	152/18800	1.39426e-06	1.59647e-05	6.37941e-06	TGFB1/BMP4/CASP3/CTNNB1/HIF1A/VEGFA/YWHAZ	7
GO:0060571	morphogenesis of an epithelial fold	0.057971	23/18800	1.39581e-06	1.59647e-05	6.37941e-06	BMP4/EGFR/CTNNB1/HIF1A	4
GO:0070920	regulation of production of small RNA involved in gene silencing by RNA	0.057971	23/18800	1.39581e-06	1.59647e-05	6.37941e-06	TGFB1/BMP4/EGFR/IL6	4
GO:0070374	positive regulation of ERK1 and ERK2 cascade	0.115942	220/18800	1.40219e-06	1.59647e-05	6.37941e-06	TGFB1/BMP4/MAPK3/IL1A/ICAM1/EGFR/CFLAR/HMGB1	8
GO:0042692	muscle cell differentiation	0.144928	387/18800	1.40306e-06	1.59647e-05	6.37941e-06	TGFB1/BMP4/RB1/CASP3/CFLAR/CTNNB1/BCL2/VEGFA/PPARA/SMAD1	10
GO:0045786	negative regulation of cell cycle	0.144928	387/18800	1.40306e-06	1.59647e-05	6.37941e-06	CDC6/TGFB1/BMP4/CDK2/RB1/CASP3/CTNNB1/BCL2/CDKN1A/IL10	10
GO:0035051	cardiocyte differentiation	0.101449	153/18800	1.4569e-06	1.65199e-05	6.60127e-06	MAPK1/TGFB1/BMP4/MAPK3/EGFR/VEGFA/PPARA	7
GO:0002532	production of molecular mediator involved in inflammatory response	0.0869565	97/18800	1.4882e-06	1.67589e-05	6.69676e-06	LBP/SERPINE1/STAT3/IL6/HIF1A/PPARA	6
GO:0032642	regulation of chemokine production	0.0869565	97/18800	1.4882e-06	1.67589e-05	6.69676e-06	HMOX1/LBP/HMGB1/IL6/IL10/HIF1A	6
GO:0032602	chemokine production	0.0869565	98/18800	1.58071e-06	1.7636e-05	7.04728e-06	HMOX1/LBP/HMGB1/IL6/IL10/HIF1A	6
GO:1903202	negative regulation of oxidative stress-induced cell death	0.0724638	54/18800	1.58105e-06	1.7636e-05	7.04728e-06	HGF/MET/CTNNB1/IL10/HIF1A	5
GO:0001822	kidney development	0.130435	303/18800	1.58224e-06	1.7636e-05	7.04728e-06	BMP4/BAX/CFLAR/CASP9/CTNNB1/MMP9/BCL2/VEGFA/SMAD1	9
GO:0035994	response to muscle stretch	0.057971	24/18800	1.67035e-06	1.8555e-05	7.4145e-06	NFKBIA/NFKB1/FOS/CTNNB1	4
GO:0045639	positive regulation of myeloid cell differentiation	0.0869565	99/18800	1.67786e-06	1.85755e-05	7.42268e-06	TGFB1/STAT3/RB1/STAT5B/FOS/HIF1A	6
GO:0044089	positive regulation of cellular component biogenesis	0.15942	494/18800	1.69986e-06	1.87556e-05	7.49467e-06	ERCC1/BIK/TGFB1/CDK2/NTRK2/BAX/MMP3/PRKCE/MET/GSK3B/VEGFA	11
GO:0009743	response to carbohydrate	0.115942	226/18800	1.71494e-06	1.88586e-05	7.53581e-06	ERCC1/IL1A/ICAM1/PRKCE/PPARD/CASP3/UCP2/HIF1A	8
GO:0010883	regulation of lipid storage	0.0724638	55/18800	1.73423e-06	1.90069e-05	7.59507e-06	NFKBIA/NFKB1/PPARD/IL6/PPARA	5
GO:0071496	cellular response to external stimulus	0.130435	309/18800	1.85951e-06	2.02446e-05	8.08965e-06	MAPK1/HMOX1/NFKB1/MAPK3/FOS/UCP2/BCL2/CDKN1A/PPARA	9
GO:1904951	positive regulation of establishment of protein localization	0.130435	309/18800	1.85951e-06	2.02446e-05	8.08965e-06	TGFB1/IL1A/ERBB2/PRKCE/PPARD/GSK3B/HIF1A/PRKCD/BBC3	9
GO:0010332	response to gamma radiation	0.0724638	56/18800	1.89886e-06	2.06045e-05	8.23345e-06	IL1A/BAX/BCL2L1/BCL2/CDKN1A	5
GO:0032677	regulation of interleukin-8 production	0.0869565	102/18800	1.99899e-06	2.16195e-05	8.63904e-06	LBP/SERPINE1/STAT3/HMGB1/IL6/IL10	6
GO:0072001	renal system development	0.130435	312/18800	2.01322e-06	2.17017e-05	8.67191e-06	BMP4/BAX/CFLAR/CASP9/CTNNB1/MMP9/BCL2/VEGFA/SMAD1	9
GO:0007566	embryo implantation	0.0724638	57/18800	2.07554e-06	2.22273e-05	8.88193e-06	TIMP1/PPARD/MMP9/SPP1/VEGFA	5
GO:0043388	positive regulation of DNA binding	0.0724638	57/18800	2.07554e-06	2.22273e-05	8.88193e-06	TGFB1/RB1/CTNNB1/HMGB1/MMP9	5
GO:0002274	myeloid leukocyte activation	0.115942	232/18800	2.08528e-06	2.22588e-05	8.89451e-06	HMOX1/LBP/RELB/PRKCE/HMGB1/IL6/IL10/PRKCD	8
GO:0060537	muscle tissue development	0.144928	405/18800	2.10988e-06	2.24464e-05	8.96948e-06	TGFB1/BMP4/RB1/FOS/CFLAR/CTNNB1/BCL2/VEGFA/PPARA/SMAD1	10
GO:0032637	interleukin-8 production	0.0869565	103/18800	2.11655e-06	2.24464e-05	8.96948e-06	LBP/SERPINE1/STAT3/HMGB1/IL6/IL10	6
GO:0001837	epithelial to mesenchymal transition	0.101449	162/18800	2.13453e-06	2.2564e-05	9.01647e-06	TGFB1/HGF/BMP4/GSK3B/CTNNB1/IL6/HIF1A	7
GO:0045930	negative regulation of mitotic cell cycle	0.115942	234/18800	2.22295e-06	2.34232e-05	9.35979e-06	CDC6/BMP4/CDK2/RB1/CTNNB1/BCL2/CDKN1A/IL10	8
GO:0097305	response to alcohol	0.115942	235/18800	2.29464e-06	2.4101e-05	9.63066e-06	TGFB1/AHR/UCP1/BCL2L1/PRKCE/FOS/CTNNB1/PPARA	8
GO:0090200	positive regulation of release of cytochrome c from mitochondria	0.057971	26/18800	2.33709e-06	2.44685e-05	9.77751e-06	BIK/BAX/MMP9/BBC3	4
GO:0002703	regulation of leukocyte mediated immunity	0.115942	236/18800	2.36828e-06	2.47161e-05	9.87645e-06	HMOX1/TGFB1/AHR/ICAM1/STAT5B/HMGB1/IL6/IL10	8
GO:0060249	anatomical structure homeostasis	0.130435	319/18800	2.41514e-06	2.51251e-05	1.00399e-05	VCL/RB1/BAX/CTNNB1/SPP1/BCL2/IL6/HIF1A/VEGFA	9
GO:0071453	cellular response to oxygen levels	0.101449	166/18800	2.51088e-06	2.60384e-05	1.04048e-05	HMOX1/PRKCE/PPARD/CFLAR/BCL2/HIF1A/VEGFA	7
GO:1903055	positive regulation of extracellular matrix organization	0.057971	27/18800	2.73596e-06	2.82831e-05	1.13018e-05	TGFB1/RB1/CFLAR/IL6	4
GO:0001649	osteoblast differentiation	0.115942	241/18800	2.76744e-06	2.85186e-05	1.13959e-05	CHRD/HGF/BMP4/GSK3B/CTNNB1/SPP1/IL6/SMAD1	8
GO:0021543	pallium development	0.101449	169/18800	2.82821e-06	2.90534e-05	1.16096e-05	EGFR/NTRK2/BAX/CASP3/GSK3B/CTNNB1/HIF1A	7
GO:2001242	regulation of intrinsic apoptotic signaling pathway	0.101449	171/18800	3.05784e-06	3.13142e-05	1.2513e-05	BAX/BCL2L1/MCL1/MMP9/BCL2/HIF1A/BBC3	7
GO:0031668	cellular response to extracellular stimulus	0.115942	245/18800	3.12667e-06	3.19193e-05	1.27548e-05	MAPK1/HMOX1/MAPK3/FOS/UCP2/BCL2/CDKN1A/PPARA	8
GO:0022617	extracellular matrix disassembly	0.0724638	62/18800	3.16251e-06	3.19494e-05	1.27668e-05	TGFB1/MMP13/MMP3/MMP9/IL6	5
GO:0032757	positive regulation of interleukin-8 production	0.0724638	62/18800	3.16251e-06	3.19494e-05	1.27668e-05	LBP/SERPINE1/STAT3/HMGB1/IL6	5
GO:0046902	regulation of mitochondrial membrane permeability	0.0724638	62/18800	3.16251e-06	3.19494e-05	1.27668e-05	BAX/BCL2L1/GSK3B/BCL2/BBC3	5
GO:0032635	interleukin-6 production	0.101449	172/18800	3.17836e-06	3.19494e-05	1.27668e-05	LBP/HGF/IL1A/STAT3/HMGB1/IL6/IL10	7
GO:0032675	regulation of interleukin-6 production	0.101449	172/18800	3.17836e-06	3.19494e-05	1.27668e-05	LBP/HGF/IL1A/STAT3/HMGB1/IL6/IL10	7
GO:2001020	regulation of response to DNA damage stimulus	0.115942	246/18800	3.22242e-06	3.22932e-05	1.29042e-05	ERCC1/EGFR/BCL2L1/CASP9/HMGB1/MCL1/BCL2/PRKCD	8
GO:0021537	telencephalon development	0.115942	247/18800	3.32065e-06	3.31762e-05	1.3257e-05	BMP4/EGFR/NTRK2/BAX/CASP3/GSK3B/CTNNB1/HIF1A	8
GO:0010950	positive regulation of endopeptidase activity	0.101449	174/18800	3.43134e-06	3.41778e-05	1.36573e-05	NGFR/STAT3/BAX/CFLAR/CASP9/HMGB1/BBC3	7
GO:0021987	cerebral cortex development	0.0869565	112/18800	3.45102e-06	3.42697e-05	1.3694e-05	EGFR/NTRK2/BAX/GSK3B/CTNNB1/HIF1A	6
GO:0032102	negative regulation of response to external stimulus	0.144928	429/18800	3.52334e-06	3.48821e-05	1.39387e-05	PLAT/HGF/SERPINE1/NFKB1/RB1/PPARD/SPP1/IL10/PPARA/PRKCD	10
GO:0010575	positive regulation of vascular endothelial growth factor production	0.057971	29/18800	3.68225e-06	3.61279e-05	1.44365e-05	TGFB1/IL1A/IL6/HIF1A	4
GO:0097421	liver regeneration	0.057971	29/18800	3.68225e-06	3.61279e-05	1.44365e-05	HMOX1/UCP2/IL6/IL10	4
GO:1903203	regulation of oxidative stress-induced neuron death	0.057971	29/18800	3.68225e-06	3.61279e-05	1.44365e-05	CTNNB1/MCL1/IL10/HIF1A	4
GO:2000241	regulation of reproductive process	0.101449	176/18800	3.70091e-06	3.61365e-05	1.444e-05	TIMP1/PLAT/BMP4/IL1A/INSR/CTNNB1/VEGFA	7
GO:0030888	regulation of B cell proliferation	0.0724638	64/18800	3.70518e-06	3.61365e-05	1.444e-05	AHR/CASP3/BCL2/CDKN1A/IL10	5
GO:0050708	regulation of protein secretion	0.115942	252/18800	3.85089e-06	3.74462e-05	1.49633e-05	TGFB1/IL1A/HMGCR/PRKCE/PPARD/UCP2/IL6/HIF1A	8
GO:0002260	lymphocyte homeostasis	0.0724638	65/18800	4.00258e-06	3.8806e-05	1.55067e-05	BAX/STAT5B/CASP3/BCL2/HIF1A	5
GO:0018107	peptidyl-threonine phosphorylation	0.0869565	115/18800	4.02395e-06	3.88982e-05	1.55435e-05	MAPK1/TGFB1/GSK3B/BCL2/PRKCD/TBK1	6
GO:0001933	negative regulation of protein phosphorylation	0.130435	341/18800	4.16093e-06	4.01041e-05	1.60254e-05	TGFB1/HGF/BMP4/RB1/HMGCR/BAX/CASP3/CDKN1A/PRKCD	9
GO:0050863	regulation of T cell activation	0.130435	342/18800	4.26104e-06	4.09485e-05	1.63628e-05	BMP4/IL1A/ERBB2/STAT5B/CASP3/CTNNB1/HMGB1/IL6/IL10	9
GO:0045927	positive regulation of growth	0.115942	256/18800	4.32528e-06	4.14443e-05	1.6561e-05	ERBB2/EGFR/STAT5B/INSR/PPARD/BCL2/VEGFA/NEDD4L	8
GO:0045446	endothelial cell differentiation	0.0869565	117/18800	4.44719e-06	4.24882e-05	1.69781e-05	VCL/BMP4/ICAM1/MET/CTNNB1/VEGFA	6
GO:1903037	regulation of leukocyte cell-cell adhesion	0.130435	344/18800	4.46749e-06	4.25581e-05	1.7006e-05	BMP4/IL1A/ERBB2/STAT5B/CASP3/HMGB1/IL6/IL10/PPARA	9
GO:0050728	negative regulation of inflammatory response	0.101449	182/18800	4.61784e-06	4.38628e-05	1.75274e-05	HGF/NFKB1/RB1/PPARD/IL10/PPARA/PRKCD	7
GO:0030278	regulation of ossification	0.0869565	118/18800	4.67199e-06	4.42489e-05	1.76817e-05	MAPK1/TGFB1/BMP4/MAPK3/BCL2/HIF1A	6
GO:0032868	response to insulin	0.115942	259/18800	4.71282e-06	4.4507e-05	1.77848e-05	RB1/INSR/UCP2/CFLAR/GSK3B/IL10/PPARA/PRKCD	8
GO:0001782	B cell homeostasis	0.057971	31/18800	4.85129e-06	4.56829e-05	1.82547e-05	BAX/CASP3/BCL2/HIF1A	4
GO:0045785	positive regulation of cell adhesion	0.144928	446/18800	4.96806e-06	4.66485e-05	1.86405e-05	CHRD/IL1A/ERBB2/STAT5B/PRKCE/GSK3B/HMGB1/IL6/IL10/VEGFA	10
GO:0061138	morphogenesis of a branching epithelium	0.101449	185/18800	5.1429e-06	4.81522e-05	1.92414e-05	HGF/BMP4/MET/CTNNB1/BCL2/IL10/VEGFA	7
GO:0048568	embryonic organ development	0.144928	449/18800	5.27033e-06	4.92048e-05	1.9662e-05	ERCC1/MAPK1/TGFB1/BMP4/MAPK3/EGFR/CTNNB1/IL10/HIF1A/VEGFA	10
GO:0002040	sprouting angiogenesis	0.101449	186/18800	5.32859e-06	4.93271e-05	1.97109e-05	NGFR/HMOX1/BMP4/IL10/PGF/VEGFA/SMAD1	7
GO:0030308	negative regulation of cell growth	0.101449	186/18800	5.32859e-06	4.93271e-05	1.97109e-05	TGFB1/RB1/PPARD/SPP1/BCL2/CDKN1A/PPARA	7
GO:0051302	regulation of cell division	0.101449	186/18800	5.32859e-06	4.93271e-05	1.97109e-05	CDC6/TGFB1/IL1A/BCL2L1/PRKCE/PGF/VEGFA	7
GO:0001655	urogenital system development	0.130435	352/18800	5.38168e-06	4.96782e-05	1.98512e-05	BMP4/BAX/CFLAR/CASP9/CTNNB1/MMP9/BCL2/VEGFA/SMAD1	9
GO:0007611	learning or memory	0.115942	264/18800	5.42416e-06	4.99297e-05	1.99517e-05	MAPK1/EGFR/NTRK2/HMGCR/INSR/FOS/CASP3/HIF1A	8
GO:0002697	regulation of immune effector process	0.130435	353/18800	5.50652e-06	5.05459e-05	2.01979e-05	HMOX1/LBP/TGFB1/AHR/ICAM1/STAT5B/HMGB1/IL6/IL10	9
GO:0033079	immature T cell proliferation	0.0434783	10/18800	5.57438e-06	5.09061e-05	2.03418e-05	BMP4/IL1A/ERBB2	3
GO:0031330	negative regulation of cellular catabolic process	0.115942	265/18800	5.57683e-06	5.09061e-05	2.03418e-05	HMOX1/TIMP1/HGF/STAT3/MET/MCL1/BCL2/IL10	8
GO:0048593	camera-type eye morphogenesis	0.0869565	122/18800	5.66561e-06	5.143e-05	2.05512e-05	BMP4/NTRK2/BAX/CTNNB1/HIF1A/VEGFA	6
GO:0071901	negative regulation of protein serine/threonine kinase activity	0.0869565	122/18800	5.66561e-06	5.143e-05	2.05512e-05	BMP4/RB1/HMGCR/CASP3/CDKN1A/PRKCD	6
GO:0045165	cell fate commitment	0.115942	266/18800	5.73313e-06	5.18991e-05	2.07386e-05	BMP4/STAT3/CASP3/CTNNB1/MCL1/BCL2/IL6/SMAD1	8
GO:0032722	positive regulation of chemokine production	0.0724638	70/18800	5.78233e-06	5.22002e-05	2.0859e-05	HMOX1/LBP/HMGB1/IL6/HIF1A	5
GO:0002443	leukocyte mediated immunity	0.144928	457/18800	6.15574e-06	5.54186e-05	2.2145e-05	ERCC1/HMOX1/TGFB1/AHR/ICAM1/STAT5B/HMGB1/IL6/IL10/PRKCD	10
GO:0018210	peptidyl-threonine modification	0.0869565	124/18800	6.22316e-06	5.58717e-05	2.23261e-05	MAPK1/TGFB1/GSK3B/BCL2/PRKCD/TBK1	6
GO:0036475	neuron death in response to oxidative stress	0.057971	33/18800	6.27427e-06	5.58717e-05	2.23261e-05	CTNNB1/MCL1/IL10/HIF1A	4
GO:1901099	negative regulation of signal transduction in absence of ligand	0.057971	33/18800	6.27427e-06	5.58717e-05	2.23261e-05	IL1A/BCL2L1/MCL1/BCL2	4
GO:2001240	negative regulation of extrinsic apoptotic signaling pathway in absence of ligand	0.057971	33/18800	6.27427e-06	5.58717e-05	2.23261e-05	IL1A/BCL2L1/MCL1/BCL2	4
GO:0043280	positive regulation of cysteine-type endopeptidase activity involved in apoptotic process	0.0869565	125/18800	6.51819e-06	5.78865e-05	2.31312e-05	NGFR/BAX/CFLAR/CASP9/HMGB1/BBC3	6
GO:0010952	positive regulation of peptidase activity	0.101449	192/18800	6.56399e-06	5.81357e-05	2.32307e-05	NGFR/STAT3/BAX/CFLAR/CASP9/HMGB1/BBC3	7
GO:0001894	tissue homeostasis	0.115942	272/18800	6.75104e-06	5.96312e-05	2.38283e-05	VCL/RB1/BAX/CTNNB1/SPP1/BCL2/IL6/VEGFA	8
GO:0002449	lymphocyte mediated immunity	0.130435	365/18800	7.21003e-06	6.35141e-05	2.53799e-05	ERCC1/TGFB1/AHR/ICAM1/STAT5B/HMGB1/IL6/IL10/PRKCD	9
GO:0045669	positive regulation of osteoblast differentiation	0.0724638	74/18800	7.60935e-06	6.68037e-05	2.66944e-05	HGF/BMP4/CTNNB1/IL6/SMAD1	5
GO:0071492	cellular response to UV-A	0.0434783	11/18800	7.64461e-06	6.68037e-05	2.66944e-05	TIMP1/MMP3/MMP9	3
GO:0072584	caveolin-mediated endocytosis	0.0434783	11/18800	7.64461e-06	6.68037e-05	2.66944e-05	MAPK1/MAPK3/NEDD4L	3
GO:0043536	positive regulation of blood vessel endothelial cell migration	0.0724638	75/18800	8.1298e-06	7.08174e-05	2.82983e-05	HMOX1/TGFB1/HMGB1/HIF1A/VEGFA	5
GO:0042476	odontogenesis	0.0869565	130/18800	8.16874e-06	7.08174e-05	2.82983e-05	NGFR/SERPINE1/BMP4/BAX/CTNNB1/PPARA	6
GO:0048565	digestive tract development	0.0869565	130/18800	8.16874e-06	7.08174e-05	2.82983e-05	BMP4/RB1/EGFR/CTNNB1/BCL2/HIF1A	6
GO:0001763	morphogenesis of a branching structure	0.101449	199/18800	8.29763e-06	7.1745e-05	2.86689e-05	HGF/BMP4/MET/CTNNB1/BCL2/IL10/VEGFA	7
GO:0051146	striated muscle cell differentiation	0.115942	281/18800	8.56265e-06	7.37434e-05	2.94675e-05	TGFB1/BMP4/RB1/CASP3/CFLAR/BCL2/VEGFA/PPARA	8
GO:0034284	response to monosaccharide	0.101449	200/18800	8.57377e-06	7.37434e-05	2.94675e-05	IL1A/ICAM1/PRKCE/PPARD/CASP3/UCP2/HIF1A	7
GO:0033674	positive regulation of kinase activity	0.144928	476/18800	8.79211e-06	7.54234e-05	3.01388e-05	CDC6/TGFB1/ERBB2/EGFR/NTRK2/INSR/MET/CDKN1A/VEGFA/PRKCD	10
GO:0035270	endocrine system development	0.0869565	132/18800	8.91714e-06	7.62963e-05	3.04876e-05	MAPK1/BMP4/MAPK3/INSR/GSK3B/IL6	6
GO:0006919	activation of cysteine-type endopeptidase activity involved in apoptotic process	0.0724638	77/18800	9.25404e-06	7.85635e-05	3.13936e-05	NGFR/BAX/CFLAR/CASP9/BBC3	5
GO:0045913	positive regulation of carbohydrate metabolic process	0.0724638	77/18800	9.25404e-06	7.85635e-05	3.13936e-05	NFKB1/INSR/PRKCE/HIF1A/PPARA	5
GO:0090559	regulation of membrane permeability	0.0724638	77/18800	9.25404e-06	7.85635e-05	3.13936e-05	BAX/BCL2L1/GSK3B/BCL2/BBC3	5
GO:0003158	endothelium development	0.0869565	133/18800	9.31165e-06	7.88482e-05	3.15074e-05	VCL/BMP4/ICAM1/MET/CTNNB1/VEGFA	6
GO:0001654	eye development	0.130435	379/18800	9.75126e-06	8.23579e-05	3.29098e-05	BMP4/STAT3/EGFR/NTRK2/BAX/CTNNB1/BCL2/HIF1A/VEGFA	9
GO:0071542	dopaminergic neuron differentiation	0.057971	37/18800	1.00153e-05	8.43708e-05	3.37142e-05	GSK3B/CTNNB1/HIF1A/VEGFA	4
GO:0030879	mammary gland development	0.0869565	135/18800	1.01431e-05	8.5202e-05	3.40463e-05	MAPK1/BMP4/BAX/STAT5B/HIF1A/VEGFA	6
GO:0097531	mast cell migration	0.0434783	12/18800	1.0166e-05	8.5202e-05	3.40463e-05	STAT5B/PGF/VEGFA	3
GO:0007249	I-kappaB kinase/NF-kappaB signaling	0.115942	288/18800	1.02415e-05	8.56157e-05	3.42116e-05	HMOX1/NFKBIA/RELB/IL1A/PRKCE/CFLAR/CTNNB1/TBK1	8
GO:0031349	positive regulation of defense response	0.115942	289/18800	1.05026e-05	8.75751e-05	3.49946e-05	NFKBIA/LBP/SERPINE1/MAPK3/STAT5B/HMGB1/IL6/TBK1	8
GO:0010508	positive regulation of autophagy	0.0869565	136/18800	1.05808e-05	8.77579e-05	3.50676e-05	HMOX1/MAPK3/GSK3B/HMGB1/HIF1A/TBK1	6
GO:0045667	regulation of osteoblast differentiation	0.0869565	136/18800	1.05808e-05	8.77579e-05	3.50676e-05	CHRD/HGF/BMP4/CTNNB1/IL6/SMAD1	6
GO:0150063	visual system development	0.130435	383/18800	1.06049e-05	8.77579e-05	3.50676e-05	BMP4/STAT3/EGFR/NTRK2/BAX/CTNNB1/BCL2/HIF1A/VEGFA	9
GO:0042063	gliogenesis	0.115942	291/18800	1.10417e-05	9.11428e-05	3.64202e-05	MAPK1/TGFB1/MAPK3/STAT3/ERBB2/NTRK2/CTNNB1/IL6	8
GO:0010742	macrophage derived foam cell differentiation	0.057971	38/18800	1.11627e-05	9.16798e-05	3.66348e-05	NFKBIA/TGFB1/NFKB1/PPARA	4
GO:0032965	regulation of collagen biosynthetic process	0.057971	38/18800	1.11627e-05	9.16798e-05	3.66348e-05	TGFB1/BMP4/PPARD/IL6	4
GO:0034504	protein localization to nucleus	0.115942	294/18800	1.18941e-05	9.74423e-05	3.89375e-05	NGFR/NFKBIA/TGFB1/BMP4/STAT3/GSK3B/CDKN1A/PRKCD	8
GO:0048880	sensory system development	0.130435	389/18800	1.20049e-05	9.81045e-05	3.92021e-05	BMP4/STAT3/EGFR/NTRK2/BAX/CTNNB1/BCL2/HIF1A/VEGFA	9
GO:0048863	stem cell differentiation	0.101449	211/18800	1.21496e-05	9.90404e-05	3.95761e-05	MAPK1/BMP4/MAPK3/STAT3/GSK3B/CTNNB1/HIF1A	7
GO:0032885	regulation of polysaccharide biosynthetic process	0.057971	39/18800	1.24041e-05	0.000100366	4.01059e-05	TGFB1/NFKB1/INSR/GSK3B	4
GO:0043029	T cell homeostasis	0.057971	39/18800	1.24041e-05	0.000100366	4.01059e-05	BAX/STAT5B/CASP3/BCL2	4
GO:0090077	foam cell differentiation	0.057971	39/18800	1.24041e-05	0.000100366	4.01059e-05	NFKBIA/TGFB1/NFKB1/PPARA	4
GO:0033044	regulation of chromosome organization	0.101449	212/18800	1.25282e-05	0.000101121	4.04073e-05	ERCC1/CDC6/MAPK1/MAPK3/CDK2/RB1/CTNNB1	7
GO:0010720	positive regulation of cell development	0.115942	297/18800	1.28013e-05	0.000102819	4.10858e-05	TGFB1/BMP4/NTRK2/CTNNB1/BCL2/IL6/HIF1A/VEGFA	8
GO:0048511	rhythmic process	0.115942	297/18800	1.28013e-05	0.000102819	4.10858e-05	NGFR/RELB/AHR/NTRK2/STAT5B/CASP3/GSK3B/PPARA	8
GO:0031669	cellular response to nutrient levels	0.101449	213/18800	1.29165e-05	0.00010349	4.13542e-05	MAPK1/HMOX1/MAPK3/UCP2/BCL2/CDKN1A/PPARA	7
GO:0050671	positive regulation of lymphocyte proliferation	0.0869565	141/18800	1.3005e-05	0.000103945	4.1536e-05	IL1A/STAT5B/HMGB1/BCL2/CDKN1A/IL6	6
GO:0010623	programmed cell death involved in cell development	0.0434783	13/18800	1.3181e-05	0.00010484	4.18938e-05	IL1A/BAX/BCL2	3
GO:0031053	primary miRNA processing	0.0434783	13/18800	1.3181e-05	0.00010484	4.18938e-05	STAT3/IL6/SMAD1	3
GO:0032946	positive regulation of mononuclear cell proliferation	0.0869565	143/18800	1.40923e-05	0.000111547	4.45737e-05	IL1A/STAT5B/HMGB1/BCL2/CDKN1A/IL6	6
GO:2001056	positive regulation of cysteine-type endopeptidase activity	0.0869565	143/18800	1.40923e-05	0.000111547	4.45737e-05	NGFR/BAX/CFLAR/CASP9/HMGB1/BBC3	6
GO:0050866	negative regulation of cell activation	0.101449	216/18800	1.41419e-05	0.00011167	4.46227e-05	HMOX1/BMP4/ERBB2/CASP3/HMGB1/IL10/PRKCD	7
GO:0014065	phosphatidylinositol 3-kinase signaling	0.0869565	144/18800	1.46629e-05	0.000115228	4.60447e-05	HGF/ERBB2/EGFR/NTRK2/INSR/PPARD	6
GO:1903038	negative regulation of leukocyte cell-cell adhesion	0.0869565	144/18800	1.46629e-05	0.000115228	4.60447e-05	BMP4/ERBB2/CASP3/HMGB1/IL10/PPARA	6
GO:0032733	positive regulation of interleukin-10 production	0.057971	41/18800	1.51882e-05	0.000119071	4.75802e-05	HGF/STAT3/HMGB1/IL6	4
GO:0050890	cognition	0.115942	306/18800	1.5881e-05	0.000124205	4.96319e-05	MAPK1/EGFR/NTRK2/HMGCR/INSR/FOS/CASP3/HIF1A	8
GO:0001890	placenta development	0.0869565	147/18800	1.64875e-05	0.000128642	5.14047e-05	MAPK1/EGFR/PPARD/SPP1/IL10/HIF1A	6
GO:0009791	post-embryonic development	0.0724638	87/18800	1.68229e-05	0.000130947	5.23257e-05	ERCC1/BMP4/BAX/BCL2/VEGFA	5
GO:0014031	mesenchymal cell development	0.0724638	88/18800	1.77858e-05	0.000138114	5.51898e-05	MAPK1/BMP4/MAPK3/BCL2/HIF1A	5
GO:0046777	protein autophosphorylation	0.101449	224/18800	1.78882e-05	0.000138581	5.53761e-05	MAPK3/ERBB2/EGFR/NTRK2/INSR/GSK3B/VEGFA	7
GO:0010712	regulation of collagen metabolic process	0.057971	43/18800	1.84067e-05	0.000141926	5.67131e-05	TGFB1/BMP4/PPARD/IL6	4
GO:0071364	cellular response to epidermal growth factor stimulus	0.057971	43/18800	1.84067e-05	0.000141926	5.67131e-05	ERBB2/EGFR/STAT5B/CFLAR	4
GO:2001252	positive regulation of chromosome organization	0.0724638	89/18800	1.87912e-05	0.000144551	5.7762e-05	ERCC1/MAPK1/MAPK3/CDK2/CTNNB1	5
GO:0090287	regulation of cellular response to growth factor stimulus	0.115942	314/18800	1.91209e-05	0.000146743	5.86378e-05	NGFR/CHRD/TGFB1/BMP4/CFLAR/CTNNB1/HIF1A/PPARA	8
GO:0048588	developmental cell growth	0.101449	227/18800	1.94892e-05	0.00014922	5.96277e-05	VCL/GSK3B/CTNNB1/SPP1/VEGFA/PPARA/NEDD4L	7
GO:0050871	positive regulation of B cell activation	0.0869565	152/18800	1.99331e-05	0.000152263	6.08434e-05	TGFB1/STAT5B/BCL2/CDKN1A/IL6/IL10	6
GO:2001239	regulation of extrinsic apoptotic signaling pathway in absence of ligand	0.057971	44/18800	2.01915e-05	0.000153878	6.14889e-05	IL1A/BCL2L1/MCL1/BCL2	4
GO:0045834	positive regulation of lipid metabolic process	0.0869565	153/18800	2.06872e-05	0.000157143	6.27936e-05	TGFB1/IL1A/PRKCE/PPARD/PPARA/PRKCD	6
GO:0048308	organelle inheritance	0.0434783	15/18800	2.08597e-05	0.000157143	6.27936e-05	MAPK1/MAPK3/YWHAZ	3
GO:0048313	Golgi inheritance	0.0434783	15/18800	2.08597e-05	0.000157143	6.27936e-05	MAPK1/MAPK3/YWHAZ	3
GO:0061307	cardiac neural crest cell differentiation involved in heart development	0.0434783	15/18800	2.08597e-05	0.000157143	6.27936e-05	MAPK1/BMP4/MAPK3	3
GO:0061308	cardiac neural crest cell development involved in heart development	0.0434783	15/18800	2.08597e-05	0.000157143	6.27936e-05	MAPK1/BMP4/MAPK3	3
GO:0010594	regulation of endothelial cell migration	0.101449	230/18800	2.1207e-05	0.000159393	6.36925e-05	HMOX1/TGFB1/BMP4/MET/HMGB1/HIF1A/VEGFA	7
GO:0001678	cellular glucose homeostasis	0.0869565	154/18800	2.14642e-05	0.000160957	6.43175e-05	NGFR/ICAM1/PRKCE/PPARD/UCP2/HIF1A	6
GO:0006110	regulation of glycolytic process	0.057971	45/18800	2.21003e-05	0.000163852	6.54745e-05	STAT3/INSR/HIF1A/PPARA	4
GO:0008631	intrinsic apoptotic signaling pathway in response to oxidative stress	0.057971	45/18800	2.21003e-05	0.000163852	6.54745e-05	MCL1/BCL2/HIF1A/PRKCD	4
GO:0032881	regulation of polysaccharide metabolic process	0.057971	45/18800	2.21003e-05	0.000163852	6.54745e-05	TGFB1/NFKB1/INSR/GSK3B	4
GO:0048538	thymus development	0.057971	45/18800	2.21003e-05	0.000163852	6.54745e-05	MAPK1/MAPK3/CTNNB1/BCL2	4
GO:1901861	regulation of muscle tissue development	0.057971	45/18800	2.21003e-05	0.000163852	6.54745e-05	TGFB1/BMP4/CTNNB1/BCL2	4
GO:0007519	skeletal muscle tissue development	0.0869565	155/18800	2.22645e-05	0.000164697	6.58121e-05	TGFB1/RB1/FOS/CFLAR/CTNNB1/BCL2	6
GO:0002696	positive regulation of leukocyte activation	0.130435	421/18800	2.24493e-05	0.00016569	6.62089e-05	LBP/TGFB1/IL1A/STAT5B/HMGB1/BCL2/CDKN1A/IL6/IL10	9
GO:0060560	developmental growth involved in morphogenesis	0.101449	234/18800	2.369e-05	0.000174455	6.97112e-05	VCL/BMP4/GSK3B/CTNNB1/SPP1/VEGFA/NEDD4L	7
GO:1902107	positive regulation of leukocyte differentiation	0.0869565	157/18800	2.39373e-05	0.000175487	7.01237e-05	TGFB1/RB1/STAT5B/FOS/HMGB1/IL10	6
GO:1903708	positive regulation of hemopoiesis	0.0869565	157/18800	2.39373e-05	0.000175487	7.01237e-05	TGFB1/RB1/STAT5B/FOS/HMGB1/IL10	6
GO:0002683	negative regulation of immune system process	0.130435	425/18800	2.41817e-05	0.000176883	7.06814e-05	HMOX1/TGFB1/AHR/BMP4/ERBB2/CASP3/CTNNB1/HMGB1/IL10	9
GO:0001657	ureteric bud development	0.0724638	94/18800	2.45007e-05	0.000178817	7.14543e-05	BMP4/CTNNB1/BCL2/VEGFA/SMAD1	5
GO:0070242	thymocyte apoptotic process	0.0434783	16/18800	2.5606e-05	0.000186468	7.45119e-05	BMP4/BAX/HIF1A	3
GO:0006606	protein import into nucleus	0.0869565	159/18800	2.571e-05	0.000186555	7.45466e-05	NFKBIA/TGFB1/BMP4/STAT3/CDKN1A/PRKCD	6
GO:0072163	mesonephric epithelium development	0.0724638	95/18800	2.57887e-05	0.000186555	7.45466e-05	BMP4/CTNNB1/BCL2/VEGFA/SMAD1	5
GO:0072164	mesonephric tubule development	0.0724638	95/18800	2.57887e-05	0.000186555	7.45466e-05	BMP4/CTNNB1/BCL2/VEGFA/SMAD1	5
GO:0060562	epithelial tube morphogenesis	0.115942	328/18800	2.61293e-05	0.000188603	7.53649e-05	TGFB1/BMP4/CASP3/MET/CTNNB1/BCL2/HIF1A/VEGFA	8
GO:0032964	collagen biosynthetic process	0.057971	47/18800	2.6311e-05	0.000188667	7.53906e-05	TGFB1/BMP4/PPARD/IL6	4
GO:0034198	cellular response to amino acid starvation	0.057971	47/18800	2.6311e-05	0.000188667	7.53906e-05	MAPK1/MAPK3/UCP2/CDKN1A	4
GO:0045601	regulation of endothelial cell differentiation	0.057971	47/18800	2.6311e-05	0.000188667	7.53906e-05	VCL/BMP4/CTNNB1/VEGFA	4
GO:0009267	cellular response to starvation	0.0869565	160/18800	2.66351e-05	0.00019016	7.5987e-05	MAPK1/MAPK3/UCP2/BCL2/CDKN1A/PPARA	6
GO:2000045	regulation of G1/S transition of mitotic cell cycle	0.0869565	160/18800	2.66351e-05	0.00019016	7.5987e-05	CDC6/CDK2/RB1/EGFR/BCL2/CDKN1A	6
GO:0045787	positive regulation of cell cycle	0.115942	329/18800	2.6703e-05	0.00019023	7.60151e-05	CDC6/IL1A/RB1/EGFR/STAT5B/INSR/PRKCE/IL10	8
GO:0032386	regulation of intracellular transport	0.115942	332/18800	2.84881e-05	0.000202155	8.07801e-05	MAPK1/TGFB1/BMP4/MAPK3/ERBB2/GSK3B/PRKCD/BBC3	8
GO:0032755	positive regulation of interleukin-6 production	0.0724638	97/18800	2.85222e-05	0.000202155	8.07801e-05	LBP/IL1A/STAT3/HMGB1/IL6	5
GO:0035272	exocrine system development	0.057971	48/18800	2.86237e-05	0.000202155	8.07801e-05	TGFB1/HGF/EGFR/INSR	4
GO:0048146	positive regulation of fibroblast proliferation	0.057971	48/18800	2.86237e-05	0.000202155	8.07801e-05	NGFR/CDC6/EGFR/CDKN1A	4
GO:0050867	positive regulation of cell activation	0.130435	436/18800	2.95438e-05	0.000207514	8.29217e-05	LBP/TGFB1/IL1A/STAT5B/HMGB1/BCL2/CDKN1A/IL6/IL10	9
GO:0007568	aging	0.0869565	163/18800	2.95725e-05	0.000207514	8.29217e-05	ERCC1/TIMP1/FOS/UCP2/CASP9/IL10	6
GO:0051170	import into nucleus	0.0869565	163/18800	2.95725e-05	0.000207514	8.29217e-05	NFKBIA/TGFB1/BMP4/STAT3/CDKN1A/PRKCD	6
GO:0048569	post-embryonic animal organ development	0.0434783	17/18800	3.10112e-05	0.000215762	8.62174e-05	ERCC1/BAX/VEGFA	3
GO:0071732	cellular response to nitric oxide	0.0434783	17/18800	3.10112e-05	0.000215762	8.62174e-05	CDK2/MMP3/CFLAR	3
GO:0090399	replicative senescence	0.0434783	17/18800	3.10112e-05	0.000215762	8.62174e-05	ERCC1/SERPINE1/CDKN1A	3
GO:2000811	negative regulation of anoikis	0.0434783	17/18800	3.10112e-05	0.000215762	8.62174e-05	NTRK2/MCL1/BCL2	3
GO:1990928	response to amino acid starvation	0.057971	49/18800	3.10821e-05	0.000215797	8.62313e-05	MAPK1/MAPK3/UCP2/CDKN1A	4
GO:0001823	mesonephros development	0.0724638	99/18800	3.14756e-05	0.000218067	8.71385e-05	BMP4/CTNNB1/BCL2/VEGFA/SMAD1	5
GO:1903034	regulation of response to wounding	0.0869565	166/18800	3.27651e-05	0.000226521	9.05169e-05	PLAT/SERPINE1/PRKCE/SPP1/IL10/PRKCD	6
GO:0019216	regulation of lipid metabolic process	0.115942	339/18800	3.30458e-05	0.000227981	9.11003e-05	TGFB1/NFKB1/IL1A/STAT5B/PRKCE/PPARD/PPARA/PRKCD	8
GO:0030857	negative regulation of epithelial cell differentiation	0.057971	50/18800	3.36917e-05	0.000230496	9.21052e-05	IL1A/CTNNB1/MMP9/VEGFA	4
GO:0060425	lung morphogenesis	0.057971	50/18800	3.36917e-05	0.000230496	9.21052e-05	MAPK1/BMP4/MAPK3/CTNNB1	4
GO:0061178	regulation of insulin secretion involved in cellular response to glucose stimulus	0.057971	50/18800	3.36917e-05	0.000230496	9.21052e-05	PRKCE/PPARD/UCP2/HIF1A	4
GO:1903053	regulation of extracellular matrix organization	0.057971	50/18800	3.36917e-05	0.000230496	9.21052e-05	TGFB1/RB1/CFLAR/IL6	4
GO:0060538	skeletal muscle organ development	0.0869565	167/18800	3.38888e-05	0.000231361	9.24509e-05	TGFB1/RB1/FOS/CFLAR/CTNNB1/BCL2	6
GO:0062012	regulation of small molecule metabolic process	0.115942	342/18800	3.51781e-05	0.000239665	9.57689e-05	NFKB1/STAT3/INSR/PRKCE/PPARD/GSK3B/HIF1A/PPARA	8
GO:0048639	positive regulation of developmental growth	0.0869565	169/18800	3.6229e-05	0.000245831	9.82329e-05	STAT5B/INSR/PPARD/BCL2/VEGFA/NEDD4L	6
GO:0043255	regulation of carbohydrate biosynthetic process	0.0724638	102/18800	3.63447e-05	0.000245831	9.82329e-05	TGFB1/NFKB1/INSR/GSK3B/PPARA	5
GO:2001243	negative regulation of intrinsic apoptotic signaling pathway	0.0724638	102/18800	3.63447e-05	0.000245831	9.82329e-05	BCL2L1/MCL1/MMP9/BCL2/HIF1A	5
GO:0045912	negative regulation of carbohydrate metabolic process	0.057971	51/18800	3.64583e-05	0.000245831	9.82329e-05	TGFB1/STAT3/GSK3B/PPARA	4
GO:0060688	regulation of morphogenesis of a branching structure	0.057971	51/18800	3.64583e-05	0.000245831	9.82329e-05	HGF/BMP4/CTNNB1/VEGFA	4
GO:0031214	biomineral tissue development	0.0869565	170/18800	3.74469e-05	0.000251978	0.000100689	TGFB1/BMP4/MMP13/SPP1/HIF1A/PPARA	6
GO:0032760	positive regulation of tumor necrosis factor production	0.0724638	103/18800	3.8091e-05	0.000255787	0.000102211	LBP/IL1A/STAT3/HMGB1/IL6	5
GO:0032206	positive regulation of telomere maintenance	0.057971	52/18800	3.93876e-05	0.000263953	0.000105474	ERCC1/MAPK1/MAPK3/CTNNB1	4
GO:0110148	biomineralization	0.0869565	172/18800	3.99812e-05	0.00026684	0.000106628	TGFB1/BMP4/MMP13/SPP1/HIF1A/PPARA	6
GO:1905475	regulation of protein localization to membrane	0.0869565	172/18800	3.99812e-05	0.00026684	0.000106628	TGFB1/ERBB2/EGFR/BCL2L1/PRKCE/BBC3	6
GO:0009306	protein secretion	0.115942	350/18800	4.1435e-05	0.000275981	0.000110281	TGFB1/IL1A/HMGCR/PRKCE/PPARD/UCP2/IL6/HIF1A	8
GO:0035592	establishment of protein localization to extracellular region	0.115942	351/18800	4.22788e-05	0.000281029	0.000112298	TGFB1/IL1A/HMGCR/PRKCE/PPARD/UCP2/IL6/HIF1A	8
GO:0010718	positive regulation of epithelial to mesenchymal transition	0.057971	53/18800	4.24855e-05	0.000281832	0.000112619	TGFB1/BMP4/CTNNB1/IL6	4
GO:1902170	cellular response to reactive nitrogen species	0.0434783	19/18800	4.3959e-05	0.00029096	0.000116266	CDK2/MMP3/CFLAR	3
GO:0002706	regulation of lymphocyte mediated immunity	0.0869565	175/18800	4.40391e-05	0.00029096	0.000116266	TGFB1/AHR/STAT5B/HMGB1/IL6/IL10	6
GO:0022411	cellular component disassembly	0.130435	460/18800	4.48337e-05	0.000295614	0.000118126	TGFB1/MMP13/BAX/MMP3/INSR/GSK3B/MMP9/IL6/HIF1A	9
GO:0030004	cellular monovalent inorganic cation homeostasis	0.0724638	107/18800	4.57362e-05	0.000300356	0.000120021	MAPK1/MAPK3/IL1A/BCL2/NEDD4L	5
GO:1903557	positive regulation of tumor necrosis factor superfamily cytokine production	0.0724638	107/18800	4.57362e-05	0.000300356	0.000120021	LBP/IL1A/STAT3/HMGB1/IL6	5
GO:0001659	temperature homeostasis	0.0869565	177/18800	4.69232e-05	0.000306921	0.000122644	UCP1/IL1A/STAT3/RB1/UCP2/VEGFA	6
GO:0048015	phosphatidylinositol-mediated signaling	0.0869565	177/18800	4.69232e-05	0.000306921	0.000122644	HGF/ERBB2/EGFR/NTRK2/INSR/PPARD	6
GO:0050730	regulation of peptidyl-tyrosine phosphorylation	0.101449	261/18800	4.75078e-05	0.000310125	0.000123925	TGFB1/HGF/EGFR/PRKCE/IL6/VEGFA/PRKCD	7
GO:0051051	negative regulation of transport	0.130435	464/18800	4.79412e-05	0.000312333	0.000124807	HMOX1/NFKB1/HMGCR/PRKCE/UCP2/HMGB1/MMP9/BCL2/NEDD4L	9
GO:0002043	blood vessel endothelial cell proliferation involved in sprouting angiogenesis	0.057971	55/18800	4.92106e-05	0.000319333	0.000127604	NGFR/HMOX1/BMP4/VEGFA	4
GO:0043470	regulation of carbohydrate catabolic process	0.057971	55/18800	4.92106e-05	0.000319333	0.000127604	STAT3/INSR/HIF1A/PPARA	4
GO:0071692	protein localization to extracellular region	0.115942	359/18800	4.95608e-05	0.00032097	0.000128258	TGFB1/IL1A/HMGCR/PRKCE/PPARD/UCP2/IL6/HIF1A	8
GO:0030324	lung development	0.0869565	179/18800	4.99568e-05	0.000322896	0.000129028	MAPK1/BMP4/MAPK3/CTNNB1/VEGFA/YWHAZ	6
GO:1903204	negative regulation of oxidative stress-induced neuron death	0.0434783	20/18800	5.15806e-05	0.000332082	0.000132698	CTNNB1/IL10/HIF1A	3
GO:1903206	negative regulation of hydrogen peroxide-induced cell death	0.0434783	20/18800	5.15806e-05	0.000332082	0.000132698	HGF/MET/IL10	3
GO:0051091	positive regulation of DNA-binding transcription factor activity	0.101449	265/18800	5.23022e-05	0.000336067	0.000134291	STAT3/CFLAR/CTNNB1/CRTC2/IL6/IL10/VEGFA	7
GO:0043331	response to dsRNA	0.057971	56/18800	5.285e-05	0.000338923	0.000135432	MAPK1/NFKBIA/NFKB1/MAPK3	4
GO:0010721	negative regulation of cell development	0.0869565	181/18800	5.31455e-05	0.000339489	0.000135658	IL1A/GSK3B/CTNNB1/SPP1/IL6/VEGFA	6
GO:0048017	inositol lipid-mediated signaling	0.0869565	181/18800	5.31455e-05	0.000339489	0.000135658	HGF/ERBB2/EGFR/NTRK2/INSR/PPARD	6
GO:0014066	regulation of phosphatidylinositol 3-kinase signaling	0.0724638	111/18800	5.45185e-05	0.000346678	0.000138531	HGF/EGFR/NTRK2/INSR/PPARD	5
GO:0046632	alpha-beta T cell differentiation	0.0724638	111/18800	5.45185e-05	0.000346678	0.000138531	RELB/STAT3/HMGB1/BCL2/IL6	5
GO:0031589	cell-substrate adhesion	0.115942	364/18800	5.46228e-05	0.000346678	0.000138531	VCL/SERPINE1/PRKCE/PPARD/GSK3B/CTNNB1/BCL2/VEGFA	8
GO:0032640	tumor necrosis factor production	0.0869565	182/18800	5.47998e-05	0.000346678	0.000138531	LBP/IL1A/STAT3/HMGB1/IL6/IL10	6
GO:0032680	regulation of tumor necrosis factor production	0.0869565	182/18800	5.47998e-05	0.000346678	0.000138531	LBP/IL1A/STAT3/HMGB1/IL6/IL10	6
GO:0031348	negative regulation of defense response	0.101449	268/18800	5.61527e-05	0.000354479	0.000141648	HGF/NFKB1/RB1/PPARD/IL10/PPARA/PRKCD	7
GO:0030323	respiratory tube development	0.0869565	183/18800	5.64952e-05	0.000354479	0.000141648	MAPK1/BMP4/MAPK3/CTNNB1/VEGFA/YWHAZ	6
GO:0001541	ovarian follicle development	0.057971	57/18800	5.6682e-05	0.000354479	0.000141648	BAX/BCL2L1/BCL2/VEGFA	4
GO:0001658	branching involved in ureteric bud morphogenesis	0.057971	57/18800	5.6682e-05	0.000354479	0.000141648	BMP4/CTNNB1/BCL2/VEGFA	4
GO:0032768	regulation of monooxygenase activity	0.057971	57/18800	5.6682e-05	0.000354479	0.000141648	NFKB1/IL1A/EGFR/HIF1A	4
GO:0070228	regulation of lymphocyte apoptotic process	0.057971	57/18800	5.6682e-05	0.000354479	0.000141648	BMP4/BAX/IL10/HIF1A	4
GO:0051348	negative regulation of transferase activity	0.101449	270/18800	5.88464e-05	0.000367314	0.000146777	BMP4/RB1/HMGCR/CASP3/GSK3B/CDKN1A/PRKCD	7
GO:0007178	transmembrane receptor protein serine/threonine kinase signaling pathway	0.115942	368/18800	5.89767e-05	0.000367427	0.000146822	CHRD/TGFB1/BMP4/MAPK3/STAT3/FOS/PPARA/SMAD1	8
GO:0071731	response to nitric oxide	0.0434783	21/18800	6.00192e-05	0.000373065	0.000149075	CDK2/MMP3/CFLAR	3
GO:0045862	positive regulation of proteolysis	0.115942	369/18800	6.01093e-05	0.000373065	0.000149075	NGFR/STAT3/BAX/CFLAR/GSK3B/CASP9/HMGB1/BBC3	8
GO:0061564	axon development	0.130435	479/18800	6.12711e-05	0.000379556	0.000151669	NGFR/VCL/ERBB2/NTRK2/CASP3/GSK3B/SPP1/BCL2/VEGFA	9
GO:0051251	positive regulation of lymphocyte activation	0.115942	371/18800	6.24289e-05	0.000385999	0.000154243	TGFB1/IL1A/STAT5B/HMGB1/BCL2/CDKN1A/IL6/IL10	8
GO:0051896	regulation of protein kinase B signaling	0.0869565	187/18800	6.37013e-05	0.000391649	0.000156501	TGFB1/EGFR/NTRK2/INSR/MET/PPARA	6
GO:0071706	tumor necrosis factor superfamily cytokine production	0.0869565	187/18800	6.37013e-05	0.000391649	0.000156501	LBP/IL1A/STAT3/HMGB1/IL6/IL10	6
GO:1903555	regulation of tumor necrosis factor superfamily cytokine production	0.0869565	187/18800	6.37013e-05	0.000391649	0.000156501	LBP/IL1A/STAT3/HMGB1/IL6/IL10	6
GO:0010574	regulation of vascular endothelial growth factor production	0.057971	59/18800	6.4949e-05	0.000397828	0.00015897	TGFB1/IL1A/IL6/HIF1A	4
GO:0035773	insulin secretion involved in cellular response to glucose stimulus	0.057971	59/18800	6.4949e-05	0.000397828	0.00015897	PRKCE/PPARD/UCP2/HIF1A	4
GO:0043123	positive regulation of I-kappaB kinase/NF-kappaB signaling	0.0869565	188/18800	6.56129e-05	0.000400397	0.000159997	HMOX1/IL1A/PRKCE/CFLAR/CTNNB1/TBK1	6
GO:1902806	regulation of cell cycle G1/S phase transition	0.0869565	188/18800	6.56129e-05	0.000400397	0.000159997	CDC6/CDK2/RB1/EGFR/BCL2/CDKN1A	6
GO:0002286	T cell activation involved in immune response	0.0724638	116/18800	6.72678e-05	0.000408973	0.000163424	RELB/STAT3/ICAM1/HMGB1/IL6	5
GO:0043406	positive regulation of MAP kinase activity	0.0724638	116/18800	6.72678e-05	0.000408973	0.000163424	TGFB1/ERBB2/EGFR/INSR/VEGFA	5
GO:0009749	response to glucose	0.0869565	189/18800	6.757e-05	0.00041005	0.000163854	ICAM1/PRKCE/PPARD/CASP3/UCP2/HIF1A	6
GO:0030900	forebrain development	0.115942	376/18800	6.85563e-05	0.000415266	0.000165938	BMP4/EGFR/NTRK2/BAX/CASP3/GSK3B/CTNNB1/HIF1A	8
GO:0002363	alpha-beta T cell lineage commitment	0.0434783	22/18800	6.93134e-05	0.000417537	0.000166846	STAT3/BCL2/IL6	3
GO:0043369	CD4-positive or CD8-positive, alpha-beta T cell lineage commitment	0.0434783	22/18800	6.93134e-05	0.000417537	0.000166846	STAT3/BCL2/IL6	3
GO:1901032	negative regulation of response to reactive oxygen species	0.0434783	22/18800	6.93134e-05	0.000417537	0.000166846	HGF/MET/IL10	3
GO:0007006	mitochondrial membrane organization	0.0724638	117/18800	7.00723e-05	0.000421334	0.000168363	BAX/BCL2L1/GSK3B/BCL2/BBC3	5
GO:0071248	cellular response to metal ion	0.0869565	191/18800	7.16243e-05	0.000429877	0.000171777	MAPK1/HMOX1/MAPK3/EGFR/FOS/MMP9	6
GO:0043542	endothelial cell migration	0.101449	279/18800	7.23136e-05	0.000433221	0.000173113	HMOX1/TGFB1/BMP4/MET/HMGB1/HIF1A/VEGFA	7
GO:0032368	regulation of lipid transport	0.0724638	118/18800	7.29661e-05	0.000436332	0.000174356	NFKB1/IL1A/SPP1/PPARA/PRKCD	5
GO:0002695	negative regulation of leukocyte activation	0.0869565	193/18800	7.58705e-05	0.00045171	0.000180501	HMOX1/BMP4/ERBB2/CASP3/HMGB1/IL10	6
GO:0009746	response to hexose	0.0869565	193/18800	7.58705e-05	0.00045171	0.000180501	ICAM1/PRKCE/PPARD/CASP3/UCP2/HIF1A	6
GO:2000278	regulation of DNA biosynthetic process	0.0724638	119/18800	7.59512e-05	0.00045171	0.000180501	MAPK1/HGF/MAPK3/CTNNB1/CDKN1A	5
GO:0042594	response to starvation	0.0869565	196/18800	8.26144e-05	0.000490448	0.000195981	MAPK1/MAPK3/UCP2/BCL2/CDKN1A/PPARA	6
GO:0010573	vascular endothelial growth factor production	0.057971	63/18800	8.40718e-05	0.000493733	0.000197293	TGFB1/IL1A/IL6/HIF1A	4
GO:0032613	interleukin-10 production	0.057971	63/18800	8.40718e-05	0.000493733	0.000197293	HGF/STAT3/HMGB1/IL6	4
GO:0032653	regulation of interleukin-10 production	0.057971	63/18800	8.40718e-05	0.000493733	0.000197293	HGF/STAT3/HMGB1/IL6	4
GO:0060675	ureteric bud morphogenesis	0.057971	63/18800	8.40718e-05	0.000493733	0.000197293	BMP4/CTNNB1/BCL2/VEGFA	4
GO:0070059	intrinsic apoptotic signaling pathway in response to endoplasmic reticulum stress	0.057971	63/18800	8.40718e-05	0.000493733	0.000197293	BAX/BCL2L1/BCL2/BBC3	4
GO:2000242	negative regulation of reproductive process	0.057971	63/18800	8.40718e-05	0.000493733	0.000197293	TIMP1/PLAT/BMP4/IL1A	4
GO:0001952	regulation of cell-matrix adhesion	0.0724638	123/18800	8.88441e-05	0.000520826	0.00020812	VCL/SERPINE1/GSK3B/BCL2/VEGFA	5
GO:0001885	endothelial cell development	0.057971	64/18800	8.94295e-05	0.00052239	0.000208744	VCL/ICAM1/MET/VEGFA	4
GO:0072171	mesonephric tubule morphogenesis	0.057971	64/18800	8.94295e-05	0.00052239	0.000208744	BMP4/CTNNB1/BCL2/VEGFA	4
GO:0071674	mononuclear cell migration	0.0869565	199/18800	8.98281e-05	0.000522818	0.000208916	MAPK1/SERPINE1/MAPK3/ICAM1/HMGB1/IL6	6
GO:1903828	negative regulation of protein localization	0.0869565	199/18800	8.98281e-05	0.000522818	0.000208916	TGFB1/HMGCR/BCL2L1/UCP2/GSK3B/NEDD4L	6
GO:0006869	lipid transport	0.115942	391/18800	9.00203e-05	0.000522818	0.000208916	LBP/NFKB1/ABCG2/IL1A/PPARD/SPP1/PPARA/PRKCD	8
GO:0002052	positive regulation of neuroblast proliferation	0.0434783	24/18800	9.06197e-05	0.000522818	0.000208916	CTNNB1/HIF1A/VEGFA	3
GO:1901522	positive regulation of transcription from RNA polymerase II promoter involved in cellular response to chemical stimulus	0.0434783	24/18800	9.06197e-05	0.000522818	0.000208916	HIF1A/VEGFA/SMAD1	3
GO:2000209	regulation of anoikis	0.0434783	24/18800	9.06197e-05	0.000522818	0.000208916	NTRK2/MCL1/BCL2	3
GO:2000679	positive regulation of transcription regulatory region DNA binding	0.0434783	24/18800	9.06197e-05	0.000522818	0.000208916	TGFB1/RB1/CTNNB1	3
GO:0001838	embryonic epithelial tube formation	0.0724638	124/18800	9.23155e-05	0.000531666	0.000212451	TGFB1/BMP4/CASP3/CTNNB1/HIF1A	5
GO:0009612	response to mechanical stimulus	0.0869565	201/18800	9.49099e-05	0.000542539	0.000216796	NFKBIA/NFKB1/TRPA1/MAPK3/FOS/CTNNB1	6
GO:0014823	response to activity	0.057971	65/18800	9.50313e-05	0.000542539	0.000216796	PPARD/IL6/IL10/HIF1A	4
GO:0042093	T-helper cell differentiation	0.057971	65/18800	9.50313e-05	0.000542539	0.000216796	RELB/STAT3/HMGB1/IL6	4
GO:0048645	animal organ formation	0.057971	65/18800	9.50313e-05	0.000542539	0.000216796	MAPK1/BMP4/MAPK3/CTNNB1	4
GO:1905330	regulation of morphogenesis of an epithelium	0.057971	65/18800	9.50313e-05	0.000542539	0.000216796	HGF/BMP4/CTNNB1/VEGFA	4
GO:0050868	negative regulation of T cell activation	0.0724638	125/18800	9.58904e-05	0.000546492	0.000218376	BMP4/ERBB2/CASP3/HMGB1/IL10	5
GO:0045860	positive regulation of protein kinase activity	0.115942	396/18800	9.83092e-05	0.000559304	0.000223495	CDC6/TGFB1/ERBB2/EGFR/INSR/CDKN1A/VEGFA/PRKCD	8
GO:0060541	respiratory system development	0.0869565	203/18800	0.000100218	0.000568191	0.000227047	MAPK1/BMP4/MAPK3/CTNNB1/VEGFA/YWHAZ	6
GO:0071383	cellular response to steroid hormone stimulus	0.0869565	203/18800	0.000100218	0.000568191	0.000227047	PLAT/BMP4/PPARD/CFLAR/CASP9/PPARA	6
GO:0045662	negative regulation of myoblast differentiation	0.0434783	25/18800	0.000102707	0.000581294	0.000232282	TGFB1/BMP4/PPARD	3
GO:0043588	skin development	0.101449	296/18800	0.00010462	0.000591103	0.000236202	NGFR/IL1A/EGFR/CASP3/MET/CTNNB1/BCL2	7
GO:0007623	circadian rhythm	0.0869565	205/18800	0.00010576	0.00059549	0.000237955	NGFR/RELB/AHR/NTRK2/GSK3B/PPARA	6
GO:0032869	cellular response to insulin stimulus	0.0869565	205/18800	0.00010576	0.00059549	0.000237955	RB1/INSR/UCP2/CFLAR/GSK3B/PRKCD	6
GO:0002294	CD4-positive, alpha-beta T cell differentiation involved in immune response	0.057971	67/18800	0.000106994	0.000601403	0.000240318	RELB/STAT3/HMGB1/IL6	4
GO:0050714	positive regulation of protein secretion	0.0724638	128/18800	0.000107257	0.00060185	0.000240496	TGFB1/IL1A/PRKCE/PPARD/HIF1A	5
GO:0001101	response to acid chemical	0.0724638	129/18800	0.000111267	0.000622219	0.000248636	EGFR/NTRK2/BCL2L1/CASP3/VEGFA	5
GO:2000027	regulation of animal organ morphogenesis	0.0724638	129/18800	0.000111267	0.000622219	0.000248636	NGFR/HGF/BMP4/CTNNB1/VEGFA	5
GO:0002287	alpha-beta T cell activation involved in immune response	0.057971	68/18800	0.000113368	0.00063074	0.000252041	RELB/STAT3/HMGB1/IL6	4
GO:0002293	alpha-beta T cell differentiation involved in immune response	0.057971	68/18800	0.000113368	0.00063074	0.000252041	RELB/STAT3/HMGB1/IL6	4
GO:0042130	negative regulation of T cell proliferation	0.057971	68/18800	0.000113368	0.00063074	0.000252041	BMP4/ERBB2/CASP3/IL10	4
GO:0071902	positive regulation of protein serine/threonine kinase activity	0.0869565	208/18800	0.000114527	0.000636112	0.000254187	CDC6/TGFB1/ERBB2/EGFR/INSR/VEGFA	6
GO:0048641	regulation of skeletal muscle tissue development	0.0434783	26/18800	0.000115798	0.00063884	0.000255277	TGFB1/CTNNB1/BCL2	3
GO:0071549	cellular response to dexamethasone stimulus	0.0434783	26/18800	0.000115798	0.00063884	0.000255277	PLAT/CFLAR/CASP9	3
GO:1904353	regulation of telomere capping	0.0434783	26/18800	0.000115798	0.00063884	0.000255277	ERCC1/MAPK1/MAPK3	3
GO:1904385	cellular response to angiotensin	0.0434783	26/18800	0.000115798	0.00063884	0.000255277	CDC6/NFKB1/PRKCD	3
GO:0016051	carbohydrate biosynthetic process	0.0869565	209/18800	0.000117575	0.000647551	0.000258758	TGFB1/NFKB1/INSR/GSK3B/CRTC2/PPARA	6
GO:0032922	circadian regulation of gene expression	0.057971	69/18800	0.000120013	0.000659869	0.00026368	NGFR/RELB/AHR/PPARA	4
GO:0017038	protein import	0.0869565	210/18800	0.000120686	0.000662462	0.000264717	NFKBIA/TGFB1/BMP4/STAT3/CDKN1A/PRKCD	6
GO:0071333	cellular response to glucose stimulus	0.0724638	132/18800	0.000123989	0.00067832	0.000271053	ICAM1/PRKCE/PPARD/UCP2/HIF1A	5
GO:1900180	regulation of protein localization to nucleus	0.0724638	132/18800	0.000123989	0.00067832	0.000271053	NGFR/TGFB1/BMP4/GSK3B/PRKCD	5
GO:0002562	somatic diversification of immune receptors via germline recombination within a single locus	0.057971	70/18800	0.000126936	0.000692128	0.000276571	ERCC1/TGFB1/HMGB1/IL10	4
GO:0016444	somatic cell DNA recombination	0.057971	70/18800	0.000126936	0.000692128	0.000276571	ERCC1/TGFB1/HMGB1/IL10	4
GO:0002719	negative regulation of cytokine production involved in immune response	0.0434783	27/18800	0.000129931	0.00070494	0.000281691	HMOX1/TGFB1/IL10	3
GO:1900017	positive regulation of cytokine production involved in inflammatory response	0.0434783	27/18800	0.000129931	0.00070494	0.000281691	STAT3/IL6/HIF1A	3
GO:1902883	negative regulation of response to oxidative stress	0.0434783	27/18800	0.000129931	0.00070494	0.000281691	HGF/MET/IL10	3
GO:0006469	negative regulation of protein kinase activity	0.0869565	213/18800	0.000130416	0.000706401	0.000282274	BMP4/RB1/HMGCR/CASP3/CDKN1A/PRKCD	6
GO:0030198	extracellular matrix organization	0.101449	307/18800	0.000131179	0.000709363	0.000283458	TGFB1/MMP13/RB1/MMP3/CFLAR/MMP9/IL6	7
GO:0043467	regulation of generation of precursor metabolites and energy	0.0724638	134/18800	0.000133072	0.000716053	0.000286131	STAT3/INSR/GSK3B/HIF1A/PPARA	5
GO:0071331	cellular response to hexose stimulus	0.0724638	134/18800	0.000133072	0.000716053	0.000286131	ICAM1/PRKCE/PPARD/UCP2/HIF1A	5
GO:2001235	positive regulation of apoptotic signaling pathway	0.0724638	134/18800	0.000133072	0.000716053	0.000286131	NGFR/BAX/MCL1/PRKCD/BBC3	5
GO:0006913	nucleocytoplasmic transport	0.101449	308/18800	0.000133843	0.000716671	0.000286378	NFKBIA/TGFB1/BMP4/STAT3/GSK3B/CDKN1A/PRKCD	7
GO:0043062	extracellular structure organization	0.101449	308/18800	0.000133843	0.000716671	0.000286378	TGFB1/MMP13/RB1/MMP3/CFLAR/MMP9/IL6	7
GO:0051169	nuclear transport	0.101449	308/18800	0.000133843	0.000716671	0.000286378	NFKBIA/TGFB1/BMP4/STAT3/GSK3B/CDKN1A/PRKCD	7
GO:0051881	regulation of mitochondrial membrane potential	0.057971	71/18800	0.000134144	0.000717111	0.000286554	BAX/BCL2L1/UCP2/BCL2	4
GO:0045229	external encapsulating structure organization	0.101449	310/18800	0.000139302	0.000743473	0.000297088	TGFB1/MMP13/RB1/MMP3/CFLAR/MMP9/IL6	7
GO:0043491	protein kinase B signaling	0.0869565	216/18800	0.000140758	0.000750022	0.000299705	TGFB1/EGFR/NTRK2/INSR/MET/PPARA	6
GO:0072078	nephron tubule morphogenesis	0.057971	72/18800	0.000141644	0.000753516	0.000301102	BMP4/CTNNB1/BCL2/VEGFA	4
GO:0071326	cellular response to monosaccharide stimulus	0.0724638	136/18800	0.000142655	0.000756443	0.000302271	ICAM1/PRKCE/PPARD/UCP2/HIF1A	5
GO:0072175	epithelial tube formation	0.0724638	136/18800	0.000142655	0.000756443	0.000302271	TGFB1/BMP4/CASP3/CTNNB1/HIF1A	5
GO:0010810	regulation of cell-substrate adhesion	0.0869565	217/18800	0.000144346	0.000763445	0.000305069	VCL/SERPINE1/PRKCE/GSK3B/BCL2/VEGFA	6
GO:0002360	T cell lineage commitment	0.0434783	28/18800	0.000145141	0.000763445	0.000305069	STAT3/BCL2/IL6	3
GO:0050996	positive regulation of lipid catabolic process	0.0434783	28/18800	0.000145141	0.000763445	0.000305069	PRKCE/PPARA/PRKCD	3
GO:1903205	regulation of hydrogen peroxide-induced cell death	0.0434783	28/18800	0.000145141	0.000763445	0.000305069	HGF/MET/IL10	3
GO:1903672	positive regulation of sprouting angiogenesis	0.0434783	28/18800	0.000145141	0.000763445	0.000305069	IL10/VEGFA/SMAD1	3
GO:0016239	positive regulation of macroautophagy	0.057971	73/18800	0.000149442	0.000782304	0.000312605	HMOX1/MAPK3/HIF1A/TBK1	4
GO:0048662	negative regulation of smooth muscle cell proliferation	0.057971	73/18800	0.000149442	0.000782304	0.000312605	HMOX1/PPARD/CDKN1A/IL10	4
GO:2000573	positive regulation of DNA biosynthetic process	0.057971	73/18800	0.000149442	0.000782304	0.000312605	MAPK1/HGF/MAPK3/CTNNB1	4
GO:0000271	polysaccharide biosynthetic process	0.057971	74/18800	0.000157547	0.000822105	0.000328509	TGFB1/NFKB1/INSR/GSK3B	4
GO:0072088	nephron epithelium morphogenesis	0.057971	74/18800	0.000157547	0.000822105	0.000328509	BMP4/CTNNB1/BCL2/VEGFA	4
GO:0001773	myeloid dendritic cell activation	0.0434783	29/18800	0.000161463	0.000839863	0.000335605	RELB/HMGB1/IL10	3
GO:0010464	regulation of mesenchymal cell proliferation	0.0434783	29/18800	0.000161463	0.000839863	0.000335605	CHRD/BMP4/CTNNB1	3
GO:0050769	positive regulation of neurogenesis	0.0869565	222/18800	0.000163391	0.000844585	0.000337492	TGFB1/NTRK2/CTNNB1/IL6/HIF1A/VEGFA	6
GO:0007272	ensheathment of neurons	0.0724638	140/18800	0.000163402	0.000844585	0.000337492	HGF/ERBB2/NTRK2/PPARD/CTNNB1	5
GO:0008366	axon ensheathment	0.0724638	140/18800	0.000163402	0.000844585	0.000337492	HGF/ERBB2/NTRK2/PPARD/CTNNB1	5
GO:0072073	kidney epithelium development	0.0724638	140/18800	0.000163402	0.000844585	0.000337492	BMP4/CTNNB1/BCL2/VEGFA/SMAD1	5
GO:0002534	cytokine production involved in inflammatory response	0.057971	75/18800	0.000165965	0.000853795	0.000341172	STAT3/IL6/HIF1A/PPARA	4
GO:0070227	lymphocyte apoptotic process	0.057971	75/18800	0.000165965	0.000853795	0.000341172	BMP4/BAX/IL10/HIF1A	4
GO:1900015	regulation of cytokine production involved in inflammatory response	0.057971	75/18800	0.000165965	0.000853795	0.000341172	STAT3/IL6/HIF1A/PPARA	4
GO:0033157	regulation of intracellular protein transport	0.0869565	224/18800	0.000171544	0.000881112	0.000352088	TGFB1/BMP4/ERBB2/GSK3B/PRKCD/BBC3	6
GO:0007409	axonogenesis	0.115942	430/18800	0.000173162	0.000888031	0.000354853	NGFR/VCL/ERBB2/NTRK2/GSK3B/SPP1/BCL2/VEGFA	8
GO:0030183	B cell differentiation	0.0724638	142/18800	0.000174602	0.000891748	0.000356338	BAX/STAT5B/BCL2/IL6/IL10	5
GO:0002292	T cell differentiation involved in immune response	0.057971	76/18800	0.000174703	0.000891748	0.000356338	RELB/STAT3/HMGB1/IL6	4
GO:0061333	renal tubule morphogenesis	0.057971	76/18800	0.000174703	0.000891748	0.000356338	BMP4/CTNNB1/BCL2/VEGFA	4
GO:0000082	G1/S transition of mitotic cell cycle	0.0869565	225/18800	0.000175739	0.000895203	0.000357719	CDC6/CDK2/RB1/EGFR/BCL2/CDKN1A	6
GO:0072594	establishment of protein localization to organelle	0.115942	431/18800	0.000175926	0.000895203	0.000357719	NFKBIA/TGFB1/BMP4/STAT3/BAX/CDKN1A/PRKCD/BBC3	8
GO:0031069	hair follicle morphogenesis	0.0434783	30/18800	0.000178932	0.00090768	0.000362705	NGFR/CTNNB1/BCL2	3
GO:1990776	response to angiotensin	0.0434783	30/18800	0.000178932	0.00090768	0.000362705	CDC6/NFKB1/PRKCD	3
GO:0072028	nephron morphogenesis	0.057971	77/18800	0.000183769	0.000930774	0.000371933	BMP4/CTNNB1/BCL2/VEGFA	4
GO:0007612	learning	0.0724638	145/18800	0.000192492	0.000970455	0.000387789	NTRK2/HMGCR/INSR/FOS/HIF1A	5
GO:0050729	positive regulation of inflammatory response	0.0724638	145/18800	0.000192492	0.000970455	0.000387789	NFKBIA/LBP/SERPINE1/STAT5B/IL6	5
GO:0072006	nephron development	0.0724638	145/18800	0.000192492	0.000970455	0.000387789	BMP4/CFLAR/CTNNB1/BCL2/VEGFA	5
GO:0010039	response to iron ion	0.0434783	31/18800	0.000197584	0.000993071	0.000396827	HMOX1/BCL2/HIF1A	3
GO:0061311	cell surface receptor signaling pathway involved in heart development	0.0434783	31/18800	0.000197584	0.000993071	0.000396827	TGFB1/BMP4/CTNNB1	3
GO:0062013	positive regulation of small molecule metabolic process	0.0724638	146/18800	0.000198755	0.000997429	0.000398568	INSR/PRKCE/PPARD/HIF1A/PPARA	5
GO:0051960	regulation of nervous system development	0.115942	440/18800	0.000202485	0.00101209	0.000404426	TGFB1/HGF/NTRK2/CTNNB1/SPP1/IL6/HIF1A/VEGFA	8
GO:0046883	regulation of hormone secretion	0.0869565	231/18800	0.000202648	0.00101209	0.000404426	PRKCE/PPARD/UCP2/SPP1/IL6/HIF1A	6
GO:0014068	positive regulation of phosphatidylinositol 3-kinase signaling	0.057971	79/18800	0.000202912	0.00101209	0.000404426	HGF/NTRK2/INSR/PPARD	4
GO:0048708	astrocyte differentiation	0.057971	79/18800	0.000202912	0.00101209	0.000404426	MAPK1/MAPK3/STAT3/IL6	4
GO:0043010	camera-type eye development	0.101449	330/18800	0.000204527	0.00101859	0.000407025	BMP4/EGFR/NTRK2/BAX/CTNNB1/HIF1A/VEGFA	7
GO:0050796	regulation of insulin secretion	0.0724638	147/18800	0.000205173	0.00101872	0.000407074	PRKCE/PPARD/UCP2/IL6/HIF1A	5
GO:0071322	cellular response to carbohydrate stimulus	0.0724638	147/18800	0.000205173	0.00101872	0.000407074	ICAM1/PRKCE/PPARD/UCP2/HIF1A	5
GO:0001570	vasculogenesis	0.057971	80/18800	0.000213004	0.00105123	0.000420065	TGFB1/NTRK2/CTNNB1/VEGFA	4
GO:0002200	somatic diversification of immune receptors	0.057971	80/18800	0.000213004	0.00105123	0.000420065	ERCC1/TGFB1/HMGB1/IL10	4
GO:0003151	outflow tract morphogenesis	0.057971	80/18800	0.000213004	0.00105123	0.000420065	BMP4/CTNNB1/HIF1A/VEGFA	4
GO:0032204	regulation of telomere maintenance	0.057971	80/18800	0.000213004	0.00105123	0.000420065	ERCC1/MAPK1/MAPK3/CTNNB1	4
GO:0003180	aortic valve morphogenesis	0.0434783	32/18800	0.000217452	0.00106675	0.000426268	TGFB1/BMP4/RB1	3
GO:0010743	regulation of macrophage derived foam cell differentiation	0.0434783	32/18800	0.000217452	0.00106675	0.000426268	NFKBIA/NFKB1/PPARA	3
GO:0036474	cell death in response to hydrogen peroxide	0.0434783	32/18800	0.000217452	0.00106675	0.000426268	HGF/MET/IL10	3
GO:0060795	cell fate commitment involved in formation of primary germ layer	0.0434783	32/18800	0.000217452	0.00106675	0.000426268	BMP4/CTNNB1/SMAD1	3
GO:0007517	muscle organ development	0.101449	334/18800	0.000220139	0.00107832	0.000430892	TGFB1/BMP4/RB1/FOS/CFLAR/CTNNB1/BCL2	7
GO:0007160	cell-matrix adhesion	0.0869565	235/18800	0.000222325	0.0010874	0.000434521	VCL/SERPINE1/GSK3B/CTNNB1/BCL2/VEGFA	6
GO:0006096	glycolytic process	0.057971	81/18800	0.000223453	0.00108966	0.000435425	STAT3/INSR/HIF1A/PPARA	4
GO:0045445	myoblast differentiation	0.057971	81/18800	0.000223453	0.00108966	0.000435425	TGFB1/BMP4/RB1/PPARD	4
GO:0007584	response to nutrient	0.0724638	150/18800	0.000225378	0.00109255	0.000436579	ERCC1/HMOX1/IL1A/PPARD/SPP1	5
GO:0010675	regulation of cellular carbohydrate metabolic process	0.0724638	150/18800	0.000225378	0.00109255	0.000436579	STAT3/INSR/PRKCE/GSK3B/PPARA	5
GO:0016331	morphogenesis of embryonic epithelium	0.0724638	150/18800	0.000225378	0.00109255	0.000436579	TGFB1/BMP4/CASP3/CTNNB1/HIF1A	5
GO:0043535	regulation of blood vessel endothelial cell migration	0.0724638	150/18800	0.000225378	0.00109255	0.000436579	HMOX1/TGFB1/HMGB1/HIF1A/VEGFA	5
GO:0033673	negative regulation of kinase activity	0.0869565	236/18800	0.000227472	0.00110107	0.000439984	BMP4/RB1/HMGCR/CASP3/CDKN1A/PRKCD	6
GO:0006757	ATP generation from ADP	0.057971	82/18800	0.000234266	0.00113062	0.000451789	STAT3/INSR/HIF1A/PPARA	4
GO:0043367	CD4-positive, alpha-beta T cell differentiation	0.057971	82/18800	0.000234266	0.00113062	0.000451789	RELB/STAT3/HMGB1/IL6	4
GO:0045648	positive regulation of erythrocyte differentiation	0.0434783	33/18800	0.000238569	0.00114969	0.000459412	STAT3/STAT5B/HIF1A	3
GO:0023061	signal release	0.115942	451/18800	0.000239344	0.00115173	0.000460227	IL1A/PRKCE/PPARD/UCP2/GSK3B/SPP1/IL6/HIF1A	8
GO:0014032	neural crest cell development	0.057971	83/18800	0.00024545	0.00117766	0.000470586	MAPK1/BMP4/MAPK3/HIF1A	4
GO:0060395	SMAD protein signal transduction	0.057971	83/18800	0.00024545	0.00117766	0.000470586	TGFB1/BMP4/FOS/SMAD1	4
GO:0048754	branching morphogenesis of an epithelial tube	0.0724638	153/18800	0.000247065	0.00118195	0.0004723	BMP4/MET/CTNNB1/BCL2/VEGFA	5
GO:0051147	regulation of muscle cell differentiation	0.0724638	153/18800	0.000247065	0.00118195	0.0004723	TGFB1/BMP4/BCL2/PPARA/SMAD1	5
GO:0021915	neural tube development	0.0724638	154/18800	0.000254636	0.00121639	0.000486063	CHRD/TGFB1/BMP4/CASP3/HIF1A	5
GO:0050672	negative regulation of lymphocyte proliferation	0.057971	84/18800	0.000257014	0.00122596	0.000489888	BMP4/ERBB2/CASP3/IL10	4
GO:0007435	salivary gland morphogenesis	0.0434783	34/18800	0.000260971	0.00123228	0.000492412	TGFB1/HGF/EGFR	3
GO:0032212	positive regulation of telomere maintenance via telomerase	0.0434783	34/18800	0.000260971	0.00123228	0.000492412	MAPK1/MAPK3/CTNNB1	3
GO:0043276	anoikis	0.0434783	34/18800	0.000260971	0.00123228	0.000492412	NTRK2/MCL1/BCL2	3
GO:0048730	epidermis morphogenesis	0.0434783	34/18800	0.000260971	0.00123228	0.000492412	NGFR/CTNNB1/BCL2	3
GO:0051973	positive regulation of telomerase activity	0.0434783	34/18800	0.000260971	0.00123228	0.000492412	MAPK1/MAPK3/CTNNB1	3
GO:0110110	positive regulation of animal organ morphogenesis	0.0434783	34/18800	0.000260971	0.00123228	0.000492412	NGFR/BMP4/CTNNB1	3
GO:1902692	regulation of neuroblast proliferation	0.0434783	34/18800	0.000260971	0.00123228	0.000492412	CTNNB1/HIF1A/VEGFA	3
GO:0032945	negative regulation of mononuclear cell proliferation	0.057971	85/18800	0.000268964	0.00126094	0.000503865	BMP4/ERBB2/CASP3/IL10	4
GO:0071229	cellular response to acid chemical	0.057971	85/18800	0.000268964	0.00126094	0.000503865	EGFR/NTRK2/BCL2L1/VEGFA	4
GO:0098586	cellular response to virus	0.057971	85/18800	0.000268964	0.00126094	0.000503865	NFKB1/BAX/IL6/HIF1A	4
GO:2000106	regulation of leukocyte apoptotic process	0.057971	85/18800	0.000268964	0.00126094	0.000503865	BMP4/BAX/IL10/HIF1A	4
GO:2000243	positive regulation of reproductive process	0.057971	85/18800	0.000268964	0.00126094	0.000503865	PLAT/INSR/CTNNB1/VEGFA	4
GO:0090316	positive regulation of intracellular protein transport	0.0724638	156/18800	0.000270305	0.00126541	0.000505654	TGFB1/ERBB2/GSK3B/PRKCD/BBC3	5
GO:0055067	monovalent inorganic cation homeostasis	0.0724638	157/18800	0.000278409	0.00130149	0.000520071	MAPK1/MAPK3/IL1A/BCL2/NEDD4L	5
GO:0002312	B cell activation involved in immune response	0.057971	86/18800	0.000281309	0.00130759	0.000522506	ERCC1/TGFB1/IL6/IL10	4
GO:1900542	regulation of purine nucleotide metabolic process	0.057971	86/18800	0.000281309	0.00130759	0.000522506	STAT3/INSR/HIF1A/PPARA	4
GO:1904705	regulation of vascular associated smooth muscle cell proliferation	0.057971	86/18800	0.000281309	0.00130759	0.000522506	HMOX1/MMP9/CDKN1A/IL10	4
GO:2000134	negative regulation of G1/S transition of mitotic cell cycle	0.057971	86/18800	0.000281309	0.00130759	0.000522506	CDK2/RB1/BCL2/CDKN1A	4
GO:0035633	maintenance of blood-brain barrier	0.0434783	35/18800	0.000284688	0.00131583	0.000525799	VCL/IL6/VEGFA	3
GO:0097345	mitochondrial outer membrane permeabilization	0.0434783	35/18800	0.000284688	0.00131583	0.000525799	BAX/GSK3B/BBC3	3
GO:1904031	positive regulation of cyclin-dependent protein kinase activity	0.0434783	35/18800	0.000284688	0.00131583	0.000525799	CDC6/EGFR/CDKN1A	3
GO:1905207	regulation of cardiocyte differentiation	0.0434783	35/18800	0.000284688	0.00131583	0.000525799	TGFB1/BMP4/EGFR	3
GO:0016241	regulation of macroautophagy	0.0724638	158/18800	0.000286697	0.00132139	0.00052802	HMOX1/MAPK3/CASP3/HIF1A/TBK1	5
GO:0046631	alpha-beta T cell activation	0.0724638	158/18800	0.000286697	0.00132139	0.00052802	RELB/STAT3/HMGB1/BCL2/IL6	5
GO:0090068	positive regulation of cell cycle process	0.0869565	247/18800	0.000290537	0.0013372	0.000534341	CDC6/IL1A/RB1/EGFR/INSR/PRKCE	6
GO:0045861	negative regulation of proteolysis	0.101449	350/18800	0.000292518	0.00134444	0.00053723	TIMP1/PLAT/HGF/SERPINE1/MMP9/IL10/VEGFA	7
GO:0001892	embryonic placenta development	0.057971	87/18800	0.000294055	0.00134772	0.000538542	MAPK1/EGFR/IL10/HIF1A	4
GO:1990874	vascular associated smooth muscle cell proliferation	0.057971	87/18800	0.000294055	0.00134772	0.000538542	HMOX1/MMP9/CDKN1A/IL10	4
GO:0002699	positive regulation of immune effector process	0.0869565	248/18800	0.000296889	0.00135881	0.000542972	HMOX1/LBP/TGFB1/STAT5B/IL6/IL10	6
GO:0006140	regulation of nucleotide metabolic process	0.057971	88/18800	0.000307211	0.00140018	0.000559506	STAT3/INSR/HIF1A/PPARA	4
GO:0046849	bone remodeling	0.057971	88/18800	0.000307211	0.00140018	0.000559506	TGFB1/CTNNB1/SPP1/IL6	4
GO:0048864	stem cell development	0.057971	88/18800	0.000307211	0.00140018	0.000559506	MAPK1/BMP4/MAPK3/HIF1A	4
GO:0007431	salivary gland development	0.0434783	36/18800	0.000309754	0.00140591	0.000561794	TGFB1/HGF/EGFR	3
GO:0043368	positive T cell selection	0.0434783	36/18800	0.000309754	0.00140591	0.000561794	STAT3/BCL2/IL6	3
GO:1905332	positive regulation of morphogenesis of an epithelium	0.0434783	36/18800	0.000309754	0.00140591	0.000561794	BMP4/CTNNB1/VEGFA	3
GO:0051250	negative regulation of lymphocyte activation	0.0724638	161/18800	0.000312687	0.00141725	0.000566328	BMP4/ERBB2/CASP3/HMGB1/IL10	5
GO:0001942	hair follicle development	0.057971	89/18800	0.000320783	0.00144794	0.000578592	NGFR/EGFR/CTNNB1/BCL2	4
GO:0007589	body fluid secretion	0.057971	89/18800	0.000320783	0.00144794	0.000578592	STAT5B/PRKCE/HIF1A/VEGFA	4
GO:1903578	regulation of ATP metabolic process	0.057971	89/18800	0.000320783	0.00144794	0.000578592	STAT3/INSR/HIF1A/PPARA	4
GO:0030509	BMP signaling pathway	0.0724638	162/18800	0.000321735	0.00145024	0.00057951	CHRD/TGFB1/BMP4/MAPK3/SMAD1	5
GO:0071560	cellular response to transforming growth factor beta stimulus	0.0869565	252/18800	0.000323396	0.00145573	0.000581701	TGFB1/STAT3/FOS/CFLAR/PPARA/SMAD1	6
GO:0030307	positive regulation of cell growth	0.0724638	163/18800	0.000330981	0.00148579	0.000593714	ERBB2/EGFR/BCL2/VEGFA/NEDD4L	5
GO:0050680	negative regulation of epithelial cell proliferation	0.0724638	163/18800	0.000330981	0.00148579	0.000593714	NGFR/TGFB1/BMP4/RB1/PPARD	5
GO:0046031	ADP metabolic process	0.057971	90/18800	0.000334781	0.00150079	0.000599708	STAT3/INSR/HIF1A/PPARA	4
GO:0003176	aortic valve development	0.0434783	37/18800	0.000336202	0.001501	0.000599792	TGFB1/BMP4/RB1	3
GO:1903580	positive regulation of ATP metabolic process	0.0434783	37/18800	0.000336202	0.001501	0.000599792	INSR/HIF1A/PPARA	3
GO:1904358	positive regulation of telomere maintenance via telomere lengthening	0.0434783	37/18800	0.000336202	0.001501	0.000599792	MAPK1/MAPK3/CTNNB1	3
GO:0003007	heart morphogenesis	0.0869565	254/18800	0.000337328	0.00150194	0.000600167	TGFB1/BMP4/INSR/CTNNB1/HIF1A/VEGFA	6
GO:0043122	regulation of I-kappaB kinase/NF-kappaB signaling	0.0869565	254/18800	0.000337328	0.00150194	0.000600167	HMOX1/IL1A/PRKCE/CFLAR/CTNNB1/TBK1	6
GO:0001764	neuron migration	0.0724638	164/18800	0.000340427	0.00151368	0.000604857	STAT3/NTRK2/BAX/CTNNB1/VEGFA	5
GO:0044843	cell cycle G1/S phase transition	0.0869565	255/18800	0.000344469	0.00152957	0.00061121	CDC6/CDK2/RB1/EGFR/BCL2/CDKN1A	6
GO:0014909	smooth muscle cell migration	0.057971	91/18800	0.000349211	0.00154227	0.000616283	PLAT/SERPINE1/PPARD/BCL2	4
GO:0070664	negative regulation of leukocyte proliferation	0.057971	91/18800	0.000349211	0.00154227	0.000616283	BMP4/ERBB2/CASP3/IL10	4
GO:0072080	nephron tubule development	0.057971	91/18800	0.000349211	0.00154227	0.000616283	BMP4/CTNNB1/BCL2/VEGFA	4
GO:0097306	cellular response to alcohol	0.057971	91/18800	0.000349211	0.00154227	0.000616283	AHR/UCP1/PRKCE/CTNNB1	4
GO:0050767	regulation of neurogenesis	0.101449	361/18800	0.000352567	0.001555	0.000621369	TGFB1/NTRK2/CTNNB1/SPP1/IL6/HIF1A/VEGFA	7
GO:0002701	negative regulation of production of molecular mediator of immune response	0.0434783	38/18800	0.000364063	0.00159504	0.000637371	HMOX1/TGFB1/IL10	3
GO:0002065	columnar/cuboidal epithelial cell differentiation	0.057971	92/18800	0.00036408	0.00159504	0.000637371	SERPINE1/BMP4/GSK3B/HIF1A	4
GO:0022404	molting cycle process	0.057971	92/18800	0.00036408	0.00159504	0.000637371	NGFR/EGFR/CTNNB1/BCL2	4
GO:0022405	hair cycle process	0.057971	92/18800	0.00036408	0.00159504	0.000637371	NGFR/EGFR/CTNNB1/BCL2	4
GO:1903035	negative regulation of response to wounding	0.057971	92/18800	0.00036408	0.00159504	0.000637371	PLAT/SERPINE1/SPP1/PRKCD	4
GO:0071559	response to transforming growth factor beta	0.0869565	258/18800	0.000366604	0.00160395	0.000640933	TGFB1/STAT3/FOS/CFLAR/PPARA/SMAD1	6
GO:0002764	immune response-regulating signaling pathway	0.115942	482/18800	0.000373876	0.00163359	0.000652775	MAPK1/NFKBIA/LBP/BAX/PRKCE/HMGB1/BCL2/PRKCD	8
GO:0060993	kidney morphogenesis	0.057971	93/18800	0.000379398	0.00165331	0.000660654	BMP4/CTNNB1/BCL2/VEGFA	4
GO:0098773	skin epidermis development	0.057971	93/18800	0.000379398	0.00165331	0.000660654	NGFR/EGFR/CTNNB1/BCL2	4
GO:0060828	regulation of canonical Wnt signaling pathway	0.0869565	261/18800	0.00038984	0.00169655	0.000677935	TBL1X/TGFB1/NFKB1/EGFR/GSK3B/CTNNB1	6
GO:1901031	regulation of response to reactive oxygen species	0.0434783	39/18800	0.000393367	0.00170964	0.000683162	HGF/MET/IL10	3
GO:0019221	cytokine-mediated signaling pathway	0.115942	486/18800	0.000395019	0.00171067	0.000683575	NFKBIA/MAPK3/IL1A/STAT3/STAT5B/IL6/HIF1A/TBK1	8
GO:0061326	renal tubule development	0.057971	94/18800	0.000395171	0.00171067	0.000683575	BMP4/CTNNB1/BCL2/VEGFA	4
GO:1905954	positive regulation of lipid localization	0.057971	94/18800	0.000395171	0.00171067	0.000683575	NFKB1/IL1A/SPP1/PRKCD	4
GO:0014033	neural crest cell differentiation	0.057971	95/18800	0.000411408	0.00177861	0.000710723	MAPK1/BMP4/MAPK3/HIF1A	4
GO:1990138	neuron projection extension	0.0724638	172/18800	0.000423539	0.00182645	0.000729843	VCL/GSK3B/CTNNB1/VEGFA/NEDD4L	5
GO:0016233	telomere capping	0.0434783	40/18800	0.000424148	0.00182645	0.000729843	ERCC1/MAPK1/MAPK3	3
GO:0071392	cellular response to estradiol stimulus	0.0434783	40/18800	0.000424148	0.00182645	0.000729843	EGFR/CFLAR/IL10	3
GO:0014020	primary neural tube formation	0.057971	96/18800	0.000428116	0.00183871	0.000734739	TGFB1/BMP4/CASP3/HIF1A	4
GO:0051153	regulation of striated muscle cell differentiation	0.057971	96/18800	0.000428116	0.00183871	0.000734739	TGFB1/BMP4/BCL2/PPARA	4
GO:0002822	regulation of adaptive immune response based on somatic recombination of immune receptors built from immunoglobulin superfamily domains	0.0724638	173/18800	0.000434915	0.00185817	0.000742517	TGFB1/AHR/HMGB1/IL6/IL10	5
GO:0010469	regulation of signaling receptor activity	0.0724638	173/18800	0.000434915	0.00185817	0.000742517	SERPINE1/IL10/HIF1A/PPARA/PRKCD	5
GO:0071772	response to BMP	0.0724638	173/18800	0.000434915	0.00185817	0.000742517	CHRD/TGFB1/BMP4/MAPK3/SMAD1	5
GO:0071773	cellular response to BMP stimulus	0.0724638	173/18800	0.000434915	0.00185817	0.000742517	CHRD/TGFB1/BMP4/MAPK3/SMAD1	5
GO:0045807	positive regulation of endocytosis	0.057971	97/18800	0.000445302	0.0018976	0.000758273	SERPINE1/INSR/VEGFA/NEDD4L	4
GO:1902807	negative regulation of cell cycle G1/S phase transition	0.057971	97/18800	0.000445302	0.0018976	0.000758273	CDK2/RB1/BCL2/CDKN1A	4
GO:0010817	regulation of hormone levels	0.115942	496/18800	0.000452175	0.00192439	0.000768976	NFKB1/STAT5B/PRKCE/PPARD/UCP2/SPP1/IL6/HIF1A	8
GO:0010463	mesenchymal cell proliferation	0.0434783	41/18800	0.000456434	0.00192998	0.000771211	CHRD/BMP4/CTNNB1	3
GO:0071548	response to dexamethasone	0.0434783	41/18800	0.000456434	0.00192998	0.000771211	PLAT/CFLAR/CASP9	3
GO:0150077	regulation of neuroinflammatory response	0.0434783	41/18800	0.000456434	0.00192998	0.000771211	MMP3/MMP9/IL6	3
GO:1902110	positive regulation of mitochondrial membrane permeability involved in apoptotic process	0.0434783	41/18800	0.000456434	0.00192998	0.000771211	BAX/GSK3B/BBC3	3
GO:1905314	semi-lunar valve development	0.0434783	41/18800	0.000456434	0.00192998	0.000771211	TGFB1/BMP4/RB1	3
GO:0043534	blood vessel endothelial cell migration	0.0724638	175/18800	0.000458359	0.00193562	0.000773465	HMOX1/TGFB1/HMGB1/HIF1A/VEGFA	5
GO:0000079	regulation of cyclin-dependent protein serine/threonine kinase activity	0.057971	98/18800	0.000462976	0.00195009	0.000779248	CDC6/EGFR/CASP3/CDKN1A	4
GO:0002718	regulation of cytokine production involved in immune response	0.057971	98/18800	0.000462976	0.00195009	0.000779248	HMOX1/TGFB1/IL6/IL10	4
GO:0051962	positive regulation of nervous system development	0.0869565	270/18800	0.000466529	0.00196254	0.000784221	TGFB1/NTRK2/CTNNB1/IL6/HIF1A/VEGFA	6
GO:0006165	nucleoside diphosphate phosphorylation	0.057971	99/18800	0.000481145	0.00201884	0.000806717	STAT3/INSR/HIF1A/PPARA	4
GO:0019233	sensory perception of pain	0.057971	99/18800	0.000481145	0.00201884	0.000806717	TRPA1/MAPK3/IL1A/IL10	4
GO:0090276	regulation of peptide hormone secretion	0.0724638	177/18800	0.000482743	0.00202295	0.000808362	PRKCE/PPARD/UCP2/IL6/HIF1A	5
GO:0030574	collagen catabolic process	0.0434783	42/18800	0.000490256	0.00204139	0.000815728	MMP13/MMP3/MMP9	3
GO:0034142	toll-like receptor 4 signaling pathway	0.0434783	42/18800	0.000490256	0.00204139	0.000815728	NFKBIA/LBP/PRKCE	3
GO:0050999	regulation of nitric-oxide synthase activity	0.0434783	42/18800	0.000490256	0.00204139	0.000815728	IL1A/EGFR/HIF1A	3
GO:0071354	cellular response to interleukin-6	0.0434783	42/18800	0.000490256	0.00204139	0.000815728	NFKB1/STAT3/IL6	3
GO:1904706	negative regulation of vascular associated smooth muscle cell proliferation	0.0434783	42/18800	0.000490256	0.00204139	0.000815728	HMOX1/CDKN1A/IL10	3
GO:0002367	cytokine production involved in immune response	0.057971	100/18800	0.000499816	0.00207591	0.000829525	HMOX1/TGFB1/IL6/IL10	4
GO:0046939	nucleotide phosphorylation	0.057971	100/18800	0.000499816	0.00207591	0.000829525	STAT3/INSR/HIF1A/PPARA	4
GO:1903532	positive regulation of secretion by cell	0.0869565	274/18800	0.000504178	0.00209138	0.000835707	TGFB1/IL1A/PRKCE/PPARD/SPP1/HIF1A	6
GO:0030073	insulin secretion	0.0724638	179/18800	0.000508093	0.00210495	0.00084113	PRKCE/PPARD/UCP2/IL6/HIF1A	5
GO:1904029	regulation of cyclin-dependent protein kinase activity	0.057971	101/18800	0.000518997	0.00214742	0.000858098	CDC6/EGFR/CASP3/CDKN1A	4
GO:0002791	regulation of peptide secretion	0.0724638	180/18800	0.000521137	0.00215355	0.000860549	PRKCE/PPARD/UCP2/IL6/HIF1A	5
GO:0001709	cell fate determination	0.0434783	43/18800	0.000525645	0.00216615	0.000865583	BMP4/CTNNB1/MCL1	3
GO:1902686	mitochondrial outer membrane permeabilization involved in programmed cell death	0.0434783	43/18800	0.000525645	0.00216615	0.000865583	BAX/GSK3B/BBC3	3
GO:0002253	activation of immune response	0.101449	386/18800	0.000526169	0.00216615	0.000865583	MAPK1/BAX/PRKCE/HMGB1/BCL2/PRKCD/TBK1	7
GO:0001701	in utero embryonic development	0.101449	387/18800	0.000534317	0.00219466	0.000876974	MAPK1/EGFR/BCL2L1/CTNNB1/IL10/HIF1A/VEGFA	7
GO:0045619	regulation of lymphocyte differentiation	0.0724638	181/18800	0.000534432	0.00219466	0.000876974	BMP4/ERBB2/STAT5B/HMGB1/IL10	5
GO:0010717	regulation of epithelial to mesenchymal transition	0.057971	102/18800	0.000538697	0.00220388	0.000880662	TGFB1/BMP4/CTNNB1/IL6	4
GO:0035710	CD4-positive, alpha-beta T cell activation	0.057971	102/18800	0.000538697	0.00220388	0.000880662	RELB/STAT3/HMGB1/IL6	4
GO:1902106	negative regulation of leukocyte differentiation	0.057971	102/18800	0.000538697	0.00220388	0.000880662	BMP4/ERBB2/CTNNB1/HMGB1	4
GO:0006839	mitochondrial transport	0.0724638	182/18800	0.000547981	0.00223907	0.000894722	BAX/BCL2L1/GSK3B/BCL2/BBC3	5
GO:0009135	purine nucleoside diphosphate metabolic process	0.057971	103/18800	0.000558924	0.00225948	0.000902878	STAT3/INSR/HIF1A/PPARA	4
GO:0009179	purine ribonucleoside diphosphate metabolic process	0.057971	103/18800	0.000558924	0.00225948	0.000902878	STAT3/INSR/HIF1A/PPARA	4
GO:0042102	positive regulation of T cell proliferation	0.057971	103/18800	0.000558924	0.00225948	0.000902878	IL1A/STAT5B/HMGB1/IL6	4
GO:1903076	regulation of protein localization to plasma membrane	0.057971	103/18800	0.000558924	0.00225948	0.000902878	TGFB1/EGFR/BCL2L1/PRKCE	4
GO:1905477	positive regulation of protein localization to membrane	0.057971	103/18800	0.000558924	0.00225948	0.000902878	ERBB2/EGFR/PRKCE/BBC3	4
GO:0048469	cell maturation	0.0724638	183/18800	0.000561787	0.00225948	0.000902878	RB1/CTNNB1/BCL2/HIF1A/VEGFA	5
GO:0055001	muscle cell development	0.0724638	183/18800	0.000561787	0.00225948	0.000902878	BMP4/CFLAR/BCL2/VEGFA/PPARA	5
GO:0090087	regulation of peptide transport	0.0724638	183/18800	0.000561787	0.00225948	0.000902878	PRKCE/PPARD/UCP2/IL6/HIF1A	5
GO:1901991	negative regulation of mitotic cell cycle phase transition	0.0724638	183/18800	0.000561787	0.00225948	0.000902878	CDC6/CDK2/RB1/BCL2/CDKN1A	5
GO:0002066	columnar/cuboidal epithelial cell development	0.0434783	44/18800	0.00056263	0.00225948	0.000902878	BMP4/GSK3B/HIF1A	3
GO:0007595	lactation	0.0434783	44/18800	0.00056263	0.00225948	0.000902878	STAT5B/HIF1A/VEGFA	3
GO:0045840	positive regulation of mitotic nuclear division	0.0434783	44/18800	0.00056263	0.00225948	0.000902878	IL1A/RB1/INSR	3
GO:0045981	positive regulation of nucleotide metabolic process	0.0434783	44/18800	0.00056263	0.00225948	0.000902878	INSR/HIF1A/PPARA	3
GO:1900544	positive regulation of purine nucleotide metabolic process	0.0434783	44/18800	0.00056263	0.00225948	0.000902878	INSR/HIF1A/PPARA	3
GO:0046879	hormone secretion	0.0869565	281/18800	0.000575729	0.00230693	0.000921839	PRKCE/PPARD/UCP2/SPP1/IL6/HIF1A	6
GO:0097696	receptor signaling pathway via STAT	0.0724638	184/18800	0.000575853	0.00230693	0.000921839	TGFB1/STAT3/STAT5B/IL6/IL10	5
GO:0009615	response to virus	0.101449	392/18800	0.000576585	0.00230705	0.000921884	NFKB1/BAX/BCL2L1/BCL2/IL6/HIF1A/TBK1	7
GO:0001841	neural tube formation	0.057971	104/18800	0.000579685	0.00231098	0.000923457	TGFB1/BMP4/CASP3/HIF1A	4
GO:0014812	muscle cell migration	0.057971	104/18800	0.000579685	0.00231098	0.000923457	PLAT/SERPINE1/PPARD/BCL2	4
GO:0046822	regulation of nucleocytoplasmic transport	0.057971	104/18800	0.000579685	0.00231098	0.000923457	TGFB1/BMP4/GSK3B/PRKCD	4
GO:0010749	regulation of nitric oxide mediated signal transduction	0.0289855	10/18800	0.000586165	0.00231988	0.000927014	EGFR/VEGFA	2
GO:0032025	response to cobalt ion	0.0289855	10/18800	0.000586165	0.00231988	0.000927014	CASP3/CASP9	2
GO:0032070	regulation of deoxyribonuclease activity	0.0289855	10/18800	0.000586165	0.00231988	0.000927014	HMGB1/PRKCD	2
GO:0060397	growth hormone receptor signaling pathway via JAK-STAT	0.0289855	10/18800	0.000586165	0.00231988	0.000927014	STAT3/STAT5B	2
GO:0072124	regulation of glomerular mesangial cell proliferation	0.0289855	10/18800	0.000586165	0.00231988	0.000927014	BMP4/CFLAR	2
GO:1902510	regulation of apoptotic DNA fragmentation	0.0289855	10/18800	0.000586165	0.00231988	0.000927014	BAX/IL6	2
GO:0001754	eye photoreceptor cell differentiation	0.0434783	45/18800	0.000601239	0.00236526	0.000945146	STAT3/NTRK2/VEGFA	3
GO:0010677	negative regulation of cellular carbohydrate metabolic process	0.0434783	45/18800	0.000601239	0.00236526	0.000945146	STAT3/GSK3B/PPARA	3
GO:0016572	histone phosphorylation	0.0434783	45/18800	0.000601239	0.00236526	0.000945146	MAPK3/CDK2/PRKCD	3
GO:0046006	regulation of activated T cell proliferation	0.0434783	45/18800	0.000601239	0.00236526	0.000945146	STAT5B/CASP3/HMGB1	3
GO:1904646	cellular response to amyloid-beta	0.0434783	45/18800	0.000601239	0.00236526	0.000945146	NGFR/ICAM1/GSK3B	3
GO:0042176	regulation of protein catabolic process	0.101449	395/18800	0.000603199	0.00237012	0.00094709	TIMP1/CDK2/EGFR/HMGCR/GSK3B/IL10/NEDD4L	7
GO:0006090	pyruvate metabolic process	0.057971	106/18800	0.000622842	0.00243562	0.000973263	STAT3/INSR/HIF1A/PPARA	4
GO:0042116	macrophage activation	0.057971	106/18800	0.000622842	0.00243562	0.000973263	LBP/PRKCE/IL6/IL10	4
GO:0051341	regulation of oxidoreductase activity	0.057971	106/18800	0.000622842	0.00243562	0.000973263	NFKB1/IL1A/EGFR/HIF1A	4
GO:1903707	negative regulation of hemopoiesis	0.057971	106/18800	0.000622842	0.00243562	0.000973263	BMP4/ERBB2/CTNNB1/HMGB1	4
GO:0002819	regulation of adaptive immune response	0.0724638	188/18800	0.000634779	0.00247935	0.000990735	TGFB1/AHR/HMGB1/IL6/IL10	5
GO:0031018	endocrine pancreas development	0.0434783	46/18800	0.000641502	0.00249076	0.000995296	BMP4/GSK3B/IL6	3
GO:0035794	positive regulation of mitochondrial membrane permeability	0.0434783	46/18800	0.000641502	0.00249076	0.000995296	BAX/GSK3B/BBC3	3
GO:0045581	negative regulation of T cell differentiation	0.0434783	46/18800	0.000641502	0.00249076	0.000995296	BMP4/ERBB2/HMGB1	3
GO:0070741	response to interleukin-6	0.0434783	46/18800	0.000641502	0.00249076	0.000995296	NFKB1/STAT3/IL6	3
GO:1900744	regulation of p38MAPK cascade	0.0434783	46/18800	0.000641502	0.00249076	0.000995296	HGF/BMP4/VEGFA	3
GO:0042886	amide transport	0.0869565	287/18800	0.000643141	0.00249417	0.000996658	ABCG2/PRKCE/PPARD/UCP2/IL6/HIF1A	6
GO:0007369	gastrulation	0.0724638	190/18800	0.000665885	0.00257932	0.00103068	BMP4/CTNNB1/MMP9/IL10/SMAD1	5
GO:0005976	polysaccharide metabolic process	0.057971	108/18800	0.000668232	0.00258535	0.0010331	TGFB1/NFKB1/INSR/GSK3B	4
GO:0009914	hormone transport	0.0869565	290/18800	0.000679067	0.00262418	0.00104861	PRKCE/PPARD/UCP2/SPP1/IL6/HIF1A	6
GO:0043618	regulation of transcription from RNA polymerase II promoter in response to stress	0.0434783	47/18800	0.000683447	0.00263179	0.00105165	HMOX1/HIF1A/VEGFA	3
GO:0045646	regulation of erythrocyte differentiation	0.0434783	47/18800	0.000683447	0.00263179	0.00105165	STAT3/STAT5B/HIF1A	3
GO:0051972	regulation of telomerase activity	0.0434783	47/18800	0.000683447	0.00263179	0.00105165	MAPK1/MAPK3/CTNNB1	3
GO:0090263	positive regulation of canonical Wnt signaling pathway	0.057971	109/18800	0.000691784	0.00266077	0.00106323	TBL1X/TGFB1/NFKB1/EGFR	4
GO:0002551	mast cell chemotaxis	0.0289855	11/18800	0.000714725	0.00272344	0.00108827	PGF/VEGFA	2
GO:0010887	negative regulation of cholesterol storage	0.0289855	11/18800	0.000714725	0.00272344	0.00108827	PPARD/PPARA	2
GO:0042487	regulation of odontogenesis of dentin-containing tooth	0.0289855	11/18800	0.000714725	0.00272344	0.00108827	NGFR/BMP4	2
GO:0043619	regulation of transcription from RNA polymerase II promoter in response to oxidative stress	0.0289855	11/18800	0.000714725	0.00272344	0.00108827	HMOX1/HIF1A	2
GO:0060272	embryonic skeletal joint morphogenesis	0.0289855	11/18800	0.000714725	0.00272344	0.00108827	BMP4/CTNNB1	2
GO:0070243	regulation of thymocyte apoptotic process	0.0289855	11/18800	0.000714725	0.00272344	0.00108827	BMP4/HIF1A	2
GO:0072110	glomerular mesangial cell proliferation	0.0289855	11/18800	0.000714725	0.00272344	0.00108827	BMP4/CFLAR	2
GO:1901030	positive regulation of mitochondrial outer membrane permeabilization involved in apoptotic signaling pathway	0.0289855	11/18800	0.000714725	0.00272344	0.00108827	GSK3B/BBC3	2
GO:0002062	chondrocyte differentiation	0.057971	110/18800	0.000715919	0.00272482	0.00108882	TGFB1/BMP4/RB1/CTNNB1	4
GO:0006953	acute-phase response	0.0434783	48/18800	0.000727101	0.0027419	0.00109565	LBP/IL1A/IL6	3
GO:0030195	negative regulation of blood coagulation	0.0434783	48/18800	0.000727101	0.0027419	0.00109565	PLAT/SERPINE1/PRKCD	3
GO:0035850	epithelial cell differentiation involved in kidney development	0.0434783	48/18800	0.000727101	0.0027419	0.00109565	BMP4/CTNNB1/MMP9	3
GO:0050798	activated T cell proliferation	0.0434783	48/18800	0.000727101	0.0027419	0.00109565	STAT5B/CASP3/HMGB1	3
GO:0061028	establishment of endothelial barrier	0.0434783	48/18800	0.000727101	0.0027419	0.00109565	VCL/ICAM1/VEGFA	3
GO:1902108	regulation of mitochondrial membrane permeability involved in apoptotic process	0.0434783	48/18800	0.000727101	0.0027419	0.00109565	BAX/GSK3B/BBC3	3
GO:1903426	regulation of reactive oxygen species biosynthetic process	0.0434783	48/18800	0.000727101	0.0027419	0.00109565	UCP1/CFLAR/PPARA	3
GO:1903587	regulation of blood vessel endothelial cell proliferation involved in sprouting angiogenesis	0.0434783	48/18800	0.000727101	0.0027419	0.00109565	NGFR/HMOX1/VEGFA	3
GO:0071897	DNA biosynthetic process	0.0724638	194/18800	0.00073151	0.00275536	0.00110103	MAPK1/HGF/MAPK3/CTNNB1/CDKN1A	5
GO:0007088	regulation of mitotic nuclear division	0.057971	111/18800	0.000740644	0.00277699	0.00110967	BMP4/IL1A/RB1/INSR	4
GO:0048640	negative regulation of developmental growth	0.057971	111/18800	0.000740644	0.00277699	0.00110967	BMP4/SPP1/CDKN1A/PPARA	4
GO:0071347	cellular response to interleukin-1	0.057971	111/18800	0.000740644	0.00277699	0.00110967	NFKB1/MAPK3/IL6/HIF1A	4
GO:0072009	nephron epithelium development	0.057971	111/18800	0.000740644	0.00277699	0.00110967	BMP4/CTNNB1/BCL2/VEGFA	4
GO:0021700	developmental maturation	0.0869565	296/18800	0.000755582	0.00282976	0.00113076	RB1/CTNNB1/BCL2/HIF1A/VEGFA/YWHAZ	6
GO:0002456	T cell mediated immunity	0.057971	112/18800	0.000765968	0.00285886	0.00114239	AHR/ICAM1/HMGB1/IL6	4
GO:0002698	negative regulation of immune effector process	0.057971	112/18800	0.000765968	0.00285886	0.00114239	HMOX1/TGFB1/AHR/IL10	4
GO:0009185	ribonucleoside diphosphate metabolic process	0.057971	112/18800	0.000765968	0.00285886	0.00114239	STAT3/INSR/HIF1A/PPARA	4
GO:0043330	response to exogenous dsRNA	0.0434783	49/18800	0.000772494	0.00287014	0.00114689	MAPK1/NFKBIA/MAPK3	3
GO:0045058	T cell selection	0.0434783	49/18800	0.000772494	0.00287014	0.00114689	STAT3/BCL2/IL6	3
GO:1900047	negative regulation of hemostasis	0.0434783	49/18800	0.000772494	0.00287014	0.00114689	PLAT/SERPINE1/PRKCD	3
GO:1904894	positive regulation of receptor signaling pathway via STAT	0.0434783	49/18800	0.000772494	0.00287014	0.00114689	TGFB1/IL6/IL10	3
GO:0007281	germ cell development	0.0869565	299/18800	0.00079626	0.00295509	0.00118084	ERCC1/BMP4/BAX/BCL2L1/CTNNB1/BCL2	6
GO:0032388	positive regulation of intracellular transport	0.0724638	198/18800	0.000801863	0.00297252	0.0011878	TGFB1/ERBB2/GSK3B/PRKCD/BBC3	5
GO:0031647	regulation of protein stability	0.0869565	300/18800	0.00081019	0.00299661	0.00119743	MAPK1/TBL1X/CASP3/BCL2/PRKCD/NEDD4L	6
GO:0051047	positive regulation of secretion	0.0869565	300/18800	0.00081019	0.00299661	0.00119743	TGFB1/IL1A/PRKCE/PPARD/SPP1/HIF1A	6
GO:0042303	molting cycle	0.057971	114/18800	0.000818443	0.00301459	0.00120462	NGFR/EGFR/CTNNB1/BCL2	4
GO:0042633	hair cycle	0.057971	114/18800	0.000818443	0.00301459	0.00120462	NGFR/EGFR/CTNNB1/BCL2	4
GO:0043200	response to amino acid	0.057971	114/18800	0.000818443	0.00301459	0.00120462	EGFR/NTRK2/BCL2L1/CASP3	4
GO:0034332	adherens junction organization	0.0434783	50/18800	0.000819652	0.00301459	0.00120462	VCL/CTNNB1/VEGFA	3
GO:0070231	T cell apoptotic process	0.0434783	50/18800	0.000819652	0.00301459	0.00120462	BMP4/BAX/HIF1A	3
GO:0010948	negative regulation of cell cycle process	0.0869565	301/18800	0.000824307	0.00302831	0.0012101	CDC6/BMP4/CDK2/RB1/BCL2/CDKN1A	6
GO:0007179	transforming growth factor beta receptor signaling pathway	0.0724638	200/18800	0.000838878	0.00307839	0.00123011	TGFB1/STAT3/FOS/PPARA/SMAD1	5
GO:0016032	viral process	0.101449	418/18800	0.000841364	0.00308406	0.00123238	ICAM1/EGFR/BCL2L1/INSR/GSK3B/BCL2/PPARA	7
GO:0002424	T cell mediated immune response to tumor cell	0.0289855	12/18800	0.000855637	0.00309826	0.00123805	AHR/HMGB1	2
GO:0003337	mesenchymal to epithelial transition involved in metanephros morphogenesis	0.0289855	12/18800	0.000855637	0.00309826	0.00123805	BMP4/CTNNB1	2
GO:0014842	regulation of skeletal muscle satellite cell proliferation	0.0289855	12/18800	0.000855637	0.00309826	0.00123805	PPARD/CFLAR	2
GO:0032966	negative regulation of collagen biosynthetic process	0.0289855	12/18800	0.000855637	0.00309826	0.00123805	PPARD/IL6	2
GO:0034333	adherens junction assembly	0.0289855	12/18800	0.000855637	0.00309826	0.00123805	VCL/CTNNB1	2
GO:0061517	macrophage proliferation	0.0289855	12/18800	0.000855637	0.00309826	0.00123805	MAPK1/MAPK3	2
GO:0070417	cellular response to cold	0.0289855	12/18800	0.000855637	0.00309826	0.00123805	NFKBIA/UCP1	2
GO:0072497	mesenchymal stem cell differentiation	0.0289855	12/18800	0.000855637	0.00309826	0.00123805	GSK3B/CTNNB1	2
GO:0099550	trans-synaptic signaling, modulating synaptic transmission	0.0289855	12/18800	0.000855637	0.00309826	0.00123805	PLAT/NTRK2	2
GO:1903624	regulation of DNA catabolic process	0.0289855	12/18800	0.000855637	0.00309826	0.00123805	BAX/IL6	2
GO:2000727	positive regulation of cardiac muscle cell differentiation	0.0289855	12/18800	0.000855637	0.00309826	0.00123805	TGFB1/BMP4	2
GO:0006006	glucose metabolic process	0.0724638	201/18800	0.000857856	0.00310286	0.00123989	INSR/PPARD/GSK3B/CRTC2/PPARA	5
GO:0002639	positive regulation of immunoglobulin production	0.0434783	51/18800	0.000868601	0.00312792	0.0012499	TGFB1/IL6/IL10	3
GO:0071622	regulation of granulocyte chemotaxis	0.0434783	51/18800	0.000868601	0.00312792	0.0012499	MAPK1/LBP/MAPK3	3
GO:1905710	positive regulation of membrane permeability	0.0434783	51/18800	0.000868601	0.00312792	0.0012499	BAX/GSK3B/BBC3	3
GO:2000179	positive regulation of neural precursor cell proliferation	0.0434783	51/18800	0.000868601	0.00312792	0.0012499	CTNNB1/HIF1A/VEGFA	3
GO:0071675	regulation of mononuclear cell migration	0.057971	116/18800	0.000873408	0.00314178	0.00125544	MAPK1/SERPINE1/MAPK3/HMGB1	4
GO:0002761	regulation of myeloid leukocyte differentiation	0.057971	117/18800	0.000901845	0.00324051	0.00129489	TGFB1/RB1/FOS/CTNNB1	4
GO:0002204	somatic recombination of immunoglobulin genes involved in immune response	0.0434783	52/18800	0.000919369	0.00328547	0.00131286	ERCC1/TGFB1/IL10	3
GO:0002208	somatic diversification of immunoglobulins involved in immune response	0.0434783	52/18800	0.000919369	0.00328547	0.00131286	ERCC1/TGFB1/IL10	3
GO:0045190	isotype switching	0.0434783	52/18800	0.000919369	0.00328547	0.00131286	ERCC1/TGFB1/IL10	3
GO:0050819	negative regulation of coagulation	0.0434783	52/18800	0.000919369	0.00328547	0.00131286	PLAT/SERPINE1/PRKCD	3
GO:2000677	regulation of transcription regulatory region DNA binding	0.0434783	52/18800	0.000919369	0.00328547	0.00131286	TGFB1/RB1/CTNNB1	3
GO:0042391	regulation of membrane potential	0.101449	425/18800	0.000926975	0.00330904	0.00132228	NTRK2/BAX/BCL2L1/UCP2/GSK3B/BCL2/NEDD4L	7
GO:0051897	positive regulation of protein kinase B signaling	0.057971	119/18800	0.000960666	0.00342558	0.00136884	TGFB1/EGFR/INSR/MET	4
GO:0032210	regulation of telomere maintenance via telomerase	0.0434783	53/18800	0.000971982	0.00345091	0.00137897	MAPK1/MAPK3/CTNNB1	3
GO:0043620	regulation of DNA-templated transcription in response to stress	0.0434783	53/18800	0.000971982	0.00345091	0.00137897	HMOX1/HIF1A/VEGFA	3
GO:0048260	positive regulation of receptor-mediated endocytosis	0.0434783	53/18800	0.000971982	0.00345091	0.00137897	SERPINE1/INSR/VEGFA	3
GO:0071385	cellular response to glucocorticoid stimulus	0.0434783	53/18800	0.000971982	0.00345091	0.00137897	PLAT/CFLAR/CASP9	3
GO:0010975	regulation of neuron projection development	0.101449	431/18800	0.00100571	0.00353259	0.00141161	HGF/NTRK2/CFLAR/GSK3B/SPP1/VEGFA/NEDD4L	7
GO:0007183	SMAD protein complex assembly	0.0289855	13/18800	0.00100881	0.00353259	0.00141161	TGFB1/SMAD1	2
GO:0010713	negative regulation of collagen metabolic process	0.0289855	13/18800	0.00100881	0.00353259	0.00141161	PPARD/IL6	2
GO:0010745	negative regulation of macrophage derived foam cell differentiation	0.0289855	13/18800	0.00100881	0.00353259	0.00141161	NFKBIA/PPARA	2
GO:0014857	regulation of skeletal muscle cell proliferation	0.0289855	13/18800	0.00100881	0.00353259	0.00141161	PPARD/CFLAR	2
GO:0045820	negative regulation of glycolytic process	0.0289855	13/18800	0.00100881	0.00353259	0.00141161	STAT3/PPARA	2
GO:0048012	hepatocyte growth factor receptor signaling pathway	0.0289855	13/18800	0.00100881	0.00353259	0.00141161	HGF/MET	2
GO:0061418	regulation of transcription from RNA polymerase II promoter in response to hypoxia	0.0289855	13/18800	0.00100881	0.00353259	0.00141161	HIF1A/VEGFA	2
GO:0072540	T-helper 17 cell lineage commitment	0.0289855	13/18800	0.00100881	0.00353259	0.00141161	STAT3/IL6	2
GO:0098792	xenophagy	0.0289855	13/18800	0.00100881	0.00353259	0.00141161	MAPK3/TBK1	2
GO:1901298	regulation of hydrogen peroxide-mediated programmed cell death	0.0289855	13/18800	0.00100881	0.00353259	0.00141161	HGF/MET	2
GO:1901862	negative regulation of muscle tissue development	0.0289855	13/18800	0.00100881	0.00353259	0.00141161	TGFB1/BMP4	2
GO:0060070	canonical Wnt signaling pathway	0.0869565	313/18800	0.001009	0.00353259	0.00141161	TBL1X/TGFB1/NFKB1/EGFR/GSK3B/CTNNB1	6
GO:0030282	bone mineralization	0.057971	121/18800	0.00102214	0.00356715	0.00142542	TGFB1/BMP4/MMP13/HIF1A	4
GO:0038127	ERBB signaling pathway	0.057971	121/18800	0.00102214	0.00356715	0.00142542	MAPK1/TGFB1/EGFR/MMP9	4
GO:0055007	cardiac muscle cell differentiation	0.057971	121/18800	0.00102214	0.00356715	0.00142542	TGFB1/BMP4/VEGFA/PPARA	4
GO:0045661	regulation of myoblast differentiation	0.0434783	54/18800	0.00102647	0.00357463	0.00142841	TGFB1/BMP4/PPARD	3
GO:0051155	positive regulation of striated muscle cell differentiation	0.0434783	54/18800	0.00102647	0.00357463	0.00142841	TGFB1/BMP4/BCL2	3
GO:0046887	positive regulation of hormone secretion	0.057971	122/18800	0.00105389	0.00366624	0.00146501	PRKCE/PPARD/SPP1/HIF1A	4
GO:0002763	positive regulation of myeloid leukocyte differentiation	0.0434783	55/18800	0.00108285	0.00375501	0.00150049	TGFB1/RB1/FOS	3
GO:0003179	heart valve morphogenesis	0.0434783	55/18800	0.00108285	0.00375501	0.00150049	TGFB1/BMP4/RB1	3
GO:0045620	negative regulation of lymphocyte differentiation	0.0434783	55/18800	0.00108285	0.00375501	0.00150049	BMP4/ERBB2/HMGB1	3
GO:0001704	formation of primary germ layer	0.057971	123/18800	0.00108633	0.00375914	0.00150213	BMP4/CTNNB1/MMP9/SMAD1	4
GO:0002224	toll-like receptor signaling pathway	0.057971	123/18800	0.00108633	0.00375914	0.00150213	NFKBIA/LBP/PRKCE/HMGB1	4
GO:0042177	negative regulation of protein catabolic process	0.057971	124/18800	0.00111946	0.00386563	0.00154469	TIMP1/EGFR/HMGCR/IL10	4
GO:1904375	regulation of protein localization to cell periphery	0.057971	124/18800	0.00111946	0.00386563	0.00154469	TGFB1/EGFR/BCL2L1/PRKCE	4
GO:0010676	positive regulation of cellular carbohydrate metabolic process	0.0434783	56/18800	0.00114115	0.00393636	0.00157295	INSR/PRKCE/PPARA	3
GO:1901990	regulation of mitotic cell cycle phase transition	0.0869565	321/18800	0.00114881	0.00395862	0.00158185	CDC6/CDK2/RB1/EGFR/BCL2/CDKN1A	6
GO:0014841	skeletal muscle satellite cell proliferation	0.0289855	14/18800	0.00117416	0.00401222	0.00160326	PPARD/CFLAR	2
GO:0030213	hyaluronan biosynthetic process	0.0289855	14/18800	0.00117416	0.00401222	0.00160326	TGFB1/NFKB1	2
GO:0045579	positive regulation of B cell differentiation	0.0289855	14/18800	0.00117416	0.00401222	0.00160326	STAT5B/IL10	2
GO:0048070	regulation of developmental pigmentation	0.0289855	14/18800	0.00117416	0.00401222	0.00160326	BAX/BCL2	2
GO:0050930	induction of positive chemotaxis	0.0289855	14/18800	0.00117416	0.00401222	0.00160326	PGF/VEGFA	2
GO:0120305	regulation of pigmentation	0.0289855	14/18800	0.00117416	0.00401222	0.00160326	BAX/BCL2	2
GO:1901722	regulation of cell proliferation involved in kidney development	0.0289855	14/18800	0.00117416	0.00401222	0.00160326	BMP4/CFLAR	2
GO:1902947	regulation of tau-protein kinase activity	0.0289855	14/18800	0.00117416	0.00401222	0.00160326	HGF/RB1	2
GO:0008202	steroid metabolic process	0.0869565	323/18800	0.00118598	0.00404839	0.00161772	NFKB1/IL1A/HMGCR/STAT5B/PPARD/SPP1	6
GO:0038066	p38MAPK cascade	0.0434783	57/18800	0.0012014	0.00409249	0.00163534	HGF/BMP4/VEGFA	3
GO:0042306	regulation of protein import into nucleus	0.0434783	57/18800	0.0012014	0.00409249	0.00163534	TGFB1/BMP4/PRKCD	3
GO:0045931	positive regulation of mitotic cell cycle	0.057971	128/18800	0.00125911	0.00428218	0.00171114	CDC6/RB1/EGFR/STAT5B	4
GO:0033619	membrane protein proteolysis	0.0434783	58/18800	0.00126362	0.00428218	0.00171114	TIMP1/TGFB1/IL10	3
GO:0042733	embryonic digit morphogenesis	0.0434783	58/18800	0.00126362	0.00428218	0.00171114	BMP4/BAX/CTNNB1	3
GO:0048010	vascular endothelial growth factor receptor signaling pathway	0.0434783	58/18800	0.00126362	0.00428218	0.00171114	HIF1A/PGF/VEGFA	3
GO:0061005	cell differentiation involved in kidney development	0.0434783	58/18800	0.00126362	0.00428218	0.00171114	BMP4/CTNNB1/MMP9	3
GO:0030072	peptide hormone secretion	0.0724638	220/18800	0.00128291	0.00434307	0.00173547	PRKCE/PPARD/UCP2/IL6/HIF1A	5
GO:0032612	interleukin-1 production	0.057971	129/18800	0.00129584	0.00437781	0.00174935	STAT3/HMGB1/IL6/IL10	4
GO:0032652	regulation of interleukin-1 production	0.057971	129/18800	0.00129584	0.00437781	0.00174935	STAT3/HMGB1/IL6/IL10	4
GO:0007596	blood coagulation	0.0724638	221/18800	0.00130892	0.00441742	0.00176518	VCL/PLAT/SERPINE1/IL6/PRKCD	5
GO:0031102	neuron projection regeneration	0.0434783	59/18800	0.00132783	0.00446745	0.00178517	HGF/SPP1/BCL2	3
GO:0051785	positive regulation of nuclear division	0.0434783	59/18800	0.00132783	0.00446745	0.00178517	IL1A/RB1/INSR	3
GO:0071384	cellular response to corticosteroid stimulus	0.0434783	59/18800	0.00132783	0.00446745	0.00178517	PLAT/CFLAR/CASP9	3
GO:0009132	nucleoside diphosphate metabolic process	0.057971	130/18800	0.00133332	0.00448132	0.00179071	STAT3/INSR/HIF1A/PPARA	4
GO:0010421	hydrogen peroxide-mediated programmed cell death	0.0289855	15/18800	0.00135159	0.0044966	0.00179682	HGF/MET	2
GO:0010763	positive regulation of fibroblast migration	0.0289855	15/18800	0.00135159	0.0044966	0.00179682	TGFB1/PRKCE	2
GO:0014856	skeletal muscle cell proliferation	0.0289855	15/18800	0.00135159	0.0044966	0.00179682	PPARD/CFLAR	2
GO:0042994	cytoplasmic sequestering of transcription factor	0.0289855	15/18800	0.00135159	0.0044966	0.00179682	NFKBIA/IL10	2
GO:0046321	positive regulation of fatty acid oxidation	0.0289855	15/18800	0.00135159	0.0044966	0.00179682	PPARD/PPARA	2
GO:0060572	morphogenesis of an epithelial bud	0.0289855	15/18800	0.00135159	0.0044966	0.00179682	BMP4/CTNNB1	2
GO:0072283	metanephric renal vesicle morphogenesis	0.0289855	15/18800	0.00135159	0.0044966	0.00179682	BMP4/CTNNB1	2
GO:0072498	embryonic skeletal joint development	0.0289855	15/18800	0.00135159	0.0044966	0.00179682	BMP4/CTNNB1	2
GO:2000650	negative regulation of sodium ion transmembrane transporter activity	0.0289855	15/18800	0.00135159	0.0044966	0.00179682	PRKCE/NEDD4L	2
GO:2001028	positive regulation of endothelial cell chemotaxis	0.0289855	15/18800	0.00135159	0.0044966	0.00179682	MET/VEGFA	2
GO:0016447	somatic recombination of immunoglobulin gene segments	0.0434783	60/18800	0.00139406	0.00461449	0.00184393	ERCC1/TGFB1/IL10	3
GO:0043407	negative regulation of MAP kinase activity	0.0434783	60/18800	0.00139406	0.00461449	0.00184393	BMP4/HMGCR/PRKCD	3
GO:0046824	positive regulation of nucleocytoplasmic transport	0.0434783	60/18800	0.00139406	0.00461449	0.00184393	TGFB1/GSK3B/PRKCD	3
GO:0051205	protein insertion into membrane	0.0434783	60/18800	0.00139406	0.00461449	0.00184393	EGFR/BAX/BBC3	3
GO:1903670	regulation of sprouting angiogenesis	0.0434783	60/18800	0.00139406	0.00461449	0.00184393	IL10/VEGFA/SMAD1	3
GO:0000723	telomere maintenance	0.057971	132/18800	0.00141053	0.00465959	0.00186195	ERCC1/MAPK1/MAPK3/CTNNB1	4
GO:0032874	positive regulation of stress-activated MAPK cascade	0.057971	132/18800	0.00141053	0.00465959	0.00186195	BMP4/IL1A/HMGB1/VEGFA	4
GO:0002790	peptide secretion	0.0724638	225/18800	0.00141686	0.00467578	0.00186842	PRKCE/PPARD/UCP2/IL6/HIF1A	5
GO:0050817	coagulation	0.0724638	226/18800	0.00144484	0.00476333	0.0019034	VCL/PLAT/SERPINE1/IL6/PRKCD	5
GO:0061041	regulation of wound healing	0.057971	133/18800	0.00145028	0.00477276	0.00190717	PLAT/SERPINE1/PRKCE/PRKCD	4
GO:0030111	regulation of Wnt signaling pathway	0.0869565	336/18800	0.00145061	0.00477276	0.00190717	TBL1X/TGFB1/NFKB1/EGFR/GSK3B/CTNNB1	6
GO:0007405	neuroblast proliferation	0.0434783	61/18800	0.00146234	0.00478252	0.00191107	CTNNB1/HIF1A/VEGFA	3
GO:0050994	regulation of lipid catabolic process	0.0434783	61/18800	0.00146234	0.00478252	0.00191107	PRKCE/PPARA/PRKCD	3
GO:1903409	reactive oxygen species biosynthetic process	0.0434783	61/18800	0.00146234	0.00478252	0.00191107	UCP1/CFLAR/PPARA	3
GO:1904356	regulation of telomere maintenance via telomere lengthening	0.0434783	61/18800	0.00146234	0.00478252	0.00191107	MAPK1/MAPK3/CTNNB1	3
GO:1904589	regulation of protein import	0.0434783	61/18800	0.00146234	0.00478252	0.00191107	TGFB1/BMP4/PRKCD	3
GO:2001244	positive regulation of intrinsic apoptotic signaling pathway	0.0434783	61/18800	0.00146234	0.00478252	0.00191107	BAX/MCL1/BBC3	3
GO:0007599	hemostasis	0.0724638	227/18800	0.00147323	0.00481334	0.00192339	VCL/PLAT/SERPINE1/IL6/PRKCD	5
GO:0070304	positive regulation of stress-activated protein kinase signaling cascade	0.057971	134/18800	0.00149081	0.00486594	0.0019444	BMP4/IL1A/HMGB1/VEGFA	4
GO:0043030	regulation of macrophage activation	0.0434783	62/18800	0.00153268	0.00497527	0.0019881	LBP/IL6/IL10	3
GO:0046530	photoreceptor cell differentiation	0.0434783	62/18800	0.00153268	0.00497527	0.0019881	STAT3/NTRK2/VEGFA	3
GO:0001780	neutrophil homeostasis	0.0289855	16/18800	0.00154101	0.00497527	0.0019881	HMGB1/IL6	2
GO:0010224	response to UV-B	0.0289855	16/18800	0.00154101	0.00497527	0.0019881	BCL2/CDKN1A	2
GO:0010715	regulation of extracellular matrix disassembly	0.0289855	16/18800	0.00154101	0.00497527	0.0019881	TGFB1/IL6	2
GO:0045651	positive regulation of macrophage differentiation	0.0289855	16/18800	0.00154101	0.00497527	0.0019881	TGFB1/RB1	2
GO:0072109	glomerular mesangium development	0.0289855	16/18800	0.00154101	0.00497527	0.0019881	BMP4/CFLAR	2
GO:0097468	programmed cell death in response to reactive oxygen species	0.0289855	16/18800	0.00154101	0.00497527	0.0019881	HGF/MET	2
GO:1901163	regulation of trophoblast cell migration	0.0289855	16/18800	0.00154101	0.00497527	0.0019881	TIMP1/VEGFA	2
GO:1902306	negative regulation of sodium ion transmembrane transport	0.0289855	16/18800	0.00154101	0.00497527	0.0019881	PRKCE/NEDD4L	2
GO:2000696	regulation of epithelial cell differentiation involved in kidney development	0.0289855	16/18800	0.00154101	0.00497527	0.0019881	CTNNB1/MMP9	2
GO:0032615	interleukin-12 production	0.0434783	63/18800	0.00160511	0.00516187	0.00206266	NFKB1/HMGB1/IL10	3
GO:0032655	regulation of interleukin-12 production	0.0434783	63/18800	0.00160511	0.00516187	0.00206266	NFKB1/HMGB1/IL10	3
GO:0045453	bone resorption	0.0434783	63/18800	0.00160511	0.00516187	0.00206266	CTNNB1/SPP1/IL6	3
GO:0070542	response to fatty acid	0.0434783	63/18800	0.00160511	0.00516187	0.00206266	PLAT/UCP1/UCP2	3
GO:0042552	myelination	0.057971	138/18800	0.00166085	0.00533589	0.0021322	HGF/ERBB2/NTRK2/CTNNB1	4
GO:0031638	zymogen activation	0.0434783	64/18800	0.00167965	0.00538573	0.00215211	PLAT/SERPINE1/CASP9	3
GO:0040014	regulation of multicellular organism growth	0.0434783	64/18800	0.00167965	0.00538573	0.00215211	STAT3/STAT5B/BCL2	3
GO:0048738	cardiac muscle tissue development	0.0724638	234/18800	0.00168363	0.0053932	0.0021551	TGFB1/BMP4/VEGFA/PPARA/SMAD1	5
GO:0051783	regulation of nuclear division	0.057971	139/18800	0.00170538	0.00545755	0.00218081	BMP4/IL1A/RB1/INSR	4
GO:0001710	mesodermal cell fate commitment	0.0289855	17/18800	0.00174235	0.00550595	0.00220015	BMP4/SMAD1	2
GO:0002295	T-helper cell lineage commitment	0.0289855	17/18800	0.00174235	0.00550595	0.00220015	STAT3/IL6	2
GO:0016202	regulation of striated muscle tissue development	0.0289855	17/18800	0.00174235	0.00550595	0.00220015	TGFB1/BMP4	2
GO:0035729	cellular response to hepatocyte growth factor stimulus	0.0289855	17/18800	0.00174235	0.00550595	0.00220015	HGF/IL10	2
GO:0042481	regulation of odontogenesis	0.0289855	17/18800	0.00174235	0.00550595	0.00220015	NGFR/BMP4	2
GO:0043117	positive regulation of vascular permeability	0.0289855	17/18800	0.00174235	0.00550595	0.00220015	TGFB1/VEGFA	2
GO:0061450	trophoblast cell migration	0.0289855	17/18800	0.00174235	0.00550595	0.00220015	TIMP1/VEGFA	2
GO:0070230	positive regulation of lymphocyte apoptotic process	0.0289855	17/18800	0.00174235	0.00550595	0.00220015	BAX/IL10	2
GO:1901550	regulation of endothelial cell development	0.0289855	17/18800	0.00174235	0.00550595	0.00220015	VCL/VEGFA	2
GO:1903140	regulation of establishment of endothelial barrier	0.0289855	17/18800	0.00174235	0.00550595	0.00220015	VCL/VEGFA	2
GO:1903358	regulation of Golgi organization	0.0289855	17/18800	0.00174235	0.00550595	0.00220015	MAPK1/MAPK3	2
GO:1904355	positive regulation of telomere capping	0.0289855	17/18800	0.00174235	0.00550595	0.00220015	MAPK1/MAPK3	2
GO:2001267	regulation of cysteine-type endopeptidase activity involved in apoptotic signaling pathway	0.0289855	17/18800	0.00174235	0.00550595	0.00220015	BAX/MMP9	2
GO:0045089	positive regulation of innate immune response	0.057971	140/18800	0.00175073	0.0055235	0.00220716	LBP/STAT5B/HMGB1/TBK1	4
GO:0003170	heart valve development	0.0434783	65/18800	0.00175633	0.0055235	0.00220716	TGFB1/BMP4/RB1	3
GO:0007588	excretion	0.0434783	65/18800	0.00175633	0.0055235	0.00220716	HMOX1/ABCG2/NEDD4L	3
GO:0030858	positive regulation of epithelial cell differentiation	0.0434783	65/18800	0.00175633	0.0055235	0.00220716	SERPINE1/BMP4/CTNNB1	3
GO:0072577	endothelial cell apoptotic process	0.0434783	65/18800	0.00175633	0.0055235	0.00220716	SERPINE1/ICAM1/IL10	3
GO:0070555	response to interleukin-1	0.057971	141/18800	0.00179692	0.00564573	0.00225601	NFKB1/MAPK3/IL6/HIF1A	4
GO:0002831	regulation of response to biotic stimulus	0.0869565	351/18800	0.00180962	0.00568019	0.00226978	LBP/AHR/MAPK3/STAT5B/HMGB1/TBK1	6
GO:0030193	regulation of blood coagulation	0.0434783	66/18800	0.00183516	0.00574385	0.00229522	PLAT/SERPINE1/PRKCD	3
GO:0032835	glomerulus development	0.0434783	66/18800	0.00183516	0.00574385	0.00229522	BMP4/CFLAR/BCL2	3
GO:0034605	cellular response to heat	0.0434783	66/18800	0.00183516	0.00574385	0.00229522	HMOX1/IL1A/GSK3B	3
GO:0035264	multicellular organism growth	0.057971	143/18800	0.00189181	0.00591552	0.00236381	ERCC1/STAT3/STAT5B/BCL2	4
GO:0032024	positive regulation of insulin secretion	0.0434783	67/18800	0.00191617	0.00598596	0.00239196	PRKCE/PPARD/HIF1A	3
GO:0030177	positive regulation of Wnt signaling pathway	0.057971	144/18800	0.00194054	0.00602839	0.00240892	TBL1X/TGFB1/NFKB1/EGFR	4
GO:0010639	negative regulation of organelle organization	0.0869565	356/18800	0.00194315	0.00602839	0.00240892	ERCC1/HGF/BMP4/BCL2L1/MET/PRKCD	6
GO:0019318	hexose metabolic process	0.0724638	242/18800	0.00195025	0.00602839	0.00240892	INSR/PPARD/GSK3B/CRTC2/PPARA	5
GO:0002281	macrophage activation involved in immune response	0.0289855	18/18800	0.0019555	0.00602839	0.00240892	LBP/PRKCE	2
GO:0003159	morphogenesis of an endothelium	0.0289855	18/18800	0.0019555	0.00602839	0.00240892	BMP4/CTNNB1	2
GO:0006309	apoptotic DNA fragmentation	0.0289855	18/18800	0.0019555	0.00602839	0.00240892	BAX/IL6	2
GO:0010759	positive regulation of macrophage chemotaxis	0.0289855	18/18800	0.0019555	0.00602839	0.00240892	MAPK1/MAPK3	2
GO:0030889	negative regulation of B cell proliferation	0.0289855	18/18800	0.0019555	0.00602839	0.00240892	CASP3/IL10	2
GO:0060263	regulation of respiratory burst	0.0289855	18/18800	0.0019555	0.00602839	0.00240892	LBP/INSR	2
GO:0060391	positive regulation of SMAD protein signal transduction	0.0289855	18/18800	0.0019555	0.00602839	0.00240892	TGFB1/BMP4	2
GO:0061154	endothelial tube morphogenesis	0.0289855	18/18800	0.0019555	0.00602839	0.00240892	BMP4/CTNNB1	2
GO:0072077	renal vesicle morphogenesis	0.0289855	18/18800	0.0019555	0.00602839	0.00240892	BMP4/CTNNB1	2
GO:2000136	regulation of cell proliferation involved in heart morphogenesis	0.0289855	18/18800	0.0019555	0.00602839	0.00240892	BMP4/CTNNB1	2
GO:2000641	regulation of early endosome to late endosome transport	0.0289855	18/18800	0.0019555	0.00602839	0.00240892	MAPK1/MAPK3	2
GO:0061180	mammary gland epithelium development	0.0434783	68/18800	0.00199937	0.00615206	0.00245833	MAPK1/BAX/HIF1A	3
GO:1900046	regulation of hemostasis	0.0434783	68/18800	0.00199937	0.00615206	0.00245833	PLAT/SERPINE1/PRKCD	3
GO:0106106	cold-induced thermogenesis	0.057971	146/18800	0.00204059	0.00626711	0.00250431	UCP1/RB1/UCP2/VEGFA	4
GO:0120161	regulation of cold-induced thermogenesis	0.057971	146/18800	0.00204059	0.00626711	0.00250431	UCP1/RB1/UCP2/VEGFA	4
GO:0007004	telomere maintenance via telomerase	0.0434783	69/18800	0.0020848	0.00637302	0.00254663	MAPK1/MAPK3/CTNNB1	3
GO:0016445	somatic diversification of immunoglobulins	0.0434783	69/18800	0.0020848	0.00637302	0.00254663	ERCC1/TGFB1/IL10	3
GO:0032370	positive regulation of lipid transport	0.0434783	69/18800	0.0020848	0.00637302	0.00254663	IL1A/SPP1/PRKCD	3
GO:0034394	protein localization to cell surface	0.0434783	69/18800	0.0020848	0.00637302	0.00254663	VCL/CTNNB1/NEDD4L	3
GO:0070527	platelet aggregation	0.0434783	69/18800	0.0020848	0.00637302	0.00254663	VCL/IL6/PRKCD	3
GO:0071695	anatomical structure maturation	0.0724638	246/18800	0.00209459	0.00639701	0.00255621	RB1/CTNNB1/BCL2/HIF1A/VEGFA	5
GO:0009636	response to toxic substance	0.0724638	247/18800	0.00213187	0.00650478	0.00259928	ABCG2/AHR/BAX/FOS/BCL2	5
GO:0014706	striated muscle tissue development	0.0724638	248/18800	0.00216963	0.00655517	0.00261941	TGFB1/BMP4/VEGFA/PPARA/SMAD1	5
GO:0042742	defense response to bacterium	0.0869565	364/18800	0.0021722	0.00655517	0.00261941	LBP/SERPINE1/IL6/IL10/PRKCD/TBK1	6
GO:0002548	monocyte chemotaxis	0.0434783	70/18800	0.00217246	0.00655517	0.00261941	SERPINE1/HMGB1/IL6	3
GO:0061035	regulation of cartilage development	0.0434783	70/18800	0.00217246	0.00655517	0.00261941	BMP4/CTNNB1/SMAD1	3
GO:0010885	regulation of cholesterol storage	0.0289855	19/18800	0.00218039	0.00655517	0.00261941	PPARD/PPARA	2
GO:0032695	negative regulation of interleukin-12 production	0.0289855	19/18800	0.00218039	0.00655517	0.00261941	NFKB1/IL10	2
GO:0032930	positive regulation of superoxide anion generation	0.0289855	19/18800	0.00218039	0.00655517	0.00261941	TGFB1/PRKCD	2
GO:0035728	response to hepatocyte growth factor	0.0289855	19/18800	0.00218039	0.00655517	0.00261941	HGF/IL10	2
GO:0045603	positive regulation of endothelial cell differentiation	0.0289855	19/18800	0.00218039	0.00655517	0.00261941	BMP4/CTNNB1	2
GO:0048643	positive regulation of skeletal muscle tissue development	0.0289855	19/18800	0.00218039	0.00655517	0.00261941	CTNNB1/BCL2	2
GO:0051546	keratinocyte migration	0.0289855	19/18800	0.00218039	0.00655517	0.00261941	PPARD/MMP9	2
GO:0060749	mammary gland alveolus development	0.0289855	19/18800	0.00218039	0.00655517	0.00261941	HIF1A/VEGFA	2
GO:0061323	cell proliferation involved in heart morphogenesis	0.0289855	19/18800	0.00218039	0.00655517	0.00261941	BMP4/CTNNB1	2
GO:0061377	mammary gland lobule development	0.0289855	19/18800	0.00218039	0.00655517	0.00261941	HIF1A/VEGFA	2
GO:0072087	renal vesicle development	0.0289855	19/18800	0.00218039	0.00655517	0.00261941	BMP4/CTNNB1	2
GO:1903427	negative regulation of reactive oxygen species biosynthetic process	0.0289855	19/18800	0.00218039	0.00655517	0.00261941	CFLAR/PPARA	2
GO:0016570	histone modification	0.101449	494/18800	0.00219321	0.00658767	0.0026324	TBL1X/MAPK3/CDK2/CTNNB1/CRTC2/VEGFA/PRKCD	7
GO:0015833	peptide transport	0.0724638	249/18800	0.00220787	0.00661957	0.00264515	PRKCE/PPARD/UCP2/IL6/HIF1A	5
GO:0034612	response to tumor necrosis factor	0.0724638	249/18800	0.00220787	0.00661957	0.00264515	MAPK1/NFKBIA/NFKB1/MAPK3/CASP3	5
GO:0009150	purine ribonucleotide metabolic process	0.0869565	366/18800	0.00223253	0.0066874	0.00267225	TGFB1/STAT3/HMGCR/INSR/HIF1A/PPARA	6
GO:0050818	regulation of coagulation	0.0434783	71/18800	0.00226239	0.00676446	0.00270305	PLAT/SERPINE1/PRKCD	3
GO:2000379	positive regulation of reactive oxygen species metabolic process	0.0434783	71/18800	0.00226239	0.00676446	0.00270305	TGFB1/CDKN1A/PRKCD	3
GO:0010951	negative regulation of endopeptidase activity	0.0724638	251/18800	0.00228583	0.00682832	0.00272856	TIMP1/HGF/SERPINE1/MMP9/VEGFA	5
GO:0045580	regulation of T cell differentiation	0.057971	151/18800	0.00230624	0.00688301	0.00275042	BMP4/ERBB2/STAT5B/HMGB1	4
GO:0014855	striated muscle cell proliferation	0.0434783	72/18800	0.0023546	0.00701455	0.00280298	PPARD/CFLAR/SMAD1	3
GO:0042246	tissue regeneration	0.0434783	72/18800	0.0023546	0.00701455	0.00280298	PPARD/CFLAR/CDKN1A	3
GO:0016052	carbohydrate catabolic process	0.057971	152/18800	0.00236209	0.00703049	0.00280935	STAT3/INSR/HIF1A/PPARA	4
GO:0051346	negative regulation of hydrolase activity	0.0869565	371/18800	0.0023889	0.00710385	0.00283866	TIMP1/HGF/SERPINE1/GSK3B/MMP9/VEGFA	6
GO:0002837	regulation of immune response to tumor cell	0.0289855	20/18800	0.00241692	0.00710975	0.00284102	AHR/HMGB1	2
GO:0032793	positive regulation of CREB transcription factor activity	0.0289855	20/18800	0.00241692	0.00710975	0.00284102	CRTC2/VEGFA	2
GO:0035902	response to immobilization stress	0.0289855	20/18800	0.00241692	0.00710975	0.00284102	ERCC1/FOS	2
GO:0043373	CD4-positive, alpha-beta T cell lineage commitment	0.0289855	20/18800	0.00241692	0.00710975	0.00284102	STAT3/IL6	2
GO:0045821	positive regulation of glycolytic process	0.0289855	20/18800	0.00241692	0.00710975	0.00284102	INSR/HIF1A	2
GO:0052695	cellular glucuronidation	0.0289855	20/18800	0.00241692	0.00710975	0.00284102	UGT1A6/PRKCE	2
GO:0060231	mesenchymal to epithelial transition	0.0289855	20/18800	0.00241692	0.00710975	0.00284102	BMP4/CTNNB1	2
GO:0070233	negative regulation of T cell apoptotic process	0.0289855	20/18800	0.00241692	0.00710975	0.00284102	BMP4/HIF1A	2
GO:0070584	mitochondrion morphogenesis	0.0289855	20/18800	0.00241692	0.00710975	0.00284102	BAX/BCL2L1	2
GO:0090026	positive regulation of monocyte chemotaxis	0.0289855	20/18800	0.00241692	0.00710975	0.00284102	SERPINE1/HMGB1	2
GO:0090201	negative regulation of release of cytochrome c from mitochondria	0.0289855	20/18800	0.00241692	0.00710975	0.00284102	HGF/BCL2L1	2
GO:1903209	positive regulation of oxidative stress-induced cell death	0.0289855	20/18800	0.00241692	0.00710975	0.00284102	MMP3/MCL1	2
GO:1901988	negative regulation of cell cycle phase transition	0.0724638	255/18800	0.00244776	0.00717221	0.00286598	CDC6/CDK2/RB1/BCL2/CDKN1A	5
GO:0002381	immunoglobulin production involved in immunoglobulin-mediated immune response	0.0434783	73/18800	0.0024491	0.00717221	0.00286598	ERCC1/TGFB1/IL10	3
GO:0032732	positive regulation of interleukin-1 production	0.0434783	73/18800	0.0024491	0.00717221	0.00286598	STAT3/HMGB1/IL6	3
GO:0051145	smooth muscle cell differentiation	0.0434783	73/18800	0.0024491	0.00717221	0.00286598	BMP4/CTNNB1/VEGFA	3
GO:0150076	neuroinflammatory response	0.0434783	73/18800	0.0024491	0.00717221	0.00286598	MMP3/MMP9/IL6	3
GO:0050770	regulation of axonogenesis	0.057971	154/18800	0.00247658	0.00723975	0.00289297	NTRK2/GSK3B/SPP1/VEGFA	4
GO:0097530	granulocyte migration	0.057971	154/18800	0.00247658	0.00723975	0.00289297	MAPK1/LBP/MAPK3/IL1A	4
GO:0034976	response to endoplasmic reticulum stress	0.0724638	257/18800	0.00253178	0.00739451	0.00295481	BAX/BCL2L1/GSK3B/BCL2/BBC3	5
GO:0043271	negative regulation of ion transport	0.057971	155/18800	0.00253524	0.00739802	0.00295621	PRKCE/MMP9/BCL2/NEDD4L	4
GO:0002637	regulation of immunoglobulin production	0.0434783	74/18800	0.00254593	0.0074226	0.00296604	TGFB1/IL6/IL10	3
GO:0006278	RNA-templated DNA biosynthetic process	0.0434783	75/18800	0.00264509	0.00767422	0.00306658	MAPK1/MAPK3/CTNNB1	3
GO:0045685	regulation of glial cell differentiation	0.0434783	75/18800	0.00264509	0.00767422	0.00306658	TGFB1/CTNNB1/IL6	3
GO:0071230	cellular response to amino acid stimulus	0.0434783	75/18800	0.00264509	0.00767422	0.00306658	EGFR/NTRK2/BCL2L1	3
GO:0002902	regulation of B cell apoptotic process	0.0289855	21/18800	0.00266502	0.00767422	0.00306658	BAX/IL10	2
GO:0007063	regulation of sister chromatid cohesion	0.0289855	21/18800	0.00266502	0.00767422	0.00306658	RB1/CTNNB1	2
GO:0010766	negative regulation of sodium ion transport	0.0289855	21/18800	0.00266502	0.00767422	0.00306658	PRKCE/NEDD4L	2
GO:0010878	cholesterol storage	0.0289855	21/18800	0.00266502	0.00767422	0.00306658	PPARD/PPARA	2
GO:0030220	platelet formation	0.0289855	21/18800	0.00266502	0.00767422	0.00306658	CASP3/CASP9	2
GO:0032069	regulation of nuclease activity	0.0289855	21/18800	0.00266502	0.00767422	0.00306658	HMGB1/PRKCD	2
GO:0045063	T-helper 1 cell differentiation	0.0289855	21/18800	0.00266502	0.00767422	0.00306658	RELB/HMGB1	2
GO:0072111	cell proliferation involved in kidney development	0.0289855	21/18800	0.00266502	0.00767422	0.00306658	BMP4/CFLAR	2
GO:0090189	regulation of branching involved in ureteric bud morphogenesis	0.0289855	21/18800	0.00266502	0.00767422	0.00306658	BMP4/VEGFA	2
GO:1900543	negative regulation of purine nucleotide metabolic process	0.0289855	21/18800	0.00266502	0.00767422	0.00306658	STAT3/PPARA	2
GO:1905209	positive regulation of cardiocyte differentiation	0.0289855	21/18800	0.00266502	0.00767422	0.00306658	TGFB1/BMP4	2
GO:0005996	monosaccharide metabolic process	0.0724638	261/18800	0.0027061	0.00778567	0.00311112	INSR/PPARD/GSK3B/CRTC2/PPARA	5
GO:0007292	female gamete generation	0.057971	158/18800	0.00271693	0.00780997	0.00312083	ERCC1/PLAT/CTNNB1/BCL2	4
GO:0061045	negative regulation of wound healing	0.0434783	76/18800	0.00274662	0.0078884	0.00315217	PLAT/SERPINE1/PRKCD	3
GO:0010466	negative regulation of peptidase activity	0.0724638	262/18800	0.002751	0.00789408	0.00315444	TIMP1/HGF/SERPINE1/MMP9/VEGFA	5
GO:1990845	adaptive thermogenesis	0.057971	159/18800	0.00277942	0.00796865	0.00318424	UCP1/RB1/UCP2/VEGFA	4
GO:0003018	vascular process in circulatory system	0.0724638	263/18800	0.00279645	0.00801046	0.00320094	TGFB1/ABCG2/INSR/PPARD/VEGFA	5
GO:0009259	ribonucleotide metabolic process	0.0869565	384/18800	0.00283421	0.00811152	0.00324133	TGFB1/STAT3/HMGCR/INSR/HIF1A/PPARA	6
GO:0030522	intracellular receptor signaling pathway	0.0724638	264/18800	0.00284244	0.00812799	0.00324791	NFKBIA/AHR/STAT3/PPARD/PPARA	5
GO:0043154	negative regulation of cysteine-type endopeptidase activity involved in apoptotic process	0.0434783	77/18800	0.00285052	0.00813688	0.00325146	HGF/MMP9/VEGFA	3
GO:0051149	positive regulation of muscle cell differentiation	0.0434783	77/18800	0.00285052	0.00813688	0.00325146	TGFB1/BMP4/BCL2	3
GO:0050806	positive regulation of synaptic transmission	0.057971	161/18800	0.00290736	0.00821945	0.00328445	MAPK1/NTRK2/PRKCE/GSK3B	4
GO:0002089	lens morphogenesis in camera-type eye	0.0289855	22/18800	0.00292459	0.00821945	0.00328445	BMP4/CTNNB1	2
GO:0002320	lymphoid progenitor cell differentiation	0.0289855	22/18800	0.00292459	0.00821945	0.00328445	BMP4/BCL2	2
GO:0002834	regulation of response to tumor cell	0.0289855	22/18800	0.00292459	0.00821945	0.00328445	AHR/HMGB1	2
GO:0006063	uronic acid metabolic process	0.0289855	22/18800	0.00292459	0.00821945	0.00328445	UGT1A6/PRKCE	2
GO:0006883	cellular sodium ion homeostasis	0.0289855	22/18800	0.00292459	0.00821945	0.00328445	IL1A/NEDD4L	2
GO:0019585	glucuronate metabolic process	0.0289855	22/18800	0.00292459	0.00821945	0.00328445	UGT1A6/PRKCE	2
GO:0032928	regulation of superoxide anion generation	0.0289855	22/18800	0.00292459	0.00821945	0.00328445	TGFB1/PRKCD	2
GO:0036344	platelet morphogenesis	0.0289855	22/18800	0.00292459	0.00821945	0.00328445	CASP3/CASP9	2
GO:0045980	negative regulation of nucleotide metabolic process	0.0289855	22/18800	0.00292459	0.00821945	0.00328445	STAT3/PPARA	2
GO:0046885	regulation of hormone biosynthetic process	0.0289855	22/18800	0.00292459	0.00821945	0.00328445	NFKB1/HIF1A	2
GO:0048634	regulation of muscle organ development	0.0289855	22/18800	0.00292459	0.00821945	0.00328445	TGFB1/BMP4	2
GO:0051220	cytoplasmic sequestering of protein	0.0289855	22/18800	0.00292459	0.00821945	0.00328445	NFKBIA/IL10	2
GO:0061042	vascular wound healing	0.0289855	22/18800	0.00292459	0.00821945	0.00328445	SERPINE1/VEGFA	2
GO:0072574	hepatocyte proliferation	0.0289855	22/18800	0.00292459	0.00821945	0.00328445	CFLAR/IL6	2
GO:0072575	epithelial cell proliferation involved in liver morphogenesis	0.0289855	22/18800	0.00292459	0.00821945	0.00328445	CFLAR/IL6	2
GO:1903589	positive regulation of blood vessel endothelial cell proliferation involved in sprouting angiogenesis	0.0289855	22/18800	0.00292459	0.00821945	0.00328445	HMOX1/VEGFA	2
GO:2000725	regulation of cardiac muscle cell differentiation	0.0289855	22/18800	0.00292459	0.00821945	0.00328445	TGFB1/BMP4	2
GO:0007492	endoderm development	0.0434783	78/18800	0.00295681	0.00830288	0.00331779	BMP4/CTNNB1/MMP9	3
GO:0032200	telomere organization	0.057971	162/18800	0.00297282	0.0083407	0.0033329	ERCC1/MAPK1/MAPK3/CTNNB1	4
GO:0006970	response to osmotic stress	0.0434783	79/18800	0.00306552	0.00858606	0.00343095	RELB/BAX/CASP3	3
GO:0072332	intrinsic apoptotic signaling pathway by p53 class mediator	0.0434783	79/18800	0.00306552	0.00858606	0.00343095	BAX/BCL2/CDKN1A	3
GO:0008306	associative learning	0.0434783	80/18800	0.00317665	0.00888974	0.0035523	HMGCR/FOS/HIF1A	3
GO:0002053	positive regulation of mesenchymal cell proliferation	0.0289855	23/18800	0.00319555	0.00889704	0.00355522	CHRD/CTNNB1	2
GO:0003323	type B pancreatic cell development	0.0289855	23/18800	0.00319555	0.00889704	0.00355522	BMP4/GSK3B	2
GO:0032331	negative regulation of chondrocyte differentiation	0.0289855	23/18800	0.00319555	0.00889704	0.00355522	BMP4/CTNNB1	2
GO:0046697	decidualization	0.0289855	23/18800	0.00319555	0.00889704	0.00355522	PPARD/SPP1	2
GO:0072576	liver morphogenesis	0.0289855	23/18800	0.00319555	0.00889704	0.00355522	CFLAR/IL6	2
GO:1900120	regulation of receptor binding	0.0289855	23/18800	0.00319555	0.00889704	0.00355522	MMP9/IL10	2
GO:0006163	purine nucleotide metabolic process	0.0869565	394/18800	0.00321712	0.0089419	0.00357314	TGFB1/STAT3/HMGCR/INSR/HIF1A/PPARA	6
GO:0019693	ribose phosphate metabolic process	0.0869565	394/18800	0.00321712	0.0089419	0.00357314	TGFB1/STAT3/HMGCR/INSR/HIF1A/PPARA	6
GO:0046034	ATP metabolic process	0.0724638	273/18800	0.00328138	0.00911277	0.00364142	TGFB1/STAT3/INSR/HIF1A/PPARA	5
GO:0010833	telomere maintenance via telomere lengthening	0.0434783	81/18800	0.00329024	0.00911421	0.00364199	MAPK1/MAPK3/CTNNB1	3
GO:0030500	regulation of bone mineralization	0.0434783	81/18800	0.00329024	0.00911421	0.00364199	TGFB1/BMP4/HIF1A	3
GO:0055013	cardiac muscle cell development	0.0434783	81/18800	0.00329024	0.00911421	0.00364199	BMP4/VEGFA/PPARA	3
GO:0002700	regulation of production of molecular mediator of immune response	0.057971	167/18800	0.0033153	0.00916815	0.00366355	HMOX1/TGFB1/IL6/IL10	4
GO:0034250	positive regulation of cellular amide metabolic process	0.057971	167/18800	0.0033153	0.00916815	0.00366355	ERBB2/CASP3/IL6/PRKCD	4
GO:2001021	negative regulation of response to DNA damage stimulus	0.0434783	82/18800	0.00340629	0.0094118	0.00376091	ERCC1/BCL2L1/BCL2	3
GO:0001759	organ induction	0.0289855	24/18800	0.00347782	0.00950526	0.00379826	BMP4/CTNNB1	2
GO:0019835	cytolysis	0.0289855	24/18800	0.00347782	0.00950526	0.00379826	LBP/TGFB1	2
GO:0032740	positive regulation of interleukin-17 production	0.0289855	24/18800	0.00347782	0.00950526	0.00379826	TGFB1/IL6	2
GO:0035162	embryonic hemopoiesis	0.0289855	24/18800	0.00347782	0.00950526	0.00379826	HIF1A/VEGFA	2
GO:0036003	positive regulation of transcription from RNA polymerase II promoter in response to stress	0.0289855	24/18800	0.00347782	0.00950526	0.00379826	HIF1A/VEGFA	2
GO:0042730	fibrinolysis	0.0289855	24/18800	0.00347782	0.00950526	0.00379826	PLAT/SERPINE1	2
GO:0045649	regulation of macrophage differentiation	0.0289855	24/18800	0.00347782	0.00950526	0.00379826	TGFB1/RB1	2
GO:0051043	regulation of membrane protein ectodomain proteolysis	0.0289855	24/18800	0.00347782	0.00950526	0.00379826	TIMP1/IL10	2
GO:0072202	cell differentiation involved in metanephros development	0.0289855	24/18800	0.00347782	0.00950526	0.00379826	BMP4/CTNNB1	2
GO:1901028	regulation of mitochondrial outer membrane permeabilization involved in apoptotic signaling pathway	0.0289855	24/18800	0.00347782	0.00950526	0.00379826	GSK3B/BBC3	2
GO:1901863	positive regulation of muscle tissue development	0.0289855	24/18800	0.00347782	0.00950526	0.00379826	CTNNB1/BCL2	2
GO:2000737	negative regulation of stem cell differentiation	0.0289855	24/18800	0.00347782	0.00950526	0.00379826	STAT3/GSK3B	2
GO:2001026	regulation of endothelial cell chemotaxis	0.0289855	24/18800	0.00347782	0.00950526	0.00379826	MET/VEGFA	2
GO:0014910	regulation of smooth muscle cell migration	0.0434783	83/18800	0.00352482	0.0095778	0.00382724	SERPINE1/PPARD/BCL2	3
GO:0030641	regulation of cellular pH	0.0434783	83/18800	0.00352482	0.0095778	0.00382724	MAPK1/MAPK3/BCL2	3
GO:0032092	positive regulation of protein binding	0.0434783	83/18800	0.00352482	0.0095778	0.00382724	BMP4/GSK3B/MMP9	3
GO:0032413	negative regulation of ion transmembrane transporter activity	0.0434783	83/18800	0.00352482	0.0095778	0.00382724	PRKCE/MMP9/NEDD4L	3
GO:0033273	response to vitamin	0.0434783	83/18800	0.00352482	0.0095778	0.00382724	IL1A/PPARD/SPP1	3
GO:0048041	focal adhesion assembly	0.0434783	83/18800	0.00352482	0.0095778	0.00382724	VCL/BCL2/VEGFA	3
GO:0048678	response to axon injury	0.0434783	83/18800	0.00352482	0.0095778	0.00382724	BAX/SPP1/BCL2	3
GO:0060402	calcium ion transport into cytosol	0.057971	171/18800	0.00360796	0.0097956	0.00391428	TRPA1/BAX/PRKCE/BCL2	4
GO:1900182	positive regulation of protein localization to nucleus	0.0434783	84/18800	0.00364585	0.00989027	0.0039521	NGFR/TGFB1/PRKCD	3
GO:0022412	cellular process involved in reproduction in multicellular organism	0.0869565	406/18800	0.0037263	0.0100804	0.00402808	ERCC1/BMP4/BAX/BCL2L1/CTNNB1/BCL2	6
GO:0007259	receptor signaling pathway via JAK-STAT	0.057971	173/18800	0.00376068	0.0100804	0.00402808	STAT3/STAT5B/IL6/IL10	4
GO:0044774	mitotic DNA integrity checkpoint signaling	0.0434783	85/18800	0.00376939	0.0100804	0.00402808	CDC6/CDK2/CDKN1A	3
GO:0046889	positive regulation of lipid biosynthetic process	0.0434783	85/18800	0.00376939	0.0100804	0.00402808	IL1A/PPARA/PRKCD	3
GO:2000117	negative regulation of cysteine-type endopeptidase activity	0.0434783	85/18800	0.00376939	0.0100804	0.00402808	HGF/MMP9/VEGFA	3
GO:2000177	regulation of neural precursor cell proliferation	0.0434783	85/18800	0.00376939	0.0100804	0.00402808	CTNNB1/HIF1A/VEGFA	3
GO:0031639	plasminogen activation	0.0289855	25/18800	0.0037713	0.0100804	0.00402808	PLAT/SERPINE1	2
GO:0032469	endoplasmic reticulum calcium ion homeostasis	0.0289855	25/18800	0.0037713	0.0100804	0.00402808	BAX/BCL2	2
GO:0032967	positive regulation of collagen biosynthetic process	0.0289855	25/18800	0.0037713	0.0100804	0.00402808	TGFB1/BMP4	2
GO:0033081	regulation of T cell differentiation in thymus	0.0289855	25/18800	0.0037713	0.0100804	0.00402808	BMP4/ERBB2	2
GO:0050927	positive regulation of positive chemotaxis	0.0289855	25/18800	0.0037713	0.0100804	0.00402808	PGF/VEGFA	2
GO:0051450	myoblast proliferation	0.0289855	25/18800	0.0037713	0.0100804	0.00402808	HGF/PPARD	2
GO:0060396	growth hormone receptor signaling pathway	0.0289855	25/18800	0.0037713	0.0100804	0.00402808	STAT3/STAT5B	2
GO:0072273	metanephric nephron morphogenesis	0.0289855	25/18800	0.0037713	0.0100804	0.00402808	BMP4/CTNNB1	2
GO:1903077	negative regulation of protein localization to plasma membrane	0.0289855	25/18800	0.0037713	0.0100804	0.00402808	TGFB1/BCL2L1	2
GO:1905048	regulation of metallopeptidase activity	0.0289855	25/18800	0.0037713	0.0100804	0.00402808	TIMP1/STAT3	2
GO:1905523	positive regulation of macrophage migration	0.0289855	25/18800	0.0037713	0.0100804	0.00402808	MAPK1/MAPK3	2
GO:1905564	positive regulation of vascular endothelial cell proliferation	0.0289855	25/18800	0.0037713	0.0100804	0.00402808	STAT3/HMGB1	2
GO:0034103	regulation of tissue remodeling	0.0434783	86/18800	0.00389547	0.0104038	0.0041573	TGFB1/SPP1/IL6	3
GO:0007254	JNK cascade	0.057971	175/18800	0.00391773	0.0104377	0.00417087	NFKB1/IL1A/EGFR/HMGB1	4
GO:0035265	organ growth	0.057971	175/18800	0.00391773	0.0104377	0.00417087	MMP13/BCL2/PPARA/SMAD1	4
GO:0046890	regulation of lipid biosynthetic process	0.057971	175/18800	0.00391773	0.0104377	0.00417087	NFKB1/IL1A/PPARA/PRKCD	4
GO:0002221	pattern recognition receptor signaling pathway	0.057971	176/18800	0.0039979	0.0106427	0.00425276	NFKBIA/LBP/PRKCE/HMGB1	4
GO:0050829	defense response to Gram-negative bacterium	0.0434783	87/18800	0.00402409	0.010695	0.00427367	LBP/SERPINE1/IL6	3
GO:0055006	cardiac cell development	0.0434783	87/18800	0.00402409	0.010695	0.00427367	BMP4/VEGFA/PPARA	3
GO:0044262	cellular carbohydrate metabolic process	0.0724638	287/18800	0.00405855	0.0107198	0.00428357	STAT3/INSR/PRKCE/GSK3B/PPARA	5
GO:0000737	DNA catabolic process, endonucleolytic	0.0289855	26/18800	0.00407593	0.0107198	0.00428357	BAX/IL6	2
GO:0001783	B cell apoptotic process	0.0289855	26/18800	0.00407593	0.0107198	0.00428357	BAX/IL10	2
GO:0002433	immune response-regulating cell surface receptor signaling pathway involved in phagocytosis	0.0289855	26/18800	0.00407593	0.0107198	0.00428357	PRKCE/PRKCD	2
GO:0010714	positive regulation of collagen metabolic process	0.0289855	26/18800	0.00407593	0.0107198	0.00428357	TGFB1/BMP4	2
GO:0030878	thyroid gland development	0.0289855	26/18800	0.00407593	0.0107198	0.00428357	MAPK1/MAPK3	2
GO:0032682	negative regulation of chemokine production	0.0289855	26/18800	0.00407593	0.0107198	0.00428357	IL6/IL10	2
GO:0033598	mammary gland epithelial cell proliferation	0.0289855	26/18800	0.00407593	0.0107198	0.00428357	MAPK1/BAX	2
GO:0038096	Fc-gamma receptor signaling pathway involved in phagocytosis	0.0289855	26/18800	0.00407593	0.0107198	0.00428357	PRKCE/PRKCD	2
GO:0050926	regulation of positive chemotaxis	0.0289855	26/18800	0.00407593	0.0107198	0.00428357	PGF/VEGFA	2
GO:0051204	protein insertion into mitochondrial membrane	0.0289855	26/18800	0.00407593	0.0107198	0.00428357	BAX/BBC3	2
GO:0070102	interleukin-6-mediated signaling pathway	0.0289855	26/18800	0.00407593	0.0107198	0.00428357	STAT3/IL6	2
GO:0071378	cellular response to growth hormone stimulus	0.0289855	26/18800	0.00407593	0.0107198	0.00428357	STAT3/STAT5B	2
GO:1901987	regulation of cell cycle phase transition	0.0869565	415/18800	0.00414591	0.0108951	0.00435362	CDC6/CDK2/RB1/EGFR/BCL2/CDKN1A	6
GO:0002709	regulation of T cell mediated immunity	0.0434783	88/18800	0.00415527	0.0109109	0.00435995	AHR/HMGB1/IL6	3
GO:0072521	purine-containing compound metabolic process	0.0869565	416/18800	0.00419461	0.0110054	0.0043977	TGFB1/STAT3/HMGCR/INSR/HIF1A/PPARA	6
GO:0001656	metanephros development	0.0434783	89/18800	0.00428903	0.0112351	0.00448951	BMP4/CTNNB1/BCL2	3
GO:0051591	response to cAMP	0.0434783	89/18800	0.00428903	0.0112351	0.00448951	PLAT/AHR/FOS	3
GO:0022409	positive regulation of cell-cell adhesion	0.0724638	291/18800	0.00430292	0.0112625	0.00450045	IL1A/STAT5B/HMGB1/IL6/IL10	5
GO:0002833	positive regulation of response to biotic stimulus	0.057971	180/18800	0.00432971	0.0113236	0.00452485	LBP/STAT5B/HMGB1/TBK1	4
GO:0050808	synapse organization	0.0869565	419/18800	0.00434326	0.01135	0.00453539	ERBB2/NTRK2/INSR/CTNNB1/IL10/YWHAZ	6
GO:0002092	positive regulation of receptor internalization	0.0289855	27/18800	0.00439161	0.0113765	0.00454601	INSR/VEGFA	2
GO:0002418	immune response to tumor cell	0.0289855	27/18800	0.00439161	0.0113765	0.00454601	AHR/HMGB1	2
GO:0007263	nitric oxide mediated signal transduction	0.0289855	27/18800	0.00439161	0.0113765	0.00454601	EGFR/VEGFA	2
GO:0010758	regulation of macrophage chemotaxis	0.0289855	27/18800	0.00439161	0.0113765	0.00454601	MAPK1/MAPK3	2
GO:0030262	apoptotic nuclear changes	0.0289855	27/18800	0.00439161	0.0113765	0.00454601	BAX/IL6	2
GO:0032607	interferon-alpha production	0.0289855	27/18800	0.00439161	0.0113765	0.00454601	IL10/TBK1	2
GO:0032647	regulation of interferon-alpha production	0.0289855	27/18800	0.00439161	0.0113765	0.00454601	IL10/TBK1	2
GO:0035774	positive regulation of insulin secretion involved in cellular response to glucose stimulus	0.0289855	27/18800	0.00439161	0.0113765	0.00454601	PPARD/HIF1A	2
GO:0072012	glomerulus vasculature development	0.0289855	27/18800	0.00439161	0.0113765	0.00454601	BMP4/CFLAR	2
GO:1904376	negative regulation of protein localization to cell periphery	0.0289855	27/18800	0.00439161	0.0113765	0.00454601	TGFB1/BCL2L1	2
GO:2000108	positive regulation of leukocyte apoptotic process	0.0289855	27/18800	0.00439161	0.0113765	0.00454601	BAX/IL10	2
GO:0001843	neural tube closure	0.0434783	90/18800	0.00442539	0.011455	0.00457735	TGFB1/BMP4/CASP3	3
GO:0140014	mitotic nuclear division	0.0724638	293/18800	0.00442898	0.0114552	0.00457745	CDC6/BMP4/IL1A/RB1/INSR	5
GO:0048562	embryonic organ morphogenesis	0.0724638	294/18800	0.00449298	0.0116116	0.00463994	MAPK1/BMP4/MAPK3/CTNNB1/HIF1A	5
GO:0032465	regulation of cytokinesis	0.0434783	91/18800	0.00456435	0.0117313	0.00468776	CDC6/BCL2L1/PRKCE	3
GO:0035304	regulation of protein dephosphorylation	0.0434783	91/18800	0.00456435	0.0117313	0.00468776	TGFB1/GSK3B/PRKCD	3
GO:0045638	negative regulation of myeloid cell differentiation	0.0434783	91/18800	0.00456435	0.0117313	0.00468776	NFKBIA/STAT5B/CTNNB1	3
GO:0060606	tube closure	0.0434783	91/18800	0.00456435	0.0117313	0.00468776	TGFB1/BMP4/CASP3	3
GO:0090277	positive regulation of peptide hormone secretion	0.0434783	91/18800	0.00456435	0.0117313	0.00468776	PRKCE/PPARD/HIF1A	3
GO:0090398	cellular senescence	0.0434783	91/18800	0.00456435	0.0117313	0.00468776	CDK2/CDKN1A/PRKCD	3
GO:1903351	cellular response to dopamine	0.0434783	91/18800	0.00456435	0.0117313	0.00468776	MAPK1/MAPK3/GSK3B	3
GO:0034470	ncRNA processing	0.0869565	424/18800	0.00459964	0.0118127	0.00472031	TGFB1/BMP4/STAT3/EGFR/IL6/SMAD1	6
GO:0007044	cell-substrate junction assembly	0.0434783	92/18800	0.00470593	0.0119858	0.00478949	VCL/BCL2/VEGFA	3
GO:0009953	dorsal/ventral pattern formation	0.0434783	92/18800	0.00470593	0.0119858	0.00478949	CHRD/BMP4/CTNNB1	3
GO:1903350	response to dopamine	0.0434783	92/18800	0.00470593	0.0119858	0.00478949	MAPK1/MAPK3/GSK3B	3
GO:0001958	endochondral ossification	0.0289855	28/18800	0.00471826	0.0119858	0.00478949	BMP4/MMP13	2
GO:0010800	positive regulation of peptidyl-threonine phosphorylation	0.0289855	28/18800	0.00471826	0.0119858	0.00478949	MAPK1/TGFB1	2
GO:0034123	positive regulation of toll-like receptor signaling pathway	0.0289855	28/18800	0.00471826	0.0119858	0.00478949	LBP/HMGB1	2
GO:0035116	embryonic hindlimb morphogenesis	0.0289855	28/18800	0.00471826	0.0119858	0.00478949	BMP4/CTNNB1	2
GO:0036075	replacement ossification	0.0289855	28/18800	0.00471826	0.0119858	0.00478949	BMP4/MMP13	2
GO:0042104	positive regulation of activated T cell proliferation	0.0289855	28/18800	0.00471826	0.0119858	0.00478949	STAT5B/HMGB1	2
GO:0048873	homeostasis of number of cells within a tissue	0.0289855	28/18800	0.00471826	0.0119858	0.00478949	BAX/BCL2	2
GO:0072539	T-helper 17 cell differentiation	0.0289855	28/18800	0.00471826	0.0119858	0.00478949	STAT3/IL6	2
GO:0090025	regulation of monocyte chemotaxis	0.0289855	28/18800	0.00471826	0.0119858	0.00478949	SERPINE1/HMGB1	2
GO:0090330	regulation of platelet aggregation	0.0289855	28/18800	0.00471826	0.0119858	0.00478949	IL6/PRKCD	2
GO:1903649	regulation of cytoplasmic transport	0.0289855	28/18800	0.00471826	0.0119858	0.00478949	MAPK1/MAPK3	2
GO:0002275	myeloid cell activation involved in immune response	0.0434783	93/18800	0.00485015	0.0122828	0.00490815	HMOX1/LBP/PRKCE	3
GO:0002793	positive regulation of peptide secretion	0.0434783	93/18800	0.00485015	0.0122828	0.00490815	PRKCE/PPARD/HIF1A	3
GO:0006885	regulation of pH	0.0434783	93/18800	0.00485015	0.0122828	0.00490815	MAPK1/MAPK3/BCL2	3
GO:0034109	homotypic cell-cell adhesion	0.0434783	93/18800	0.00485015	0.0122828	0.00490815	VCL/IL6/PRKCD	3
GO:0002429	immune response-activating cell surface receptor signaling pathway	0.0724638	300/18800	0.00489098	0.0123671	0.00494183	MAPK1/BAX/PRKCE/BCL2/PRKCD	5
GO:0002757	immune response-activating signal transduction	0.0724638	300/18800	0.00489098	0.0123671	0.00494183	MAPK1/BAX/PRKCE/BCL2/PRKCD	5
GO:0048709	oligodendrocyte differentiation	0.0434783	94/18800	0.00499702	0.0126255	0.00504507	ERBB2/NTRK2/CTNNB1	3
GO:0002068	glandular epithelial cell development	0.0289855	29/18800	0.0050558	0.0126569	0.00505763	BMP4/GSK3B	2
GO:0002313	mature B cell differentiation involved in immune response	0.0289855	29/18800	0.0050558	0.0126569	0.00505763	IL6/IL10	2
GO:0003156	regulation of animal organ formation	0.0289855	29/18800	0.0050558	0.0126569	0.00505763	BMP4/CTNNB1	2
GO:0003309	type B pancreatic cell differentiation	0.0289855	29/18800	0.0050558	0.0126569	0.00505763	BMP4/GSK3B	2
GO:0006921	cellular component disassembly involved in execution phase of apoptosis	0.0289855	29/18800	0.0050558	0.0126569	0.00505763	BAX/IL6	2
GO:0030212	hyaluronan metabolic process	0.0289855	29/18800	0.0050558	0.0126569	0.00505763	TGFB1/NFKB1	2
GO:0031571	mitotic G1 DNA damage checkpoint signaling	0.0289855	29/18800	0.0050558	0.0126569	0.00505763	CDK2/CDKN1A	2
GO:0060441	epithelial tube branching involved in lung morphogenesis	0.0289855	29/18800	0.0050558	0.0126569	0.00505763	BMP4/CTNNB1	2
GO:0061082	myeloid leukocyte cytokine production	0.0289855	29/18800	0.0050558	0.0126569	0.00505763	HMOX1/TGFB1	2
GO:0061437	renal system vasculature development	0.0289855	29/18800	0.0050558	0.0126569	0.00505763	BMP4/CFLAR	2
GO:0061440	kidney vasculature development	0.0289855	29/18800	0.0050558	0.0126569	0.00505763	BMP4/CFLAR	2
GO:1902175	regulation of oxidative stress-induced intrinsic apoptotic signaling pathway	0.0289855	29/18800	0.0050558	0.0126569	0.00505763	MCL1/HIF1A	2
GO:0043433	negative regulation of DNA-binding transcription factor activity	0.057971	190/18800	0.00523958	0.0130814	0.00522725	HMOX1/NFKBIA/RB1/IL10	4
GO:0050731	positive regulation of peptidyl-tyrosine phosphorylation	0.057971	190/18800	0.00523958	0.0130814	0.00522725	TGFB1/HGF/IL6/VEGFA	4
GO:0060401	cytosolic calcium ion transport	0.057971	190/18800	0.00523958	0.0130814	0.00522725	TRPA1/BAX/PRKCE/BCL2	4
GO:0032409	regulation of transporter activity	0.0724638	305/18800	0.00524133	0.0130814	0.00522725	PRKCE/MMP9/BCL2/PRKCD/NEDD4L	5
GO:0016236	macroautophagy	0.0724638	306/18800	0.00531348	0.0132514	0.00529518	HMOX1/MAPK3/CASP3/HIF1A/TBK1	5
GO:0051701	biological process involved in interaction with host	0.057971	191/18800	0.00533707	0.0133001	0.00531464	ICAM1/EGFR/BCL2L1/INSR	4
GO:0038094	Fc-gamma receptor signaling pathway	0.0289855	30/18800	0.00540415	0.0133555	0.0053368	PRKCE/PRKCD	2
GO:0040018	positive regulation of multicellular organism growth	0.0289855	30/18800	0.00540415	0.0133555	0.0053368	STAT5B/BCL2	2
GO:0043032	positive regulation of macrophage activation	0.0289855	30/18800	0.00540415	0.0133555	0.0053368	LBP/IL10	2
GO:0044819	mitotic G1/S transition checkpoint signaling	0.0289855	30/18800	0.00540415	0.0133555	0.0053368	CDK2/CDKN1A	2
GO:0061037	negative regulation of cartilage development	0.0289855	30/18800	0.00540415	0.0133555	0.0053368	BMP4/CTNNB1	2
GO:0070168	negative regulation of biomineral tissue development	0.0289855	30/18800	0.00540415	0.0133555	0.0053368	TGFB1/HIF1A	2
GO:0070498	interleukin-1-mediated signaling pathway	0.0289855	30/18800	0.00540415	0.0133555	0.0053368	MAPK3/IL6	2
GO:0071480	cellular response to gamma radiation	0.0289855	30/18800	0.00540415	0.0133555	0.0053368	BCL2L1/CDKN1A	2
GO:0090151	establishment of protein localization to mitochondrial membrane	0.0289855	30/18800	0.00540415	0.0133555	0.0053368	BAX/BBC3	2
GO:1902230	negative regulation of intrinsic apoptotic signaling pathway in response to DNA damage	0.0289855	30/18800	0.00540415	0.0133555	0.0053368	BCL2L1/BCL2	2
GO:1903579	negative regulation of ATP metabolic process	0.0289855	30/18800	0.00540415	0.0133555	0.0053368	STAT3/PPARA	2
GO:0010389	regulation of G2/M transition of mitotic cell cycle	0.0434783	97/18800	0.00545365	0.0134575	0.00537757	CDC6/CDK2/CDKN1A	3
GO:0043279	response to alkaloid	0.0434783	97/18800	0.00545365	0.0134575	0.00537757	BCL2L1/PRKCE/CASP3	3
GO:0044772	mitotic cell cycle phase transition	0.0869565	440/18800	0.0054956	0.0135509	0.00541486	CDC6/CDK2/RB1/EGFR/BCL2/CDKN1A	6
GO:0006909	phagocytosis	0.0724638	310/18800	0.00560916	0.0137635	0.00549984	LBP/PRKCE/MET/HMGB1/PRKCD	5
GO:0032479	regulation of type I interferon production	0.0434783	98/18800	0.00561125	0.0137635	0.00549984	RELB/IL10/TBK1	3
GO:0032606	type I interferon production	0.0434783	98/18800	0.00561125	0.0137635	0.00549984	RELB/IL10/TBK1	3
GO:0060291	long-term synaptic potentiation	0.0434783	98/18800	0.00561125	0.0137635	0.00549984	MAPK1/NTRK2/GSK3B	3
GO:0120162	positive regulation of cold-induced thermogenesis	0.0434783	98/18800	0.00561125	0.0137635	0.00549984	UCP1/UCP2/VEGFA	3
GO:0150115	cell-substrate junction organization	0.0434783	98/18800	0.00561125	0.0137635	0.00549984	VCL/BCL2/VEGFA	3
GO:1904063	negative regulation of cation transmembrane transport	0.0434783	98/18800	0.00561125	0.0137635	0.00549984	PRKCE/MMP9/NEDD4L	3
GO:0002440	production of molecular mediator of immune response	0.0724638	312/18800	0.00576128	0.0140208	0.00560266	ERCC1/HMOX1/TGFB1/IL6/IL10	5
GO:0005979	regulation of glycogen biosynthetic process	0.0289855	31/18800	0.00576322	0.0140208	0.00560266	INSR/GSK3B	2
GO:0010962	regulation of glucan biosynthetic process	0.0289855	31/18800	0.00576322	0.0140208	0.00560266	INSR/GSK3B	2
GO:0033137	negative regulation of peptidyl-serine phosphorylation	0.0289855	31/18800	0.00576322	0.0140208	0.00560266	HGF/BAX	2
GO:0035767	endothelial cell chemotaxis	0.0289855	31/18800	0.00576322	0.0140208	0.00560266	MET/VEGFA	2
GO:0045577	regulation of B cell differentiation	0.0289855	31/18800	0.00576322	0.0140208	0.00560266	STAT5B/IL10	2
GO:0045737	positive regulation of cyclin-dependent protein serine/threonine kinase activity	0.0289855	31/18800	0.00576322	0.0140208	0.00560266	CDC6/EGFR	2
GO:0060055	angiogenesis involved in wound healing	0.0289855	31/18800	0.00576322	0.0140208	0.00560266	SERPINE1/VEGFA	2
GO:0060390	regulation of SMAD protein signal transduction	0.0289855	31/18800	0.00576322	0.0140208	0.00560266	TGFB1/BMP4	2
GO:0061036	positive regulation of cartilage development	0.0289855	31/18800	0.00576322	0.0140208	0.00560266	BMP4/SMAD1	2
GO:0110150	negative regulation of biomineralization	0.0289855	31/18800	0.00576322	0.0140208	0.00560266	TGFB1/HIF1A	2
GO:0015908	fatty acid transport	0.0434783	99/18800	0.00577157	0.0140307	0.00560661	IL1A/PPARD/PPARA	3
GO:0014013	regulation of gliogenesis	0.0434783	100/18800	0.00593461	0.0143951	0.0057522	TGFB1/CTNNB1/IL6	3
GO:0031341	regulation of cell killing	0.0434783	100/18800	0.00593461	0.0143951	0.0057522	ICAM1/STAT5B/BCL2L1	3
GO:1901992	positive regulation of mitotic cell cycle phase transition	0.0434783	100/18800	0.00593461	0.0143951	0.0057522	CDC6/RB1/EGFR	3
GO:0048167	regulation of synaptic plasticity	0.057971	198/18800	0.00605375	0.0146732	0.00586334	MAPK1/PLAT/NTRK2/GSK3B	4
GO:0048477	oogenesis	0.0434783	101/18800	0.0061004	0.014702	0.00587485	ERCC1/CTNNB1/BCL2	3
GO:0070167	regulation of biomineral tissue development	0.0434783	101/18800	0.0061004	0.014702	0.00587485	TGFB1/BMP4/HIF1A	3
GO:0003338	metanephros morphogenesis	0.0289855	32/18800	0.00613294	0.014702	0.00587485	BMP4/CTNNB1	2
GO:0006308	DNA catabolic process	0.0289855	32/18800	0.00613294	0.014702	0.00587485	BAX/IL6	2
GO:0010165	response to X-ray	0.0289855	32/18800	0.00613294	0.014702	0.00587485	ERCC1/CASP3	2
GO:0032480	negative regulation of type I interferon production	0.0289855	32/18800	0.00613294	0.014702	0.00587485	RELB/IL10	2
GO:0033028	myeloid cell apoptotic process	0.0289855	32/18800	0.00613294	0.014702	0.00587485	BCL2/IL6	2
GO:0035883	enteroendocrine cell differentiation	0.0289855	32/18800	0.00613294	0.014702	0.00587485	BMP4/GSK3B	2
GO:0045684	positive regulation of epidermis development	0.0289855	32/18800	0.00613294	0.014702	0.00587485	BMP4/PPARD	2
GO:0046320	regulation of fatty acid oxidation	0.0289855	32/18800	0.00613294	0.014702	0.00587485	PPARD/PPARA	2
GO:0060914	heart formation	0.0289855	32/18800	0.00613294	0.014702	0.00587485	BMP4/CTNNB1	2
GO:0070570	regulation of neuron projection regeneration	0.0289855	32/18800	0.00613294	0.014702	0.00587485	HGF/SPP1	2
GO:0090183	regulation of kidney development	0.0289855	32/18800	0.00613294	0.014702	0.00587485	BMP4/VEGFA	2
GO:1900745	positive regulation of p38MAPK cascade	0.0289855	32/18800	0.00613294	0.014702	0.00587485	BMP4/VEGFA	2
GO:1902624	positive regulation of neutrophil migration	0.0289855	32/18800	0.00613294	0.014702	0.00587485	LBP/IL1A	2
GO:0019058	viral life cycle	0.0724638	317/18800	0.00615433	0.0147425	0.00589104	ICAM1/EGFR/INSR/BCL2/PPARA	5
GO:0015849	organic acid transport	0.0724638	318/18800	0.00623516	0.0149252	0.00596404	ABCG2/IL1A/NTRK2/PPARD/PPARA	5
GO:0016055	Wnt signaling pathway	0.0869565	452/18800	0.00624725	0.0149432	0.00597125	TBL1X/TGFB1/NFKB1/EGFR/GSK3B/CTNNB1	6
GO:0062014	negative regulation of small molecule metabolic process	0.0434783	102/18800	0.00626893	0.0149842	0.0059876	NFKB1/STAT3/PPARA	3
GO:0198738	cell-cell signaling by wnt	0.0869565	454/18800	0.00637948	0.0152373	0.00608874	TBL1X/TGFB1/NFKB1/EGFR/GSK3B/CTNNB1	6
GO:0010522	regulation of calcium ion transport into cytosol	0.0434783	103/18800	0.00644023	0.0153488	0.00613332	BAX/PRKCE/BCL2	3
GO:0031058	positive regulation of histone modification	0.0434783	103/18800	0.00644023	0.0153488	0.00613332	MAPK3/CTNNB1/VEGFA	3
GO:0110149	regulation of biomineralization	0.0434783	103/18800	0.00644023	0.0153488	0.00613332	TGFB1/BMP4/HIF1A	3
GO:0001893	maternal placenta development	0.0289855	33/18800	0.00651322	0.0153996	0.0061536	PPARD/SPP1	2
GO:0002431	Fc receptor mediated stimulatory signaling pathway	0.0289855	33/18800	0.00651322	0.0153996	0.0061536	PRKCE/PRKCD	2
GO:0006298	mismatch repair	0.0289855	33/18800	0.00651322	0.0153996	0.0061536	ERCC1/HMGB1	2
GO:0045736	negative regulation of cyclin-dependent protein serine/threonine kinase activity	0.0289855	33/18800	0.00651322	0.0153996	0.0061536	CASP3/CDKN1A	2
GO:0048333	mesodermal cell differentiation	0.0289855	33/18800	0.00651322	0.0153996	0.0061536	BMP4/SMAD1	2
GO:0051930	regulation of sensory perception of pain	0.0289855	33/18800	0.00651322	0.0153996	0.0061536	IL1A/IL10	2
GO:0051931	regulation of sensory perception	0.0289855	33/18800	0.00651322	0.0153996	0.0061536	IL1A/IL10	2
GO:0070229	negative regulation of lymphocyte apoptotic process	0.0289855	33/18800	0.00651322	0.0153996	0.0061536	BMP4/HIF1A	2
GO:1904030	negative regulation of cyclin-dependent protein kinase activity	0.0289855	33/18800	0.00651322	0.0153996	0.0061536	CASP3/CDKN1A	2
GO:1905476	negative regulation of protein localization to membrane	0.0289855	33/18800	0.00651322	0.0153996	0.0061536	TGFB1/BCL2L1	2
GO:2000191	regulation of fatty acid transport	0.0289855	33/18800	0.00651322	0.0153996	0.0061536	IL1A/PPARA	2
GO:0019218	regulation of steroid metabolic process	0.0434783	104/18800	0.00661431	0.0156048	0.00623561	NFKB1/IL1A/STAT5B	3
GO:0034766	negative regulation of ion transmembrane transport	0.0434783	104/18800	0.00661431	0.0156048	0.00623561	PRKCE/MMP9/NEDD4L	3
GO:0050830	defense response to Gram-positive bacterium	0.0434783	104/18800	0.00661431	0.0156048	0.00623561	LBP/IL6/TBK1	3
GO:0071868	cellular response to monoamine stimulus	0.0434783	105/18800	0.00679117	0.015999	0.00639314	MAPK1/MAPK3/GSK3B	3
GO:0071870	cellular response to catecholamine stimulus	0.0434783	105/18800	0.00679117	0.015999	0.00639314	MAPK1/MAPK3/GSK3B	3
GO:0007204	positive regulation of cytosolic calcium ion concentration	0.0724638	325/18800	0.00682202	0.0160602	0.00641757	TRPA1/BAX/PRKCE/HMGB1/BCL2	5
GO:0045216	cell-cell junction organization	0.057971	205/18800	0.00683197	0.016072	0.00642231	VCL/TGFB1/CTNNB1/VEGFA	4
GO:0002335	mature B cell differentiation	0.0289855	34/18800	0.00690399	0.0161718	0.00646218	IL6/IL10	2
GO:0031128	developmental induction	0.0289855	34/18800	0.00690399	0.0161718	0.00646218	BMP4/CTNNB1	2
GO:0032743	positive regulation of interleukin-2 production	0.0289855	34/18800	0.00690399	0.0161718	0.00646218	IL1A/STAT5B	2
GO:0070232	regulation of T cell apoptotic process	0.0289855	34/18800	0.00690399	0.0161718	0.00646218	BMP4/HIF1A	2
GO:0090322	regulation of superoxide metabolic process	0.0289855	34/18800	0.00690399	0.0161718	0.00646218	TGFB1/PRKCD	2
GO:2000352	negative regulation of endothelial cell apoptotic process	0.0289855	34/18800	0.00690399	0.0161718	0.00646218	SERPINE1/ICAM1	2
GO:0007631	feeding behavior	0.0434783	106/18800	0.00697083	0.0162934	0.00651078	STAT3/NTRK2/FOS	3
GO:0032410	negative regulation of transporter activity	0.0434783	106/18800	0.00697083	0.0162934	0.00651078	PRKCE/MMP9/NEDD4L	3
GO:0060840	artery development	0.0434783	106/18800	0.00697083	0.0162934	0.00651078	NGFR/BMP4/VEGFA	3
GO:0016042	lipid catabolic process	0.0724638	327/18800	0.00699658	0.016342	0.00653018	PRKCE/PPARD/SPP1/PPARA/PRKCD	5
GO:0002768	immune response-regulating cell surface receptor signaling pathway	0.0724638	328/18800	0.00708503	0.0165368	0.00660802	MAPK1/BAX/PRKCE/BCL2/PRKCD	5
GO:0030100	regulation of endocytosis	0.057971	208/18800	0.00718487	0.0167579	0.00669636	SERPINE1/INSR/VEGFA/NEDD4L	4
GO:0001569	branching involved in blood vessel morphogenesis	0.0289855	35/18800	0.00730516	0.016954	0.00677473	CTNNB1/VEGFA	2
GO:0010762	regulation of fibroblast migration	0.0289855	35/18800	0.00730516	0.016954	0.00677473	TGFB1/PRKCE	2
GO:0034110	regulation of homotypic cell-cell adhesion	0.0289855	35/18800	0.00730516	0.016954	0.00677473	IL6/PRKCD	2
GO:0035137	hindlimb morphogenesis	0.0289855	35/18800	0.00730516	0.016954	0.00677473	BMP4/CTNNB1	2
GO:0042462	eye photoreceptor cell development	0.0289855	35/18800	0.00730516	0.016954	0.00677473	NTRK2/VEGFA	2
GO:0050869	negative regulation of B cell activation	0.0289855	35/18800	0.00730516	0.016954	0.00677473	CASP3/IL10	2
GO:0090050	positive regulation of cell migration involved in sprouting angiogenesis	0.0289855	35/18800	0.00730516	0.016954	0.00677473	HMOX1/VEGFA	2
GO:0007173	epidermal growth factor receptor signaling pathway	0.0434783	108/18800	0.00733859	0.0169595	0.00677693	TGFB1/EGFR/MMP9	3
GO:0021761	limbic system development	0.0434783	108/18800	0.00733859	0.0169595	0.00677693	BAX/CASP3/GSK3B	3
GO:0061387	regulation of extent of cell growth	0.0434783	108/18800	0.00733859	0.0169595	0.00677693	GSK3B/SPP1/VEGFA	3
GO:0071867	response to monoamine	0.0434783	108/18800	0.00733859	0.0169595	0.00677693	MAPK1/MAPK3/GSK3B	3
GO:0071869	response to catecholamine	0.0434783	108/18800	0.00733859	0.0169595	0.00677693	MAPK1/MAPK3/GSK3B	3
GO:1902749	regulation of cell cycle G2/M phase transition	0.0434783	108/18800	0.00733859	0.0169595	0.00677693	CDC6/CDK2/CDKN1A	3
GO:0009408	response to heat	0.0434783	109/18800	0.0075267	0.017382	0.00694575	HMOX1/IL1A/GSK3B	3
GO:0042180	cellular ketone metabolic process	0.057971	211/18800	0.00754963	0.0174226	0.006962	STAT5B/PRKCE/PPARD/PPARA	4
GO:0030224	monocyte differentiation	0.0289855	36/18800	0.00771665	0.0177604	0.00709696	BMP4/VEGFA	2
GO:0032350	regulation of hormone metabolic process	0.0289855	36/18800	0.00771665	0.0177604	0.00709696	NFKB1/HIF1A	2
GO:0071312	cellular response to alkaloid	0.0289855	36/18800	0.00771665	0.0177604	0.00709696	BCL2L1/CASP3	2
GO:0048259	regulation of receptor-mediated endocytosis	0.0434783	110/18800	0.00771766	0.0177604	0.00709696	SERPINE1/INSR/VEGFA	3
GO:0003161	cardiac conduction system development	0.0289855	37/18800	0.00813839	0.018637	0.00744725	BMP4/SMAD1	2
GO:0010092	specification of animal organ identity	0.0289855	37/18800	0.00813839	0.018637	0.00744725	BMP4/CTNNB1	2
GO:0030279	negative regulation of ossification	0.0289855	37/18800	0.00813839	0.018637	0.00744725	BCL2/HIF1A	2
GO:0038179	neurotrophin signaling pathway	0.0289855	37/18800	0.00813839	0.018637	0.00744725	NTRK2/CASP3	2
GO:0042092	type 2 immune response	0.0289855	37/18800	0.00813839	0.018637	0.00744725	IL6/IL10	2
GO:0045730	respiratory burst	0.0289855	37/18800	0.00813839	0.018637	0.00744725	LBP/INSR	2
GO:0070873	regulation of glycogen metabolic process	0.0289855	37/18800	0.00813839	0.018637	0.00744725	INSR/GSK3B	2
GO:0016064	immunoglobulin mediated immune response	0.057971	216/18800	0.00818439	0.0187292	0.00748411	ERCC1/TGFB1/IL10/PRKCD	4
GO:0031346	positive regulation of cell projection organization	0.0724638	341/18800	0.00830724	0.0189848	0.00758624	HGF/NTRK2/CFLAR/GSK3B/VEGFA	5
GO:0002526	acute inflammatory response	0.0434783	113/18800	0.00830766	0.0189848	0.00758624	LBP/IL1A/IL6	3
GO:0002377	immunoglobulin production	0.057971	218/18800	0.00844782	0.0192916	0.00770885	ERCC1/TGFB1/IL6/IL10	4
GO:0003014	renal system process	0.0434783	114/18800	0.00851008	0.0194203	0.00776025	ABCG2/BMP4/BCL2	3
GO:0006270	DNA replication initiation	0.0289855	38/18800	0.0085703	0.0194615	0.00777673	CDC6/CDK2	2
GO:0040036	regulation of fibroblast growth factor receptor signaling pathway	0.0289855	38/18800	0.0085703	0.0194615	0.00777673	NGFR/CTNNB1	2
GO:0043403	skeletal muscle tissue regeneration	0.0289855	38/18800	0.0085703	0.0194615	0.00777673	PPARD/CFLAR	2
GO:0045191	regulation of isotype switching	0.0289855	38/18800	0.0085703	0.0194615	0.00777673	TGFB1/IL10	2
GO:0048246	macrophage chemotaxis	0.0289855	38/18800	0.0085703	0.0194615	0.00777673	MAPK1/MAPK3	2
GO:0060416	response to growth hormone	0.0289855	38/18800	0.0085703	0.0194615	0.00777673	STAT3/STAT5B	2
GO:1902229	regulation of intrinsic apoptotic signaling pathway in response to DNA damage	0.0289855	38/18800	0.0085703	0.0194615	0.00777673	BCL2L1/BCL2	2
GO:0019724	B cell mediated immunity	0.057971	219/18800	0.00858159	0.0194615	0.00777673	ERCC1/TGFB1/IL10/PRKCD	4
GO:0043583	ear development	0.057971	219/18800	0.00858159	0.0194615	0.00777673	MAPK1/BMP4/MAPK3/BCL2	4
GO:0090288	negative regulation of cellular response to growth factor stimulus	0.0434783	115/18800	0.00871537	0.0197512	0.0078925	NGFR/CHRD/CFLAR	3
GO:0009117	nucleotide metabolic process	0.0869565	487/18800	0.00886824	0.0200699	0.00801984	TGFB1/STAT3/HMGCR/INSR/HIF1A/PPARA	6
GO:0090066	regulation of anatomical structure size	0.0869565	487/18800	0.00886824	0.0200699	0.00801984	PRKCE/PPARD/GSK3B/SPP1/VEGFA/PRKCD	6
GO:0007265	Ras protein signal transduction	0.0724638	347/18800	0.008918	0.0201673	0.00805874	NGFR/CDK2/RB1/MET/CDKN1A	5
GO:1904892	regulation of receptor signaling pathway via STAT	0.0434783	116/18800	0.00892357	0.0201673	0.00805874	TGFB1/IL6/IL10	3
GO:0014912	negative regulation of smooth muscle cell migration	0.0289855	39/18800	0.0090123	0.0202839	0.00810533	SERPINE1/PPARD	2
GO:0032570	response to progesterone	0.0289855	39/18800	0.0090123	0.0202839	0.00810533	TGFB1/FOS	2
GO:0042307	positive regulation of protein import into nucleus	0.0289855	39/18800	0.0090123	0.0202839	0.00810533	TGFB1/PRKCD	2
GO:0045923	positive regulation of fatty acid metabolic process	0.0289855	39/18800	0.0090123	0.0202839	0.00810533	PPARD/PPARA	2
GO:0071470	cellular response to osmotic stress	0.0289855	39/18800	0.0090123	0.0202839	0.00810533	RELB/CASP3	2
GO:0097242	amyloid-beta clearance	0.0289855	39/18800	0.0090123	0.0202839	0.00810533	HMGCR/INSR	2
GO:0050870	positive regulation of T cell activation	0.057971	223/18800	0.0091306	0.0205311	0.00820412	IL1A/STAT5B/HMGB1/IL6	4
GO:0002708	positive regulation of lymphocyte mediated immunity	0.0434783	117/18800	0.00913467	0.0205311	0.00820412	TGFB1/STAT5B/IL6	3
GO:0032535	regulation of cellular component size	0.0724638	351/18800	0.00934207	0.0209689	0.00837909	PRKCE/GSK3B/SPP1/VEGFA/PRKCD	5
GO:0008286	insulin receptor signaling pathway	0.0434783	118/18800	0.00934868	0.0209689	0.00837909	INSR/GSK3B/PRKCD	3
GO:0043500	muscle adaptation	0.0434783	118/18800	0.00934868	0.0209689	0.00837909	HMOX1/CFLAR/PPARA	3
GO:0045740	positive regulation of DNA replication	0.0289855	40/18800	0.0094643	0.0211848	0.00846534	CDK2/EGFR	2
GO:0072210	metanephric nephron development	0.0289855	40/18800	0.0094643	0.0211848	0.00846534	BMP4/CTNNB1	2
GO:0072538	T-helper 17 type immune response	0.0289855	40/18800	0.0094643	0.0211848	0.00846534	STAT3/IL6	2
GO:0006091	generation of precursor metabolites and energy	0.0869565	494/18800	0.00947492	0.0211941	0.00846905	STAT3/INSR/PPARD/GSK3B/HIF1A/PPARA	6
GO:0006753	nucleoside phosphate metabolic process	0.0869565	495/18800	0.00956396	0.0213532	0.00853264	TGFB1/STAT3/HMGCR/INSR/HIF1A/PPARA	6
GO:0030326	embryonic limb morphogenesis	0.0434783	119/18800	0.00956561	0.0213532	0.00853264	BMP4/BAX/CTNNB1	3
GO:0035113	embryonic appendage morphogenesis	0.0434783	119/18800	0.00956561	0.0213532	0.00853264	BMP4/BAX/CTNNB1	3
GO:0002702	positive regulation of production of molecular mediator of immune response	0.0434783	120/18800	0.00978547	0.0218291	0.00872281	TGFB1/IL6/IL10	3
GO:0051480	regulation of cytosolic calcium ion concentration	0.0724638	356/18800	0.00989154	0.0220507	0.00881137	TRPA1/BAX/PRKCE/HMGB1/BCL2	5
GO:0033574	response to testosterone	0.0289855	41/18800	0.00992625	0.0220681	0.00881829	CFLAR/SPP1	2
GO:0045124	regulation of bone resorption	0.0289855	41/18800	0.00992625	0.0220681	0.00881829	SPP1/IL6	2
GO:1905521	regulation of macrophage migration	0.0289855	41/18800	0.00992625	0.0220681	0.00881829	MAPK1/MAPK3	2
GO:2000008	regulation of protein localization to cell surface	0.0289855	41/18800	0.00992625	0.0220681	0.00881829	CTNNB1/NEDD4L	2
GO:0071356	cellular response to tumor necrosis factor	0.057971	229/18800	0.00999638	0.0222052	0.00887309	MAPK1/NFKBIA/NFKB1/MAPK3	4
GO:0048675	axon extension	0.0434783	121/18800	0.0100083	0.0222052	0.00887309	VCL/GSK3B/VEGFA	3
GO:0051209	release of sequestered calcium ion into cytosol	0.0434783	121/18800	0.0100083	0.0222052	0.00887309	TRPA1/BAX/PRKCE	3
GO:0009913	epidermal cell differentiation	0.057971	230/18800	0.0101457	0.0224797	0.00898276	BMP4/IL1A/CASP3/CTNNB1	4
GO:0042445	hormone metabolic process	0.057971	230/18800	0.0101457	0.0224797	0.00898276	NFKB1/STAT5B/SPP1/HIF1A	4
GO:0010811	positive regulation of cell-substrate adhesion	0.0434783	122/18800	0.010234	0.0226447	0.00904872	PRKCE/GSK3B/VEGFA	3
GO:0051283	negative regulation of sequestering of calcium ion	0.0434783	122/18800	0.010234	0.0226447	0.00904872	TRPA1/BAX/PRKCE	3
GO:0045088	regulation of innate immune response	0.057971	231/18800	0.0102964	0.0227675	0.00909778	LBP/STAT5B/HMGB1/TBK1	4
GO:0002347	response to tumor cell	0.0289855	42/18800	0.010398	0.0228534	0.0091321	AHR/HMGB1	2
GO:0008542	visual learning	0.0289855	42/18800	0.010398	0.0228534	0.0091321	HMGCR/HIF1A	2
GO:0010907	positive regulation of glucose metabolic process	0.0289855	42/18800	0.010398	0.0228534	0.0091321	INSR/PPARA	2
GO:0030501	positive regulation of bone mineralization	0.0289855	42/18800	0.010398	0.0228534	0.0091321	TGFB1/BMP4	2
GO:0030890	positive regulation of B cell proliferation	0.0289855	42/18800	0.010398	0.0228534	0.0091321	BCL2/CDKN1A	2
GO:0032467	positive regulation of cytokinesis	0.0289855	42/18800	0.010398	0.0228534	0.0091321	CDC6/PRKCE	2
GO:0032689	negative regulation of interferon-gamma production	0.0289855	42/18800	0.010398	0.0228534	0.0091321	HMGB1/IL10	2
GO:0045022	early endosome to late endosome transport	0.0289855	42/18800	0.010398	0.0228534	0.0091321	MAPK1/MAPK3	2
GO:1904591	positive regulation of protein import	0.0289855	42/18800	0.010398	0.0228534	0.0091321	TGFB1/PRKCD	2
GO:0002244	hematopoietic progenitor cell differentiation	0.0434783	123/18800	0.0104627	0.022934	0.0091643	TGFB1/BMP4/BCL2	3
GO:0010906	regulation of glucose metabolic process	0.0434783	123/18800	0.0104627	0.022934	0.0091643	INSR/GSK3B/PPARA	3
GO:0031570	DNA integrity checkpoint signaling	0.0434783	123/18800	0.0104627	0.022934	0.0091643	CDC6/CDK2/CDKN1A	3
GO:1901989	positive regulation of cell cycle phase transition	0.0434783	123/18800	0.0104627	0.022934	0.0091643	CDC6/RB1/EGFR	3
GO:0046683	response to organophosphorus	0.0434783	124/18800	0.0106943	0.0234104	0.00935469	PLAT/AHR/FOS	3
GO:0051282	regulation of sequestering of calcium ion	0.0434783	124/18800	0.0106943	0.0234104	0.00935469	TRPA1/BAX/PRKCE	3
GO:0006775	fat-soluble vitamin metabolic process	0.0289855	43/18800	0.0108796	0.0237525	0.0094914	NFKB1/PPARD	2
GO:0042554	superoxide anion generation	0.0289855	43/18800	0.0108796	0.0237525	0.0094914	TGFB1/PRKCD	2
GO:0042771	intrinsic apoptotic signaling pathway in response to DNA damage by p53 class mediator	0.0289855	43/18800	0.0108796	0.0237525	0.0094914	BCL2/CDKN1A	2
GO:0140353	lipid export from cell	0.0289855	43/18800	0.0108796	0.0237525	0.0094914	IL1A/SPP1	2
GO:0003206	cardiac chamber morphogenesis	0.0434783	126/18800	0.0111666	0.0243465	0.00972875	TGFB1/BMP4/HIF1A	3
GO:0003231	cardiac ventricle development	0.0434783	126/18800	0.0111666	0.0243465	0.00972875	TGFB1/BMP4/HIF1A	3
GO:0045444	fat cell differentiation	0.057971	237/18800	0.0112315	0.0244718	0.00977883	TGFB1/UCP1/PPARD/IL6	4
GO:0006509	membrane protein ectodomain proteolysis	0.0289855	44/18800	0.0113709	0.0246935	0.0098674	TIMP1/IL10	2
GO:0010799	regulation of peptidyl-threonine phosphorylation	0.0289855	44/18800	0.0113709	0.0246935	0.0098674	MAPK1/TGFB1	2
GO:0021795	cerebral cortex cell migration	0.0289855	44/18800	0.0113709	0.0246935	0.0098674	EGFR/CTNNB1	2
GO:0060443	mammary gland morphogenesis	0.0289855	44/18800	0.0113709	0.0246935	0.0098674	BMP4/BAX	2
GO:0062208	positive regulation of pattern recognition receptor signaling pathway	0.0289855	44/18800	0.0113709	0.0246935	0.0098674	LBP/HMGB1	2
GO:0051208	sequestering of calcium ion	0.0434783	128/18800	0.0116507	0.0252675	0.0100968	TRPA1/BAX/PRKCE	3
GO:0071621	granulocyte chemotaxis	0.0434783	128/18800	0.0116507	0.0252675	0.0100968	MAPK1/LBP/MAPK3	3
GO:0032620	interleukin-17 production	0.0289855	45/18800	0.0118718	0.0256116	0.0102343	TGFB1/IL6	2
GO:0032660	regulation of interleukin-17 production	0.0289855	45/18800	0.0118718	0.0256116	0.0102343	TGFB1/IL6	2
GO:0042088	T-helper 1 type immune response	0.0289855	45/18800	0.0118718	0.0256116	0.0102343	RELB/HMGB1	2
GO:0042551	neuron maturation	0.0289855	45/18800	0.0118718	0.0256116	0.0102343	RB1/BCL2	2
GO:0046427	positive regulation of receptor signaling pathway via JAK-STAT	0.0289855	45/18800	0.0118718	0.0256116	0.0102343	IL6/IL10	2
GO:0098927	vesicle-mediated transport between endosomal compartments	0.0289855	45/18800	0.0118718	0.0256116	0.0102343	MAPK1/MAPK3	2
GO:1902622	regulation of neutrophil migration	0.0289855	45/18800	0.0118718	0.0256116	0.0102343	LBP/IL1A	2
GO:2000273	positive regulation of signaling receptor activity	0.0289855	45/18800	0.0118718	0.0256116	0.0102343	IL10/HIF1A	2
GO:2001022	positive regulation of response to DNA damage stimulus	0.0434783	129/18800	0.0118972	0.0256495	0.0102494	EGFR/HMGB1/PRKCD	3
GO:0007093	mitotic cell cycle checkpoint signaling	0.0434783	130/18800	0.0121468	0.0261359	0.0104438	CDC6/CDK2/CDKN1A	3
GO:0030168	platelet activation	0.0434783	130/18800	0.0121468	0.0261359	0.0104438	VCL/IL6/PRKCD	3
GO:0035303	regulation of dephosphorylation	0.0434783	130/18800	0.0121468	0.0261359	0.0104438	TGFB1/GSK3B/PRKCD	3
GO:0016485	protein processing	0.057971	243/18800	0.0122198	0.0262758	0.0104997	PLAT/SERPINE1/CASP3/CASP9	4
GO:0001974	blood vessel remodeling	0.0289855	46/18800	0.0123823	0.0264862	0.0105837	TGFB1/BAX	2
GO:0005978	glycogen biosynthetic process	0.0289855	46/18800	0.0123823	0.0264862	0.0105837	INSR/GSK3B	2
GO:0009250	glucan biosynthetic process	0.0289855	46/18800	0.0123823	0.0264862	0.0105837	INSR/GSK3B	2
GO:0035307	positive regulation of protein dephosphorylation	0.0289855	46/18800	0.0123823	0.0264862	0.0105837	TGFB1/PRKCD	2
GO:0035987	endodermal cell differentiation	0.0289855	46/18800	0.0123823	0.0264862	0.0105837	CTNNB1/MMP9	2
GO:0046677	response to antibiotic	0.0289855	46/18800	0.0123823	0.0264862	0.0105837	CASP3/CASP9	2
GO:0048806	genitalia development	0.0289855	46/18800	0.0123823	0.0264862	0.0105837	BAX/CTNNB1	2
GO:1904707	positive regulation of vascular associated smooth muscle cell proliferation	0.0289855	46/18800	0.0123823	0.0264862	0.0105837	MMP9/IL10	2
GO:0006275	regulation of DNA replication	0.0434783	131/18800	0.0123993	0.0264879	0.0105845	CDC6/CDK2/EGFR	3
GO:0050853	B cell receptor signaling pathway	0.0434783	131/18800	0.0123993	0.0264879	0.0105845	MAPK1/BAX/BCL2	3
GO:1903039	positive regulation of leukocyte cell-cell adhesion	0.057971	245/18800	0.0125613	0.0268165	0.0107158	IL1A/STAT5B/HMGB1/IL6	4
GO:0007498	mesoderm development	0.0434783	132/18800	0.0126549	0.0269811	0.0107815	BMP4/VEGFA/SMAD1	3
GO:0010565	regulation of cellular ketone metabolic process	0.0434783	132/18800	0.0126549	0.0269811	0.0107815	PRKCE/PPARD/PPARA	3
GO:0003254	regulation of membrane depolarization	0.0289855	47/18800	0.0129022	0.0274016	0.0109495	BCL2/NEDD4L	2
GO:0048066	developmental pigmentation	0.0289855	47/18800	0.0129022	0.0274016	0.0109495	BAX/BCL2	2
GO:0060711	labyrinthine layer development	0.0289855	47/18800	0.0129022	0.0274016	0.0109495	MAPK1/IL10	2
GO:0097028	dendritic cell differentiation	0.0289855	47/18800	0.0129022	0.0274016	0.0109495	RELB/HMGB1	2
GO:0101023	vascular endothelial cell proliferation	0.0289855	47/18800	0.0129022	0.0274016	0.0109495	STAT3/HMGB1	2
GO:1905562	regulation of vascular endothelial cell proliferation	0.0289855	47/18800	0.0129022	0.0274016	0.0109495	STAT3/HMGB1	2
GO:1903844	regulation of cellular response to transforming growth factor beta stimulus	0.0434783	133/18800	0.0129134	0.0274076	0.0109519	TGFB1/CFLAR/PPARA	3
GO:0014074	response to purine-containing compound	0.0434783	134/18800	0.013175	0.0279447	0.0111666	PLAT/AHR/FOS	3
GO:0007632	visual behavior	0.0289855	48/18800	0.0134316	0.0283226	0.0113176	HMGCR/HIF1A	2
GO:0010543	regulation of platelet activation	0.0289855	48/18800	0.0134316	0.0283226	0.0113176	IL6/PRKCD	2
GO:0010761	fibroblast migration	0.0289855	48/18800	0.0134316	0.0283226	0.0113176	TGFB1/PRKCE	2
GO:0031641	regulation of myelination	0.0289855	48/18800	0.0134316	0.0283226	0.0113176	HGF/CTNNB1	2
GO:0043114	regulation of vascular permeability	0.0289855	48/18800	0.0134316	0.0283226	0.0113176	TGFB1/VEGFA	2
GO:0044818	mitotic G2/M transition checkpoint	0.0289855	48/18800	0.0134316	0.0283226	0.0113176	CDC6/CDKN1A	2
GO:0060324	face development	0.0289855	48/18800	0.0134316	0.0283226	0.0113176	MAPK1/MAPK3	2
GO:0060976	coronary vasculature development	0.0289855	48/18800	0.0134316	0.0283226	0.0113176	BMP4/VEGFA	2
GO:1902003	regulation of amyloid-beta formation	0.0289855	48/18800	0.0134316	0.0283226	0.0113176	NTRK2/CASP3	2
GO:0043401	steroid hormone mediated signaling pathway	0.0434783	135/18800	0.0134396	0.0283226	0.0113176	BMP4/PPARD/PPARA	3
GO:0051924	regulation of calcium ion transport	0.057971	251/18800	0.0136222	0.028689	0.011464	BAX/PRKCE/CTNNB1/BCL2	4
GO:0009581	detection of external stimulus	0.0434783	136/18800	0.0137073	0.0288495	0.0115281	NGFR/TRPA1/CTNNB1	3
GO:0008038	neuron recognition	0.0289855	49/18800	0.0139703	0.0292341	0.0116818	CASP3/YWHAZ	2
GO:0010656	negative regulation of muscle cell apoptotic process	0.0289855	49/18800	0.0139703	0.0292341	0.0116818	HMOX1/CFLAR	2
GO:0010862	positive regulation of pathway-restricted SMAD protein phosphorylation	0.0289855	49/18800	0.0139703	0.0292341	0.0116818	TGFB1/BMP4	2
GO:0022602	ovulation cycle process	0.0289855	49/18800	0.0139703	0.0292341	0.0116818	STAT5B/CASP3	2
GO:0030850	prostate gland development	0.0289855	49/18800	0.0139703	0.0292341	0.0116818	BMP4/CTNNB1	2
GO:0042461	photoreceptor cell development	0.0289855	49/18800	0.0139703	0.0292341	0.0116818	NTRK2/VEGFA	2
GO:0046850	regulation of bone remodeling	0.0289855	49/18800	0.0139703	0.0292341	0.0116818	SPP1/IL6	2
GO:0060260	regulation of transcription initiation from RNA polymerase II promoter	0.0289855	49/18800	0.0139703	0.0292341	0.0116818	ERCC1/HMGB1	2
GO:0097300	programmed necrotic cell death	0.0289855	49/18800	0.0139703	0.0292341	0.0116818	BAX/CFLAR	2
GO:0002705	positive regulation of leukocyte mediated immunity	0.0434783	138/18800	0.0142516	0.0297848	0.0119019	TGFB1/STAT5B/IL6	3
GO:0031644	regulation of nervous system process	0.0434783	138/18800	0.0142516	0.0297848	0.0119019	HGF/IL1A/IL10	3
GO:0038084	vascular endothelial growth factor signaling pathway	0.0289855	50/18800	0.0145182	0.030286	0.0121021	PGF/VEGFA	2
GO:2000107	negative regulation of leukocyte apoptotic process	0.0289855	50/18800	0.0145182	0.030286	0.0121021	BMP4/HIF1A	2
GO:0009582	detection of abiotic stimulus	0.0434783	139/18800	0.0145284	0.030286	0.0121021	NGFR/TRPA1/CTNNB1	3
GO:0009799	specification of symmetry	0.0434783	139/18800	0.0145284	0.030286	0.0121021	BMP4/CTNNB1/HIF1A	3
GO:0000086	G2/M transition of mitotic cell cycle	0.0434783	140/18800	0.0148082	0.03083	0.0123195	CDC6/CDK2/CDKN1A	3
GO:0050768	negative regulation of neurogenesis	0.0434783	140/18800	0.0148082	0.03083	0.0123195	CTNNB1/SPP1/IL6	3
GO:0010823	negative regulation of mitochondrion organization	0.0289855	51/18800	0.0150754	0.0312798	0.0124993	HGF/BCL2L1	2
GO:0032330	regulation of chondrocyte differentiation	0.0289855	51/18800	0.0150754	0.0312798	0.0124993	BMP4/CTNNB1	2
GO:0045778	positive regulation of ossification	0.0289855	51/18800	0.0150754	0.0312798	0.0124993	TGFB1/BMP4	2
GO:0050982	detection of mechanical stimulus	0.0289855	51/18800	0.0150754	0.0312798	0.0124993	TRPA1/CTNNB1	2
GO:0034763	negative regulation of transmembrane transport	0.0434783	141/18800	0.0150911	0.0312798	0.0124993	PRKCE/MMP9/NEDD4L	3
GO:0038061	NIK/NF-kappaB signaling	0.0434783	141/18800	0.0150911	0.0312798	0.0124993	NFKBIA/RELB/EGFR	3
GO:0046328	regulation of JNK cascade	0.0434783	141/18800	0.0150911	0.0312798	0.0124993	IL1A/EGFR/HMGB1	3
GO:0090150	establishment of protein localization to membrane	0.057971	259/18800	0.0151235	0.0313272	0.0125182	ERBB2/EGFR/BAX/BBC3	4
GO:0032147	activation of protein kinase activity	0.0434783	142/18800	0.015377	0.0317719	0.0126959	INSR/VEGFA/PRKCD	3
GO:0035107	appendage morphogenesis	0.0434783	142/18800	0.015377	0.0317719	0.0126959	BMP4/BAX/CTNNB1	3
GO:0035108	limb morphogenesis	0.0434783	142/18800	0.015377	0.0317719	0.0126959	BMP4/BAX/CTNNB1	3
GO:0045598	regulation of fat cell differentiation	0.0434783	142/18800	0.015377	0.0317719	0.0126959	TGFB1/PPARD/IL6	3
GO:0031103	axon regeneration	0.0289855	52/18800	0.0156416	0.0322374	0.0128819	SPP1/BCL2	2
GO:0038093	Fc receptor signaling pathway	0.0289855	52/18800	0.0156416	0.0322374	0.0128819	PRKCE/PRKCD	2
GO:0043392	negative regulation of DNA binding	0.0289855	52/18800	0.0156416	0.0322374	0.0128819	HMOX1/NFKBIA	2
GO:0070169	positive regulation of biomineral tissue development	0.0289855	52/18800	0.0156416	0.0322374	0.0128819	TGFB1/BMP4	2
GO:0061351	neural precursor cell proliferation	0.0434783	143/18800	0.0156659	0.032247	0.0128858	CTNNB1/HIF1A/VEGFA	3
GO:1903531	negative regulation of secretion by cell	0.0434783	143/18800	0.0156659	0.032247	0.0128858	HMOX1/HMGCR/UCP2	3
GO:0010959	regulation of metal ion transport	0.0724638	403/18800	0.0161815	0.0332874	0.0133015	BAX/PRKCE/CTNNB1/BCL2/NEDD4L	5
GO:0002931	response to ischemia	0.0289855	53/18800	0.0162169	0.0332974	0.0133055	CASP9/BCL2	2
GO:0110151	positive regulation of biomineralization	0.0289855	53/18800	0.0162169	0.0332974	0.0133055	TGFB1/BMP4	2
GO:1900087	positive regulation of G1/S transition of mitotic cell cycle	0.0289855	53/18800	0.0162169	0.0332974	0.0133055	CDC6/EGFR	2
GO:0031333	negative regulation of protein-containing complex assembly	0.0434783	145/18800	0.0162531	0.03333	0.0133185	GSK3B/HMGB1/PRKCD	3
GO:0051961	negative regulation of nervous system development	0.0434783	145/18800	0.0162531	0.03333	0.0133185	CTNNB1/SPP1/IL6	3
GO:0046718	viral entry into host cell	0.0434783	146/18800	0.0165512	0.0339202	0.0135543	ICAM1/EGFR/INSR	3
GO:0090092	regulation of transmembrane receptor protein serine/threonine kinase signaling pathway	0.057971	267/18800	0.0167257	0.0342564	0.0136887	CHRD/TGFB1/BMP4/PPARA	4
GO:0002067	glandular epithelial cell differentiation	0.0289855	54/18800	0.0168011	0.0343678	0.0137332	BMP4/GSK3B	2
GO:0048599	oocyte development	0.0289855	54/18800	0.0168011	0.0343678	0.0137332	CTNNB1/BCL2	2
GO:0051053	negative regulation of DNA metabolic process	0.0434783	148/18800	0.0171568	0.0350734	0.0140152	ERCC1/CDC6/CDKN1A	3
GO:0001706	endoderm formation	0.0289855	55/18800	0.0173943	0.0354484	0.014165	CTNNB1/MMP9	2
GO:0001954	positive regulation of cell-matrix adhesion	0.0289855	55/18800	0.0173943	0.0354484	0.014165	GSK3B/VEGFA	2
GO:0048008	platelet-derived growth factor receptor signaling pathway	0.0289855	55/18800	0.0173943	0.0354484	0.014165	PLAT/VEGFA	2
GO:1902991	regulation of amyloid precursor protein catabolic process	0.0289855	55/18800	0.0173943	0.0354484	0.014165	NTRK2/CASP3	2
GO:1905517	macrophage migration	0.0289855	55/18800	0.0173943	0.0354484	0.014165	MAPK1/MAPK3	2
GO:0060041	retina development in camera-type eye	0.0434783	149/18800	0.0174642	0.0355687	0.0142131	NTRK2/BAX/HIF1A	3
GO:0010976	positive regulation of neuron projection development	0.0434783	150/18800	0.0177746	0.0361561	0.0144478	HGF/NTRK2/CFLAR	3
GO:0030902	hindbrain development	0.0434783	150/18800	0.0177746	0.0361561	0.0144478	CTNNB1/BCL2/SMAD1	3
GO:0043161	proteasome-mediated ubiquitin-dependent protein catabolic process	0.0724638	414/18800	0.0179671	0.0365162	0.0145917	TBL1X/CDK2/GSK3B/CTNNB1/NEDD4L	5
GO:0022898	regulation of transmembrane transporter activity	0.057971	273/18800	0.0179949	0.0365162	0.0145917	PRKCE/MMP9/BCL2/NEDD4L	4
GO:0034205	amyloid-beta formation	0.0289855	56/18800	0.0179962	0.0365162	0.0145917	NTRK2/CASP3	2
GO:0055078	sodium ion homeostasis	0.0289855	56/18800	0.0179962	0.0365162	0.0145917	IL1A/NEDD4L	2
GO:0001961	positive regulation of cytokine-mediated signaling pathway	0.0289855	57/18800	0.018607	0.0375693	0.0150125	HIF1A/TBK1	2
GO:0006754	ATP biosynthetic process	0.0289855	57/18800	0.018607	0.0375693	0.0150125	TGFB1/PPARA	2
GO:0009948	anterior/posterior axis specification	0.0289855	57/18800	0.018607	0.0375693	0.0150125	BMP4/CTNNB1	2
GO:0032608	interferon-beta production	0.0289855	57/18800	0.018607	0.0375693	0.0150125	RELB/TBK1	2
GO:0032648	regulation of interferon-beta production	0.0289855	57/18800	0.018607	0.0375693	0.0150125	RELB/TBK1	2
GO:0051289	protein homotetramerization	0.0289855	57/18800	0.018607	0.0375693	0.0150125	TRPA1/CRTC2	2
GO:0060350	endochondral bone morphogenesis	0.0289855	57/18800	0.018607	0.0375693	0.0150125	BMP4/MMP13	2
GO:2000142	regulation of DNA-templated transcription, initiation	0.0289855	57/18800	0.018607	0.0375693	0.0150125	ERCC1/HMGB1	2
GO:0044409	entry into host	0.0434783	153/18800	0.0187245	0.0377834	0.0150981	ICAM1/EGFR/INSR	3
GO:0034329	cell junction assembly	0.0724638	420/18800	0.0189942	0.038304	0.0153061	VCL/NTRK2/CTNNB1/BCL2/VEGFA	5
GO:0097553	calcium ion transmembrane import into cytosol	0.0434783	154/18800	0.0190473	0.0383875	0.0153395	TRPA1/BAX/PRKCE	3
GO:0002090	regulation of receptor internalization	0.0289855	58/18800	0.0192264	0.0385586	0.0154078	INSR/VEGFA	2
GO:0006611	protein export from nucleus	0.0289855	58/18800	0.0192264	0.0385586	0.0154078	TGFB1/GSK3B	2
GO:0009994	oocyte differentiation	0.0289855	58/18800	0.0192264	0.0385586	0.0154078	CTNNB1/BCL2	2
GO:0010559	regulation of glycoprotein biosynthetic process	0.0289855	58/18800	0.0192264	0.0385586	0.0154078	CTNNB1/BCL2	2
GO:0022029	telencephalon cell migration	0.0289855	58/18800	0.0192264	0.0385586	0.0154078	EGFR/CTNNB1	2
GO:0060135	maternal process involved in female pregnancy	0.0289855	58/18800	0.0192264	0.0385586	0.0154078	PPARD/SPP1	2
GO:0090303	positive regulation of wound healing	0.0289855	58/18800	0.0192264	0.0385586	0.0154078	SERPINE1/PRKCE	2
GO:2000649	regulation of sodium ion transmembrane transporter activity	0.0289855	58/18800	0.0192264	0.0385586	0.0154078	PRKCE/NEDD4L	2
GO:0044839	cell cycle G2/M phase transition	0.0434783	155/18800	0.0193732	0.0388294	0.015516	CDC6/CDK2/CDKN1A	3
GO:0006816	calcium ion transport	0.0724638	424/18800	0.0197001	0.0394604	0.0157682	TRPA1/BAX/PRKCE/CTNNB1/BCL2	5
GO:0001755	neural crest cell migration	0.0289855	59/18800	0.0198544	0.0396724	0.0158529	BMP4/HIF1A	2
GO:0002218	activation of innate immune response	0.0289855	59/18800	0.0198544	0.0396724	0.0158529	HMGB1/TBK1	2
GO:0045599	negative regulation of fat cell differentiation	0.0289855	59/18800	0.0198544	0.0396724	0.0158529	TGFB1/IL6	2
GO:2000351	regulation of endothelial cell apoptotic process	0.0289855	59/18800	0.0198544	0.0396724	0.0158529	SERPINE1/ICAM1	2
GO:0072659	protein localization to plasma membrane	0.057971	283/18800	0.0202409	0.0404202	0.0161517	TGFB1/EGFR/BCL2L1/PRKCE	4
GO:0006687	glycosphingolipid metabolic process	0.0289855	60/18800	0.0204909	0.0408448	0.0163214	BAX/PRKCD	2
GO:0030071	regulation of mitotic metaphase/anaphase transition	0.0289855	60/18800	0.0204909	0.0408448	0.0163214	CDC6/RB1	2
GO:1903078	positive regulation of protein localization to plasma membrane	0.0289855	60/18800	0.0204909	0.0408448	0.0163214	EGFR/PRKCE	2
GO:0050804	modulation of chemical synaptic transmission	0.0724638	429/18800	0.0206065	0.0410502	0.0164035	MAPK1/PLAT/NTRK2/PRKCE/GSK3B	5
GO:0099177	regulation of trans-synaptic signaling	0.0724638	430/18800	0.0207911	0.0413927	0.0165403	MAPK1/PLAT/NTRK2/PRKCE/GSK3B	5
GO:0044403	biological process involved in symbiotic interaction	0.057971	286/18800	0.020947	0.0416779	0.0166543	ICAM1/EGFR/BCL2L1/INSR	4
GO:0007030	Golgi organization	0.0434783	160/18800	0.0210491	0.0418555	0.0167253	MAPK1/MAPK3/YWHAZ	3
GO:0021885	forebrain cell migration	0.0289855	61/18800	0.021136	0.0419519	0.0167638	EGFR/CTNNB1	2
GO:0035306	positive regulation of dephosphorylation	0.0289855	61/18800	0.021136	0.0419519	0.0167638	TGFB1/PRKCD	2
GO:0045428	regulation of nitric oxide biosynthetic process	0.0289855	61/18800	0.021136	0.0419519	0.0167638	INSR/IL10	2
GO:0002712	regulation of B cell mediated immunity	0.0289855	62/18800	0.0217894	0.0430663	0.0172091	TGFB1/IL10	2
GO:0002889	regulation of immunoglobulin mediated immune response	0.0289855	62/18800	0.0217894	0.0430663	0.0172091	TGFB1/IL10	2
GO:0007091	metaphase/anaphase transition of mitotic cell cycle	0.0289855	62/18800	0.0217894	0.0430663	0.0172091	CDC6/RB1	2
GO:0010972	negative regulation of G2/M transition of mitotic cell cycle	0.0289855	62/18800	0.0217894	0.0430663	0.0172091	CDC6/CDKN1A	2
GO:0032731	positive regulation of interleukin-1 beta production	0.0289855	62/18800	0.0217894	0.0430663	0.0172091	STAT3/IL6	2
GO:0060393	regulation of pathway-restricted SMAD protein phosphorylation	0.0289855	62/18800	0.0217894	0.0430663	0.0172091	TGFB1/BMP4	2
GO:2000736	regulation of stem cell differentiation	0.0289855	62/18800	0.0217894	0.0430663	0.0172091	STAT3/GSK3B	2
GO:0006470	protein dephosphorylation	0.057971	291/18800	0.0221573	0.0437671	0.0174891	TGFB1/GSK3B/BCL2/PRKCD	4
GO:0006949	syncytium formation	0.0289855	63/18800	0.0224512	0.0441612	0.0176466	ERCC1/CFLAR	2
GO:0007062	sister chromatid cohesion	0.0289855	63/18800	0.0224512	0.0441612	0.0176466	RB1/CTNNB1	2
GO:0032623	interleukin-2 production	0.0289855	63/18800	0.0224512	0.0441612	0.0176466	IL1A/STAT5B	2
GO:0032663	regulation of interleukin-2 production	0.0289855	63/18800	0.0224512	0.0441612	0.0176466	IL1A/STAT5B	2
GO:0051893	regulation of focal adhesion assembly	0.0289855	63/18800	0.0224512	0.0441612	0.0176466	VCL/VEGFA	2
GO:0090109	regulation of cell-substrate junction assembly	0.0289855	63/18800	0.0224512	0.0441612	0.0176466	VCL/VEGFA	2
GO:1902099	regulation of metaphase/anaphase transition of cell cycle	0.0289855	63/18800	0.0224512	0.0441612	0.0176466	CDC6/RB1	2
GO:0014015	positive regulation of gliogenesis	0.0289855	64/18800	0.0231212	0.0452618	0.0180864	TGFB1/IL6	2
GO:0045670	regulation of osteoclast differentiation	0.0289855	64/18800	0.0231212	0.0452618	0.0180864	FOS/CTNNB1	2
GO:0045995	regulation of embryonic development	0.0289855	64/18800	0.0231212	0.0452618	0.0180864	INSR/CTNNB1	2
GO:0048814	regulation of dendrite morphogenesis	0.0289855	64/18800	0.0231212	0.0452618	0.0180864	GSK3B/NEDD4L	2
GO:0060760	positive regulation of response to cytokine stimulus	0.0289855	64/18800	0.0231212	0.0452618	0.0180864	HIF1A/TBK1	2
GO:0080164	regulation of nitric oxide metabolic process	0.0289855	64/18800	0.0231212	0.0452618	0.0180864	INSR/IL10	2
GO:1902750	negative regulation of cell cycle G2/M phase transition	0.0289855	64/18800	0.0231212	0.0452618	0.0180864	CDC6/CDKN1A	2
GO:1903018	regulation of glycoprotein metabolic process	0.0289855	64/18800	0.0231212	0.0452618	0.0180864	CTNNB1/BCL2	2
GO:0001959	regulation of cytokine-mediated signaling pathway	0.0434783	166/18800	0.0231624	0.0453152	0.0181078	IL6/HIF1A/TBK1	3
GO:0003205	cardiac chamber development	0.0434783	167/18800	0.0235254	0.0459706	0.0183697	TGFB1/BMP4/HIF1A	3
GO:0051048	negative regulation of secretion	0.0434783	167/18800	0.0235254	0.0459706	0.0183697	HMOX1/HMGCR/UCP2	3
GO:0010965	regulation of mitotic sister chromatid separation	0.0289855	65/18800	0.0237995	0.0463404	0.0185174	CDC6/RB1	2
GO:0035914	skeletal muscle cell differentiation	0.0289855	65/18800	0.0237995	0.0463404	0.0185174	RB1/FOS	2
GO:0042446	hormone biosynthetic process	0.0289855	65/18800	0.0237995	0.0463404	0.0185174	NFKB1/HIF1A	2
GO:0042490	mechanoreceptor differentiation	0.0289855	65/18800	0.0237995	0.0463404	0.0185174	BMP4/NTRK2	2
GO:0044784	metaphase/anaphase transition of cell cycle	0.0289855	65/18800	0.0237995	0.0463404	0.0185174	CDC6/RB1	2
GO:0045682	regulation of epidermis development	0.0289855	65/18800	0.0237995	0.0463404	0.0185174	BMP4/PPARD	2
GO:0071466	cellular response to xenobiotic stimulus	0.0434783	168/18800	0.0238916	0.046466	0.0185676	AHR/RB1/UGT1A6	3
GO:0000280	nuclear division	0.0724638	446/18800	0.0238924	0.046466	0.0185676	CDC6/BMP4/IL1A/RB1/INSR	5
GO:0006303	double-strand break repair via nonhomologous end joining	0.0289855	66/18800	0.0244859	0.0473953	0.0189389	ERCC1/HMGB1	2
GO:0006879	cellular iron ion homeostasis	0.0289855	66/18800	0.0244859	0.0473953	0.0189389	HMOX1/HIF1A	2
GO:0030104	water homeostasis	0.0289855	66/18800	0.0244859	0.0473953	0.0189389	MET/NEDD4L	2
GO:0050435	amyloid-beta metabolic process	0.0289855	66/18800	0.0244859	0.0473953	0.0189389	NTRK2/CASP3	2
GO:0060389	pathway-restricted SMAD protein phosphorylation	0.0289855	66/18800	0.0244859	0.0473953	0.0189389	TGFB1/BMP4	2
GO:0070265	necrotic cell death	0.0289855	66/18800	0.0244859	0.0473953	0.0189389	BAX/CFLAR	2
GO:0071677	positive regulation of mononuclear cell migration	0.0289855	66/18800	0.0244859	0.0473953	0.0189389	SERPINE1/HMGB1	2
GO:1902808	positive regulation of cell cycle G1/S phase transition	0.0289855	66/18800	0.0244859	0.0473953	0.0189389	CDC6/EGFR	2
GO:0000075	cell cycle checkpoint signaling	0.0434783	170/18800	0.0246332	0.0476241	0.0190304	CDC6/CDK2/CDKN1A	3
GO:0072331	signal transduction by p53 class mediator	0.0434783	170/18800	0.0246332	0.0476241	0.0190304	BAX/BCL2/CDKN1A	3
GO:0002704	negative regulation of leukocyte mediated immunity	0.0289855	67/18800	0.0251803	0.0485674	0.0194073	HMOX1/AHR	2
GO:0033692	cellular polysaccharide biosynthetic process	0.0289855	67/18800	0.0251803	0.0485674	0.0194073	INSR/GSK3B	2
GO:1902305	regulation of sodium ion transmembrane transport	0.0289855	67/18800	0.0251803	0.0485674	0.0194073	PRKCE/NEDD4L	2
GO:1904377	positive regulation of protein localization to cell periphery	0.0289855	67/18800	0.0251803	0.0485674	0.0194073	EGFR/PRKCE	2
GO:0019932	second-messenger-mediated signaling	0.057971	303/18800	0.0252346	0.0486434	0.0194377	AHR/EGFR/GSK3B/VEGFA	4
GO:0009206	purine ribonucleoside triphosphate biosynthetic process	0.0289855	68/18800	0.0258828	0.0497174	0.0198668	TGFB1/PPARA	2
GO:0042987	amyloid precursor protein catabolic process	0.0289855	68/18800	0.0258828	0.0497174	0.0198668	NTRK2/CASP3	2
GO:0050709	negative regulation of protein secretion	0.0289855	68/18800	0.0258828	0.0497174	0.0198668	HMGCR/UCP2	2
GO:0051148	negative regulation of muscle cell differentiation	0.0289855	68/18800	0.0258828	0.0497174	0.0198668	PPARA/SMAD1	2
GO:0051306	mitotic sister chromatid separation	0.0289855	68/18800	0.0258828	0.0497174	0.0198668	CDC6/RB1	2
GO:0150116	regulation of cell-substrate junction organization	0.0289855	68/18800	0.0258828	0.0497174	0.0198668	VCL/VEGFA	2
GO:0006874	cellular calcium ion homeostasis	0.0724638	456/18800	0.0259754	0.0498662	0.0199263	TRPA1/BAX/PRKCE/HMGB1/BCL2	5
GO:0000910	cytokinesis	0.0434783	174/18800	0.0261536	0.0501493	0.0200394	CDC6/BCL2L1/PRKCE	3
GO:0042770	signal transduction in response to DNA damage	0.0434783	174/18800	0.0261536	0.0501493	0.0200394	CDK2/CASP9/CDKN1A	3
GO:0006694	steroid biosynthetic process	0.0434783	175/18800	0.0265414	0.0508632	0.0203247	NFKB1/IL1A/HMGCR	3
GO:0009145	purine nucleoside triphosphate biosynthetic process	0.0289855	69/18800	0.0265932	0.0508732	0.0203287	TGFB1/PPARA	2
GO:0032715	negative regulation of interleukin-6 production	0.0289855	69/18800	0.0265932	0.0508732	0.0203287	HGF/IL10	2
GO:0043550	regulation of lipid kinase activity	0.0289855	69/18800	0.0265932	0.0508732	0.0203287	TGFB1/RB1	2
GO:0031056	regulation of histone modification	0.0434783	176/18800	0.0269323	0.0514619	0.0205639	MAPK3/CTNNB1/VEGFA	3
GO:1902905	positive regulation of supramolecular fiber organization	0.0434783	176/18800	0.0269323	0.0514619	0.0205639	RB1/PRKCE/MET	3
GO:0032890	regulation of organic acid transport	0.0289855	70/18800	0.0273114	0.0519724	0.0207679	IL1A/PPARA	2
GO:0042698	ovulation cycle	0.0289855	70/18800	0.0273114	0.0519724	0.0207679	STAT5B/CASP3	2
GO:0071260	cellular response to mechanical stimulus	0.0289855	70/18800	0.0273114	0.0519724	0.0207679	NFKB1/MAPK3	2
GO:1904888	cranial skeletal system development	0.0289855	70/18800	0.0273114	0.0519724	0.0207679	BMP4/CTNNB1	2
GO:0048736	appendage development	0.0434783	177/18800	0.0273263	0.0519724	0.0207679	BMP4/BAX/CTNNB1	3
GO:0050954	sensory perception of mechanical stimulus	0.0434783	177/18800	0.0273263	0.0519724	0.0207679	TBL1X/TRPA1/CASP3	3
GO:0052126	movement in host environment	0.0434783	177/18800	0.0273263	0.0519724	0.0207679	ICAM1/EGFR/INSR	3
GO:0060173	limb development	0.0434783	177/18800	0.0273263	0.0519724	0.0207679	BMP4/BAX/CTNNB1	3
GO:0007389	pattern specification process	0.0724638	463/18800	0.0275012	0.0522746	0.0208887	CHRD/BMP4/CTNNB1/HIF1A/SMAD1	5
GO:0060759	regulation of response to cytokine stimulus	0.0434783	178/18800	0.0277234	0.0526665	0.0210453	IL6/HIF1A/TBK1	3
GO:0031507	heterochromatin assembly	0.0289855	71/18800	0.0280375	0.0532323	0.0212714	CDK2/RB1	2
GO:0008361	regulation of cell size	0.0434783	179/18800	0.0281236	0.0533032	0.0212997	GSK3B/SPP1/VEGFA	3
GO:0043409	negative regulation of MAPK cascade	0.0434783	179/18800	0.0281236	0.0533032	0.0212997	BMP4/HMGCR/PRKCD	3
GO:0050777	negative regulation of immune response	0.0434783	179/18800	0.0281236	0.0533032	0.0212997	HMOX1/AHR/IL10	3
GO:0051604	protein maturation	0.057971	314/18800	0.0282722	0.0535538	0.0213998	PLAT/SERPINE1/CASP3/CASP9	4
GO:0055074	calcium ion homeostasis	0.0724638	468/18800	0.0286254	0.0541915	0.0216547	TRPA1/BAX/PRKCE/HMGB1/BCL2	5
GO:0003208	cardiac ventricle morphogenesis	0.0289855	72/18800	0.0287713	0.0542795	0.0216898	TGFB1/HIF1A	2
GO:0006801	superoxide metabolic process	0.0289855	72/18800	0.0287713	0.0542795	0.0216898	TGFB1/PRKCD	2
GO:0033045	regulation of sister chromatid segregation	0.0289855	72/18800	0.0287713	0.0542795	0.0216898	CDC6/RB1	2
GO:0050810	regulation of steroid biosynthetic process	0.0289855	72/18800	0.0287713	0.0542795	0.0216898	NFKB1/IL1A	2
GO:1903036	positive regulation of response to wounding	0.0289855	72/18800	0.0287713	0.0542795	0.0216898	SERPINE1/PRKCE	2
GO:1905818	regulation of chromosome separation	0.0289855	72/18800	0.0287713	0.0542795	0.0216898	CDC6/RB1	2
GO:0001707	mesoderm formation	0.0289855	73/18800	0.0295128	0.0555504	0.0221977	BMP4/SMAD1	2
GO:0005977	glycogen metabolic process	0.0289855	73/18800	0.0295128	0.0555504	0.0221977	INSR/GSK3B	2
GO:0033555	multicellular organismal response to stress	0.0289855	73/18800	0.0295128	0.0555504	0.0221977	TRPA1/BCL2	2
GO:0042058	regulation of epidermal growth factor receptor signaling pathway	0.0289855	73/18800	0.0295128	0.0555504	0.0221977	EGFR/MMP9	2
GO:0006073	cellular glucan metabolic process	0.0289855	74/18800	0.0302618	0.0567973	0.0226959	INSR/GSK3B	2
GO:0009201	ribonucleoside triphosphate biosynthetic process	0.0289855	74/18800	0.0302618	0.0567973	0.0226959	TGFB1/PPARA	2
GO:0009880	embryonic pattern specification	0.0289855	74/18800	0.0302618	0.0567973	0.0226959	CTNNB1/SMAD1	2
GO:0035924	cellular response to vascular endothelial growth factor stimulus	0.0289855	74/18800	0.0302618	0.0567973	0.0226959	PGF/VEGFA	2
GO:0044042	glucan metabolic process	0.0289855	74/18800	0.0302618	0.0567973	0.0226959	INSR/GSK3B	2
GO:0001906	cell killing	0.0434783	185/18800	0.0305896	0.0573796	0.0229286	ICAM1/STAT5B/BCL2L1	3
GO:0002437	inflammatory response to antigenic stimulus	0.0289855	75/18800	0.0310185	0.058018	0.0231837	HMGB1/IL10	2
GO:0006809	nitric oxide biosynthetic process	0.0289855	75/18800	0.0310185	0.058018	0.0231837	INSR/IL10	2
GO:0021536	diencephalon development	0.0289855	75/18800	0.0310185	0.058018	0.0231837	BMP4/BAX	2
GO:0048332	mesoderm morphogenesis	0.0289855	75/18800	0.0310185	0.058018	0.0231837	BMP4/SMAD1	2
GO:0071479	cellular response to ionizing radiation	0.0289855	75/18800	0.0310185	0.058018	0.0231837	BCL2L1/CDKN1A	2
GO:0006310	DNA recombination	0.057971	324/18800	0.0312158	0.0583539	0.0233179	ERCC1/TGFB1/HMGB1/IL10	4
GO:0006024	glycosaminoglycan biosynthetic process	0.0289855	76/18800	0.0317826	0.059278	0.0236872	TGFB1/NFKB1	2
GO:0006635	fatty acid beta-oxidation	0.0289855	76/18800	0.0317826	0.059278	0.0236872	PPARD/PPARA	2
GO:0034121	regulation of toll-like receptor signaling pathway	0.0289855	76/18800	0.0317826	0.059278	0.0236872	LBP/HMGB1	2
GO:0061912	selective autophagy	0.0289855	76/18800	0.0317826	0.059278	0.0236872	MAPK3/TBK1	2
GO:0032720	negative regulation of tumor necrosis factor production	0.0289855	77/18800	0.0325541	0.060648	0.0242346	LBP/IL10	2
GO:0050772	positive regulation of axonogenesis	0.0289855	77/18800	0.0325541	0.060648	0.0242346	NTRK2/VEGFA	2
GO:0009755	hormone-mediated signaling pathway	0.0434783	190/18800	0.0327292	0.0609395	0.0243511	BMP4/PPARD/PPARA	3
GO:0007422	peripheral nervous system development	0.0289855	78/18800	0.033333	0.061923	0.0247441	ERBB2/NTRK2	2
GO:0042440	pigment metabolic process	0.0289855	78/18800	0.033333	0.061923	0.0247441	HMOX1/BCL2	2
GO:0043537	negative regulation of blood vessel endothelial cell migration	0.0289855	78/18800	0.033333	0.061923	0.0247441	TGFB1/HMGB1	2
GO:0090049	regulation of cell migration involved in sprouting angiogenesis	0.0289855	78/18800	0.033333	0.061923	0.0247441	HMOX1/VEGFA	2
GO:0045664	regulation of neuron differentiation	0.0434783	192/18800	0.0336064	0.0623957	0.024933	BMP4/GSK3B/BCL2	3
GO:0006094	gluconeogenesis	0.0289855	79/18800	0.0341191	0.0631329	0.0252276	CRTC2/PPARA	2
GO:0034637	cellular carbohydrate biosynthetic process	0.0289855	79/18800	0.0341191	0.0631329	0.0252276	INSR/GSK3B	2
GO:0048844	artery morphogenesis	0.0289855	79/18800	0.0341191	0.0631329	0.0252276	BMP4/VEGFA	2
GO:0070828	heterochromatin organization	0.0289855	79/18800	0.0341191	0.0631329	0.0252276	CDK2/RB1	2
GO:1901184	regulation of ERBB signaling pathway	0.0289855	79/18800	0.0341191	0.0631329	0.0252276	EGFR/MMP9	2
GO:1903556	negative regulation of tumor necrosis factor superfamily cytokine production	0.0289855	79/18800	0.0341191	0.0631329	0.0252276	LBP/IL10	2
GO:0048285	organelle fission	0.0724638	493/18800	0.034685	0.0641437	0.0256315	CDC6/BMP4/IL1A/RB1/INSR	5
GO:0006023	aminoglycan biosynthetic process	0.0289855	80/18800	0.0349125	0.0642768	0.0256847	TGFB1/NFKB1	2
GO:0006029	proteoglycan metabolic process	0.0289855	80/18800	0.0349125	0.0642768	0.0256847	PPARD/CTNNB1	2
GO:0006367	transcription initiation from RNA polymerase II promoter	0.0289855	80/18800	0.0349125	0.0642768	0.0256847	ERCC1/HMGB1	2
GO:0021766	hippocampus development	0.0289855	80/18800	0.0349125	0.0642768	0.0256847	CASP3/GSK3B	2
GO:0045814	negative regulation of gene expression, epigenetic	0.0289855	80/18800	0.0349125	0.0642768	0.0256847	CDK2/RB1	2
GO:0051279	regulation of release of sequestered calcium ion into cytosol	0.0289855	80/18800	0.0349125	0.0642768	0.0256847	BAX/PRKCE	2
GO:0072503	cellular divalent inorganic cation homeostasis	0.0724638	494/18800	0.0349428	0.0642768	0.0256847	TRPA1/BAX/PRKCE/HMGB1/BCL2	5
GO:1901361	organic cyclic compound catabolic process	0.0724638	494/18800	0.0349428	0.0642768	0.0256847	HMOX1/BAX/SPP1/IL6/PRKCD	5
GO:0120032	regulation of plasma membrane bounded cell projection assembly	0.0434783	195/18800	0.0349453	0.0642768	0.0256847	ICAM1/GSK3B/PRKCD	3
GO:1990778	protein localization to cell periphery	0.057971	337/18800	0.0353045	0.0642768	0.0256847	TGFB1/EGFR/BCL2L1/PRKCE	4
GO:0009566	fertilization	0.0434783	196/18800	0.0353976	0.0642768	0.0256847	PLAT/BAX/BCL2L1	3
GO:0010498	proteasomal protein catabolic process	0.0724638	496/18800	0.0354619	0.0642768	0.0256847	TBL1X/CDK2/GSK3B/CTNNB1/NEDD4L	5
GO:0010660	regulation of muscle cell apoptotic process	0.0289855	81/18800	0.0357131	0.0642768	0.0256847	HMOX1/CFLAR	2
GO:0021675	nerve development	0.0289855	81/18800	0.0357131	0.0642768	0.0256847	NGFR/CTNNB1	2
GO:0044773	mitotic DNA damage checkpoint signaling	0.0289855	81/18800	0.0357131	0.0642768	0.0256847	CDK2/CDKN1A	2
GO:0046209	nitric oxide metabolic process	0.0289855	81/18800	0.0357131	0.0642768	0.0256847	INSR/IL10	2
GO:0060491	regulation of cell projection assembly	0.0434783	197/18800	0.035853	0.0642768	0.0256847	ICAM1/GSK3B/PRKCD	3
GO:0002291	T cell activation via T cell receptor contact with antigen bound to MHC molecule on antigen presenting cell	0.0144928	10/18800	0.0361104	0.0642768	0.0256847	ICAM1	1
GO:0002676	regulation of chronic inflammatory response	0.0144928	10/18800	0.0361104	0.0642768	0.0256847	IL10	1
GO:0003129	heart induction	0.0144928	10/18800	0.0361104	0.0642768	0.0256847	BMP4	1
GO:0003253	cardiac neural crest cell migration involved in outflow tract morphogenesis	0.0144928	10/18800	0.0361104	0.0642768	0.0256847	BMP4	1
GO:0007343	egg activation	0.0144928	10/18800	0.0361104	0.0642768	0.0256847	PLAT	1
GO:0007440	foregut morphogenesis	0.0144928	10/18800	0.0361104	0.0642768	0.0256847	CTNNB1	1
GO:0019062	virion attachment to host cell	0.0144928	10/18800	0.0361104	0.0642768	0.0256847	ICAM1	1
GO:0021548	pons development	0.0144928	10/18800	0.0361104	0.0642768	0.0256847	BCL2	1
GO:0030214	hyaluronan catabolic process	0.0144928	10/18800	0.0361104	0.0642768	0.0256847	TGFB1	1
GO:0031848	protection from non-homologous end joining at telomere	0.0144928	10/18800	0.0361104	0.0642768	0.0256847	ERCC1	1
GO:0032819	positive regulation of natural killer cell proliferation	0.0144928	10/18800	0.0361104	0.0642768	0.0256847	STAT5B	1
GO:0033007	negative regulation of mast cell activation involved in immune response	0.0144928	10/18800	0.0361104	0.0642768	0.0256847	HMOX1	1
GO:0033314	mitotic DNA replication checkpoint signaling	0.0144928	10/18800	0.0361104	0.0642768	0.0256847	CDC6	1
GO:0033483	gas homeostasis	0.0144928	10/18800	0.0361104	0.0642768	0.0256847	HIF1A	1
GO:0033504	floor plate development	0.0144928	10/18800	0.0361104	0.0642768	0.0256847	CHRD	1
GO:0034085	establishment of sister chromatid cohesion	0.0144928	10/18800	0.0361104	0.0642768	0.0256847	RB1	1
GO:0035907	dorsal aorta development	0.0144928	10/18800	0.0361104	0.0642768	0.0256847	NGFR	1
GO:0042368	vitamin D biosynthetic process	0.0144928	10/18800	0.0361104	0.0642768	0.0256847	NFKB1	1
GO:0043587	tongue morphogenesis	0.0144928	10/18800	0.0361104	0.0642768	0.0256847	CTNNB1	1
GO:0043653	mitochondrial fragmentation involved in apoptotic process	0.0144928	10/18800	0.0361104	0.0642768	0.0256847	BAX	1
GO:0045348	positive regulation of MHC class II biosynthetic process	0.0144928	10/18800	0.0361104	0.0642768	0.0256847	IL10	1
GO:0048263	determination of dorsal identity	0.0144928	10/18800	0.0361104	0.0642768	0.0256847	CTNNB1	1
GO:0048563	post-embryonic animal organ morphogenesis	0.0144928	10/18800	0.0361104	0.0642768	0.0256847	BAX	1
GO:0051918	negative regulation of fibrinolysis	0.0144928	10/18800	0.0361104	0.0642768	0.0256847	SERPINE1	1
GO:0060068	vagina development	0.0144928	10/18800	0.0361104	0.0642768	0.0256847	BAX	1
GO:0060742	epithelial cell differentiation involved in prostate gland development	0.0144928	10/18800	0.0361104	0.0642768	0.0256847	CTNNB1	1
GO:0060767	epithelial cell proliferation involved in prostate gland development	0.0144928	10/18800	0.0361104	0.0642768	0.0256847	CTNNB1	1
GO:0060947	cardiac vascular smooth muscle cell differentiation	0.0144928	10/18800	0.0361104	0.0642768	0.0256847	VEGFA	1
GO:0061626	pharyngeal arch artery morphogenesis	0.0144928	10/18800	0.0361104	0.0642768	0.0256847	BMP4	1
GO:0070091	glucagon secretion	0.0144928	10/18800	0.0361104	0.0642768	0.0256847	IL6	1
GO:0070092	regulation of glucagon secretion	0.0144928	10/18800	0.0361104	0.0642768	0.0256847	IL6	1
GO:0070099	regulation of chemokine-mediated signaling pathway	0.0144928	10/18800	0.0361104	0.0642768	0.0256847	HIF1A	1
GO:0070391	response to lipoteichoic acid	0.0144928	10/18800	0.0361104	0.0642768	0.0256847	LBP	1
GO:0070874	negative regulation of glycogen metabolic process	0.0144928	10/18800	0.0361104	0.0642768	0.0256847	GSK3B	1
GO:0071223	cellular response to lipoteichoic acid	0.0144928	10/18800	0.0361104	0.0642768	0.0256847	LBP	1
GO:0090037	positive regulation of protein kinase C signaling	0.0144928	10/18800	0.0361104	0.0642768	0.0256847	VEGFA	1
GO:0090184	positive regulation of kidney development	0.0144928	10/18800	0.0361104	0.0642768	0.0256847	BMP4	1
GO:0097050	type B pancreatic cell apoptotic process	0.0144928	10/18800	0.0361104	0.0642768	0.0256847	IL6	1
GO:1901203	positive regulation of extracellular matrix assembly	0.0144928	10/18800	0.0361104	0.0642768	0.0256847	TGFB1	1
GO:1901725	regulation of histone deacetylase activity	0.0144928	10/18800	0.0361104	0.0642768	0.0256847	VEGFA	1
GO:1901731	positive regulation of platelet aggregation	0.0144928	10/18800	0.0361104	0.0642768	0.0256847	IL6	1
GO:1904338	regulation of dopaminergic neuron differentiation	0.0144928	10/18800	0.0361104	0.0642768	0.0256847	GSK3B	1
GO:1904779	regulation of protein localization to centrosome	0.0144928	10/18800	0.0361104	0.0642768	0.0256847	GSK3B	1
GO:1990535	neuron projection maintenance	0.0144928	10/18800	0.0361104	0.0642768	0.0256847	INSR	1
GO:2000048	negative regulation of cell-cell adhesion mediated by cadherin	0.0144928	10/18800	0.0361104	0.0642768	0.0256847	VEGFA	1
GO:2000288	positive regulation of myoblast proliferation	0.0144928	10/18800	0.0361104	0.0642768	0.0256847	PPARD	1
GO:2000347	positive regulation of hepatocyte proliferation	0.0144928	10/18800	0.0361104	0.0642768	0.0256847	CFLAR	1
GO:2000425	regulation of apoptotic cell clearance	0.0144928	10/18800	0.0361104	0.0642768	0.0256847	HMGB1	1
GO:2000434	regulation of protein neddylation	0.0144928	10/18800	0.0361104	0.0642768	0.0256847	HIF1A	1
GO:2000659	regulation of interleukin-1-mediated signaling pathway	0.0144928	10/18800	0.0361104	0.0642768	0.0256847	IL6	1
GO:2001054	negative regulation of mesenchymal cell apoptotic process	0.0144928	10/18800	0.0361104	0.0642768	0.0256847	HIF1A	1
GO:2001269	positive regulation of cysteine-type endopeptidase activity involved in apoptotic signaling pathway	0.0144928	10/18800	0.0361104	0.0642768	0.0256847	BAX	1
GO:0009205	purine ribonucleoside triphosphate metabolic process	0.0289855	82/18800	0.0365208	0.0648313	0.0259063	TGFB1/PPARA	2
GO:0019319	hexose biosynthetic process	0.0289855	82/18800	0.0365208	0.0648313	0.0259063	CRTC2/PPARA	2
GO:1901983	regulation of protein acetylation	0.0289855	82/18800	0.0365208	0.0648313	0.0259063	MAPK3/GSK3B	2
GO:1905897	regulation of response to endoplasmic reticulum stress	0.0289855	82/18800	0.0365208	0.0648313	0.0259063	BAX/BCL2L1	2
GO:2001057	reactive nitrogen species metabolic process	0.0289855	82/18800	0.0365208	0.0648313	0.0259063	INSR/IL10	2
GO:0032271	regulation of protein polymerization	0.0434783	201/18800	0.037705	0.0668612	0.0267174	PRKCE/MET/PRKCD	3
GO:1901888	regulation of cell junction assembly	0.0434783	201/18800	0.037705	0.0668612	0.0267174	VCL/NTRK2/VEGFA	3
GO:0035050	embryonic heart tube development	0.0289855	84/18800	0.0381572	0.0675898	0.0270085	CTNNB1/HIF1A	2
GO:0051899	membrane depolarization	0.0289855	84/18800	0.0381572	0.0675898	0.0270085	BCL2/NEDD4L	2
GO:0001910	regulation of leukocyte mediated cytotoxicity	0.0289855	85/18800	0.0389858	0.0682779	0.0272835	ICAM1/STAT5B	2
GO:0008543	fibroblast growth factor receptor signaling pathway	0.0289855	85/18800	0.0389858	0.0682779	0.0272835	NGFR/CTNNB1	2
GO:0009142	nucleoside triphosphate biosynthetic process	0.0289855	85/18800	0.0389858	0.0682779	0.0272835	TGFB1/PPARA	2
GO:0010657	muscle cell apoptotic process	0.0289855	85/18800	0.0389858	0.0682779	0.0272835	HMOX1/CFLAR	2
GO:0055072	iron ion homeostasis	0.0289855	85/18800	0.0389858	0.0682779	0.0272835	HMOX1/HIF1A	2
GO:0000819	sister chromatid segregation	0.0434783	205/18800	0.0396054	0.0682779	0.0272835	CDC6/RB1/CTNNB1	3
GO:0001660	fever generation	0.0144928	11/18800	0.0396499	0.0682779	0.0272835	IL1A	1
GO:0001886	endothelial cell morphogenesis	0.0144928	11/18800	0.0396499	0.0682779	0.0272835	MET	1
GO:0003139	secondary heart field specification	0.0144928	11/18800	0.0396499	0.0682779	0.0272835	BMP4	1
GO:0003163	sinoatrial node development	0.0144928	11/18800	0.0396499	0.0682779	0.0272835	BMP4	1
GO:0003263	cardioblast proliferation	0.0144928	11/18800	0.0396499	0.0682779	0.0272835	CTNNB1	1
GO:0003264	regulation of cardioblast proliferation	0.0144928	11/18800	0.0396499	0.0682779	0.0272835	CTNNB1	1
GO:0010917	negative regulation of mitochondrial membrane potential	0.0144928	11/18800	0.0396499	0.0682779	0.0272835	BAX	1
GO:0014889	muscle atrophy	0.0144928	11/18800	0.0396499	0.0682779	0.0272835	CFLAR	1
GO:0031293	membrane protein intracellular domain proteolysis	0.0144928	11/18800	0.0396499	0.0682779	0.0272835	TGFB1	1
GO:0032000	positive regulation of fatty acid beta-oxidation	0.0144928	11/18800	0.0396499	0.0682779	0.0272835	PPARA	1
GO:0032096	negative regulation of response to food	0.0144928	11/18800	0.0396499	0.0682779	0.0272835	PPARA	1
GO:0032099	negative regulation of appetite	0.0144928	11/18800	0.0396499	0.0682779	0.0272835	PPARA	1
GO:0032105	negative regulation of response to extracellular stimulus	0.0144928	11/18800	0.0396499	0.0682779	0.0272835	PPARA	1
GO:0032108	negative regulation of response to nutrient levels	0.0144928	11/18800	0.0396499	0.0682779	0.0272835	PPARA	1
GO:0032351	negative regulation of hormone metabolic process	0.0144928	11/18800	0.0396499	0.0682779	0.0272835	NFKB1	1
GO:0033210	leptin-mediated signaling pathway	0.0144928	11/18800	0.0396499	0.0682779	0.0272835	STAT3	1
GO:0033234	negative regulation of protein sumoylation	0.0144928	11/18800	0.0396499	0.0682779	0.0272835	CTNNB1	1
GO:0034115	negative regulation of heterotypic cell-cell adhesion	0.0144928	11/18800	0.0396499	0.0682779	0.0272835	IL10	1
GO:0034145	positive regulation of toll-like receptor 4 signaling pathway	0.0144928	11/18800	0.0396499	0.0682779	0.0272835	LBP	1
GO:0034163	regulation of toll-like receptor 9 signaling pathway	0.0144928	11/18800	0.0396499	0.0682779	0.0272835	HMGB1	1
GO:0034350	regulation of glial cell apoptotic process	0.0144928	11/18800	0.0396499	0.0682779	0.0272835	PRKCD	1
GO:0034454	microtubule anchoring at centrosome	0.0144928	11/18800	0.0396499	0.0682779	0.0272835	GSK3B	1
GO:0042167	heme catabolic process	0.0144928	11/18800	0.0396499	0.0682779	0.0272835	HMOX1	1
GO:0042447	hormone catabolic process	0.0144928	11/18800	0.0396499	0.0682779	0.0272835	SPP1	1
GO:0045837	negative regulation of membrane potential	0.0144928	11/18800	0.0396499	0.0682779	0.0272835	BAX	1
GO:0046149	pigment catabolic process	0.0144928	11/18800	0.0396499	0.0682779	0.0272835	HMOX1	1
GO:0046643	regulation of gamma-delta T cell activation	0.0144928	11/18800	0.0396499	0.0682779	0.0272835	STAT5B	1
GO:0048262	determination of dorsal/ventral asymmetry	0.0144928	11/18800	0.0396499	0.0682779	0.0272835	CTNNB1	1
GO:0048742	regulation of skeletal muscle fiber development	0.0144928	11/18800	0.0396499	0.0682779	0.0272835	BCL2	1
GO:0052697	xenobiotic glucuronidation	0.0144928	11/18800	0.0396499	0.0682779	0.0272835	UGT1A6	1
GO:0060221	retinal rod cell differentiation	0.0144928	11/18800	0.0396499	0.0682779	0.0272835	NTRK2	1
GO:0060433	bronchus development	0.0144928	11/18800	0.0396499	0.0682779	0.0272835	BMP4	1
GO:0060601	lateral sprouting from an epithelium	0.0144928	11/18800	0.0396499	0.0682779	0.0272835	BMP4	1
GO:0070587	regulation of cell-cell adhesion involved in gastrulation	0.0144928	11/18800	0.0396499	0.0682779	0.0272835	IL10	1
GO:0071394	cellular response to testosterone stimulus	0.0144928	11/18800	0.0396499	0.0682779	0.0272835	SPP1	1
GO:0071609	chemokine (C-C motif) ligand 5 production	0.0144928	11/18800	0.0396499	0.0682779	0.0272835	IL10	1
GO:0071649	regulation of chemokine (C-C motif) ligand 5 production	0.0144928	11/18800	0.0396499	0.0682779	0.0272835	IL10	1
GO:0071679	commissural neuron axon guidance	0.0144928	11/18800	0.0396499	0.0682779	0.0272835	VEGFA	1
GO:0072205	metanephric collecting duct development	0.0144928	11/18800	0.0396499	0.0682779	0.0272835	BMP4	1
GO:0097084	vascular associated smooth muscle cell development	0.0144928	11/18800	0.0396499	0.0682779	0.0272835	VEGFA	1
GO:1900222	negative regulation of amyloid-beta clearance	0.0144928	11/18800	0.0396499	0.0682779	0.0272835	HMGCR	1
GO:1902667	regulation of axon guidance	0.0144928	11/18800	0.0396499	0.0682779	0.0272835	VEGFA	1
GO:1903564	regulation of protein localization to cilium	0.0144928	11/18800	0.0396499	0.0682779	0.0272835	GSK3B	1
GO:1903799	negative regulation of production of miRNAs involved in gene silencing by miRNA	0.0144928	11/18800	0.0396499	0.0682779	0.0272835	TGFB1	1
GO:1905050	positive regulation of metallopeptidase activity	0.0144928	11/18800	0.0396499	0.0682779	0.0272835	STAT3	1
GO:2000826	regulation of heart morphogenesis	0.0144928	11/18800	0.0396499	0.0682779	0.0272835	BMP4	1
GO:2001223	negative regulation of neuron migration	0.0144928	11/18800	0.0396499	0.0682779	0.0272835	STAT3	1
GO:0006112	energy reserve metabolic process	0.0289855	86/18800	0.0398213	0.068465	0.0273583	INSR/GSK3B	2
GO:0033627	cell adhesion mediated by integrin	0.0289855	86/18800	0.0398213	0.068465	0.0273583	SERPINE1/ICAM1	2
GO:0046364	monosaccharide biosynthetic process	0.0289855	86/18800	0.0398213	0.068465	0.0273583	CRTC2/PPARA	2
GO:0032956	regulation of actin cytoskeleton organization	0.057971	352/18800	0.0403929	0.069375	0.0277219	IL1A/PRKCE/MET/PRKCD	4
GO:1904062	regulation of cation transmembrane transport	0.057971	352/18800	0.0403929	0.069375	0.0277219	BAX/PRKCE/MMP9/NEDD4L	4
GO:0002088	lens development in camera-type eye	0.0289855	87/18800	0.0406636	0.0695846	0.0278057	BMP4/CTNNB1	2
GO:0009144	purine nucleoside triphosphate metabolic process	0.0289855	87/18800	0.0406636	0.0695846	0.0278057	TGFB1/PPARA	2
GO:0010232	vascular transport	0.0289855	87/18800	0.0406636	0.0695846	0.0278057	ABCG2/INSR	2
GO:0045069	regulation of viral genome replication	0.0289855	87/18800	0.0406636	0.0695846	0.0278057	BCL2/PPARA	2
GO:0055017	cardiac muscle tissue growth	0.0289855	87/18800	0.0406636	0.0695846	0.0278057	PPARA/SMAD1	2
GO:0150104	transport across blood-brain barrier	0.0289855	87/18800	0.0406636	0.0695846	0.0278057	ABCG2/INSR	2
GO:1990542	mitochondrial transmembrane transport	0.0289855	87/18800	0.0406636	0.0695846	0.0278057	UCP1/UCP2	2
GO:0051262	protein tetramerization	0.0289855	88/18800	0.0415126	0.0709634	0.0283566	TRPA1/CRTC2	2
GO:1903510	mucopolysaccharide metabolic process	0.0289855	88/18800	0.0415126	0.0709634	0.0283566	TGFB1/NFKB1	2
GO:0050807	regulation of synapse organization	0.0434783	209/18800	0.0415539	0.0709969	0.02837	NTRK2/IL10/YWHAZ	3
GO:0009199	ribonucleoside triphosphate metabolic process	0.0289855	89/18800	0.0423683	0.0719318	0.0287436	TGFB1/PPARA	2
GO:0106027	neuron projection organization	0.0289855	89/18800	0.0423683	0.0719318	0.0287436	INSR/GSK3B	2
GO:0001553	luteinization	0.0144928	12/18800	0.0431767	0.0719318	0.0287436	STAT5B	1
GO:0002024	diet induced thermogenesis	0.0144928	12/18800	0.0431767	0.0719318	0.0287436	UCP1	1
GO:0002887	negative regulation of myeloid leukocyte mediated immunity	0.0144928	12/18800	0.0431767	0.0719318	0.0287436	HMOX1	1
GO:0003306	Wnt signaling pathway involved in heart development	0.0144928	12/18800	0.0431767	0.0719318	0.0287436	CTNNB1	1
GO:0006787	porphyrin-containing compound catabolic process	0.0144928	12/18800	0.0431767	0.0719318	0.0287436	HMOX1	1
GO:0006983	ER overload response	0.0144928	12/18800	0.0431767	0.0719318	0.0287436	GSK3B	1
GO:0009950	dorsal/ventral axis specification	0.0144928	12/18800	0.0431767	0.0719318	0.0287436	CTNNB1	1
GO:0014854	response to inactivity	0.0144928	12/18800	0.0431767	0.0719318	0.0287436	IL10	1
GO:0021781	glial cell fate commitment	0.0144928	12/18800	0.0431767	0.0719318	0.0287436	CTNNB1	1
GO:0030656	regulation of vitamin metabolic process	0.0144928	12/18800	0.0431767	0.0719318	0.0287436	NFKB1	1
GO:0032490	detection of molecule of bacterial origin	0.0144928	12/18800	0.0431767	0.0719318	0.0287436	LBP	1
GO:0032817	regulation of natural killer cell proliferation	0.0144928	12/18800	0.0431767	0.0719318	0.0287436	STAT5B	1
GO:0032823	regulation of natural killer cell differentiation	0.0144928	12/18800	0.0431767	0.0719318	0.0287436	STAT5B	1
GO:0033015	tetrapyrrole catabolic process	0.0144928	12/18800	0.0431767	0.0719318	0.0287436	HMOX1	1
GO:0033629	negative regulation of cell adhesion mediated by integrin	0.0144928	12/18800	0.0431767	0.0719318	0.0287436	SERPINE1	1
GO:0034086	maintenance of sister chromatid cohesion	0.0144928	12/18800	0.0431767	0.0719318	0.0287436	RB1	1
GO:0034088	maintenance of mitotic sister chromatid cohesion	0.0144928	12/18800	0.0431767	0.0719318	0.0287436	RB1	1
GO:0035112	genitalia morphogenesis	0.0144928	12/18800	0.0431767	0.0719318	0.0287436	CTNNB1	1
GO:0044650	adhesion of symbiont to host cell	0.0144928	12/18800	0.0431767	0.0719318	0.0287436	ICAM1	1
GO:0044848	biological phase	0.0144928	12/18800	0.0431767	0.0719318	0.0287436	CTNNB1	1
GO:0045602	negative regulation of endothelial cell differentiation	0.0144928	12/18800	0.0431767	0.0719318	0.0287436	VEGFA	1
GO:0048715	negative regulation of oligodendrocyte differentiation	0.0144928	12/18800	0.0431767	0.0719318	0.0287436	CTNNB1	1
GO:0051549	positive regulation of keratinocyte migration	0.0144928	12/18800	0.0431767	0.0719318	0.0287436	MMP9	1
GO:0060019	radial glial cell differentiation	0.0144928	12/18800	0.0431767	0.0719318	0.0287436	STAT3	1
GO:0060312	regulation of blood vessel remodeling	0.0144928	12/18800	0.0431767	0.0719318	0.0287436	TGFB1	1
GO:0060442	branching involved in prostate gland morphogenesis	0.0144928	12/18800	0.0431767	0.0719318	0.0287436	BMP4	1
GO:0060788	ectodermal placode formation	0.0144928	12/18800	0.0431767	0.0719318	0.0287436	CTNNB1	1
GO:0061052	negative regulation of cell growth involved in cardiac muscle cell development	0.0144928	12/18800	0.0431767	0.0719318	0.0287436	PPARA	1
GO:0061309	cardiac neural crest cell development involved in outflow tract morphogenesis	0.0144928	12/18800	0.0431767	0.0719318	0.0287436	BMP4	1
GO:0070254	mucus secretion	0.0144928	12/18800	0.0431767	0.0719318	0.0287436	PRKCE	1
GO:0070493	thrombin-activated receptor signaling pathway	0.0144928	12/18800	0.0431767	0.0719318	0.0287436	MET	1
GO:0070586	cell-cell adhesion involved in gastrulation	0.0144928	12/18800	0.0431767	0.0719318	0.0287436	IL10	1
GO:0070601	centromeric sister chromatid cohesion	0.0144928	12/18800	0.0431767	0.0719318	0.0287436	CTNNB1	1
GO:0071372	cellular response to follicle-stimulating hormone stimulus	0.0144928	12/18800	0.0431767	0.0719318	0.0287436	PLAT	1
GO:0071697	ectodermal placode morphogenesis	0.0144928	12/18800	0.0431767	0.0719318	0.0287436	CTNNB1	1
GO:0072015	glomerular visceral epithelial cell development	0.0144928	12/18800	0.0431767	0.0719318	0.0287436	BMP4	1
GO:0072178	nephric duct morphogenesis	0.0144928	12/18800	0.0431767	0.0719318	0.0287436	BMP4	1
GO:0072182	regulation of nephron tubule epithelial cell differentiation	0.0144928	12/18800	0.0431767	0.0719318	0.0287436	CTNNB1	1
GO:0090331	negative regulation of platelet aggregation	0.0144928	12/18800	0.0431767	0.0719318	0.0287436	PRKCD	1
GO:0150065	regulation of deacetylase activity	0.0144928	12/18800	0.0431767	0.0719318	0.0287436	VEGFA	1
GO:1902337	regulation of apoptotic process involved in morphogenesis	0.0144928	12/18800	0.0431767	0.0719318	0.0287436	BAX	1
GO:1904321	response to forskolin	0.0144928	12/18800	0.0431767	0.0719318	0.0287436	AHR	1
GO:1904322	cellular response to forskolin	0.0144928	12/18800	0.0431767	0.0719318	0.0287436	AHR	1
GO:1904953	Wnt signaling pathway involved in midbrain dopaminergic neuron differentiation	0.0144928	12/18800	0.0431767	0.0719318	0.0287436	CTNNB1	1
GO:2000009	negative regulation of protein localization to cell surface	0.0144928	12/18800	0.0431767	0.0719318	0.0287436	NEDD4L	1
GO:2000303	regulation of ceramide biosynthetic process	0.0144928	12/18800	0.0431767	0.0719318	0.0287436	PRKCD	1
GO:2000628	regulation of miRNA metabolic process	0.0144928	12/18800	0.0431767	0.0719318	0.0287436	NFKB1	1
GO:0002028	regulation of sodium ion transport	0.0289855	90/18800	0.0432307	0.0719486	0.0287503	PRKCE/NEDD4L	2
GO:0030901	midbrain development	0.0289855	90/18800	0.0432307	0.0719486	0.0287503	CTNNB1/SMAD1	2
GO:0051983	regulation of chromosome segregation	0.0289855	91/18800	0.0440996	0.0733575	0.0293133	CDC6/RB1	2
GO:0050803	regulation of synapse structure or activity	0.0434783	215/18800	0.0445661	0.0740959	0.0296084	NTRK2/IL10/YWHAZ	3
GO:0043087	regulation of GTPase activity	0.057971	364/18800	0.0447507	0.0743651	0.0297159	ERBB2/NTRK2/MET/GSK3B	4
GO:0019217	regulation of fatty acid metabolic process	0.0289855	92/18800	0.044975	0.0746999	0.0298497	PPARD/PPARA	2
GO:0006473	protein acetylation	0.0434783	216/18800	0.0450785	0.074834	0.0299033	MAPK3/GSK3B/CRTC2	3
GO:0030516	regulation of axon extension	0.0289855	93/18800	0.0458568	0.075796	0.0302877	GSK3B/VEGFA	2
GO:0032273	positive regulation of protein polymerization	0.0289855	93/18800	0.0458568	0.075796	0.0302877	PRKCE/MET	2
GO:0045185	maintenance of protein location	0.0289855	93/18800	0.0458568	0.075796	0.0302877	NFKBIA/IL10	2
GO:0044242	cellular lipid catabolic process	0.0434783	219/18800	0.0466335	0.075796	0.0302877	PPARD/PPARA/PRKCD	3
GO:0051651	maintenance of location in cell	0.0434783	219/18800	0.0466335	0.075796	0.0302877	TRPA1/BAX/PRKCE	3
GO:0009650	UV protection	0.0144928	13/18800	0.0466907	0.075796	0.0302877	ERCC1	1
GO:0021819	layer formation in cerebral cortex	0.0144928	13/18800	0.0466907	0.075796	0.0302877	CTNNB1	1
GO:0021978	telencephalon regionalization	0.0144928	13/18800	0.0466907	0.075796	0.0302877	BMP4	1
GO:0032372	negative regulation of sterol transport	0.0144928	13/18800	0.0466907	0.075796	0.0302877	NFKB1	1
GO:0032375	negative regulation of cholesterol transport	0.0144928	13/18800	0.0466907	0.075796	0.0302877	NFKB1	1
GO:0032494	response to peptidoglycan	0.0144928	13/18800	0.0466907	0.075796	0.0302877	IL6	1
GO:0032621	interleukin-18 production	0.0144928	13/18800	0.0466907	0.075796	0.0302877	IL10	1
GO:0032661	regulation of interleukin-18 production	0.0144928	13/18800	0.0466907	0.075796	0.0302877	IL10	1
GO:0033689	negative regulation of osteoblast proliferation	0.0144928	13/18800	0.0466907	0.075796	0.0302877	BCL2	1
GO:0035745	T-helper 2 cell cytokine production	0.0144928	13/18800	0.0466907	0.075796	0.0302877	IL6	1
GO:0042362	fat-soluble vitamin biosynthetic process	0.0144928	13/18800	0.0466907	0.075796	0.0302877	NFKB1	1
GO:0042492	gamma-delta T cell differentiation	0.0144928	13/18800	0.0466907	0.075796	0.0302877	STAT5B	1
GO:0042541	hemoglobin biosynthetic process	0.0144928	13/18800	0.0466907	0.075796	0.0302877	HIF1A	1
GO:0043247	telomere maintenance in response to DNA damage	0.0144928	13/18800	0.0466907	0.075796	0.0302877	ERCC1	1
GO:0043970	histone H3-K9 acetylation	0.0144928	13/18800	0.0466907	0.075796	0.0302877	CRTC2	1
GO:0046415	urate metabolic process	0.0144928	13/18800	0.0466907	0.075796	0.0302877	ABCG2	1
GO:0048934	peripheral nervous system neuron differentiation	0.0144928	13/18800	0.0466907	0.075796	0.0302877	NTRK2	1
GO:0048935	peripheral nervous system neuron development	0.0144928	13/18800	0.0466907	0.075796	0.0302877	NTRK2	1
GO:0060009	Sertoli cell development	0.0144928	13/18800	0.0466907	0.075796	0.0302877	IL1A	1
[truncated: 35 more rows]
