# Supplementary material for: Elucidation of the anti-colorectal cancer mechanism of Atractylodes lancea by network pharmacology and experimental verification
Source: Aging (Albany NY). 2024 Aug 22;16(16):12008–28. doi: 10.18632/aging.206075 (PMC11386916; doi:10.18632/aging.206075)
Supplement: Supplementary Table 9 [file aging-16-206075-s009.xlsx]

## Sheet: KEGG.result_all
Supplementary Table 9. KEGG pathways enrichment analysis of potential target genes of Atractylodes lancea’s potential bioactive compounds (p-value ≤ 0.05).
ID	Description	GeneRatio	BgRatio	pvalue	p.adjust	qvalue	geneID	Count
hsa05161	Hepatitis B	0.279412	162/8192	2.12052e-17	3.80256e-15	1.20469e-15	MAPK1/NFKBIA/TGFB1/NFKB1/MAPK3/STAT3/CDK2/RB1/BAX/STAT5B/FOS/CASP3/CASP9/MMP9/BCL2/CDKN1A/IL6/YWHAZ/TBK1	19
hsa05215	Prostate cancer	0.235294	97/8192	3.69181e-17	3.80256e-15	1.20469e-15	MAPK1/NFKBIA/PLAT/NFKB1/MAPK3/CDK2/RB1/ERBB2/EGFR/MMP3/GSK3B/CASP9/CTNNB1/MMP9/BCL2/CDKN1A	16
hsa04933	AGE-RAGE signaling pathway in diabetic complications	0.235294	100/8192	6.15242e-17	4.22466e-15	1.33842e-15	MAPK1/TGFB1/SERPINE1/NFKB1/MAPK3/IL1A/STAT3/ICAM1/BAX/STAT5B/PRKCE/CASP3/BCL2/IL6/VEGFA/PRKCD	16
hsa05160	Hepatitis C	0.264706	157/8192	2.54191e-16	1.30908e-14	4.14732e-15	MAPK1/NFKBIA/NFKB1/MAPK3/STAT3/CDK2/RB1/EGFR/BAX/CASP3/CFLAR/GSK3B/CASP9/CTNNB1/CDKN1A/PPARA/YWHAZ/TBK1	18
hsa04151	PI3K-Akt signaling pathway	0.338235	354/8192	2.78446e-15	1.1472e-13	3.63445e-14	NGFR/MAPK1/HGF/NFKB1/MAPK3/CDK2/ERBB2/EGFR/NTRK2/BCL2L1/INSR/MET/GSK3B/CASP9/CRTC2/MCL1/SPP1/BCL2/CDKN1A/IL6/PGF/VEGFA/YWHAZ	23
hsa04066	HIF-1 signaling pathway	0.220588	109/8192	6.68385e-15	2.29479e-13	7.27015e-14	MAPK1/HMOX1/TIMP1/SERPINE1/NFKB1/MAPK3/STAT3/ERBB2/EGFR/INSR/BCL2/CDKN1A/IL6/HIF1A/VEGFA	15
hsa05167	Kaposi sarcoma-associated herpesvirus infection	0.264706	194/8192	1.12492e-14	3.31047e-13	1.0488e-13	MAPK1/NFKBIA/NFKB1/MAPK3/STAT3/ICAM1/RB1/BAX/FOS/CASP3/GSK3B/CASP9/CTNNB1/CDKN1A/IL6/HIF1A/VEGFA/TBK1	18
hsa05162	Measles	0.235294	139/8192	1.36546e-14	3.51606e-13	1.11393e-13	NFKBIA/NFKB1/IL1A/STAT3/CDK2/BAX/STAT5B/BCL2L1/FOS/CASP3/GSK3B/CASP9/BCL2/IL6/TBK1/BBC3	16
hsa05212	Pancreatic cancer	0.191176	76/8192	2.70981e-14	6.20245e-13	1.96501e-13	MAPK1/TGFB1/NFKB1/MAPK3/STAT3/RB1/ERBB2/EGFR/BAX/BCL2L1/CASP9/CDKN1A/VEGFA	13
hsa01521	EGFR tyrosine kinase inhibitor resistance	0.191176	79/8192	4.59526e-14	9.46623e-13	2.99901e-13	MAPK1/HGF/MAPK3/STAT3/ERBB2/EGFR/BAX/BCL2L1/MET/GSK3B/BCL2/IL6/VEGFA	13
hsa05417	Lipid and atherosclerosis	0.264706	215/8192	6.85618e-14	1.28398e-12	4.06778e-13	MAPK1/NFKBIA/LBP/NFKB1/MAPK3/STAT3/ICAM1/BAX/MMP3/BCL2L1/FOS/CASP3/GSK3B/CASP9/MMP9/BCL2/IL6/TBK1	18
hsa05210	Colorectal cancer	0.191176	86/8192	1.45004e-13	2.48923e-12	7.88618e-13	MAPK1/TGFB1/MAPK3/EGFR/BAX/FOS/CASP3/GSK3B/CASP9/CTNNB1/BCL2/CDKN1A/BBC3	13
hsa05223	Non-small cell lung cancer	0.176471	72/8192	4.03959e-13	6.4012e-12	2.02797e-12	MAPK1/HGF/MAPK3/STAT3/RB1/ERBB2/EGFR/BAX/STAT5B/MET/CASP9/CDKN1A	12
hsa04657	IL-17 signaling pathway	0.176471	94/8192	1.09138e-11	1.60589e-10	5.08764e-11	MAPK1/NFKBIA/NFKB1/MMP13/MAPK3/MMP3/FOS/CASP3/GSK3B/MMP9/IL6/TBK1	12
hsa05226	Gastric cancer	0.205882	149/8192	1.24315e-11	1.70012e-10	5.38617e-11	MAPK1/TGFB1/HGF/MAPK3/CDK2/RB1/ERBB2/EGFR/BAX/MET/GSK3B/CTNNB1/BCL2/CDKN1A	14
hsa01524	Platinum drug resistance	0.161765	73/8192	1.32048e-11	1.70012e-10	5.38617e-11	ERCC1/MAPK1/MAPK3/ERBB2/BAX/BCL2L1/CASP3/CASP9/BCL2/CDKN1A/BBC3	11
hsa05166	Human T-cell leukemia virus 1 infection	0.235294	222/8192	2.08059e-11	2.52119e-10	7.98742e-11	MAPK1/NFKBIA/RELB/TGFB1/NFKB1/MAPK3/ICAM1/CDK2/RB1/BAX/STAT5B/BCL2L1/FOS/CRTC2/CDKN1A/IL6	16
hsa05163	Human cytomegalovirus infection	0.235294	225/8192	2.55133e-11	2.91986e-10	9.25044e-11	MAPK1/NFKBIA/NFKB1/MAPK3/STAT3/RB1/EGFR/BAX/CASP3/GSK3B/CASP9/CTNNB1/CDKN1A/IL6/VEGFA/TBK1	16
hsa04210	Apoptosis	0.191176	136/8192	5.87798e-11	6.37297e-10	2.01903e-10	MAPK1/NFKBIA/NFKB1/MAPK3/BAX/BCL2L1/FOS/CASP3/CFLAR/CASP9/MCL1/BCL2/BBC3	13
hsa04010	MAPK signaling pathway	0.25	294/8192	1.47554e-10	1.51981e-09	4.81493e-10	NGFR/MAPK1/RELB/TGFB1/HGF/NFKB1/MAPK3/IL1A/ERBB2/EGFR/NTRK2/INSR/FOS/CASP3/MET/PGF/VEGFA	17
hsa01522	Endocrine resistance	0.161765	98/8192	3.53956e-10	3.47214e-09	1.10002e-09	MAPK1/BIK/MAPK3/RB1/ERBB2/EGFR/BAX/FOS/MMP9/BCL2/CDKN1A	11
hsa05220	Chronic myeloid leukemia	0.147059	76/8192	4.85183e-10	4.54308e-09	1.4393e-09	MAPK1/NFKBIA/TGFB1/NFKB1/MAPK3/RB1/BAX/STAT5B/BCL2L1/CDKN1A	10
hsa05169	Epstein-Barr virus infection	0.205882	202/8192	7.48244e-10	6.70166e-09	2.12316e-09	NFKBIA/RELB/NFKB1/STAT3/ICAM1/CDK2/RB1/BAX/CASP3/CASP9/BCL2/CDKN1A/IL6/TBK1	14
hsa05213	Endometrial cancer	0.132353	58/8192	8.36472e-10	6.92464e-09	2.19381e-09	MAPK1/MAPK3/ERBB2/EGFR/BAX/GSK3B/CASP9/CTNNB1/CDKN1A	9
hsa05225	Hepatocellular carcinoma	0.191176	168/8192	8.40369e-10	6.92464e-09	2.19381e-09	MAPK1/HMOX1/TGFB1/HGF/MAPK3/RB1/EGFR/BAX/BCL2L1/MET/GSK3B/CTNNB1/CDKN1A	13
hsa05205	Proteoglycans in cancer	0.205882	205/8192	9.08844e-10	7.20084e-09	2.28131e-09	MAPK1/TGFB1/HGF/MAPK3/STAT3/ERBB2/EGFR/CASP3/MET/CTNNB1/MMP9/CDKN1A/HIF1A/VEGFA	14
hsa04659	Th17 cell differentiation	0.161765	108/8192	1.02179e-09	7.79591e-09	2.46983e-09	MAPK1/NFKBIA/TGFB1/NFKB1/AHR/MAPK3/STAT3/STAT5B/FOS/IL6/HIF1A	11
hsa05219	Bladder cancer	0.117647	41/8192	1.13535e-09	8.35291e-09	2.6463e-09	MAPK1/MAPK3/RB1/ERBB2/EGFR/MMP9/CDKN1A/VEGFA	8
hsa05207	Chemical carcinogenesis - receptor activation	0.205882	212/8192	1.41314e-09	1.00382e-08	3.18021e-09	CDC6/MAPK1/NFKB1/AHR/MAPK3/STAT3/RB1/EGFR/STAT5B/UGT1A6/FOS/BCL2/VEGFA/PPARA	14
hsa04668	TNF signaling pathway	0.161765	112/8192	1.51474e-09	1.00657e-08	3.18893e-09	MAPK1/NFKBIA/NFKB1/MAPK3/ICAM1/MMP3/FOS/CASP3/CFLAR/MMP9/IL6	11
hsa05145	Toxoplasmosis	0.161765	112/8192	1.51474e-09	1.00657e-08	3.18893e-09	MAPK1/NFKBIA/TGFB1/NFKB1/MAPK3/STAT3/BCL2L1/CASP3/CASP9/BCL2/IL10	11
hsa05222	Small cell lung cancer	0.147059	92/8192	3.30357e-09	2.12667e-08	6.73755e-09	NFKBIA/NFKB1/CDK2/RB1/BAX/BCL2L1/CASP3/CASP9/BCL2/CDKN1A	10
hsa04215	Apoptosis - multiple species	0.102941	32/8192	5.65453e-09	3.5298e-08	1.11828e-08	NGFR/BAX/BCL2L1/CASP3/CASP9/BCL2/BBC3	7
hsa04115	p53 signaling pathway	0.132353	73/8192	6.91472e-09	4.18951e-08	1.32728e-08	SERPINE1/CDK2/BAX/BCL2L1/CASP3/CASP9/BCL2/CDKN1A/BBC3	9
hsa04510	Focal adhesion	0.191176	201/8192	7.59781e-09	4.47185e-08	1.41673e-08	VCL/MAPK1/HGF/MAPK3/ERBB2/EGFR/MET/GSK3B/CTNNB1/SPP1/BCL2/PGF/VEGFA	13
hsa05142	Chagas disease	0.147059	102/8192	9.14519e-09	5.23308e-08	1.6579e-08	MAPK1/NFKBIA/TGFB1/SERPINE1/NFKB1/MAPK3/FOS/CFLAR/IL6/IL10	10
hsa05418	Fluid shear stress and atherosclerosis	0.161765	139/8192	1.51473e-08	8.43334e-08	2.67178e-08	HMOX1/PLAT/NFKB1/BMP4/IL1A/ICAM1/FOS/CTNNB1/MMP9/BCL2/VEGFA	11
hsa04931	Insulin resistance	0.147059	108/8192	1.59892e-08	8.66785e-08	2.74608e-08	NFKBIA/NFKB1/STAT3/INSR/PRKCE/GSK3B/CRTC2/IL6/PPARA/PRKCD	10
hsa05152	Tuberculosis	0.176471	180/8192	2.18878e-08	1.15613e-07	3.66274e-08	MAPK1/LBP/TGFB1/NFKB1/MAPK3/IL1A/BAX/CASP3/CASP9/BCL2/IL6/IL10	12
hsa05206	MicroRNAs in cancer	0.220588	310/8192	2.40683e-08	1.23952e-07	3.92693e-08	MAPK1/HMOX1/NFKB1/MAPK3/STAT3/ERBB2/EGFR/PRKCE/CASP3/MET/MCL1/MMP9/BCL2/CDKN1A/VEGFA	15
hsa05208	Chemical carcinogenesis - reactive oxygen species	0.191176	223/8192	2.65227e-08	1.33261e-07	4.22185e-08	MAPK1/HMOX1/NFKBIA/HGF/NFKB1/AHR/MAPK3/EGFR/FOS/MET/HIF1A/VEGFA/PRKCD	13
hsa04722	Neurotrophin signaling pathway	0.147059	119/8192	4.09002e-08	2.00606e-07	6.35542e-08	NGFR/MAPK1/NFKBIA/NFKB1/MAPK3/NTRK2/BAX/GSK3B/BCL2/PRKCD	10
hsa04014	Ras signaling pathway	0.191176	236/8192	5.20262e-08	2.49242e-07	7.89627e-08	NGFR/MAPK1/HGF/NFKB1/MAPK3/EGFR/NTRK2/BCL2L1/INSR/MET/PGF/VEGFA/TBK1	13
hsa05211	Renal cell carcinoma	0.117647	69/8192	8.27159e-08	3.87261e-07	1.22689e-07	MAPK1/TGFB1/HGF/MAPK3/MET/CDKN1A/HIF1A/VEGFA	8
hsa05203	Viral carcinogenesis	0.176471	204/8192	8.81198e-08	3.90258e-07	1.23638e-07	MAPK1/NFKBIA/NFKB1/MAPK3/STAT3/CDK2/RB1/BAX/STAT5B/CASP3/CDKN1A/YWHAZ	12
hsa04926	Relaxin signaling pathway	0.147059	129/8192	8.85774e-08	3.90258e-07	1.23638e-07	MAPK1/NFKBIA/TGFB1/NFKB1/MMP13/MAPK3/EGFR/FOS/MMP9/VEGFA	10
hsa05131	Shigellosis	0.191176	247/8192	8.90395e-08	3.90258e-07	1.23638e-07	VCL/MAPK1/NFKBIA/NFKB1/MAPK3/EGFR/BAX/BCL2L1/PRKCE/GSK3B/BCL2/PRKCD/TBK1	13
hsa04068	FoxO signaling pathway	0.147059	131/8192	1.02546e-07	4.36714e-07	1.38356e-07	MAPK1/TGFB1/MAPK3/STAT3/CDK2/EGFR/INSR/CDKN1A/IL6/IL10	10
hsa04520	Adherens junction	0.117647	71/8192	1.03879e-07	4.36714e-07	1.38356e-07	VCL/MAPK1/MAPK3/ERBB2/EGFR/INSR/MET/CTNNB1	8
hsa05218	Melanoma	0.117647	72/8192	1.16101e-07	4.78334e-07	1.51542e-07	MAPK1/HGF/MAPK3/RB1/EGFR/BAX/MET/CDKN1A	8
hsa05164	Influenza A	0.161765	171/8192	1.30006e-07	5.2512e-07	1.66364e-07	MAPK1/NFKBIA/NFKB1/MAPK3/IL1A/ICAM1/BAX/CASP3/CASP9/IL6/TBK1	11
hsa04620	Toll-like receptor signaling pathway	0.132353	104/8192	1.5982e-07	6.33133e-07	2.00584e-07	MAPK1/NFKBIA/LBP/NFKB1/MAPK3/FOS/SPP1/IL6/TBK1	9
hsa05133	Pertussis	0.117647	76/8192	1.78175e-07	6.92529e-07	2.19401e-07	MAPK1/NFKB1/MAPK3/IL1A/FOS/CASP3/IL6/IL10	8
hsa05140	Leishmaniasis	0.117647	77/8192	1.97535e-07	7.5356e-07	2.38736e-07	MAPK1/NFKBIA/TGFB1/NFKB1/MAPK3/IL1A/FOS/IL10	8
hsa05224	Breast cancer	0.147059	147/8192	3.04202e-07	1.13938e-06	3.60967e-07	MAPK1/MAPK3/RB1/ERBB2/EGFR/BAX/FOS/GSK3B/CTNNB1/CDKN1A	10
hsa05165	Human papillomavirus infection	0.205882	331/8192	3.99976e-07	1.47134e-06	4.66137e-07	MAPK1/NFKB1/MAPK3/CDK2/RB1/EGFR/BAX/CASP3/GSK3B/CTNNB1/SPP1/CDKN1A/VEGFA/TBK1	14
hsa05202	Transcriptional misregulation in cancer	0.161765	193/8192	4.43418e-07	1.60253e-06	5.07699e-07	NGFR/PLAT/NFKB1/BAX/MMP3/BCL2L1/MET/MMP9/CDKN1A/IL6/SMAD1	11
hsa04932	Non-alcoholic fatty liver disease	0.147059	155/8192	4.98699e-07	1.77124e-06	5.6115e-07	TGFB1/NFKB1/IL1A/BAX/INSR/FOS/CASP3/GSK3B/IL6/PPARA	10
hsa04218	Cellular senescence	0.147059	156/8192	5.29396e-07	1.8484e-06	5.85594e-07	MAPK1/TGFB1/SERPINE1/NFKB1/MAPK3/IL1A/CDK2/RB1/CDKN1A/IL6	10
hsa05235	PD-L1 expression and PD-1 checkpoint pathway in cancer	0.117647	89/8192	6.12889e-07	2.10425e-06	6.66652e-07	MAPK1/NFKBIA/NFKB1/MAPK3/STAT3/EGFR/FOS/HIF1A	8
hsa05170	Human immunodeficiency virus 1 infection	0.161765	212/8192	1.13072e-06	3.81851e-06	1.20975e-06	MAPK1/NFKBIA/NFKB1/MAPK3/BAX/BCL2L1/FOS/CASP3/CASP9/BCL2/TBK1	11
hsa04917	Prolactin signaling pathway	0.102941	70/8192	1.5706e-06	5.21843e-06	1.65326e-06	MAPK1/NFKB1/MAPK3/STAT3/STAT5B/FOS/GSK3B	7
hsa05135	Yersinia infection	0.132353	137/8192	1.67935e-06	5.49121e-06	1.73968e-06	MAPK1/NFKBIA/NFKB1/MAPK3/FOS/GSK3B/IL6/IL10/TBK1	9
hsa04064	NF-kappa B signaling pathway	0.117647	104/8192	2.02604e-06	6.421e-06	2.03425e-06	NFKBIA/LBP/RELB/NFKB1/ICAM1/BCL2L1/CFLAR/BCL2	8
hsa04625	C-type lectin receptor signaling pathway	0.117647	104/8192	2.02604e-06	6.421e-06	2.03425e-06	MAPK1/NFKBIA/RELB/NFKB1/MAPK3/IL6/IL10/PRKCD	8
hsa04140	Autophagy - animal	0.132353	141/8192	2.13618e-06	6.66746e-06	2.11233e-06	MAPK1/MAPK3/BCL2L1/CFLAR/HMGB1/BCL2/HIF1A/PRKCD/TBK1	9
hsa04936	Alcoholic liver disease	0.132353	142/8192	2.26585e-06	6.96665e-06	2.20711e-06	NFKBIA/LBP/NFKB1/CASP3/GSK3B/CTNNB1/IL6/PPARA/TBK1	9
hsa05144	Malaria	0.0882353	50/8192	3.11738e-06	9.44382e-06	2.99191e-06	TGFB1/HGF/ICAM1/MET/IL6/IL10	6
hsa04934	Cushing syndrome	0.132353	155/8192	4.68026e-06	1.39729e-05	4.42679e-06	MAPK1/AHR/MAPK3/CDK2/RB1/EGFR/GSK3B/CTNNB1/CDKN1A	9
hsa04012	ErbB signaling pathway	0.102941	85/8192	5.86235e-06	1.72521e-05	5.46565e-06	MAPK1/MAPK3/ERBB2/EGFR/STAT5B/GSK3B/CDKN1A	7
hsa04015	Rap1 signaling pathway	0.147059	210/8192	7.8548e-06	2.279e-05	7.22013e-06	NGFR/MAPK1/HGF/MAPK3/EGFR/INSR/MET/CTNNB1/PGF/VEGFA	10
hsa04630	JAK-STAT signaling pathway	0.132353	166/8192	8.20172e-06	2.3466e-05	7.43431e-06	STAT3/EGFR/STAT5B/BCL2L1/MCL1/BCL2/CDKN1A/IL6/IL10	9
hsa04380	Osteoclast differentiation	0.117647	128/8192	9.60914e-06	2.71162e-05	8.59072e-06	MAPK1/NFKBIA/RELB/TGFB1/NFKB1/MAPK3/IL1A/FOS	8
hsa05323	Rheumatoid arthritis	0.102941	93/8192	1.06782e-05	2.97259e-05	9.41751e-06	TGFB1/IL1A/ICAM1/MMP3/FOS/IL6/VEGFA	7
hsa05216	Thyroid cancer	0.0735294	37/8192	1.20475e-05	3.30903e-05	1.04834e-05	MAPK1/MAPK3/BAX/CTNNB1/CDKN1A	5
hsa05321	Inflammatory bowel disease	0.0882353	65/8192	1.46983e-05	3.98402e-05	1.26218e-05	TGFB1/NFKB1/IL1A/STAT3/IL6/IL10	6
hsa05221	Acute myeloid leukemia	0.0882353	67/8192	1.75291e-05	4.68961e-05	1.48572e-05	MAPK1/NFKB1/MAPK3/STAT3/STAT5B/PPARD	6
hsa05171	Coronavirus disease - COVID-19	0.147059	232/8192	1.88136e-05	4.90734e-05	1.5547e-05	MAPK1/NFKBIA/NFKB1/MAPK3/STAT3/EGFR/MMP3/FOS/IL6/TBK1	10
hsa04621	NOD-like receptor signaling pathway	0.132353	184/8192	1.88194e-05	4.90734e-05	1.5547e-05	MAPK1/NFKBIA/NFKB1/MAPK3/BCL2L1/BCL2/IL6/PRKCD/TBK1	9
hsa04660	T cell receptor signaling pathway	0.102941	104/8192	2.22823e-05	5.7377e-05	1.81777e-05	MAPK1/NFKBIA/NFKB1/MAPK3/FOS/GSK3B/IL10	7
hsa05230	Central carbon metabolism in cancer	0.0882353	70/8192	2.25859e-05	5.74407e-05	1.81979e-05	MAPK1/MAPK3/ERBB2/EGFR/MET/HIF1A	6
hsa04928	Parathyroid hormone synthesis, secretion and action	0.102941	106/8192	2.52298e-05	6.33822e-05	2.00802e-05	MAPK1/MMP13/MAPK3/EGFR/FOS/BCL2/CDKN1A	7
hsa05130	Pathogenic Escherichia coli infection	0.132353	197/8192	3.23757e-05	8.03541e-05	2.54571e-05	MAPK1/NFKBIA/NFKB1/MAPK3/BAX/FOS/CASP3/CASP9/IL6	9
hsa05214	Glioma	0.0882353	75/8192	3.35773e-05	8.23442e-05	2.60876e-05	MAPK1/MAPK3/RB1/EGFR/BAX/CDKN1A	6
hsa05132	Salmonella infection	0.147059	249/8192	3.46105e-05	8.38796e-05	2.6574e-05	MAPK1/NFKBIA/NFKB1/MAPK3/BAX/FOS/CASP3/CTNNB1/BCL2/IL6	10
hsa04930	Type II diabetes mellitus	0.0735294	46/8192	3.57605e-05	8.56588e-05	2.71377e-05	MAPK1/MAPK3/INSR/PRKCE/PRKCD	5
hsa04390	Hippo signaling pathway	0.117647	157/8192	4.24457e-05	0.000100504	3.18407e-05	TGFB1/SERPINE1/BMP4/GSK3B/CTNNB1/YWHAZ/SMAD1/BBC3	8
hsa04662	B cell receptor signaling pathway	0.0882353	82/8192	5.5795e-05	0.000130611	4.13791e-05	MAPK1/NFKBIA/NFKB1/MAPK3/FOS/GSK3B	6
hsa04919	Thyroid hormone signaling pathway	0.102941	121/8192	5.92602e-05	0.000137164	4.34552e-05	MAPK1/BMP4/MAPK3/GSK3B/CASP9/CTNNB1/HIF1A	7
hsa04110	Cell cycle	0.102941	127/8192	8.0639e-05	0.000184574	5.8475e-05	CDC6/TGFB1/CDK2/RB1/GSK3B/CDKN1A/YWHAZ	7
hsa05134	Legionellosis	0.0735294	57/8192	0.0001018	0.000230448	7.30087e-05	NFKBIA/NFKB1/CASP3/CASP9/IL6	5
hsa04658	Th1 and Th2 cell differentiation	0.0882353	92/8192	0.000106478	0.000238418	7.55335e-05	MAPK1/NFKBIA/NFKB1/MAPK3/STAT5B/FOS	6
hsa05022	Pathways of neurodegeneration - multiple diseases	0.191176	476/8192	0.000120613	0.000267164	8.46405e-05	MAPK1/NFKB1/MAPK3/IL1A/BAX/BCL2L1/CASP3/GSK3B/CASP9/CTNNB1/BCL2/IL6/TBK1	13
hsa04350	TGF-beta signaling pathway	0.0882353	95/8192	0.000127276	0.000278923	8.83661e-05	CHRD/MAPK1/TGFB1/BMP4/MAPK3/SMAD1	6
hsa04915	Estrogen signaling pathway	0.102941	138/8192	0.000136069	0.000295056	9.3477e-05	MAPK1/MAPK3/EGFR/FOS/MMP9/BCL2/PRKCD	7
hsa04371	Apelin signaling pathway	0.102941	139/8192	0.000142352	0.000305463	9.67741e-05	MAPK1/PLAT/SERPINE1/UCP1/MAPK3/PRKCE/SPP1	7
hsa05217	Basal cell carcinoma	0.0735294	63/8192	0.000164451	0.000349246	0.000110645	BMP4/BAX/GSK3B/CTNNB1/CDKN1A	5
hsa04550	Signaling pathways regulating pluripotency of stem cells	0.102941	143/8192	0.000169883	0.000357101	0.000113134	MAPK1/BMP4/MAPK3/STAT3/GSK3B/CTNNB1/SMAD1	7
hsa04062	Chemokine signaling pathway	0.117647	192/8192	0.000174548	0.0003632	0.000115066	MAPK1/NFKBIA/NFKB1/MAPK3/STAT3/STAT5B/GSK3B/PRKCD	8
hsa05146	Amoebiasis	0.0882353	102/8192	0.000188437	0.000388181	0.00012298	VCL/TGFB1/NFKB1/CASP3/IL6/IL10	6
hsa04960	Aldosterone-regulated sodium reabsorption	0.0588235	37/8192	0.000233335	0.000475911	0.000150774	MAPK1/MAPK3/INSR/NEDD4L	4
hsa05120	Epithelial cell signaling in Helicobacter pylori infection	0.0735294	70/8192	0.000270767	0.000546842	0.000173246	NFKBIA/NFKB1/EGFR/CASP3/MET	5
hsa04217	Necroptosis	0.102941	159/8192	0.000326419	0.000652838	0.000206826	IL1A/STAT3/BAX/STAT5B/CFLAR/HMGB1/BCL2	7
hsa05020	Prion disease	0.132353	273/8192	0.000390469	0.000773429	0.000245031	MAPK1/MAPK3/IL1A/BAX/CASP3/GSK3B/CASP9/IL6/PRKCD	9
hsa04071	Sphingolipid signaling pathway	0.0882353	119/8192	0.00043492	0.000853271	0.000270326	MAPK1/NFKB1/MAPK3/BAX/PRKCE/BCL2	6
hsa04935	Growth hormone synthesis, secretion and action	0.0882353	120/8192	0.000454852	0.000883958	0.000280048	MAPK1/MAPK3/STAT3/STAT5B/FOS/GSK3B	6
hsa05010	Alzheimer disease	0.147059	384/8192	0.00115934	0.002232	0.000707123	MAPK1/NFKB1/MAPK3/IL1A/INSR/CASP3/GSK3B/CASP9/CTNNB1/IL6	10
hsa05231	Choline metabolism in cancer	0.0735294	98/8192	0.00127052	0.0024234	0.000767762	MAPK1/MAPK3/EGFR/FOS/HIF1A	5
hsa05415	Diabetic cardiomyopathy	0.102941	203/8192	0.00139452	0.00262579	0.000831882	TGFB1/NFKB1/INSR/GSK3B/MMP9/PPARA/PRKCD	7
hsa04370	VEGF signaling pathway	0.0588235	59/8192	0.00140212	0.00262579	0.000831882	MAPK1/MAPK3/CASP9/VEGFA	4
hsa04623	Cytosolic DNA-sensing pathway	0.0588235	63/8192	0.00179006	0.00332209	0.00105248	NFKBIA/NFKB1/IL6/TBK1	4
hsa01523	Antifolate resistance	0.0441176	30/8192	0.00189195	0.00347983	0.00110245	NFKB1/ABCG2/IL6	3
hsa04920	Adipocytokine signaling pathway	0.0588235	69/8192	0.00250301	0.004563	0.00144561	NFKBIA/NFKB1/STAT3/PPARA	4
hsa05143	African trypanosomiasis	0.0441176	37/8192	0.00347394	0.00627748	0.00198878	ICAM1/IL6/IL10	3
hsa04912	GnRH signaling pathway	0.0588235	93/8192	0.00728715	0.0130535	0.0041355	MAPK1/MAPK3/EGFR/PRKCD	4
hsa04672	Intestinal immune network for IgA production	0.0441176	49/8192	0.00767463	0.0136291	0.00431785	TGFB1/IL6/IL10	3
hsa04666	Fc gamma R-mediated phagocytosis	0.0588235	97/8192	0.00843687	0.0148547	0.00470612	MAPK1/MAPK3/PRKCE/PRKCD	4
hsa04921	Oxytocin signaling pathway	0.0735294	154/8192	0.00885985	0.0154672	0.00490018	MAPK1/MAPK3/EGFR/FOS/CDKN1A	5
hsa04916	Melanogenesis	0.0588235	101/8192	0.00969979	0.0167912	0.00531965	MAPK1/MAPK3/GSK3B/CTNNB1	4
hsa04024	cAMP signaling pathway	0.0882353	221/8192	0.00979941	0.0168223	0.00532951	MAPK1/NFKBIA/NFKB1/MAPK3/FOS/PPARA	6
hsa05416	Viral myocarditis	0.0441176	60/8192	0.0133627	0.0227498	0.00720739	ICAM1/CASP3/CASP9	3
hsa04725	Cholinergic synapse	0.0588235	113/8192	0.0142077	0.023955	0.00758922	MAPK1/MAPK3/FOS/BCL2	4
hsa04020	Calcium signaling pathway	0.0882353	240/8192	0.0143032	0.023955	0.00758922	HGF/ERBB2/EGFR/NTRK2/MET/VEGFA	6
hsa04670	Leukocyte transendothelial migration	0.0588235	114/8192	0.0146342	0.0243116	0.0077022	VCL/ICAM1/CTNNB1/MMP9	4
hsa04929	GnRH secretion	0.0441176	64/8192	0.0158928	0.0261913	0.0082977	MAPK1/MAPK3/SPP1	3
hsa04622	RIG-I-like receptor signaling pathway	0.0441176	70/8192	0.0201607	0.0329612	0.0104425	NFKBIA/NFKB1/TBK1	3
hsa04137	Mitophagy - animal	0.0441176	72/8192	0.0217104	0.0352152	0.0111566	BCL2L1/HIF1A/TBK1	3
hsa04114	Oocyte meiosis	0.0588235	131/8192	0.0231519	0.0369712	0.0117129	MAPK1/MAPK3/CDK2/YWHAZ	4
hsa04650	Natural killer cell mediated cytotoxicity	0.0588235	131/8192	0.0231519	0.0369712	0.0117129	MAPK1/MAPK3/ICAM1/CASP3	4
hsa03320	PPAR signaling pathway	0.0441176	75/8192	0.0241542	0.0382751	0.012126	UCP1/PPARD/PPARA	3
hsa04270	Vascular smooth muscle contraction	0.0588235	134/8192	0.0249116	0.039174	0.0124108	MAPK1/MAPK3/PRKCE/PRKCD	4
hsa05100	Bacterial invasion of epithelial cells	0.0441176	77/8192	0.0258631	0.040362	0.0127872	VCL/MET/CTNNB1	3
hsa04910	Insulin signaling pathway	0.0588235	137/8192	0.0267506	0.0414332	0.0131265	MAPK1/MAPK3/INSR/GSK3B	4
hsa04072	Phospholipase D signaling pathway	0.0588235	148/8192	0.0341804	0.0525459	0.0166472	MAPK1/MAPK3/EGFR/INSR	4
hsa04060	Cytokine-cytokine receptor interaction	0.0882353	295/8192	0.0350926	0.0535487	0.0169648	NGFR/TGFB1/BMP4/IL1A/IL6/IL10	6
hsa04540	Gap junction	0.0441176	88/8192	0.0363945	0.0551269	0.0174648	MAPK1/MAPK3/EGFR	3
hsa04211	Longevity regulating pathway	0.0441176	89/8192	0.0374462	0.0558979	0.0177091	NFKB1/BAX/INSR	3
hsa04976	Bile secretion	0.0441176	89/8192	0.0374462	0.0558979	0.0177091	ABCG2/HMGCR/UGT1A6	3
hsa04150	mTOR signaling pathway	0.0588235	156/8192	0.0402706	0.0596815	0.0189078	MAPK1/MAPK3/INSR/GSK3B	4
hsa04713	Circadian entrainment	0.0441176	97/8192	0.046415	0.0682963	0.0216371	MAPK1/MAPK3/FOS	3
hsa05332	Graft-versus-host disease	0.0294118	42/8192	0.0472467	0.0690271	0.0218686	IL1A/IL6	2
hsa04750	Inflammatory mediator regulation of TRP channels	0.0441176	98/8192	0.0476047	0.0690603	0.0218791	TRPA1/PRKCE/PRKCD	3
hsa00860	Porphyrin metabolism	0.0294118	43/8192	0.0492916	0.07095	0.0224778	HMOX1/UGT1A6	2
hsa04022	cGMP-PKG signaling pathway	0.0588235	167/8192	0.0495961	0.07095	0.0224778	MAPK1/MAPK3/INSR/PRKCE	4
